# Supplementary material for: Analysis of Tissue-Specific Defense Responses to Sclerotinia sclerotiorum in Brassica napus
Source: MDPI journal article supplement (doi:10.3390/plants11152001), 2022-07-31
Supplement: s1 [file s1]

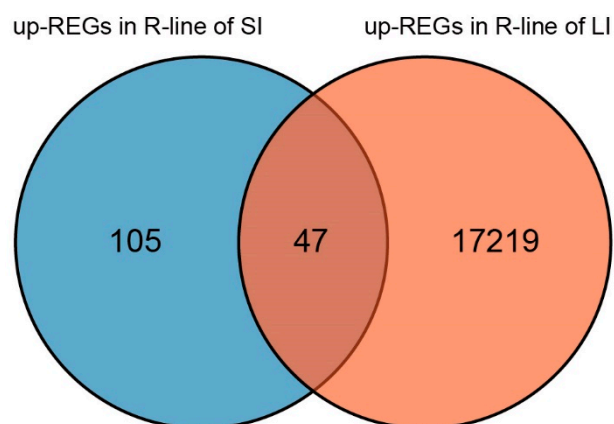

**Figure S1.** Unique and common up-REG in R-line of SI and LI.

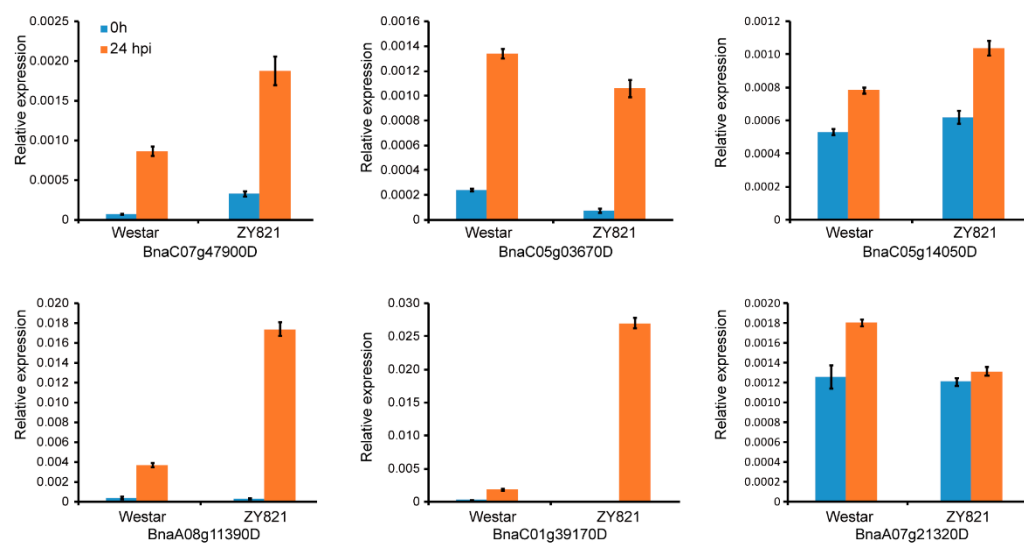

**Figure S2.** Transcriptome data validation by qRT-PCR of six genes.
