# Supplementary material for: Analysis of Tissue-Specific Defense Responses to Sclerotinia sclerotiorum in Brassica napus
Source: Plants (Basel). 2022 Jul 31;11(15):2001. doi: 10.3390/plants11152001 (PMC9370628; doi:10.3390/plants11152001)
Supplement: Supplementary file 1 [file plants-11-02001-s001.zip]

Archive with 7 entries (7 files):
- plants-1826220-supplementary/plants-1826220_supplemnetary-done.pdf
- plants-1826220-supplementary/Table S1.xlsx
- plants-1826220-supplementary/Table S2.xlsx
- plants-1826220-supplementary/Table S3.xlsx
- plants-1826220-supplementary/Table S4.xlsx
- plants-1826220-supplementary/Table S5.xlsx
- plants-1826220-supplementary/Table S6.xlsx
