# Supplementary material for: Analysis of Tissue-Specific Defense Responses to Sclerotinia sclerotiorum in Brassica napus
Source: Plants (Basel). 2022 Jul 31;11(15):2001. doi: 10.3390/plants11152001 (PMC9370628; doi:10.3390/plants11152001)
Supplement: Supplementary file 1 [file plants-11-02001-s001.zip › plants-1826220-supplementary/Table S1.xlsx]

## Sheet: Sheet1
Supplementary table 1 - Gene list of up-REG and down-REG in SI experiment
R-line			S-line
up-REG	down-REG		up-REG	down-REG
BnaC01g30760D	BnaA05g27380D		BnaA01g00190D	BnaC09g12780D
BnaC04g03110D	BnaA05g27550D		BnaA01g00410D	BnaC09g12190D
BnaC04g02990D	BnaA05g27730D		BnaA01g00640D	BnaC09g12120D
BnaA06g01390D	BnaA06g25060D		BnaA01g00670D	BnaA05g27090D
BnaA05g33290D	BnaA06g23960D		BnaA01g01040D	BnaA05g27210D
BnaCnng68980D	BnaA06g23750D		BnaA01g01080D	BnaA05g27330D
BnaA04g22070D	BnaA06g23720D		BnaA01g01230D	BnaA05g27410D
BnaA09g07270D	BnaC08g11780D		BnaA01g01470D	BnaA05g27440D
BnaC04g04780D	BnaA02g05170D		BnaA01g01560D	BnaA05g27760D
BnaC04g04350D	BnaA02g05900D		BnaA01g01910D	BnaA05g27970D
BnaC05g14050D	BnaA06g35280D		BnaA01g02160D	BnaA05g28480D
BnaCnng69780D	BnaC08g21610D		BnaA01g02470D	BnaC04g19890D
BnaCnng24580D	BnaC04g03540D		BnaA01g02490D	BnaA06g24960D
BnaA01g29240D	BnaC03g31050D		BnaA01g02850D	BnaA06g24600D
BnaA05g34670D	BnaC07g04210D		BnaA01g02930D	BnaA06g24350D
BnaCnng25440D	BnaC05g02100D		BnaA01g03010D	BnaA06g23870D
BnaA06g01730D	BnaC05g02440D		BnaA01g03020D	BnaC08g11290D
BnaC02g24210D	BnaC05g03070D		BnaA01g03150D	BnaC08g11300D
BnaCnng27850D	BnaAnng33580D		BnaA01g03570D	BnaC08g11320D
BnaA04g29550D	BnaA04g27220D		BnaA01g03820D	BnaC08g11840D
BnaA02g35730D	BnaA10g03490D		BnaA01g03960D	BnaC08g11850D
BnaC01g39170D	BnaC04g02360D		BnaA01g04520D	BnaC08g11860D
BnaA08g05710D	BnaAnng10890D		BnaA01g04540D	BnaC08g11980D
BnaA01g18400D	BnaA05g36810D		BnaA01g05130D	BnaC01g30800D
BnaC03g41040D	BnaA09g52080D		BnaA01g05280D	BnaC01g30780D
BnaC07g31540D	BnaC01g41020D		BnaA01g05390D	BnaC08g10210D
BnaC04g52990D	BnaA04g21810D		BnaA01g05410D	BnaA02g05540D
BnaCnng34330D	BnaA09g07420D		BnaA01g05420D	BnaA02g05910D
BnaA07g02620D	BnaA09g07410D		BnaA01g06270D	BnaA02g05940D
BnaCnng35440D	BnaC04g04840D		BnaA01g06460D	BnaA02g06390D
BnaC03g22030D	BnaC04g03870D		BnaA01g06540D	BnaA02g06420D
BnaA07g38540D	BnaC01g20780D		BnaA01g06770D	BnaA02g06460D
BnaCnng78230D	BnaA01g36120D		BnaA01g07150D	BnaC03g63230D
BnaC09g43250D	BnaC07g48980D		BnaA01g07430D	BnaC03g63240D
BnaC05g03670D	BnaCnng22370D		BnaA01g07450D	BnaC01g26800D
BnaCnng03760D	BnaAnng34830D		BnaA01g08010D	BnaA06g34110D
BnaC09g20430D	BnaA05g35030D		BnaA01g08080D	BnaA06g34380D
BnaC06g05910D	BnaCnng22800D		BnaA01g08360D	BnaA06g34450D
BnaCnng38640D	BnaCnng22830D		BnaA01g08620D	BnaA06g34500D
BnaA06g12450D	BnaC07g49530D		BnaA01g08920D	BnaA06g34940D
BnaA06g11500D	BnaAnng11580D		BnaA01g09200D	BnaA06g35460D
BnaA09g26310D	BnaAnng35010D		BnaA01g09400D	BnaC04g03470D
BnaCnng42980D	BnaC02g47770D		BnaA01g09540D	BnaC04g03460D
BnaCnng06000D	BnaCnng23400D		BnaA01g10320D	BnaC03g30470D
BnaA01g34510D	BnaCnng23650D		BnaA01g10360D	BnaC03g30510D
BnaC01g41850D	BnaC06g27800D		BnaA01g10460D	BnaC03g30930D
BnaC02g44900D	BnaA04g29290D		BnaA01g10630D	BnaC03g31050D
BnaCnng46790D	BnaCnng24460D		BnaA01g10690D	BnaC07g04150D
BnaCnng47650D	BnaC01g41460D		BnaA01g11510D	BnaA01g23290D
BnaA02g34250D	BnaC05g08760D		BnaA01g11860D	BnaA01g23840D
BnaA05g08660D	BnaC04g11710D		BnaA01g12270D	BnaA01g23870D
BnaC01g36670D	BnaC09g31850D		BnaA01g12340D	BnaC05g01630D
BnaC04g52060D	BnaA09g03190D		BnaA01g12840D	BnaC05g01690D
BnaA02g07210D	BnaA09g02760D		BnaA01g12870D	BnaC05g01910D
BnaC04g08480D	BnaA09g02240D		BnaA01g12890D	BnaC05g01920D
BnaC04g08440D	BnaA09g02020D		BnaA01g13600D	BnaC05g01980D
BnaC01g32990D	BnaA01g29030D		BnaA01g13650D	BnaC05g02350D
BnaAnng22640D	BnaAnng35740D		BnaA01g13810D	BnaC05g02410D
BnaCnng52390D	BnaC01g43920D		BnaA01g13850D	BnaC05g02520D
BnaA05g30260D	BnaCnng71550D		BnaA01g13950D	BnaC05g02700D
BnaC03g13250D	BnaA09g54980D		BnaA01g14190D	BnaC09g30600D
BnaC03g60170D	BnaC04g05770D		BnaA01g14310D	BnaC09g30700D
BnaC04g12350D	BnaC07g12470D		BnaA01g14370D	BnaC09g30770D
BnaC05g07900D	BnaC08g14590D		BnaA01g14380D	BnaA03g07100D
BnaA10g11390D	BnaC08g14230D		BnaA01g14690D	BnaA03g07040D
BnaC04g13900D	BnaC08g13920D		BnaA01g14860D	BnaA03g07030D
BnaA10g27420D	BnaA02g09020D		BnaA01g14950D	BnaCnng20460D
BnaA09g17030D	BnaA02g09030D		BnaA01g14960D	BnaA10g11680D
BnaA01g05760D	BnaA09g52770D		BnaA01g15110D	BnaA10g11660D
BnaA10g08410D	BnaC07g17120D		BnaA01g15300D	BnaA06g23580D
BnaA02g04350D	BnaA09g30630D		BnaA01g15390D	BnaA06g23570D
BnaA02g17670D	BnaA09g30150D		BnaA01g15410D	BnaA06g23500D
BnaCnng62010D	BnaC09g47660D		BnaA01g15930D	BnaCnng68200D
BnaC05g01320D	BnaA09g44300D		BnaA01g16130D	BnaAnng33580D
BnaA03g17020D	BnaA09g44850D		BnaA01g16310D	BnaC02g45710D
BnaC02g43170D	BnaA06g20570D		BnaA01g16390D	BnaC08g46210D
BnaC09g14710D	BnaCnng28410D		BnaA01g16490D	BnaC08g46250D
BnaA02g29380D	BnaA01g36280D		BnaA01g16540D	BnaA06g01430D
BnaA10g03720D	BnaAnng37580D		BnaA01g16910D	BnaA04g26960D
BnaCnng14680D	BnaCnng28690D		BnaA01g17210D	BnaA05g36620D
BnaCnng63660D	BnaA02g36540D		BnaA01g17530D	BnaC03g59120D
BnaA06g16650D	BnaA05g34290D		BnaA01g17700D	BnaC04g02430D
BnaA05g10890D	BnaA06g38130D		BnaA01g17800D	BnaC04g02360D
BnaA06g39220D	BnaA02g35760D		BnaA01g18100D	BnaA05g33210D
BnaC04g22060D	BnaC05g49360D		BnaA01g18330D	BnaA05g33390D
BnaC05g13350D	BnaC09g00910D		BnaA01g18390D	BnaC03g72980D
BnaA06g09010D	BnaA09g00780D		BnaA01g18400D	BnaCnng20960D
BnaA09g06090D	BnaA09g01390D		BnaA01g18660D	BnaC02g45800D
BnaA09g06030D	BnaC01g39520D		BnaA01g18670D	BnaAnng10870D
BnaC07g47900D	BnaC02g25910D		BnaA01g18990D	BnaA03g58930D
BnaCnng67070D	BnaA06g36370D		BnaA01g19120D	BnaA09g52010D
BnaA05g37410D	BnaC03g22840D		BnaA01g19350D	BnaA05g32780D
BnaCnng68150D	BnaC08g43470D		BnaA01g19870D	BnaA05g32810D
BnaA07g19130D	BnaCnng30840D		BnaA01g20600D	BnaC05g49600D
BnaA07g20150D	BnaCnng30870D		BnaA01g20630D	BnaC03g75950D
BnaA07g21320D	BnaC04g52120D		BnaA01g21120D	BnaC06g41940D
BnaC04g27780D	BnaCnng31530D		BnaA01g21860D	BnaC04g51720D
BnaA07g30990D	BnaCnng31550D		BnaA01g22500D	BnaAnng34160D
BnaA05g24540D	BnaC01g42090D		BnaA01g23480D	BnaAnng34210D
BnaA05g24100D	BnaC08g48630D		BnaA01g23510D	BnaC03g73700D
BnaC04g40560D	BnaC03g40840D		BnaA01g23770D	BnaC03g73710D
BnaC02g35940D	BnaC07g31180D		BnaA01g23850D	BnaC01g41020D
BnaC02g35400D	BnaC04g49870D		BnaA01g23940D	BnaAnng34270D
BnaC08g26070D	BnaC06g24560D		BnaA01g23960D	BnaCnng68980D
BnaA03g31790D	BnaC08g48840D		BnaA01g24090D	BnaAnng34290D
BnaA03g28150D	BnaA07g38770D		BnaA01g24320D	BnaA08g31490D
BnaA07g11220D	BnaA06g37990D		BnaA01g24790D	BnaCnng21680D
BnaC06g28000D	BnaA02g35160D		BnaA01g24800D	BnaCnng21740D
BnaC06g29500D	BnaCnng32890D		BnaA01g24850D	BnaA03g54770D
BnaC02g10190D	BnaCnng75720D		BnaA01g24920D	BnaA04g28730D
BnaA05g07580D	BnaA01g21670D		BnaA01g24940D	BnaCnng69070D
BnaA05g07730D	BnaA06g00380D		BnaA01g25010D	BnaCnng21890D
BnaC02g37440D	BnaA06g01000D		BnaA01g25280D	BnaA10g29560D
BnaC06g26190D	BnaCnng33310D		BnaA01g25510D	BnaA03g55240D
BnaAnng01320D	BnaC04g53020D		BnaA01g25950D	BnaA02g34710D
BnaA01g03020D	BnaC04g53030D		BnaA01g26100D	BnaA09g53950D
BnaA04g22700D	BnaC07g50680D		BnaA01g26180D	BnaAnng34570D
BnaA04g03780D	BnaA01g34980D		BnaA01g26250D	BnaA01g35940D
BnaA08g11390D	BnaCnng76420D		BnaA01g26430D	BnaC02g44590D
BnaA08g10180D	BnaA05g37040D		BnaA01g26560D	BnaC05g52090D
BnaA08g08750D	BnaC09g51720D		BnaA01g26670D	BnaA04g21190D
BnaC04g37950D	BnaC09g51740D		BnaA01g26750D	BnaA01g27000D
BnaA07g06530D	BnaA07g02490D		BnaA01g26860D	BnaA01g26820D
BnaC01g04250D	BnaC05g33040D		BnaA01g26980D	BnaA01g26770D
BnaC06g19600D	BnaA05g30280D		BnaA01g27150D	BnaA01g26730D
BnaC06g18870D	BnaA08g14820D		BnaA01g27190D	BnaA01g26630D
BnaC03g18040D	BnaA08g14630D		BnaA01g27990D	BnaA09g08030D
BnaA05g00940D	BnaC03g74610D		BnaA01g28120D	BnaA09g07840D
BnaA05g00280D	BnaC09g52550D		BnaA01g28190D	BnaA09g07400D
BnaC09g35160D	BnaA02g37030D		BnaA01g28590D	BnaA09g06870D
BnaC07g28660D	BnaC02g45000D		BnaA01g28700D	BnaA09g06760D
BnaC03g00830D	BnaCnng35860D		BnaA01g28810D	BnaA09g06690D
BnaC09g08130D	BnaC03g22200D		BnaA01g28840D	BnaAnng02580D
BnaA10g24560D	BnaC03g21960D		BnaA01g28910D	BnaAnng02600D
BnaC08g37940D	BnaC06g04480D		BnaA01g28930D	BnaAnng02760D
BnaC08g36830D	BnaA02g21660D		BnaA01g28970D	BnaAnng02990D
BnaA03g34290D	BnaC04g54220D		BnaA01g29220D	BnaAnng03040D
BnaA03g22920D	BnaAnng17210D		BnaA01g29240D	BnaAnng03050D
BnaC08g17880D	BnaC05g50820D		BnaA01g29770D	BnaAnng03060D
BnaC03g11570D	BnaC05g49630D		BnaA01g29880D	BnaAnng03220D
BnaC04g10980D	BnaAnng17350D		BnaA01g29980D	BnaC04g04450D
BnaA03g16830D	BnaCnng78240D		BnaA01g29990D	BnaC04g04280D
BnaA02g03750D	BnaC05g48970D		BnaA01g30630D	BnaC04g03880D
BnaA07g32900D	BnaC07g34010D		BnaA01g30740D	BnaC01g20780D
BnaA06g28230D	BnaC07g33430D		BnaA01g30870D	BnaC01g20580D
BnaC06g37440D	BnaC09g43860D		BnaA01g31200D	BnaC01g20350D
BnaA03g10550D	BnaC08g45280D		BnaA01g31400D	BnaA04g18230D
BnaA01g16450D	BnaC08g44030D		BnaA01g31610D	BnaA04g18440D
BnaC07g40480D	BnaC08g43690D		BnaA01g31630D	BnaA04g18460D
BnaC04g45790D	BnaC05g04020D		BnaA01g32170D	BnaA04g18550D
BnaC08g29670D	BnaCnng02590D		BnaA01g32180D	BnaA04g19060D
BnaC01g18730D	BnaC03g70450D		BnaA01g32400D	BnaC05g13810D
	BnaA04g13330D		BnaA01g32660D	BnaC05g14010D
	BnaA05g14430D		BnaA01g32900D	BnaC05g14020D
	BnaC09g32750D		BnaA01g33350D	BnaA01g36180D
	BnaC06g06260D		BnaA01g33400D	BnaA07g39140D
	BnaCnng78620D		BnaA01g33580D	BnaCnng22450D
	BnaCnng38120D		BnaA01g33650D	BnaA04g27920D
	BnaAnng42000D		BnaA01g33660D	BnaC03g61080D
	BnaAnng17770D		BnaA01g33800D	BnaC03g61130D
	BnaAnng17970D		BnaA01g33870D	BnaCnng22540D
	BnaA03g58720D		BnaA01g34520D	BnaCnng22570D
	BnaA06g11860D		BnaA01g34620D	BnaA05g34990D
	BnaC09g42220D		BnaA01g34650D	BnaA05g35040D
	BnaA06g13430D		BnaA01g34720D	BnaC03g71770D
	BnaA06g13410D		BnaA01g34910D	BnaC03g71780D
	BnaCnng40170D		BnaA01g35740D	BnaAnng34880D
	BnaA03g58390D		BnaA01g36190D	BnaC08g49190D
	BnaC09g36400D		BnaA01g36210D	BnaCnng22760D
	BnaC09g36340D		BnaA01g36230D	BnaC04g54290D
	BnaA02g10950D		BnaA01g36280D	BnaC04g54340D
	BnaA09g35840D		BnaA01g37030D	BnaC09g53340D
	BnaA09g35410D		BnaA01g37160D	BnaC03g73260D
	BnaAnng18460D		BnaA01g37170D	BnaCnng69940D
	BnaC04g51650D		BnaA01g37180D	BnaC02g47770D
	BnaA09g28200D		BnaA02g00190D	BnaCnng23260D
	BnaA05g31250D		BnaA02g01150D	BnaCnng23270D
	BnaC05g44040D		BnaA02g01410D	BnaC02g44520D
	BnaCnng41800D		BnaA02g01460D	BnaCnng23400D
	BnaC02g48820D		BnaA02g01680D	BnaA09g56570D
	BnaC02g47660D		BnaA02g01980D	BnaCnng23860D
	BnaA10g28720D		BnaA02g02000D	BnaC03g77900D
	BnaA01g34610D		BnaA02g02280D	BnaCnng23900D
	BnaC09g32490D		BnaA02g02310D	BnaA06g01540D
	BnaC09g32320D		BnaA02g02470D	BnaA06g01680D
	BnaA07g36650D		BnaA02g02540D	BnaAnng35540D
	BnaAnng19370D		BnaA02g02770D	BnaA09g14100D
	BnaCnng06060D		BnaA02g03240D	BnaA09g14140D
	BnaA02g09640D		BnaA02g03330D	BnaC03g76650D
	BnaA02g25520D		BnaA02g03490D	BnaCnng24140D
	BnaA02g25150D		BnaA02g03850D	BnaCnng24180D
	BnaC07g32280D		BnaA02g03980D	BnaCnng24260D
	BnaC07g32870D		BnaA02g04000D	BnaAnng12000D
	BnaC01g19620D		BnaA02g04190D	BnaAnng12050D
	BnaC08g48320D		BnaA02g04260D	BnaC05g08430D
	BnaA06g37910D		BnaA02g04320D	BnaC05g09210D
	BnaCnng45070D		BnaA02g04350D	BnaC04g11710D
	BnaC05g32170D		BnaA02g04630D	BnaC09g13540D
	BnaA06g14510D		BnaA02g04810D	BnaA05g19780D
	BnaA03g53960D		BnaA02g05060D	BnaC09g29420D
	BnaA03g53980D		BnaA02g05510D	BnaA09g03690D
	BnaA04g17880D		BnaA02g05520D	BnaA09g03800D
	BnaA01g19200D		BnaA02g05560D	BnaA09g04500D
	BnaCnng45430D		BnaA02g05660D	BnaA09g04650D
	BnaC07g50180D		BnaA02g05780D	BnaA09g04840D
	BnaA02g35410D		BnaA02g05840D	BnaA09g04970D
	BnaC05g29010D		BnaA02g06130D	BnaA09g04980D
	BnaC05g09910D		BnaA02g06370D	BnaA09g04990D
	BnaC05g09770D		BnaA02g06400D	BnaC09g31620D
	BnaA09g09270D		BnaA02g06570D	BnaA09g02750D
	BnaA04g25000D		BnaA02g06730D	BnaA09g02120D
	BnaA04g25220D		BnaA02g06780D	BnaA09g02020D
	BnaA04g25750D		BnaA02g07020D	BnaA01g29290D
	BnaA04g25900D		BnaA02g07200D	BnaA01g29260D
	BnaA04g16380D		BnaA02g07230D	BnaA01g29230D
	BnaC06g43210D		BnaA02g07620D	BnaA01g29080D
	BnaCnng46890D		BnaA02g07630D	BnaC09g30230D
	BnaAnng03750D		BnaA02g08150D	BnaC09g30130D
	BnaAnng03830D		BnaA02g08230D	BnaC09g29940D
	BnaA02g35610D		BnaA02g08270D	BnaC09g29910D
	BnaCnng47540D		BnaA02g08430D	BnaA02g19500D
	BnaAnng20820D		BnaA02g08520D	BnaA05g35980D
	BnaC04g24330D		BnaA02g08530D	BnaA09g56690D
	BnaA08g26530D		BnaA02g09590D	BnaAnng12330D
	BnaA02g34400D		BnaA02g10050D	BnaC04g54380D
	BnaA02g34380D		BnaA02g10390D	BnaC04g54510D
	BnaA02g34120D		BnaA02g10490D	BnaC04g54520D
	BnaA02g34070D		BnaA02g10640D	BnaA09g52790D
	BnaC03g63920D		BnaA02g10830D	BnaA04g16470D
	BnaA10g13110D		BnaA02g11190D	BnaC02g47130D
	BnaA10g12900D		BnaA02g12050D	BnaC03g77980D
	BnaA10g12840D		BnaA02g12240D	BnaCnng25280D
	BnaC05g51160D		BnaA02g12360D	BnaC04g55720D
	BnaC01g14830D		BnaA02g12540D	BnaUnng04180D
	BnaA03g46460D		BnaA02g13090D	BnaCnng71190D
	BnaA03g46920D		BnaA02g13140D	BnaA04g27530D
	BnaC06g23400D		BnaA02g13180D	BnaA05g34630D
	BnaA03g00400D		BnaA02g13370D	BnaA01g25590D
	BnaA03g00780D		BnaA02g13720D	BnaC03g71410D
	BnaA03g00830D		BnaA02g13730D	BnaC09g54000D
	BnaA03g01500D		BnaA02g13910D	BnaCnng71250D
	BnaA09g39580D		BnaA02g14040D	BnaC04g52190D
	BnaC06g31870D		BnaA02g14510D	BnaAnng12520D
	BnaC06g31800D		BnaA02g14660D	BnaAnng12530D
	BnaC03g57690D		BnaA02g15350D	BnaA08g30180D
	BnaC03g57630D		BnaA02g15440D	BnaAnng12640D
	BnaA05g09090D		BnaA02g15550D	BnaAnng12670D
	BnaA05g08950D		BnaA02g15720D	BnaAnng12780D
	BnaA04g16630D		BnaA02g15960D	BnaCnng25540D
	BnaA04g16780D		BnaA02g16100D	BnaAnng36210D
	BnaC06g15910D		BnaA02g16120D	BnaA06g01790D
	BnaC03g71900D		BnaA02g17090D	BnaC02g46240D
	BnaC04g44840D		BnaA02g17360D	BnaA03g56960D
	BnaA01g17740D		BnaA02g17660D	BnaA07g38160D
	BnaC01g36410D		BnaA02g17670D	BnaA07g38250D
	BnaCnng49800D		BnaA02g17890D	BnaC03g73540D
	BnaA09g50710D		BnaA02g18150D	BnaC09g53440D
	BnaA02g07740D		BnaA02g18180D	BnaUnng04240D
	BnaC08g02750D		BnaA02g18390D	BnaA09g54910D
	BnaC02g11940D		BnaA02g18870D	BnaA09g54940D
	BnaAnng22170D		BnaA02g19550D	BnaA02g36400D
	BnaA07g37340D		BnaA02g20470D	BnaA07g36310D
	BnaC01g32940D		BnaA02g20620D	BnaA04g28830D
	BnaA09g45360D		BnaA02g20640D	BnaC04g36640D
	BnaA09g45890D		BnaA02g21230D	BnaC04g36370D
	BnaCnng07500D		BnaA02g21770D	BnaC04g36350D
	BnaCnng52180D		BnaA02g21980D	BnaC01g23990D
	BnaC03g62640D		BnaA02g22240D	BnaC02g24440D
	BnaC03g62600D		BnaA02g22560D	BnaC04g05700D
	BnaA09g27270D		BnaA02g23000D	BnaC04g05620D
	BnaA01g14130D		BnaA02g23510D	BnaC04g05440D
	BnaA01g14460D		BnaA02g23540D	BnaC07g11950D
	BnaA09g11640D		BnaA02g24100D	BnaC07g12320D
	BnaCnng52600D		BnaA02g24410D	BnaC07g12460D
	BnaA09g41590D		BnaA02g24690D	BnaC08g14540D
	BnaA01g32460D		BnaA02g25110D	BnaC08g13810D
	BnaA01g27540D		BnaA02g25150D	BnaA02g08330D
	BnaA01g27190D		BnaA02g25450D	BnaA02g08450D
	BnaA01g07970D		BnaA02g25550D	BnaA02g08480D
	BnaAnng23590D		BnaA02g26140D	BnaA02g08560D
	BnaC01g21080D		BnaA02g26210D	BnaA02g08900D
	BnaC02g09670D		BnaA02g26460D	BnaA02g09060D
	BnaC02g09760D		BnaA02g26980D	BnaA02g09170D
	BnaC03g58620D		BnaA02g27000D	BnaA02g09180D
	BnaA05g30010D		BnaA02g27070D	BnaC06g01490D
	BnaA05g29710D		BnaA02g27280D	BnaC06g01590D
	BnaA05g29580D		BnaA02g27290D	BnaA01g35770D
	BnaCnng53800D		BnaA02g27300D	BnaC01g43110D
	BnaA08g04320D		BnaA02g27670D	BnaA10g29120D
	BnaA01g31270D		BnaA02g27860D	BnaC06g43100D
	BnaA01g31220D		BnaA02g28030D	BnaCnng72110D
	BnaA01g31210D		BnaA02g28050D	BnaA06g38770D
	BnaA01g31200D		BnaA02g28060D	BnaCnng72210D
	BnaA01g31030D		BnaA02g28260D	BnaCnng26710D
	BnaC04g32870D		BnaA02g28880D	BnaC04g56610D
	BnaCnng54050D		BnaA02g29090D	BnaCnng27120D
	BnaA03g11410D		BnaA02g29320D	BnaA02g35650D
	BnaA03g11050D		BnaA02g29450D	BnaAnng13370D
	BnaAnng24050D		BnaA02g29540D	BnaA10g27910D
	BnaCnng54760D		BnaA02g29770D	BnaC02g48590D
	BnaC06g12620D		BnaA02g30400D	BnaC01g43070D
	BnaC06g12520D		BnaA02g31140D	BnaAnng37450D
	BnaA02g35250D		BnaA02g31260D	BnaCnng27800D
	BnaA05g34000D		BnaA02g31290D	BnaCnng27850D
	BnaC04g30050D		BnaA02g32780D	BnaCnng28030D
	BnaC04g00270D		BnaA02g33270D	BnaCnng28180D
	BnaCnng09130D		BnaA02g33870D	BnaA08g25580D
	BnaA09g11870D		BnaA02g33910D	BnaA08g25340D
	BnaA10g11480D		BnaA02g34440D	BnaA08g25180D
	BnaAnng25030D		BnaA02g34960D	BnaA08g24410D
	BnaUnng02510D		BnaA02g35030D	BnaA08g24400D
	BnaC03g26540D		BnaA02g35160D	BnaA01g33620D
	BnaC06g30160D		BnaA02g35610D	BnaA01g33630D
	BnaC06g30350D		BnaA02g35640D	BnaA01g33640D
	BnaA07g28600D		BnaA02g35740D	BnaC03g54010D
	BnaCnng56350D		BnaA02g35770D	BnaC03g29500D
	BnaC01g34820D		BnaA02g35930D	BnaC03g29830D
	BnaA03g50070D		BnaA02g35970D	BnaC03g29860D
	BnaA03g50310D		BnaA02g35980D	BnaC03g29960D
	BnaC06g27230D		BnaA02g36510D	BnaC03g30020D
	BnaA04g28950D		BnaA03g00260D	BnaA09g30420D
	BnaA03g58750D		BnaA03g00350D	BnaA09g30300D
	BnaCnng57030D		BnaA03g00380D	BnaA09g30260D
	BnaA04g14140D		BnaA03g00560D	BnaA09g30190D
	BnaUnng02650D		BnaA03g00570D	BnaC03g27520D
	BnaC02g42930D		BnaA03g00670D	BnaC03g27420D
	BnaA09g14900D		BnaA03g00720D	BnaC03g27180D
	BnaA02g26910D		BnaA03g00730D	BnaC03g27000D
	BnaA04g20880D		BnaA03g00900D	BnaC03g26940D
	BnaC02g33320D		BnaA03g00990D	BnaC09g47800D
	BnaAnng26460D		BnaA03g01080D	BnaC09g47310D
	BnaC04g28910D		BnaA03g01200D	BnaC09g46980D
	BnaC07g16140D		BnaA03g01310D	BnaC09g46770D
	BnaC07g16120D		BnaA03g01420D	BnaC09g46680D
	BnaC07g16020D		BnaA03g01450D	BnaA09g44170D
	BnaC03g33890D		BnaA03g01690D	BnaA09g44400D
	BnaAnng06130D		BnaA03g01840D	BnaA09g44570D
	BnaAnng06140D		BnaA03g01870D	BnaA09g44660D
	BnaAnng06150D		BnaA03g01910D	BnaA09g44950D
	BnaC02g41590D		BnaA03g02040D	BnaA02g34760D
	BnaC02g41710D		BnaA03g02250D	BnaA02g34880D
	BnaC06g30760D		BnaA03g02310D	BnaC05g50270D
	BnaA02g27670D		BnaA03g02380D	BnaCnng28330D
	BnaC05g14820D		BnaA03g02400D	BnaCnng28410D
	BnaC05g14910D		BnaA03g02490D	BnaCnng28590D
	BnaC05g14940D		BnaA03g02630D	BnaC02g44970D
	BnaC05g14950D		BnaA03g02640D	BnaAnng13830D
	BnaC08g26260D		BnaA03g03540D	BnaCnng73170D
	BnaA01g12890D		BnaA03g04050D	BnaAnng37730D
	BnaA01g32220D		BnaA03g04160D	BnaA02g36540D
	BnaA08g20880D		BnaA03g04180D	BnaA05g34260D
	BnaA06g22560D		BnaA03g04310D	BnaA05g34290D
	BnaC04g00770D		BnaA03g04320D	BnaA04g29190D
	BnaA09g15260D		BnaA03g04340D	BnaCnng73330D
	BnaA09g15430D		BnaA03g04370D	BnaCnng28890D
	BnaA09g15440D		BnaA03g04470D	BnaA04g29550D
	BnaA09g55960D		BnaA03g04960D	BnaA01g36370D
	BnaA01g05280D		BnaA03g05300D	BnaCnng73370D
	BnaC04g01210D		BnaA03g05310D	BnaA01g36530D
	BnaA05g11100D		BnaA03g05380D	BnaC06g04700D
	BnaA09g28400D		BnaA03g05390D	BnaC02g03490D
	BnaC05g40680D		BnaA03g05570D	BnaCnng29080D
	BnaA01g25950D		BnaA03g05840D	BnaA06g38130D
	BnaC02g46580D		BnaA03g06320D	BnaA06g38140D
	BnaA10g08520D		BnaA03g06610D	BnaA06g38150D
	BnaC01g00120D		BnaA03g06930D	BnaA08g29260D
	BnaC03g23960D		BnaA03g07060D	BnaCnng73760D
	BnaA01g17800D		BnaA03g07090D	BnaC02g44310D
	BnaCnng10850D		BnaA03g07130D	BnaA02g20170D
	BnaC05g48410D		BnaA03g07140D	BnaA05g36890D
	BnaUnng02910D		BnaA03g07390D	BnaCnng29880D
	BnaC07g14920D		BnaA03g07420D	BnaA09g55830D
	BnaAnng07060D		BnaA03g07610D	BnaC01g36150D
	BnaAnng07650D		BnaA03g07830D	BnaC01g35760D
	BnaC04g21580D		BnaA03g08000D	BnaC01g35630D
	BnaC02g23620D		BnaA03g08070D	BnaC09g00550D
	BnaA06g33280D		BnaA03g08540D	BnaC09g00580D
	BnaA08g13860D		BnaA03g08590D	BnaC09g01090D
	BnaA10g06640D		BnaA03g08880D	BnaA09g00500D
	BnaC03g20920D		BnaA03g08920D	BnaA09g00540D
	BnaC03g49470D		BnaA03g08950D	BnaA09g00700D
	BnaC03g49290D		BnaA03g09130D	BnaA09g00710D
	BnaA02g14340D		BnaA03g09210D	BnaA09g00820D
	BnaA01g13280D		BnaA03g09250D	BnaA09g01380D
	BnaC03g24290D		BnaA03g09290D	BnaA09g01430D
	BnaC02g41390D		BnaA03g09320D	BnaC01g39740D
	BnaAnng28440D		BnaA03g09400D	BnaC01g39600D
	BnaA02g29770D		BnaA03g09690D	BnaC01g39530D
	BnaCnng60730D		BnaA03g09990D	BnaC01g39520D
	BnaA02g13970D		BnaA03g10350D	BnaC01g39510D
	BnaAnng28960D		BnaA03g10640D	BnaC01g39220D
	BnaC01g42060D		BnaA03g10670D	BnaC01g39210D
	BnaA09g12600D		BnaA03g11190D	BnaC02g25400D
	BnaA07g32030D		BnaA03g11320D	BnaC02g25740D
	BnaA05g15180D		BnaA03g11410D	BnaC02g25950D
	BnaA09g12900D		BnaA03g11590D	BnaA06g36790D
	BnaC06g15710D		BnaA03g11650D	BnaA06g37010D
	BnaC09g11040D		BnaA03g11680D	BnaA06g37030D
	BnaCnng62600D		BnaA03g11690D	BnaA06g37230D
	BnaC05g19560D		BnaA03g11780D	BnaC03g61400D
	BnaC05g19570D		BnaA03g11820D	BnaC03g61760D
	BnaC04g47720D		BnaA03g11850D	BnaC03g23220D
	BnaC04g48620D		BnaA03g11920D	BnaC03g23350D
	BnaC03g44150D		BnaA03g12010D	BnaC05g24110D
	BnaC03g44240D		BnaA03g12490D	BnaC05g24200D
	BnaC05g00660D		BnaA03g12510D	BnaC05g24210D
	BnaC05g01240D		BnaA03g12560D	BnaC08g42990D
	BnaC05g01360D		BnaA03g13080D	BnaC08g43200D
	BnaC06g07780D		BnaA03g13450D	BnaC08g43390D
	BnaA03g17030D		BnaA03g13520D	BnaC08g43460D
	BnaA02g32960D		BnaA03g13640D	BnaC08g43510D
	BnaC09g31020D		BnaA03g13650D	BnaC09g52290D
	BnaA08g07260D		BnaA03g13730D	BnaAnng14200D
	BnaA01g13360D		BnaA03g13740D	BnaAnng14260D
	BnaC05g18920D		BnaA03g14140D	BnaCnng74050D
	BnaA10g03900D		BnaA03g14150D	BnaA09g55740D
	BnaC07g41860D		BnaA03g14300D	BnaC04g53250D
	BnaAnng30500D		BnaA03g14430D	BnaCnng30450D
	BnaA09g12280D		BnaA03g14520D	BnaA07g38660D
	BnaA09g12330D		BnaA03g14550D	BnaA03g55910D
	BnaA07g14280D		BnaA03g14630D	BnaAnng38640D
	BnaAnng09500D		BnaA03g14830D	BnaCnng30870D
	BnaAnng09540D		BnaA03g15050D	BnaC09g50890D
	BnaA02g08270D		BnaA03g15810D	BnaA06g40730D
	BnaA04g26870D		BnaA03g15870D	BnaA06g40780D
	BnaA02g16320D		BnaA03g15900D	BnaA06g40790D
	BnaA08g27580D		BnaA03g16020D	BnaA02g36210D
	BnaA08g28010D		BnaA03g16240D	BnaC04g52160D
	BnaC08g39950D		BnaA03g16290D	BnaC04g52170D
	BnaA09g29240D		BnaA03g16430D	BnaCnng31410D
	BnaC01g23420D		BnaA03g16530D	BnaC07g49890D
	BnaC04g43070D		BnaA03g16540D	BnaC08g46440D
	BnaA09g01540D		BnaA03g16670D	BnaCnng74600D
	BnaC02g34050D		BnaA03g16750D	BnaC06g43790D
	BnaA02g28080D		BnaA03g16830D	BnaCnng31690D
	BnaA10g11500D		BnaA03g16890D	BnaAnng39060D
	BnaA02g19320D		BnaA03g17030D	BnaCnng31860D
	BnaA02g29150D		BnaA03g17110D	BnaCnng31870D
	BnaC09g51250D		BnaA03g17150D	BnaA08g05660D
	BnaUnng03570D		BnaA03g17290D	BnaA08g05700D
	BnaA09g20010D		BnaA03g17310D	BnaA08g06010D
	BnaA09g05670D		BnaA03g17390D	BnaA06g02530D
	BnaA05g10650D		BnaA03g17400D	BnaA06g02520D
	BnaA05g10190D		BnaA03g17470D	BnaA06g02370D
	BnaA10g09640D		BnaA03g17810D	BnaA06g02080D
	BnaA10g09880D		BnaA03g17820D	BnaA06g02020D
	BnaA10g10030D		BnaA03g18370D	BnaA06g01990D
	BnaC03g44950D		BnaA03g18590D	BnaA01g18450D
	BnaC01g43590D		BnaA03g18600D	BnaA01g18730D
	BnaC01g43600D		BnaA03g18630D	BnaA01g18750D
	BnaC08g14850D		BnaA03g18870D	BnaC03g40860D
	BnaCnng66640D		BnaA03g18970D	BnaC03g40840D
	BnaAnng32610D		BnaA03g19120D	BnaC07g31050D
	BnaC02g16920D		BnaA03g19180D	BnaC07g30980D
	BnaAnng33020D		BnaA03g19340D	BnaA04g05960D
	BnaA03g56380D		BnaA03g19560D	BnaA08g12980D
	BnaC03g72010D		BnaA03g19630D	BnaA08g12890D
	BnaA07g16250D		BnaA03g19950D	BnaC04g49070D
	BnaA07g16490D		BnaA03g20030D	BnaC04g49360D
	BnaA07g16700D		BnaA03g20240D	BnaC04g49630D
	BnaA07g17230D		BnaA03g20590D	BnaC06g24750D
	BnaA07g20220D		BnaA03g20640D	BnaC06g24820D
	BnaA07g21130D		BnaA03g20650D	BnaAnng14510D
	BnaA07g21910D		BnaA03g20930D	BnaAnng14580D
	BnaA07g22750D		BnaA03g20980D	BnaC08g48840D
	BnaA07g23750D		BnaA03g21140D	BnaA05g33630D
	BnaC07g42360D		BnaA03g21190D	BnaA05g33540D
	BnaC07g42520D		BnaA03g21380D	BnaCnng32150D
	BnaC07g42530D		BnaA03g21500D	BnaC04g56820D
	BnaC07g43490D		BnaA03g21620D	BnaC04g56850D
	BnaC07g45870D		BnaA03g21640D	BnaAnng14750D
	BnaC07g45880D		BnaA03g21760D	BnaA05g35780D
	BnaC05g07430D		BnaA03g21790D	BnaC08g47730D
	BnaC05g07000D		BnaA03g21810D	BnaA09g55520D
	BnaC05g06280D		BnaA03g22290D	BnaA09g55550D
	BnaC05g06040D		BnaA03g22350D	BnaA07g38440D
	BnaC05g05680D		BnaA03g22740D	BnaCnng32630D
	BnaC03g24770D		BnaA03g22790D	BnaA06g40280D
	BnaC03g25710D		BnaA03g23240D	BnaAnng14950D
	BnaA07g28080D		BnaA03g24240D	BnaCnng32750D
	BnaA07g27370D		BnaA03g24730D	BnaA09g52190D
	BnaA07g27230D		BnaA03g24780D	BnaC08g47170D
	BnaA07g26080D		BnaA03g25240D	BnaC08g47180D
	BnaA07g28800D		BnaA03g25920D	BnaC08g47190D
	BnaA07g28820D		BnaA03g26130D	BnaA03g57530D
	BnaA07g29060D		BnaA03g26220D	BnaA03g57560D
	BnaA07g29300D		BnaA03g26420D	BnaA03g58470D
	BnaA07g29370D		BnaA03g26470D	BnaA03g58560D
	BnaA07g29960D		BnaA03g26490D	BnaA05g17760D
	BnaA07g30760D		BnaA03g26510D	BnaA05g17520D
	BnaA08g22100D		BnaA03g26660D	BnaC01g24170D
	BnaA08g23020D		BnaA03g26700D	BnaC01g24150D
	BnaA08g23120D		BnaA03g27060D	BnaC04g43780D
	BnaC06g32560D		BnaA03g27250D	BnaC04g43390D
	BnaC06g33270D		BnaA03g27260D	BnaC04g43370D
	BnaC06g34130D		BnaA03g27280D	BnaA01g21560D
	BnaC06g35810D		BnaA03g27290D	BnaA01g21620D
	BnaC06g36040D		BnaA03g27310D	BnaC04g01600D
	BnaC06g36860D		BnaA03g27460D	BnaC03g17300D
	BnaA02g21180D		BnaA03g27480D	BnaA06g00710D
	BnaC08g12880D		BnaA03g27530D	BnaA06g00750D
	BnaC08g13000D		BnaA03g27710D	BnaC04g53020D
	BnaA05g25220D		BnaA03g27740D	BnaC03g12430D
	BnaA05g25150D		BnaA03g27800D	BnaC03g12480D
	BnaA06g07000D		BnaA03g27980D	BnaC03g12520D
	BnaA06g08030D		BnaA03g28000D	BnaC03g12530D
	BnaA06g08670D		BnaA03g28120D	BnaCnng33450D
	BnaA06g08770D		BnaA03g28150D	BnaCnng33590D
	BnaC05g39340D		BnaA03g28230D	BnaC07g50680D
	BnaC05g38740D		BnaA03g28320D	BnaCnng33700D
	BnaA03g44610D		BnaA03g28400D	BnaC08g46760D
	BnaA03g44820D		BnaA03g28560D	BnaAnng15340D
	BnaA03g45460D		BnaA03g28760D	BnaA03g55630D
	BnaC09g49940D		BnaA03g28770D	BnaCnng33900D
	BnaC09g49160D		BnaA03g28780D	BnaC08g49060D
	BnaC09g48860D		BnaA03g28820D	BnaC08g49440D
	BnaC09g48850D		BnaA03g28910D	BnaAnng15770D
	BnaA06g17630D		BnaA03g29070D	BnaAnng15800D
	BnaA06g18300D		BnaA03g29090D	BnaA09g54000D
	BnaA06g18530D		BnaA03g29260D	BnaA09g54020D
	BnaC01g11030D		BnaA03g29290D	BnaAnng40350D
	BnaC08g25560D		BnaA03g29310D	BnaCnng76580D
	BnaC08g22740D		BnaA03g29570D	BnaC09g51730D
	BnaC09g01650D		BnaA03g29990D	BnaAnng15960D
	BnaC09g01450D		BnaA03g30240D	BnaCnng76750D
	BnaA06g21000D		BnaA03g30490D	BnaA09g56980D
	BnaA06g21360D		BnaA03g30580D	BnaCnng76920D
	BnaA06g21800D		BnaA03g30650D	BnaC01g38270D
	BnaA06g22070D		BnaA03g30850D	BnaA07g02520D
	BnaC04g23060D		BnaA03g31420D	BnaCnng04840D
	BnaC05g41900D		BnaA03g31490D	BnaC05g34700D
	BnaC05g41870D		BnaA03g31690D	BnaA01g22200D
	BnaC05g41500D		BnaA03g31750D	BnaA01g22220D
	BnaC05g40980D		BnaA03g31980D	BnaC05g32990D
	BnaA04g06060D		BnaA03g32020D	BnaA05g30330D
	BnaA03g28780D		BnaA03g32190D	BnaA05g30630D
	BnaA03g28370D		BnaA03g32240D	BnaA05g30820D
	BnaA03g27800D		BnaA03g32340D	BnaA05g30850D
	BnaA07g12020D		BnaA03g32380D	BnaA05g30860D
	BnaA07g12260D		BnaA03g32490D	BnaC04g13660D
	BnaA03g40120D		BnaA03g32930D	BnaA08g15260D
	BnaA03g39800D		BnaA03g33080D	BnaA08g15200D
	BnaA02g23180D		BnaA03g33150D	BnaA08g15180D
	BnaA08g00540D		BnaA03g33160D	BnaC02g48700D
	BnaA04g08060D		BnaA03g33470D	BnaCnng76990D
	BnaA04g07530D		BnaA03g33660D	BnaAnng40550D
	BnaC02g08080D		BnaA03g33670D	BnaA09g56100D
	BnaC02g11480D		BnaA03g33790D	BnaC07g51130D
	BnaC01g17030D		BnaA03g34080D	BnaC07g51140D
	BnaC01g16630D		BnaA03g34130D	BnaCnng35500D
	BnaC01g15520D		BnaA03g34270D	BnaC09g52590D
	BnaA02g14850D		BnaA03g34290D	BnaAnng40740D
	BnaA05g04020D		BnaA03g34330D	BnaC06g43860D
	BnaA05g04450D		BnaA03g34480D	BnaA02g37020D
	BnaA05g04720D		BnaA03g34510D	BnaAnng16370D
	BnaA05g04780D		BnaA03g34910D	BnaCnng35660D
	BnaA05g05910D		BnaA03g35240D	BnaAnng40840D
	BnaA05g06610D		BnaA03g35540D	BnaAnng40850D
	BnaA05g07340D		BnaA03g35760D	BnaA05g36380D
	BnaA05g07460D		BnaA03g36060D	BnaC02g46810D
	BnaA05g08150D		BnaA03g36070D	BnaAnng16520D
	BnaC07g11500D		BnaA03g36560D	BnaAnng16530D
	BnaC02g37820D		BnaA03g36620D	BnaAnng16570D
	BnaC04g18370D		BnaA03g36860D	BnaCnng35790D
	BnaA07g13020D		BnaA03g37050D	BnaA03g55720D
	BnaA07g13180D		BnaA03g37610D	BnaCnng35920D
	BnaA07g13320D		BnaA03g37740D	BnaCnng35940D
	BnaC05g16380D		BnaA03g38270D	BnaC05g49260D
	BnaC05g16460D		BnaA03g38380D	BnaC03g22220D
	BnaC05g16490D		BnaA03g38400D	BnaC06g18300D
	BnaC05g17770D		BnaA03g38670D	BnaC06g18520D
	BnaC03g28310D		BnaA03g38740D	BnaC06g18650D
	BnaC03g28860D		BnaA03g38760D	BnaC06g04030D
	BnaC05g45790D		BnaA03g38930D	BnaC06g04130D
	BnaC02g41200D		BnaA03g39030D	BnaC06g04300D
	BnaA02g32460D		BnaA03g39390D	BnaC06g04310D
	BnaA02g32360D		BnaA03g39640D	BnaA02g21960D
	BnaA10g05680D		BnaA03g39920D	BnaC01g30100D
	BnaA01g03570D		BnaA03g39990D	BnaA05g19010D
	BnaA01g02860D		BnaA03g40030D	BnaA05g18700D
	BnaA01g02650D		BnaA03g40110D	BnaA05g18690D
	BnaC08g21320D		BnaA03g40380D	BnaA01g36810D
	BnaA09g36610D		BnaA03g40620D	BnaCnng77640D
	BnaA09g50460D		BnaA03g40630D	BnaC04g55880D
	BnaA09g49520D		BnaA03g40690D	BnaA02g06860D
	BnaA09g48480D		BnaA03g40810D	BnaAnng41210D
	BnaC02g13020D		BnaA03g40830D	BnaCnng36750D
	BnaC02g13050D		BnaA03g40930D	BnaA10g27730D
	BnaA04g24070D		BnaA03g40940D	BnaCnng36880D
	BnaA04g23960D		BnaA03g41090D	BnaC07g50110D
	BnaA04g22910D		BnaA03g41220D	BnaC07g50120D
	BnaCnng01120D		BnaA03g41260D	BnaAnng17200D
	BnaC04g18920D		BnaA03g41470D	BnaAnng17250D
	BnaA07g24880D		BnaA03g41970D	BnaC05g49630D
	BnaA07g25460D		BnaA03g42110D	BnaCnng37280D
	BnaC06g15420D		BnaA03g42130D	BnaAnng41460D
	BnaC06g15040D		BnaA03g42140D	BnaC06g41630D
	BnaA03g18690D		BnaA03g42360D	BnaC05g48970D
	BnaA03g18570D		BnaA03g42560D	BnaC05g49040D
	BnaA03g18480D		BnaA03g42820D	BnaCnng37450D
	BnaA03g17750D		BnaA03g42860D	BnaC06g43710D
	BnaA05g14130D		BnaA03g43030D	BnaAnng41520D
	BnaC01g26050D		BnaA03g43120D	BnaA02g26710D
	BnaC01g26060D		BnaA03g43410D	BnaA02g26580D
	BnaA04g02500D		BnaA03g43610D	BnaA02g26290D
	BnaA04g02560D		BnaA03g43720D	BnaA02g26190D
	BnaA04g02730D		BnaA03g43870D	BnaA02g26100D
	BnaA04g04200D		BnaA03g44280D	BnaA02g25910D
	BnaA04g04360D		BnaA03g44360D	BnaA02g25860D
	BnaA04g04610D		BnaA03g44420D	BnaA02g25750D
	BnaA04g04850D		BnaA03g44570D	BnaC02g20410D
	BnaA08g10610D		BnaA03g44600D	BnaC05g23720D
	BnaA08g09510D		BnaA03g44820D	BnaC07g33540D
	BnaC08g31950D		BnaA03g45460D	BnaC09g43500D
	BnaC08g34160D		BnaA03g45680D	BnaC09g43450D
	BnaC04g38620D		BnaA03g45690D	BnaC09g43360D
	BnaC04g39650D		BnaA03g46010D	BnaC09g43350D
	BnaC04g40000D		BnaA03g46220D	BnaC08g45280D
	BnaC07g20040D		BnaA03g46230D	BnaC08g45170D
	BnaC07g20090D		BnaA03g46260D	BnaC08g45130D
	BnaC07g20350D		BnaA03g46490D	BnaC08g44970D
	BnaA09g32000D		BnaA03g46970D	BnaC08g44890D
	BnaA09g34280D		BnaA03g47020D	BnaC08g44880D
	BnaA09g34590D		BnaA03g47050D	BnaC08g44860D
	BnaA03g04460D		BnaA03g47210D	BnaC08g44590D
	BnaA03g05320D		BnaA03g47280D	BnaC08g44030D
	BnaA03g05560D		BnaA03g47570D	BnaC08g43810D
	BnaA03g06610D		BnaA03g47610D	BnaC08g43690D
	BnaC01g08130D		BnaA03g47800D	BnaC05g03470D
	BnaC01g06660D		BnaA03g48300D	BnaC05g03480D
	BnaC01g04870D		BnaA03g48330D	BnaC05g03500D
	BnaC01g04850D		BnaA03g48340D	BnaC05g04110D
	BnaC01g04120D		BnaA03g48400D	BnaC05g04410D
	BnaC01g03230D		BnaA03g48430D	BnaC05g04430D
	BnaC01g00800D		BnaA03g48730D	BnaC05g04530D
	BnaA01g11870D		BnaA03g48910D	BnaC05g04590D
	BnaA01g12320D		BnaA03g49260D	BnaC05g04700D
	BnaC03g19040D		BnaA03g49560D	BnaC05g04840D
	BnaC03g19670D		BnaA03g49810D	BnaC05g05130D
	BnaC03g20180D		BnaA03g50030D	BnaC05g29290D
	BnaA05g01330D		BnaA03g50450D	BnaCnng02680D
	BnaA05g00580D		BnaA03g50690D	BnaCnng02750D
	BnaA05g00520D		BnaA03g50710D	BnaCnng03210D
	BnaC07g30540D		BnaA03g50880D	BnaCnng03230D
	BnaC07g29940D		BnaA03g50990D	BnaCnng03360D
	BnaC07g29880D		BnaA03g51100D	BnaCnng03530D
	BnaC07g28690D		BnaA03g51180D	BnaCnng03580D
	BnaC03g01090D		BnaA03g51290D	BnaCnng03640D
	BnaC03g01800D		BnaA03g51620D	BnaCnng03650D
	BnaC03g02320D		BnaA03g52250D	BnaC03g70970D
	BnaC03g03480D		BnaA03g52970D	BnaC03g70880D
	BnaC02g18350D		BnaA03g53160D	BnaC03g70780D
	BnaA10g18590D		BnaA03g53300D	BnaC03g70740D
	BnaA10g18600D		BnaA03g53350D	BnaC03g70700D
	BnaA10g18690D		BnaA03g53750D	BnaC03g70030D
	BnaA10g18700D		BnaA03g54400D	BnaC09g39660D
	BnaA10g20060D		BnaA03g54430D	BnaC09g11200D
	BnaA10g23110D		BnaA03g54800D	BnaC09g11270D
	BnaA10g24230D		BnaA03g54810D	BnaC09g11490D
	BnaA10g24240D		BnaA03g54960D	BnaC09g11560D
	BnaA10g25070D		BnaA03g55550D	BnaA04g12790D
	BnaA10g26350D		BnaA03g56030D	BnaA04g12980D
	BnaC08g36840D		BnaA03g56310D	BnaA04g13120D
	BnaC02g21860D		BnaA03g56430D	BnaA04g13320D
	BnaC02g21230D		BnaA03g56530D	BnaC05g25300D
	BnaA03g34680D		BnaA03g56560D	BnaC03g69890D
	BnaA03g32960D		BnaA03g56700D	BnaA07g10350D
	BnaA01g20340D		BnaA03g56900D	BnaA07g10200D
	BnaA03g20300D		BnaA03g56930D	BnaC09g32660D
	BnaA03g20180D		BnaA03g56950D	BnaC09g20040D
	BnaA03g19960D		BnaA03g57110D	BnaC09g20020D
	BnaC07g23070D		BnaA03g57210D	BnaC06g06210D
	BnaC08g18710D		BnaA03g57310D	BnaC06g05870D
	BnaC08g18200D		BnaA03g57320D	BnaCnng37830D
	BnaC03g06010D		BnaA03g57330D	BnaC03g78270D
	BnaC03g06850D		BnaA03g57490D	BnaA09g29920D
	BnaC03g07110D		BnaA03g57570D	BnaCnng38040D
	BnaC03g07130D		BnaA03g57620D	BnaCnng78610D
	BnaC03g08460D		BnaA03g57860D	BnaA06g28500D
	BnaC03g10290D		BnaA03g57870D	BnaC01g40820D
	BnaC03g11450D		BnaA03g57880D	BnaA04g27100D
	BnaC03g11750D		BnaA03g57920D	BnaCnng78680D
	BnaC04g10350D		BnaA03g58000D	BnaCnng78700D
	BnaC04g10450D		BnaA03g58170D	BnaAnng41980D
	BnaA03g16360D		BnaA03g58240D	BnaCnng78750D
	BnaA03g16020D		BnaA03g58300D	BnaAnng42000D
	BnaC07g25000D		BnaA03g58370D	BnaCnng78760D
	BnaC07g25140D		BnaA03g58410D	BnaAnng17800D
	BnaA02g03580D		BnaA03g58750D	BnaCnng38570D
	BnaA02g03310D		BnaA03g59520D	BnaC07g49690D
	BnaA02g03150D		BnaA03g59590D	BnaC07g49770D
	BnaA02g02870D		BnaA03g59780D	BnaC03g73800D
	BnaA02g02700D		BnaA03g60240D	BnaC06g11050D
	BnaA02g01610D		BnaA03g60260D	BnaC06g11040D
	BnaA02g00410D		BnaA03g60560D	BnaC06g11000D
	BnaC06g22140D		BnaA04g00200D	BnaC06g10950D
	BnaC06g22120D		BnaA04g00240D	BnaC06g10880D
	BnaC03g55330D		BnaA04g00320D	BnaA06g12420D
	BnaC03g55690D		BnaA04g00360D	BnaA06g12190D
	BnaA06g30750D		BnaA04g00600D	BnaA06g12090D
	BnaA06g31650D		BnaA04g01070D	BnaA06g11830D
	BnaA06g31740D		BnaA04g01110D	BnaA06g11740D
	BnaC07g06340D		BnaA04g01280D	BnaA06g11670D
	BnaC08g01200D		BnaA04g01320D	BnaA06g11550D
	BnaC08g00880D		BnaA04g01580D	BnaA06g11540D
	BnaC08g00340D		BnaA04g01860D	BnaA09g26570D
	BnaC03g51740D		BnaA04g01870D	BnaA09g26590D
	BnaC03g52490D		BnaA04g01900D	BnaA03g60230D
	BnaC09g05230D		BnaA04g02330D	BnaA02g24020D
	BnaA07g32400D		BnaA04g02340D	BnaA02g24010D
	BnaC02g31700D		BnaA04g02380D	BnaA02g23810D
	BnaC02g31690D		BnaA04g02420D	BnaA02g23660D
	BnaA06g26150D		BnaA04g02430D	BnaC09g42450D
	BnaA06g26420D		BnaA04g02520D	BnaC09g42410D
	BnaA06g26540D		BnaA04g02720D	BnaC09g42290D
	BnaA06g27000D		BnaA04g03380D	BnaC01g23800D
	BnaC06g37650D		BnaA04g03420D	BnaA09g47290D
	BnaC06g37710D		BnaA04g03450D	BnaA09g47270D
	BnaC06g39400D		BnaA04g03470D	BnaA09g46780D
	BnaA03g09300D		BnaA04g03550D	BnaA09g46610D
	BnaA03g08880D		BnaA04g03610D	BnaA09g46490D
	BnaA03g08040D		BnaA04g03740D	BnaA09g46480D
	BnaA04g02490D		BnaA04g04090D	BnaA09g46280D
	BnaA04g02260D		BnaA04g04370D	BnaA06g13560D
	BnaA04g00530D		BnaA04g04420D	BnaA06g13020D
	BnaA01g15810D		BnaA04g04490D	BnaC09g09620D
	BnaA01g15700D		BnaA04g04600D	BnaC05g49740D
	BnaA01g15000D		BnaA04g04780D	BnaCnng39030D
	BnaC03g45280D		BnaA04g05050D	BnaC06g43370D
	BnaC03g45470D		BnaA04g05060D	BnaC01g42860D
	BnaC03g45540D		BnaA04g05120D	BnaCnng39220D
	BnaC03g45680D		BnaA04g05280D	BnaAnng18140D
	BnaA10g02830D		BnaA04g05470D	BnaC07g50890D
	BnaA10g02210D		BnaA04g05980D	BnaC03g72160D
	BnaA10g01150D		BnaA04g06460D	BnaA02g18660D
	BnaA10g00590D		BnaA04g06980D	BnaA05g18150D
	BnaA08g18970D		BnaA04g07030D	BnaA05g17900D
	BnaA08g18340D		BnaA04g07040D	BnaC09g36490D
	BnaA08g17540D		BnaA04g07520D	BnaC09g36340D
	BnaA03g43580D		BnaA04g07830D	BnaC09g36130D
	BnaA03g41780D		BnaA04g07970D	BnaC06g12190D
	BnaA03g23810D		BnaA04g08030D	BnaC06g12220D
	BnaA03g24410D		BnaA04g08750D	BnaA02g10480D
	BnaA03g24580D		BnaA04g08810D	BnaA02g10690D
	BnaA03g25760D		BnaA04g09460D	BnaA02g10740D
	BnaC02g06140D		BnaA04g09500D	BnaA02g10850D
	BnaC02g27350D		BnaA04g09820D	BnaA02g10860D
	BnaC02g27360D		BnaA04g10240D	BnaA02g10880D
	BnaC04g08140D		BnaA04g10580D	BnaA02g11080D
	BnaC04g07220D		BnaA04g10600D	BnaA08g07440D
	BnaC02g15670D		BnaA04g10650D	BnaA08g07570D
	BnaC03g31710D		BnaA04g10730D	BnaA08g07690D
	BnaC03g32010D		BnaA04g11190D	BnaA08g07940D
	BnaC03g33270D		BnaA04g11520D	BnaA09g36240D
	BnaA10g13790D		BnaA04g11890D	BnaA09g35890D
	BnaA10g14840D		BnaA04g11950D	BnaA09g35520D
	BnaC07g38730D		BnaA04g11960D	BnaA09g35380D
	BnaC07g39100D		BnaA04g12260D	BnaC04g50970D
	BnaA03g37360D		BnaA04g12350D	BnaC04g50860D
	BnaA03g37810D		BnaA04g12560D	BnaC04g50800D
	BnaA03g37890D		BnaA04g12610D	BnaC04g50670D
	BnaA03g38630D		BnaA04g13530D	BnaC04g50590D
	BnaA03g38740D		BnaA04g13540D	BnaC04g50540D
	BnaA03g38800D		BnaA04g13570D	BnaC04g50510D
	BnaC04g47040D		BnaA04g13600D	BnaC04g50420D
	BnaC04g45660D		BnaA04g13980D	BnaC04g50390D
	BnaC08g28170D		BnaA04g14320D	BnaC04g50370D
	BnaC08g28150D		BnaA04g14520D	BnaC04g50310D
	BnaC08g27340D		BnaA04g14720D	BnaC03g64510D
	BnaC08g26810D		BnaA04g15120D	BnaCnng40790D
	BnaA06g05020D		BnaA04g15290D	BnaA10g29230D
	BnaA09g23510D		BnaA04g15880D	BnaC04g56390D
	BnaC07g36430D		BnaA04g15900D	BnaA08g31180D
	BnaC07g36810D		BnaA04g15940D	BnaCnng41290D
	BnaC07g38250D		BnaA04g15980D	BnaC06g42460D
	BnaC01g18900D		BnaA04g15990D	BnaA09g52250D
	BnaC01g18750D		BnaA04g16030D	BnaCnng41750D
	BnaC01g17710D		BnaA04g16080D	BnaC04g51030D
	BnaC07g17610D		BnaA04g16490D	BnaC04g51120D
	BnaC03g43790D		BnaA04g17100D	BnaC04g51420D
			BnaA04g17340D	BnaC04g51600D
			BnaA04g17470D	BnaC04g51610D
			BnaA04g17900D	BnaC01g32520D
			BnaA04g17910D	BnaA09g27720D
			BnaA04g17930D	BnaA05g31200D
			BnaA04g18010D	BnaA05g31820D
			BnaA04g18120D	BnaA05g31990D
			BnaA04g18190D	BnaA05g32130D
			BnaA04g18210D	BnaA07g04640D
			BnaA04g18300D	BnaA07g04910D
			BnaA04g18320D	BnaCnng05250D
			BnaA04g19010D	BnaC05g44030D
			BnaA04g19910D	BnaC05g44040D
			BnaA04g19940D	BnaC05g44090D
			BnaA04g20190D	BnaC06g02630D
			BnaA04g20460D	BnaC06g02980D
			BnaA04g20760D	BnaC06g03160D
			BnaA04g21040D	BnaC03g76560D
			BnaA04g21410D	BnaC08g19200D
			BnaA04g21470D	BnaC02g47660D
			BnaA04g21670D	BnaAnng19090D
			BnaA04g21740D	BnaAnng19110D
			BnaA04g21810D	BnaCnng42810D
			BnaA04g21950D	BnaA01g06810D
			BnaA04g21960D	BnaA01g06430D
			BnaA04g22040D	BnaA01g06310D
			BnaA04g22170D	BnaA01g06120D
			BnaA04g22350D	BnaA01g06100D
			BnaA04g22400D	BnaA01g05980D
			BnaA04g22420D	BnaA01g05840D
			BnaA04g22480D	BnaC03g66740D
			BnaA04g22620D	BnaC03g66460D
			BnaA04g22680D	BnaA05g18390D
			BnaA04g22720D	BnaC02g36290D
			BnaA04g23010D	BnaA06g19490D
			BnaA04g23390D	BnaAnng19130D
			BnaA04g23500D	BnaC06g42050D
			BnaA04g23570D	BnaAnng19200D
			BnaA04g23760D	BnaCnng43240D
			BnaA04g23880D	BnaCnng43380D
			BnaA04g23900D	BnaC06g43970D
			BnaA04g24120D	BnaA03g12450D
			BnaA04g24390D	BnaA07g36660D
			BnaA04g25020D	BnaAnng19350D
			BnaA04g25220D	BnaCnng05480D
			BnaA04g25280D	BnaCnng05590D
			BnaA04g25510D	BnaCnng05600D
			BnaA04g25550D	BnaCnng05610D
			BnaA04g25570D	BnaCnng05740D
			BnaA04g25790D	BnaCnng05900D
			BnaA04g25900D	BnaCnng05980D
			BnaA04g25910D	BnaCnng06070D
			BnaA04g26040D	BnaA02g09460D
			BnaA04g26120D	BnaA02g09540D
			BnaA04g26190D	BnaA02g09790D
			BnaA04g26250D	BnaA02g09880D
			BnaA04g26280D	BnaC06g26330D
			BnaA04g26360D	BnaC06g26670D
			BnaA04g26410D	BnaA02g25380D
			BnaA04g26490D	BnaA02g25180D
			BnaA04g26580D	BnaA02g25020D
			BnaA04g26680D	BnaC07g32610D
			BnaA04g26760D	BnaC07g32760D
			BnaA04g27110D	BnaA09g53810D
			BnaA04g27270D	BnaC09g15540D
			BnaA04g27370D	BnaA06g25800D
			BnaA04g27410D	BnaA06g25670D
			BnaA04g27430D	BnaA06g25660D
			BnaA04g27940D	BnaA06g25480D
			BnaA04g28420D	BnaA06g25470D
			BnaA04g28560D	BnaA06g25320D
			BnaA04g28590D	BnaA06g25210D
			BnaA04g28600D	BnaC01g19630D
			BnaA04g28630D	BnaC01g19650D
			BnaA04g28640D	BnaC01g19660D
			BnaA04g28840D	BnaA08g30510D
			BnaA04g28860D	BnaCnng44110D
			BnaA04g28870D	BnaCnng44230D
			BnaA04g29060D	BnaA01g34490D
			BnaA04g29220D	BnaA01g34500D
			BnaA04g29230D	BnaC08g48320D
			BnaA04g29290D	BnaAnng19500D
			BnaA04g29580D	BnaA06g40150D
			BnaA05g00350D	BnaUnng00920D
			BnaA05g00390D	BnaCnng45290D
			BnaA05g00430D	BnaA05g16000D
			BnaA05g00460D	BnaA06g14140D
			BnaA05g00540D	BnaA06g14000D
			BnaA05g00570D	BnaA06g13890D
			BnaA05g00750D	BnaA06g13880D
			BnaA05g00770D	BnaA06g13830D
			BnaA05g00840D	BnaA06g13820D
			BnaA05g00930D	BnaA06g13810D
			BnaA05g01010D	BnaA06g13670D
			BnaA05g01080D	BnaC05g32170D
			BnaA05g01210D	BnaA06g15000D
			BnaA05g01290D	BnaA06g14380D
			BnaA05g01480D	BnaA03g53930D
			BnaA05g01490D	BnaA03g54060D
			BnaA05g01500D	BnaA03g54130D
			BnaA05g01570D	BnaA04g17700D
			BnaA05g01850D	BnaAnng03450D
			BnaA05g02040D	BnaAnng03600D
			BnaA05g02180D	BnaA01g19270D
			BnaA05g02320D	BnaA01g19260D
			BnaA05g02370D	BnaA01g19180D
			BnaA05g02380D	BnaA01g19110D
			BnaA05g02400D	BnaC05g31890D
			BnaA05g02480D	BnaC05g31770D
			BnaA05g02740D	BnaC05g31760D
			BnaA05g03100D	BnaC05g31620D
			BnaA05g03330D	BnaA02g36250D
			BnaA05g03580D	BnaC05g50170D
			BnaA05g03590D	BnaC03g76050D
			BnaA05g03710D	BnaA09g55990D
			BnaA05g03720D	BnaA06g38400D
			BnaA05g03750D	BnaC01g41860D
			BnaA05g04050D	BnaA03g48610D
			BnaA05g04150D	BnaA03g48890D
			BnaA05g04250D	BnaA03g48990D
			BnaA05g04520D	BnaA03g49150D
			BnaA05g04540D	BnaC05g29130D
			BnaA05g04770D	BnaC05g28960D
			BnaA05g04860D	BnaC01g40610D
			BnaA05g05020D	BnaC01g40290D
			BnaA05g05400D	BnaC01g40280D
			BnaA05g05590D	BnaC01g40190D
			BnaA05g05600D	BnaC01g40140D
			BnaA05g05610D	BnaC05g09910D
			BnaA05g05770D	BnaC05g09490D
			BnaA05g05850D	BnaC05g09370D
			BnaA05g06920D	BnaC05g37470D
			BnaA05g07070D	BnaC05g37340D
			BnaA05g07100D	BnaC05g37310D
			BnaA05g07210D	BnaA03g50000D
			BnaA05g07480D	BnaC04g31600D
			BnaA05g07490D	BnaC04g31640D
			BnaA05g07580D	BnaC04g31670D
			BnaA05g07590D	BnaA09g09390D
			BnaA05g07600D	BnaA09g09380D
			BnaA05g07610D	BnaA04g24730D
			BnaA05g07730D	BnaA04g25470D
			BnaA05g07740D	BnaCnng46590D
			BnaA05g07770D	BnaCnng46600D
			BnaA05g07820D	BnaC02g44900D
			BnaA05g08000D	BnaCnng46720D
			BnaA05g08110D	BnaCnng46790D
			BnaA05g08120D	BnaCnng46890D
			BnaA05g08130D	BnaCnng46940D
			BnaA05g08560D	BnaC07g03990D
			BnaA05g08630D	BnaC06g10130D
			BnaA05g08640D	BnaC06g10450D
			BnaA05g08720D	BnaA02g33090D
			BnaA05g09340D	BnaA02g33180D
			BnaA05g09350D	BnaA02g33190D
			BnaA05g09710D	BnaA02g33530D
			BnaA05g09800D	BnaC07g16710D
			BnaA05g10150D	BnaC07g16950D
			BnaA05g10960D	BnaC09g14880D
			BnaA05g11100D	BnaC09g14840D
			BnaA05g11200D	BnaA06g19860D
			BnaA05g11320D	BnaA06g19710D
			BnaA05g11340D	BnaA06g19600D
			BnaA05g11350D	BnaA06g19570D
			BnaA05g12200D	BnaCnng47160D
			BnaA05g12330D	BnaA03g57660D
			BnaA05g12500D	BnaC05g50730D
			BnaA05g12510D	BnaCnng47950D
			BnaA05g12670D	BnaCnng47970D
			BnaA05g12740D	BnaA08g26150D
			BnaA05g12930D	BnaA08g26190D
			BnaA05g13070D	BnaA08g26410D
			BnaA05g14430D	BnaA08g26770D
			BnaA05g14840D	BnaA08g26850D
			BnaA05g14980D	BnaC03g46870D
			BnaA05g16010D	BnaC08g15040D
			BnaA05g16830D	BnaA02g34430D
			BnaA05g17000D	BnaA02g34420D
			BnaA05g17260D	BnaA02g34380D
			BnaA05g17280D	BnaA02g34070D
			BnaA05g17290D	BnaA02g34040D
			BnaA05g17350D	BnaA02g34030D
			BnaA05g18280D	BnaA02g33970D
			BnaA05g18500D	BnaA02g33940D
			BnaA05g18660D	BnaA02g33920D
			BnaA05g18840D	BnaC03g63720D
			BnaA05g19050D	BnaC05g15860D
			BnaA05g19160D	BnaA10g13400D
			BnaA05g19320D	BnaA10g13380D
			BnaA05g19560D	BnaAnng20880D
			BnaA05g19650D	BnaC05g51160D
			BnaA05g19900D	BnaCnng48180D
			BnaA05g20190D	BnaAnng20940D
			BnaA05g20460D	BnaCnng48380D
			BnaA05g20700D	BnaCnng48410D
			BnaA05g20790D	BnaAnng20990D
			BnaA05g21090D	BnaAnng21020D
			BnaA05g21110D	BnaA03g56280D
			BnaA05g21220D	BnaA09g54760D
			BnaA05g21400D	BnaA05g17390D
			BnaA05g21410D	BnaA05g16720D
			BnaA05g21460D	BnaA05g11880D
			BnaA05g21540D	BnaA05g11810D
			BnaA05g21580D	BnaA05g11690D
			BnaA05g21650D	BnaA05g11390D
			BnaA05g21720D	BnaC01g14340D
			BnaA05g21830D	BnaC01g14390D
			BnaA05g22070D	BnaC01g15060D
			BnaA05g22260D	BnaA03g46380D
			BnaA05g22530D	BnaA03g46510D
			BnaA05g22730D	BnaA03g46540D
			BnaA05g23040D	BnaA03g46730D
			BnaA05g23080D	BnaA03g46920D
			BnaA05g23160D	BnaA03g47110D
			BnaA05g23260D	BnaA03g47120D
			BnaA05g23290D	BnaC06g23320D
			BnaA05g23380D	BnaA03g00100D
			BnaA05g23460D	BnaA03g00450D
			BnaA05g23530D	BnaA03g00690D
			BnaA05g23730D	BnaA03g00790D
			BnaA05g23810D	BnaA03g01040D
			BnaA05g24030D	BnaA03g01180D
			BnaA05g24200D	BnaA03g01570D
			BnaA05g24230D	BnaA03g01790D
			BnaA05g24390D	BnaA03g01940D
			BnaA05g24530D	BnaA09g39290D
			BnaA05g24750D	BnaA09g39420D
			BnaA05g24920D	BnaA09g39530D
			BnaA05g24950D	BnaA09g39570D
			BnaA05g25090D	BnaA09g39610D
			BnaA05g25220D	BnaA09g39860D
			BnaA05g25360D	BnaA09g40100D
			BnaA05g25630D	BnaA09g40220D
			BnaA05g25750D	BnaA09g40430D
			BnaA05g26030D	BnaA09g40530D
			BnaA05g26080D	BnaC06g31970D
			BnaA05g26640D	BnaC06g31930D
			BnaA05g26690D	BnaC06g31910D
			BnaA05g26710D	BnaC06g31890D
			BnaA05g26770D	BnaC06g31880D
			BnaA05g26800D	BnaC06g31870D
			BnaA05g27190D	BnaC06g31570D
			BnaA05g27280D	BnaC06g31050D
			BnaA05g27530D	BnaC06g31030D
			BnaA05g27670D	BnaC06g30880D
			BnaA05g27700D	BnaC06g30860D
			BnaA05g27790D	BnaC06g30850D
			BnaA05g27990D	BnaC06g12750D
			BnaA05g28110D	BnaC06g12920D
			BnaA05g28120D	BnaC06g13030D
			BnaA05g28220D	BnaC06g13180D
			BnaA05g28330D	BnaC06g13300D
			BnaA05g28580D	BnaC06g13410D
			BnaA05g28850D	BnaC06g13430D
			BnaA05g28950D	BnaA03g54490D
			BnaA05g29180D	BnaA03g54460D
			BnaA05g29310D	BnaA05g09020D
			BnaA05g29340D	BnaA05g08710D
			BnaA05g29370D	BnaA04g16670D
			BnaA05g29460D	BnaA04g16780D
			BnaA05g29580D	BnaA04g17040D
			BnaA05g29600D	BnaC09g13110D
			BnaA05g29720D	BnaC09g28330D
			BnaA05g29900D	BnaC06g15880D
			BnaA05g30040D	BnaCnng48830D
			BnaA05g30050D	BnaC09g51660D
			BnaA05g30120D	BnaCnng49190D
			BnaA05g30160D	BnaA10g29840D
			BnaA05g30690D	BnaA10g29870D
			BnaA05g30770D	BnaA06g39610D
			BnaA05g31030D	BnaA06g39650D
			BnaA05g31670D	BnaC08g48940D
			BnaA05g32160D	BnaA03g60430D
			BnaA05g32310D	BnaA07g03930D
			BnaA05g32400D	BnaC04g44980D
			BnaA05g32840D	BnaC04g44600D
			BnaA05g33020D	BnaCnng06690D
			BnaA05g33140D	BnaA03g54590D
			BnaA05g33230D	BnaC05g28570D
			BnaA05g33290D	BnaC05g28620D
			BnaA05g33460D	BnaC01g36710D
			BnaA05g33480D	BnaC01g36720D
			BnaA05g33580D	BnaC03g41710D
			BnaA05g34140D	BnaC03g42000D
			BnaA05g34440D	BnaC03g42170D
			BnaA05g34470D	BnaAnng21520D
			BnaA05g34540D	BnaAnng21640D
			BnaA05g34560D	BnaAnng21680D
			BnaA05g34620D	BnaCnng49910D
			BnaA05g34980D	BnaCnng49980D
			BnaA05g35260D	BnaCnng50100D
			BnaA05g35410D	BnaA09g51040D
			BnaA05g35970D	BnaA09g50710D
			BnaA05g36010D	BnaA09g50570D
			BnaA05g36230D	BnaA09g50540D
			BnaA05g36290D	BnaC03g15660D
			BnaA05g36370D	BnaA02g07730D
			BnaA05g36400D	BnaA02g07840D
			BnaA05g36700D	BnaA02g07850D
			BnaA05g36810D	BnaA02g07900D
			BnaA05g37070D	BnaA02g07980D
			BnaA06g00020D	BnaA02g08090D
			BnaA06g00050D	BnaC08g02750D
			BnaA06g00470D	BnaA09g16650D
			BnaA06g00800D	BnaA09g16640D
			BnaA06g01090D	BnaA10g11800D
			BnaA06g01160D	BnaA10g12140D
			BnaA06g01590D	BnaA10g12410D
			BnaA06g01640D	BnaC05g52210D
			BnaA06g01860D	BnaAnng22050D
			BnaA06g02230D	BnaC09g51750D
			BnaA06g02440D	BnaCnng50450D
			BnaA06g02820D	BnaA07g37340D
			BnaA06g02990D	BnaCnng50860D
			BnaA06g03010D	BnaC06g07270D
			BnaA06g03080D	BnaC06g07220D
			BnaA06g03640D	BnaC09g22120D
			BnaA06g03860D	BnaC09g22180D
			BnaA06g04090D	BnaC04g08810D
			BnaA06g04200D	BnaC04g08290D
			BnaA06g04320D	BnaC01g36930D
			BnaA06g04390D	BnaC01g36940D
			BnaA06g04630D	BnaC01g36990D
			BnaA06g04970D	BnaC01g37100D
			BnaA06g05000D	BnaC01g37160D
			BnaA06g05150D	BnaA01g19400D
			BnaA06g05210D	BnaAnng04290D
			BnaA06g05220D	BnaC05g12440D
			BnaA06g05270D	BnaC05g12200D
			BnaA06g05510D	BnaC05g12070D
			BnaA06g05540D	BnaC05g11960D
			BnaA06g05590D	BnaA07g04480D
			BnaA06g05680D	BnaA07g04430D
			BnaA06g05760D	BnaC01g33110D
			BnaA06g06040D	BnaC01g33080D
			BnaA06g06560D	BnaC07g49850D
			BnaA06g08030D	BnaC08g48810D
			BnaA06g08700D	BnaA08g30570D
			BnaA06g08850D	BnaC02g48780D
			BnaA06g09110D	BnaAnng22580D
			BnaA06g09120D	BnaA06g36180D
			BnaA06g09200D	BnaA06g36120D
			BnaA06g09610D	BnaA06g36070D
			BnaA06g09640D	BnaA06g36000D
			BnaA06g09660D	BnaA06g35980D
			BnaA06g09680D	BnaC02g26300D
			BnaA06g09730D	BnaC06g29840D
			BnaA06g09740D	BnaC06g29630D
			BnaA06g09830D	BnaC08g19370D
			BnaA06g10060D	BnaC04g29630D
			BnaA06g10090D	BnaA09g45400D
			BnaA06g10100D	BnaC06g04740D
			BnaA06g10110D	BnaA02g30830D
			BnaA06g10130D	BnaA02g30780D
			BnaA06g10230D	BnaCnng51860D
			BnaA06g10320D	BnaAnng22720D
			BnaA06g10600D	BnaC03g71670D
			BnaA06g11020D	BnaC03g71690D
			BnaA06g11250D	BnaAnng22920D
			BnaA06g11500D	BnaCnng52280D
			BnaA06g11510D	BnaCnng52390D
			BnaA06g11660D	BnaC03g27710D
			BnaA06g11790D	BnaC03g62640D
			BnaA06g12100D	BnaA09g27270D
			BnaA06g12310D	BnaA02g28670D
			BnaA06g12450D	BnaA02g28570D
			BnaA06g12600D	BnaA02g28390D
			BnaA06g12670D	BnaA01g24440D
			BnaA06g12720D	BnaA01g13670D
			BnaA06g12800D	BnaA01g13980D
			BnaA06g13200D	BnaA01g14040D
			BnaA06g13250D	BnaA01g14130D
			BnaA06g13380D	BnaA09g11040D
			BnaA06g13750D	BnaA09g11190D
			BnaA06g13900D	BnaA09g11220D
			BnaA06g13920D	BnaA09g11640D
			BnaA06g14350D	BnaA09g55090D
			BnaA06g14360D	BnaAnng23070D
			BnaA06g14590D	BnaCnng52700D
			BnaA06g14930D	BnaC04g12830D
			BnaA06g14950D	BnaA08g04820D
			BnaA06g14980D	BnaA08g04880D
			BnaA06g15280D	BnaC03g56510D
			BnaA06g15780D	BnaC03g56600D
			BnaA06g15930D	BnaC08g42010D
			BnaA06g16090D	BnaC08g42050D
			BnaA06g16170D	BnaC08g42160D
			BnaA06g16250D	BnaA01g33250D
			BnaA06g16430D	BnaA09g41460D
			BnaA06g16660D	BnaA09g41640D
			BnaA06g16930D	BnaA09g47830D
			BnaA06g17500D	BnaA09g48190D
			BnaA06g18410D	BnaA01g32550D
			BnaA06g18430D	BnaA01g32670D
			BnaA06g18550D	BnaA01g32830D
			BnaA06g19110D	BnaA01g27270D
			BnaA06g19150D	BnaAnng23230D
			BnaA06g19660D	BnaAnng23280D
			BnaA06g19800D	BnaA05g35760D
			BnaA06g20280D	BnaA07g37260D
			BnaA06g20570D	BnaA06g10520D
			BnaA06g20770D	BnaA06g10670D
			BnaA06g20790D	BnaA06g10860D
			BnaA06g21030D	BnaA06g10920D
			BnaA06g21480D	BnaA06g11230D
			BnaA06g21500D	BnaA06g11240D
			BnaA06g22530D	BnaA06g11350D
			BnaA06g22900D	BnaA09g18200D
			BnaA06g23120D	BnaA01g08340D
			BnaA06g23290D	BnaA01g08260D
			BnaA06g23600D	BnaA01g07830D
			BnaA06g23640D	BnaC03g59520D
			BnaA06g23800D	BnaC03g59290D
			BnaA06g24280D	BnaA04g15060D
			BnaA06g24500D	BnaC03g61980D
			BnaA06g24800D	BnaA05g16530D
			BnaA06g24940D	BnaA05g16480D
			BnaA06g25250D	BnaA05g16460D
			BnaA06g26030D	BnaA05g16450D
			BnaA06g26380D	BnaA05g16330D
			BnaA06g26420D	BnaCnng53170D
			BnaA06g27270D	BnaCnng53320D
			BnaA06g27640D	BnaAnng23610D
			BnaA06g28020D	BnaC01g21190D
			BnaA06g28280D	BnaC09g29820D
			BnaA06g28340D	BnaC02g09790D
			BnaA06g28570D	BnaC03g58470D
			BnaA06g28580D	BnaC03g58620D
			BnaA06g28600D	BnaA08g04590D
			BnaA06g28610D	BnaA08g04610D
			BnaA06g28870D	BnaC09g37480D
			BnaA06g28960D	BnaC09g37530D
			BnaA06g29460D	BnaC09g37690D
			BnaA06g29650D	BnaC09g37850D
			BnaA06g29980D	BnaC09g37960D
			BnaA06g30160D	BnaA07g00840D
			BnaA06g30290D	BnaA07g00800D
			BnaA06g30390D	BnaA07g00770D
			BnaA06g30490D	BnaA07g00650D
			BnaA06g30510D	BnaA05g30260D
			BnaA06g30560D	BnaA05g29710D
			BnaA06g30780D	BnaA05g29700D
			BnaA06g31160D	BnaA06g38550D
			BnaA06g31630D	BnaCnng53770D
			BnaA06g31640D	BnaCnng53830D
			BnaA06g32230D	BnaC02g48120D
			BnaA06g32910D	BnaA08g04420D
			BnaA06g32920D	BnaC03g41330D
			BnaA06g32950D	BnaA01g31470D
			BnaA06g33030D	BnaA01g31070D
			BnaA06g33260D	BnaA01g31000D
			BnaA06g33470D	BnaA01g30910D
			BnaA06g33790D	BnaC08g05120D
			BnaA06g34370D	BnaC08g05110D
			BnaA06g35050D	BnaC04g32930D
			BnaA06g35110D	BnaCnng54140D
			BnaA06g35210D	BnaC06g41070D
			BnaA06g35500D	BnaC06g41080D
			BnaA06g35510D	BnaC03g12790D
			BnaA06g35640D	BnaC03g12870D
			BnaA06g35830D	BnaC03g13130D
			BnaA06g35850D	BnaC03g13170D
			BnaA06g35970D	BnaC03g13250D
			BnaA06g36020D	BnaC03g13760D
			BnaA06g36160D	BnaC03g13770D
			BnaA06g36430D	BnaC03g13890D
			BnaA06g36970D	BnaC03g13910D
			BnaA06g37700D	BnaC03g14390D
			BnaA06g37880D	BnaAnng02010D
			BnaA06g38450D	BnaAnng02030D
			BnaA06g38600D	BnaC03g59670D
			BnaA06g38660D	BnaC03g60170D
			BnaA06g38950D	BnaC03g60280D
			BnaA06g39150D	BnaC04g11750D
			BnaA06g39160D	BnaC04g11800D
			BnaA06g39220D	BnaC04g11880D
			BnaA06g39230D	BnaC04g12350D
			BnaA06g39660D	BnaC04g12400D
			BnaA06g39850D	BnaC04g12610D
			BnaA06g40010D	BnaC04g12720D
			BnaA06g40080D	BnaA06g20140D
			BnaA06g40530D	BnaC08g08450D
			BnaA06g40740D	BnaC08g08440D
			BnaA06g40840D	BnaC08g09180D
			BnaA06g40990D	BnaC05g10150D
			BnaA07g00010D	BnaC05g10320D
			BnaA07g00230D	BnaC03g67910D
			BnaA07g00270D	BnaC03g48430D
			BnaA07g00340D	BnaC03g48550D
			BnaA07g00400D	BnaC03g48610D
			BnaA07g00440D	BnaC03g48620D
			BnaA07g00460D	BnaA06g09920D
			BnaA07g01020D	BnaA06g09970D
			BnaA07g01050D	BnaA06g10400D
			BnaA07g01060D	BnaC06g06580D
			BnaA07g01070D	BnaC06g06760D
			BnaA07g01100D	BnaC06g06830D
			BnaA07g01360D	BnaA07g04160D
			BnaA07g01450D	BnaA03g11600D
			BnaA07g02120D	BnaA03g11130D
			BnaA07g02340D	BnaC04g32060D
			BnaA07g02490D	BnaA06g38500D
			BnaA07g02670D	BnaA02g36860D
			BnaA07g03410D	BnaC08g09650D
			BnaA07g03430D	BnaC07g01100D
			BnaA07g03510D	BnaA04g26290D
			BnaA07g03650D	BnaA04g26380D
			BnaA07g03710D	BnaA04g26610D
			BnaA07g03730D	BnaC06g03630D
			BnaA07g03790D	BnaA02g24770D
			BnaA07g04240D	BnaC09g53890D
			BnaA07g04500D	BnaA09g08290D
			BnaA07g04790D	BnaA09g08530D
			BnaA07g04890D	BnaC08g45800D
			BnaA07g05160D	BnaC08g45810D
			BnaA07g05210D	BnaA05g33730D
			BnaA07g06150D	BnaA05g33810D
			BnaA07g06210D	BnaA05g33850D
			BnaA07g06310D	BnaA05g33860D
			BnaA07g06570D	BnaA05g34090D
			BnaA07g06750D	BnaA02g19770D
			BnaA07g06910D	BnaAnng24420D
			BnaA07g07270D	BnaAnng24570D
			BnaA07g07350D	BnaCnng55540D
			BnaA07g08040D	BnaUnng02300D
			BnaA07g08150D	BnaC04g30020D
			BnaA07g08180D	BnaA04g19410D
			BnaA07g08330D	BnaA04g19390D
			BnaA07g08440D	BnaC04g00350D
			BnaA07g09370D	BnaAnng04720D
			BnaA07g09990D	BnaAnng04760D
			BnaA07g10030D	BnaAnng04910D
			BnaA07g10070D	BnaAnng05100D
			BnaA07g10260D	BnaAnng05180D
			BnaA07g10470D	BnaA06g18910D
			BnaA07g10560D	BnaCnng08610D
			BnaA07g10580D	BnaCnng08730D
			BnaA07g11060D	BnaCnng08740D
			BnaA07g11080D	BnaCnng08930D
			BnaA07g11170D	BnaCnng09200D
			BnaA07g11250D	BnaCnng55860D
			BnaA07g11770D	BnaAnng24940D
			BnaA07g11920D	BnaC02g06490D
			BnaA07g12010D	BnaA09g11690D
			BnaA07g12140D	BnaA10g11070D
			BnaA07g12150D	BnaA10g11220D
			BnaA07g12310D	BnaA02g18280D
			BnaA07g12410D	BnaA02g18310D
			BnaA07g12570D	BnaA02g18470D
			BnaA07g13230D	BnaA02g18480D
			BnaA07g13260D	BnaA10g17240D
			BnaA07g13340D	BnaA10g16930D
			BnaA07g13900D	BnaCnng55990D
			BnaA07g14820D	BnaCnng56020D
			BnaA07g15010D	BnaAnng25070D
			BnaA07g15380D	BnaAnng25090D
			BnaA07g15590D	BnaC03g26900D
			BnaA07g15950D	BnaC03g26890D
			BnaA07g16120D	BnaA05g12750D
			BnaA07g16150D	BnaC06g30070D
			BnaA07g16290D	BnaC06g30160D
			BnaA07g16430D	BnaA05g19710D
			BnaA07g16520D	BnaA05g19640D
			BnaA07g16550D	BnaA05g19400D
			BnaA07g16820D	BnaC01g28060D
			BnaA07g17200D	BnaA07g28640D
			BnaA07g17240D	BnaA07g28740D
			BnaA07g17990D	BnaA03g12790D
			BnaA07g18330D	BnaCnng56240D
			BnaA07g18420D	BnaCnng56250D
			BnaA07g18440D	BnaCnng56400D
			BnaA07g18560D	BnaCnng56550D
			BnaA07g18600D	BnaCnng56560D
			BnaA07g18810D	BnaCnng56610D
			BnaA07g19250D	BnaA04g13420D
			BnaA07g19350D	BnaC07g18470D
			BnaA07g19360D	BnaC07g18460D
			BnaA07g19460D	BnaC01g27170D
			BnaA07g19910D	BnaC01g27320D
			BnaA07g20130D	BnaC01g34750D
			BnaA07g20360D	BnaA02g17230D
			BnaA07g20550D	BnaA02g17450D
			BnaA07g20750D	BnaA01g29560D
			BnaA07g21230D	BnaA01g29520D
			BnaA07g21470D	BnaA01g29460D
			BnaA07g21840D	BnaA01g29410D
			BnaA07g22060D	BnaA07g01380D
			BnaA07g22070D	BnaA07g01480D
			BnaA07g22310D	BnaA03g50070D
			BnaA07g22470D	BnaA03g50200D
			BnaA07g22640D	BnaA03g50490D
			BnaA07g22810D	BnaA03g50510D
			BnaA07g23080D	BnaA03g50540D
			BnaA07g23090D	BnaC06g27170D
			BnaA07g23310D	BnaCnng56890D
			BnaA07g23350D	BnaC05g52230D
			BnaA07g23360D	BnaAnng25560D
			BnaA07g23380D	BnaC05g10480D
			BnaA07g23490D	BnaC05g10390D
			BnaA07g23700D	BnaC05g10330D
			BnaA07g23790D	BnaC05g15310D
			BnaA07g24050D	BnaC05g15300D
			BnaA07g24110D	BnaC05g15250D
			BnaA07g24130D	BnaAnng05450D
			BnaA07g24200D	BnaC03g60720D
			BnaA07g24500D	BnaC03g60830D
			BnaA07g25010D	BnaC07g07150D
			BnaA07g25220D	BnaCnng09300D
			BnaA07g25550D	BnaCnng09500D
			BnaA07g25560D	BnaC05g11540D
			BnaA07g25800D	BnaC05g11590D
			BnaA07g25870D	BnaC05g11630D
			BnaA07g26260D	BnaC05g11880D
			BnaA07g26380D	BnaC02g44480D
			BnaA07g26450D	BnaCnng57190D
			BnaA07g26560D	BnaA04g07230D
			BnaA07g26700D	BnaC02g42890D
			BnaA07g26900D	BnaC02g42730D
			BnaA07g26920D	BnaA09g14910D
			BnaA07g27110D	BnaA09g15090D
			BnaA07g27120D	BnaC06g40210D
			BnaA07g27290D	BnaC05g12890D
			BnaA07g27300D	BnaC05g12780D
			BnaA07g28030D	BnaC06g05340D
			BnaA07g28280D	BnaAnng26060D
			BnaA07g28290D	BnaCnng57410D
			BnaA07g28420D	BnaCnng57480D
			BnaA07g28430D	BnaCnng57510D
			BnaA07g28440D	BnaCnng57580D
			BnaA07g28450D	BnaA09g34830D
			BnaA07g28460D	BnaA09g35060D
			BnaA07g28560D	BnaA07g09430D
			BnaA07g28710D	BnaA07g09350D
			BnaA07g28880D	BnaA07g09270D
			BnaA07g29150D	BnaA07g09050D
			BnaA07g29510D	BnaA10g27330D
			BnaA07g29530D	BnaA10g27270D
			BnaA07g29660D	BnaA10g27200D
			BnaA07g29680D	BnaA10g27170D
			BnaA07g29820D	BnaA02g26900D
			BnaA07g29900D	BnaA02g26910D
			BnaA07g29960D	BnaA04g20980D
			BnaA07g29970D	BnaA04g20540D
			BnaA07g30140D	BnaC01g19960D
			BnaA07g30180D	BnaAnng26270D
			BnaA07g30280D	BnaA02g12650D
			BnaA07g30490D	BnaA02g12660D
			BnaA07g30540D	BnaA02g13050D
			BnaA07g30680D	BnaA02g13200D
			BnaA07g31080D	BnaA02g13230D
			BnaA07g31190D	BnaA02g13300D
			BnaA07g31210D	BnaA02g13320D
			BnaA07g31220D	BnaA02g13610D
			BnaA07g31260D	BnaC04g29100D
			BnaA07g31400D	BnaC04g28800D
			BnaA07g32010D	BnaC07g16350D
			BnaA07g32020D	BnaC07g16230D
			BnaA07g32110D	BnaC07g15920D
			BnaA07g32310D	BnaC07g15910D
			BnaA07g32320D	BnaA09g13840D
			BnaA07g32440D	BnaA09g13710D
			BnaA07g32500D	BnaC07g03120D
			BnaA07g32620D	BnaA09g17750D
			BnaA07g32800D	BnaA09g17540D
			BnaA07g33060D	BnaA09g16910D
			BnaA07g33160D	BnaC04g26840D
			BnaA07g33180D	BnaC04g26290D
			BnaA07g33510D	BnaC04g26280D
			BnaA07g33570D	BnaC06g14070D
			BnaA07g33670D	BnaC06g13980D
			BnaA07g33680D	BnaA03g53210D
			BnaA07g33690D	BnaA03g53180D
			BnaA07g33730D	BnaAnng06020D
			BnaA07g33800D	BnaAnng06300D
			BnaA07g34080D	BnaC02g41630D
			BnaA07g34140D	BnaC02g41760D
			BnaA07g34180D	BnaC09g26140D
			BnaA07g34330D	BnaC06g30530D
			BnaA07g34630D	BnaC06g30580D
			BnaA07g34950D	BnaC06g30620D
			BnaA07g35260D	BnaC06g30650D
			BnaA07g36320D	BnaC06g30740D
			BnaA07g36390D	BnaC06g30760D
			BnaA07g36640D	BnaC09g54280D
			BnaA07g36760D	BnaAnng26550D
			BnaA07g36950D	BnaAnng26560D
			BnaA07g37120D	BnaC02g47760D
			BnaA07g37750D	BnaAnng26660D
			BnaA07g37770D	BnaA02g27880D
			BnaA07g37810D	BnaA02g27890D
			BnaA07g38210D	BnaA02g27980D
			BnaA07g38230D	BnaC05g14880D
			BnaA07g38350D	BnaA09g18630D
			BnaA07g38360D	BnaC05g10870D
			BnaA07g38390D	BnaA02g23460D
			BnaA07g38570D	BnaC08g26580D
			BnaA07g38640D	BnaC08g26550D
			BnaA07g38810D	BnaA01g12580D
			BnaA07g38870D	BnaA01g12540D
			BnaA07g38940D	BnaCnng58360D
			BnaA07g38970D	BnaCnng58420D
			BnaA07g39080D	BnaA01g32130D
			BnaA07g39230D	BnaA01g31810D
			BnaA08g00080D	BnaA01g31600D
			BnaA08g00270D	BnaC03g65170D
			BnaA08g00390D	BnaCnng10340D
			BnaA08g00760D	BnaCnng10600D
			BnaA08g01040D	BnaA08g20540D
			BnaA08g01300D	BnaA08g20760D
			BnaA08g01520D	BnaA06g22730D
			BnaA08g01860D	BnaC04g00760D
			BnaA08g02000D	BnaC04g00750D
			BnaA08g02360D	BnaC04g00600D
			BnaA08g02540D	BnaC05g43320D
			BnaA08g02760D	BnaC03g62520D
			BnaA08g02930D	BnaA09g15260D
			BnaA08g03640D	BnaA09g15360D
			BnaA08g04050D	BnaA09g15590D
			BnaA08g04090D	BnaAnng27100D
			BnaA08g04320D	BnaA08g07000D
			BnaA08g05570D	BnaA08g07200D
			BnaA08g05710D	BnaA08g07210D
			BnaA08g05860D	BnaC02g12160D
			BnaA08g06050D	BnaA08g06260D
			BnaA08g06670D	BnaA08g06180D
			BnaA08g06880D	BnaA08g06130D
			BnaA08g07320D	BnaC05g47100D
			BnaA08g07460D	BnaC05g47050D
			BnaA08g08190D	BnaC05g46990D
			BnaA08g08270D	BnaC05g46720D
			BnaA08g08310D	BnaC05g46620D
			BnaA08g08330D	BnaC04g00920D
			BnaA08g08460D	BnaC04g01000D
			BnaA08g08550D	BnaC04g01050D
			BnaA08g08780D	BnaC04g01130D
			BnaA08g09450D	BnaC04g01240D
			BnaA08g10990D	BnaC09g15360D
			BnaA08g11040D	BnaA05g11020D
			BnaA08g11080D	BnaAnng27220D
			BnaA08g11320D	BnaC01g40730D
			BnaA08g11360D	BnaCnng58980D
			BnaA08g11370D	BnaA09g28510D
			BnaA08g11390D	BnaC05g40920D
			BnaA08g11700D	BnaA01g25920D
			BnaA08g11760D	BnaC02g11770D
			BnaA08g11850D	BnaA09g15830D
			BnaA08g12190D	BnaA09g15890D
			BnaA08g12690D	BnaA09g16040D
			BnaA08g12730D	BnaA08g00380D
			BnaA08g12830D	BnaA08g00240D
			BnaA08g13170D	BnaA08g00140D
			BnaA08g13300D	BnaA06g39520D
			BnaA08g13440D	BnaCnng59250D
			BnaA08g13760D	BnaC08g10610D
			BnaA08g13860D	BnaA04g10530D
			BnaA08g13900D	BnaA04g10370D
			BnaA08g13940D	BnaC01g00070D
			BnaA08g13950D	BnaC01g00510D
			BnaA08g13960D	BnaA03g53560D
			BnaA08g14020D	BnaA03g48100D
			BnaA08g14150D	BnaA03g47670D
			BnaA08g14220D	BnaCnng59350D
			BnaA08g14290D	BnaA08g31670D
			BnaA08g14520D	BnaA10g30100D
			BnaA08g14710D	BnaC03g23940D
			BnaA08g14830D	BnaAnng06610D
			BnaA08g14930D	BnaCnng10710D
			BnaA08g15030D	BnaA01g18000D
			BnaA08g15060D	BnaC02g19720D
			BnaA08g15140D	BnaA03g11710D
			BnaA08g15240D	BnaA03g11720D
			BnaA08g15360D	BnaCnng10720D
			BnaA08g15510D	BnaCnng10760D
			BnaA08g15540D	BnaCnng10870D
			BnaA08g15660D	BnaAnng27790D
			BnaA08g15760D	BnaC05g36760D
			BnaA08g15810D	BnaA05g32660D
			BnaA08g15870D	BnaA05g32540D
			BnaA08g16070D	BnaA05g32280D
			BnaA08g16080D	BnaCnng11060D
			BnaA08g16100D	BnaA07g07560D
			BnaA08g16530D	BnaC08g04910D
			BnaA08g16610D	BnaC08g04940D
			BnaA08g16640D	BnaC05g48370D
			BnaA08g16940D	BnaC06g01680D
			BnaA08g17070D	BnaC03g58800D
			BnaA08g17260D	BnaA01g30320D
			BnaA08g17480D	BnaCnng59870D
			BnaA08g17880D	BnaCnng59900D
			BnaA08g18030D	BnaCnng59950D
			BnaA08g18040D	BnaC03g75340D
			BnaA08g18080D	BnaC07g14870D
			BnaA08g18350D	BnaC07g14890D
			BnaA08g18380D	BnaAnng07120D
			BnaA08g18550D	BnaAnng07140D
			BnaA08g18670D	BnaAnng07170D
			BnaA08g18790D	BnaC08g10940D
			BnaA08g18960D	BnaA01g21380D
			BnaA08g19000D	BnaA01g07480D
			BnaA08g19010D	BnaA01g07190D
			BnaA08g19140D	BnaA01g06940D
			BnaA08g19240D	BnaC02g16540D
			BnaA08g19280D	BnaA04g20490D
			BnaA08g19370D	BnaA04g20170D
			BnaA08g19380D	BnaA04g20160D
			BnaA08g19490D	BnaA04g20150D
			BnaA08g19680D	BnaA04g28960D
			BnaA08g19980D	BnaAnng07370D
			BnaA08g20570D	BnaAnng07430D
			BnaA08g20800D	BnaAnng07610D
			BnaA08g20900D	BnaA06g22920D
			BnaA08g20980D	BnaA06g23190D
			BnaA08g21450D	BnaA06g23320D
			BnaA08g21470D	BnaC09g33800D
			BnaA08g21510D	BnaC09g33700D
			BnaA08g21520D	BnaC09g33650D
			BnaA08g22070D	BnaC04g21740D
			BnaA08g22130D	BnaC04g21720D
			BnaA08g22410D	BnaA02g36840D
			BnaA08g22520D	BnaA03g51280D
			BnaA08g22590D	BnaA03g51550D
			BnaA08g22790D	BnaA03g51560D
			BnaA08g22880D	BnaA03g51740D
			BnaA08g22890D	BnaA03g52000D
			BnaA08g23060D	BnaA03g52200D
			BnaA08g23130D	BnaC02g23520D
			BnaA08g23190D	BnaC02g23620D
			BnaA08g23510D	BnaA06g33450D
			BnaA08g23540D	BnaA06g33160D
			BnaA08g23710D	BnaA06g33010D
			BnaA08g23770D	BnaA06g32990D
			BnaA08g23820D	BnaA06g32820D
			BnaA08g24040D	BnaA06g32810D
			BnaA08g24130D	BnaA06g32740D
			BnaA08g24230D	BnaA06g32690D
			BnaA08g24500D	BnaA06g32600D
			BnaA08g24770D	BnaA06g32410D
			BnaA08g25140D	BnaA06g32030D
			BnaA08g25420D	BnaA06g31910D
			BnaA08g25590D	BnaA06g31900D
			BnaA08g25870D	BnaA09g43110D
			BnaA08g26040D	BnaA09g43230D
			BnaA08g26050D	BnaA09g43710D
			BnaA08g26140D	BnaC09g39180D
			BnaA08g26210D	BnaC09g39160D
			BnaA08g26240D	BnaC09g39020D
			BnaA08g26270D	BnaC09g39010D
			BnaA08g26320D	BnaC09g38450D
			BnaA08g26700D	BnaA08g13520D
			BnaA08g26890D	BnaA08g13530D
			BnaA08g27430D	BnaA08g13880D
			BnaA08g27620D	BnaA08g14090D
			BnaA08g27790D	BnaA10g07350D
			BnaA08g27920D	BnaA10g07120D
			BnaA08g28350D	BnaA10g07110D
			BnaA08g28740D	BnaA10g06980D
			BnaA08g29050D	BnaA10g06750D
			BnaA08g29360D	BnaA10g06740D
			BnaA08g29940D	BnaC03g21920D
			BnaA08g30370D	BnaC03g21850D
			BnaA08g30400D	BnaC03g21670D
			BnaA08g30710D	BnaC03g21610D
			BnaA08g30820D	BnaC03g21170D
			BnaA08g31010D	BnaC03g49360D
			BnaA08g31310D	BnaC03g49150D
			BnaA08g31360D	BnaC03g48900D
			BnaA08g31400D	BnaA02g24350D
			BnaA08g31640D	BnaA05g26010D
			BnaA08g31680D	BnaA05g26040D
			BnaA09g00390D	BnaA05g26210D
			BnaA09g00450D	BnaA08g15490D
			BnaA09g00670D	BnaA02g14440D
			BnaA09g00960D	BnaA01g13280D
			BnaA09g01150D	BnaA09g31220D
			BnaA09g01230D	BnaC01g22200D
			BnaA09g01710D	BnaC05g15430D
			BnaA09g01960D	BnaC03g24230D
			BnaA09g02250D	BnaCnng60610D
			BnaA09g02360D	BnaA01g34930D
			BnaA09g02410D	BnaAnng28440D
			BnaA09g02760D	BnaC05g30740D
			BnaA09g02800D	BnaC05g30670D
			BnaA09g02810D	BnaC05g30650D
			BnaA09g02840D	BnaC05g30570D
			BnaA09g03130D	BnaA02g29830D
			BnaA09g03140D	BnaA02g29640D
			BnaA09g03160D	BnaC07g24760D
			BnaA09g03170D	BnaC07g24800D
			BnaA09g03360D	BnaCnng11290D
			BnaA09g03590D	BnaC01g10330D
			BnaA09g03700D	BnaCnng11470D
			BnaA09g03720D	BnaA04g10090D
			BnaA09g03840D	BnaC04g06350D
			BnaA09g03890D	BnaC04g06220D
			BnaA09g04430D	BnaA08g06760D
			BnaA09g05110D	BnaA05g29390D
			BnaA09g05420D	BnaA05g29350D
			BnaA09g05570D	BnaA05g29260D
			BnaA09g05620D	BnaA05g29110D
			BnaA09g06070D	BnaA05g28900D
			BnaA09g06550D	BnaC09g22390D
			BnaA09g06730D	BnaC09g22380D
			BnaA09g06940D	BnaC09g22280D
			BnaA09g07140D	BnaC02g01060D
			BnaA09g07410D	BnaC02g00740D
			BnaA09g07450D	BnaCnng11920D
			BnaA09g08210D	BnaC09g50790D
			BnaA09g08410D	BnaA02g13970D
			BnaA09g08480D	BnaA02g04150D
			BnaA09g09000D	BnaA02g04200D
			BnaA09g09100D	BnaA02g04250D
			BnaA09g09160D	BnaA08g02310D
			BnaA09g09190D	BnaA02g05040D
			BnaA09g09210D	BnaC06g06480D
			BnaA09g09350D	BnaC01g42060D
			BnaA09g09870D	BnaA09g14330D
			BnaA09g09920D	BnaA06g34020D
			BnaA09g09950D	BnaA06g34070D
			BnaA09g09970D	BnaA07g12590D
			BnaA09g10040D	BnaA07g12480D
			BnaA09g10380D	BnaA06g09650D
			BnaA09g10740D	BnaA09g12590D
			BnaA09g11240D	BnaA07g31810D
			BnaA09g11290D	BnaA07g31840D
			BnaA09g11460D	BnaA07g32040D
			BnaA09g11500D	BnaAnng29010D
			BnaA09g11950D	BnaCnng61360D
			BnaA09g12000D	BnaA05g12690D
			BnaA09g12040D	BnaA05g12530D
			BnaA09g12220D	BnaA05g12410D
			BnaA09g12330D	BnaA05g12390D
			BnaA09g12410D	BnaC09g21500D
			BnaA09g12540D	BnaCnng13420D
			BnaA09g12550D	BnaCnng13690D
			BnaA09g12710D	BnaC02g35140D
			BnaA09g12900D	BnaCnng61540D
			BnaA09g13040D	BnaAnng29200D
			BnaA09g13280D	BnaC02g42280D
			BnaA09g13800D	BnaC02g42260D
			BnaA09g14900D	BnaC03g16200D
			BnaA09g14960D	BnaC03g16230D
			BnaA09g15190D	BnaA02g14110D
			BnaA09g15700D	BnaAnng07940D
			BnaA09g16160D	BnaC06g10060D
			BnaA09g16170D	BnaCnng61810D
			BnaA09g16470D	BnaA07g37570D
			BnaA09g16520D	BnaA04g14220D
			BnaA09g16540D	BnaA05g20490D
			BnaA09g16830D	BnaA01g23160D
			BnaA09g16980D	BnaA07g03600D
			BnaA09g17030D	BnaA08g30000D
			BnaA09g17090D	BnaC05g50600D
			BnaA09g17360D	BnaC05g21730D
			BnaA09g17390D	BnaC01g31600D
			BnaA09g17400D	BnaA09g19870D
			BnaA09g17870D	BnaA08g06530D
			BnaA09g17930D	BnaA08g06520D
			BnaA09g18000D	BnaA08g06380D
			BnaA09g18040D	BnaC09g11040D
			BnaA09g18210D	BnaCnng62610D
			BnaA09g18530D	BnaAnng29810D
			BnaA09g18570D	BnaC02g24980D
			BnaA09g18790D	BnaC04g47560D
			BnaA09g19500D	BnaC04g47850D
			BnaA09g19550D	BnaC04g47910D
			BnaA09g19570D	BnaC04g47920D
			BnaA09g19630D	BnaC04g48170D
			BnaA09g19730D	BnaC04g48440D
			BnaA09g20070D	BnaC04g48600D
			BnaA09g20820D	BnaA02g22320D
			BnaA09g21330D	BnaA10g09070D
			BnaA09g21840D	BnaA10g08930D
			BnaA09g21860D	BnaA10g08850D
			BnaA09g22280D	BnaA10g08760D
			BnaA09g22290D	BnaA10g08750D
			BnaA09g22500D	BnaC03g44110D
			BnaA09g22530D	BnaC03g44450D
			BnaA09g22620D	BnaC03g44730D
			BnaA09g22830D	BnaC05g00140D
			BnaA09g23350D	BnaC05g00300D
			BnaA09g23510D	BnaC05g00470D
			BnaA09g24140D	BnaC05g00640D
			BnaA09g24320D	BnaC05g00660D
			BnaA09g24370D	BnaC05g00820D
			BnaA09g24740D	BnaC05g00830D
			BnaA09g24870D	BnaC05g01270D
			BnaA09g26150D	BnaC05g01440D
			BnaA09g26310D	BnaC05g01450D
			BnaA09g26420D	BnaC06g07730D
			BnaA09g27140D	BnaC06g07740D
			BnaA09g27480D	BnaC04g43040D
			BnaA09g27780D	BnaC04g42170D
			BnaA09g27900D	BnaA08g01780D
			BnaA09g27910D	BnaCnng14120D
			BnaA09g27920D	BnaCnng14300D
			BnaA09g28080D	BnaA09g27410D
			BnaA09g28200D	BnaC07g42090D
			BnaA09g28400D	BnaC07g42120D
			BnaA09g28450D	BnaCnng62710D
			BnaA09g28470D	BnaC02g43350D
			BnaA09g28670D	BnaC01g27750D
			BnaA09g28870D	BnaA09g12770D
			BnaA09g29100D	BnaA09g12720D
			BnaA09g29190D	BnaA02g33010D
			BnaA09g29200D	BnaA02g32890D
			BnaA09g29210D	BnaA02g32880D
			BnaA09g29540D	BnaC02g42020D
			BnaA09g29750D	BnaAnng30020D
			BnaA09g29790D	BnaAnng08260D
			BnaA09g29970D	BnaC03g64330D
			BnaA09g30020D	BnaAnng08490D
			BnaA09g30100D	BnaAnng08520D
			BnaA09g30340D	BnaAnng08730D
			BnaA09g30480D	BnaAnng08760D
			BnaA09g30590D	BnaC09g14630D
			BnaA09g30630D	BnaC09g14690D
			BnaA09g30730D	BnaA02g29390D
			BnaA09g30920D	BnaCnng63240D
			BnaA09g30950D	BnaA10g03550D
			BnaA09g31060D	BnaC04g29780D
			BnaA09g31440D	BnaA06g38980D
			BnaA09g31660D	BnaCnng14630D
			BnaA09g31670D	BnaCnng14720D
			BnaA09g31740D	BnaCnng14990D
			BnaA09g32350D	BnaCnng15140D
			BnaA09g32480D	BnaCnng15190D
			BnaA09g32800D	BnaCnng15230D
			BnaA09g33010D	BnaAnng30260D
			BnaA09g33030D	BnaCnng63340D
			BnaA09g33140D	BnaAnng08970D
			BnaA09g33290D	BnaAnng08980D
			BnaA09g33320D	BnaAnng09220D
			BnaA09g33390D	BnaC03g69350D
			BnaA09g33440D	BnaC03g69280D
			BnaA09g33730D	BnaA01g22670D
			BnaA09g33880D	BnaA01g13510D
			BnaA09g33960D	BnaC05g18870D
			BnaA09g34030D	BnaA10g03990D
			BnaA09g34080D	BnaA02g16610D
			BnaA09g34290D	BnaC07g41750D
			BnaA09g34470D	BnaAnng30540D
			BnaA09g34900D	BnaCnng63770D
			BnaA09g35340D	BnaC06g00560D
			BnaA09g35370D	BnaA09g12210D
			BnaA09g35490D	BnaA09g12260D
			BnaA09g35540D	BnaA09g12280D
			BnaA09g35660D	BnaA07g14200D
			BnaA09g35780D	BnaAnng30640D
			BnaA09g35790D	BnaC08g46180D
			BnaA09g36140D	BnaA02g08300D
			BnaA09g36180D	BnaA02g08170D
			BnaA09g36350D	BnaA04g24600D
			BnaA09g36600D	BnaA04g26780D
			BnaA09g36710D	BnaA02g16360D
			BnaA09g36720D	BnaA02g16390D
			BnaA09g36760D	BnaA09g23020D
			BnaA09g36870D	BnaA09g22980D
			BnaA09g36930D	BnaA06g33550D
			BnaA09g37410D	BnaC06g02510D
			BnaA09g37460D	BnaCnng15830D
			BnaA09g37590D	BnaA06g16800D
			BnaA09g37890D	BnaA04g15640D
			BnaA09g38040D	BnaCnng16050D
			BnaA09g38160D	BnaA07g03890D
			BnaA09g38220D	BnaA05g10840D
			BnaA09g38280D	BnaC01g31470D
			BnaA09g38330D	BnaC04g53090D
			BnaA09g38730D	BnaC05g13520D
			BnaA09g38860D	BnaC05g13670D
			BnaA09g39120D	BnaC05g13730D
			BnaA09g39450D	BnaA08g27360D
			BnaA09g39760D	BnaA08g27510D
			BnaA09g40090D	BnaA08g27540D
			BnaA09g40160D	BnaA08g27840D
			BnaA09g40670D	BnaA08g27870D
			BnaA09g40810D	BnaA08g28510D
			BnaA09g40900D	BnaA08g28590D
			BnaA09g41320D	BnaA08g28710D
			BnaA09g42030D	BnaA08g28810D
			BnaA09g42050D	BnaA08g28830D
			BnaA09g42280D	BnaA08g28900D
			BnaA09g42450D	BnaA07g08020D
			BnaA09g42640D	BnaA07g08880D
			BnaA09g43000D	BnaC02g34120D
			BnaA09g43060D	BnaA04g12130D
			BnaA09g43510D	BnaA04g11570D
			BnaA09g43600D	BnaC08g41560D
			BnaA09g43610D	BnaC08g41390D
			BnaA09g43690D	BnaC08g41370D
			BnaA09g43720D	BnaC08g41300D
			BnaA09g44000D	BnaC08g41210D
			BnaA09g44030D	BnaC08g40850D
			BnaA09g44200D	BnaC08g40320D
			BnaA09g44230D	BnaC08g39940D
			BnaA09g44360D	BnaA09g28740D
			BnaA09g44520D	BnaA09g28860D
			BnaA09g44610D	BnaA09g29600D
			BnaA09g44710D	BnaC01g23020D
			BnaA09g44800D	BnaC01g23030D
			BnaA09g45320D	BnaC01g23210D
			BnaA09g45370D	BnaC01g23360D
			BnaA09g45380D	BnaA02g12010D
			BnaA09g45620D	BnaA02g12030D
			BnaA09g45860D	BnaA02g12480D
			BnaA09g46020D	BnaA08g03050D
			BnaA09g46820D	BnaA08g02730D
			BnaA09g47540D	BnaA08g02530D
			BnaA09g47910D	BnaA08g02520D
			BnaA09g48300D	BnaC05g13240D
			BnaA09g48320D	BnaC05g13250D
			BnaA09g48400D	BnaC05g13400D
			BnaA09g48830D	BnaC05g13480D
			BnaA09g49000D	BnaA09g00250D
			BnaA09g49150D	BnaA09g00200D
			BnaA09g49160D	BnaA09g00080D
			BnaA09g49190D	BnaC04g43190D
			BnaA09g49220D	BnaC04g43070D
			BnaA09g49320D	BnaC06g18710D
			BnaA09g49730D	BnaA09g01560D
			BnaA09g49950D	BnaA01g07620D
			BnaA09g50010D	BnaA01g07610D
			BnaA09g50230D	BnaC09g20680D
			BnaA09g50580D	BnaC09g20640D
			BnaA09g50790D	BnaCnng16660D
			BnaA09g50870D	BnaAnng31150D
			BnaA09g50900D	BnaCnng64660D
			BnaA09g51180D	BnaA09g10030D
			BnaA09g51450D	BnaA02g24310D
			BnaA09g51520D	BnaA05g20710D
			BnaA09g51640D	BnaC02g34050D
			BnaA09g51830D	BnaA05g35790D
			BnaA09g52020D	BnaA09g39100D
			BnaA09g52100D	BnaA04g10780D
			BnaA09g52240D	BnaAnng31420D
			BnaA09g52440D	BnaA02g28200D
			BnaA09g52830D	BnaA02g28150D
			BnaA09g53020D	BnaAnng10160D
			BnaA09g53100D	BnaAnng10190D
			BnaA09g53390D	BnaC05g48870D
			BnaA09g53430D	BnaA06g09160D
			BnaA09g53510D	BnaA06g08980D
			BnaA09g54140D	BnaA09g25140D
			BnaA09g54470D	BnaA07g01630D
			BnaA09g54750D	BnaA07g01610D
			BnaA09g54810D	BnaA07g01530D
			BnaA09g54920D	BnaAnng31630D
			BnaA09g55020D	BnaA05g33080D
			BnaA09g55050D	BnaA05g33180D
			BnaA09g55070D	BnaA08g29910D
			BnaA09g55200D	BnaA08g29920D
			BnaA09g55440D	BnaA03g50620D
			BnaA09g55490D	BnaC01g40760D
			BnaA09g55590D	BnaC04g54810D
			BnaA09g55770D	BnaCnng17400D
			BnaA09g55980D	BnaC07g18140D
			BnaA09g56020D	BnaCnng65810D
			BnaA09g56510D	BnaAnng31970D
			BnaA09g56580D	BnaCnng17860D
			BnaA09g56900D	BnaC09g41210D
			BnaA09g57180D	BnaC03g61160D
			BnaA10g00280D	BnaC03g61150D
			BnaA10g00350D	BnaA02g27270D
			BnaA10g00360D	BnaA10g11590D
			BnaA10g00470D	BnaA02g29020D
			BnaA10g00720D	BnaA02g29010D
			BnaA10g01020D	BnaCnng18030D
			BnaA10g01100D	BnaC06g04530D
			BnaA10g01380D	BnaCnng18230D
			BnaA10g01420D	BnaC01g34650D
			BnaA10g01440D	BnaA02g16070D
			BnaA10g01450D	BnaA05g14890D
			BnaA10g01460D	BnaA05g14880D
			BnaA10g01980D	BnaCnng18390D
			BnaA10g02510D	BnaCnng18570D
			BnaA10g02610D	BnaAnng32240D
			BnaA10g02770D	BnaUnng03570D
			BnaA10g03070D	BnaC09g37250D
			BnaA10g03720D	BnaC09g37030D
			BnaA10g03740D	BnaC09g36910D
			BnaA10g04120D	BnaC09g36750D
			BnaA10g04200D	BnaC09g36730D
			BnaA10g04280D	BnaC09g36720D
			BnaA10g04480D	BnaC09g36680D
			BnaA10g04540D	BnaC09g36570D
			BnaA10g04620D	BnaA09g20050D
			BnaA10g04640D	BnaA09g20060D
			BnaA10g04660D	BnaA09g20220D
			BnaA10g04700D	BnaA09g20320D
			BnaA10g05030D	BnaA09g20510D
			BnaA10g05050D	BnaA09g20620D
			BnaA10g05370D	BnaA09g20670D
			BnaA10g05740D	BnaA09g20790D
			BnaA10g05750D	BnaA09g06610D
			BnaA10g06630D	BnaA09g06560D
			BnaA10g06850D	BnaA09g06230D
			BnaA10g07430D	BnaA09g05910D
			BnaA10g07550D	BnaA09g05780D
			BnaA10g07720D	BnaA09g05710D
			BnaA10g07870D	BnaA09g05440D
			BnaA10g07910D	BnaA09g05120D
			BnaA10g08220D	BnaA09g05090D
			BnaA10g08330D	BnaC09g40420D
			BnaA10g08420D	BnaC09g40920D
			BnaA10g08870D	BnaC09g41100D
			BnaA10g09040D	BnaA05g10680D
			BnaA10g09090D	BnaA05g10650D
			BnaA10g09110D	BnaA05g09410D
			BnaA10g09200D	BnaA05g09400D
			BnaA10g09270D	BnaA05g09180D
			BnaA10g09370D	BnaA10g09190D
			BnaA10g09400D	BnaA10g09660D
			BnaA10g09440D	BnaA10g09770D
			BnaA10g09640D	BnaA10g09890D
			BnaA10g09670D	BnaA10g10400D
			BnaA10g10590D	BnaC09g20970D
			BnaA10g10840D	BnaC03g65930D
			BnaA10g10930D	BnaC03g65700D
[truncated: 2,389 more rows]
