# Supplementary material for: Analysis of Tissue-Specific Defense Responses to Sclerotinia sclerotiorum in Brassica napus
Source: Plants (Basel). 2022 Jul 31;11(15):2001. doi: 10.3390/plants11152001 (PMC9370628; doi:10.3390/plants11152001)
Supplement: Supplementary file 1 [file plants-11-02001-s001.zip › plants-1826220-supplementary/Table S2.xlsx]

## Sheet: Sheet1
Supplementary table 1 - Gene list of up-REG and down-REG in LI experiment
R-line			S-line
up-REG	down-REG		up-REG	down-REG
BnaA01g00060D	BnaA01g00020D		BnaA01g00060D	BnaA01g00020D
BnaA01g00110D	BnaA01g00050D		BnaA01g00190D	BnaA01g00050D
BnaA01g00190D	BnaA01g00120D		BnaA01g00260D	BnaA01g00080D
BnaA01g00260D	BnaA01g00130D		BnaA01g00310D	BnaA01g00120D
BnaA01g00310D	BnaA01g00140D		BnaA01g00340D	BnaA01g00140D
BnaA01g00340D	BnaA01g00170D		BnaA01g00410D	BnaA01g00170D
BnaA01g00360D	BnaA01g00180D		BnaA01g00580D	BnaA01g00210D
BnaA01g00580D	BnaA01g00210D		BnaA01g00630D	BnaA01g00270D
BnaA01g00630D	BnaA01g00270D		BnaA01g00690D	BnaA01g00280D
BnaA01g00640D	BnaA01g00280D		BnaA01g00740D	BnaA01g00290D
BnaA01g00690D	BnaA01g00380D		BnaA01g00860D	BnaA01g00370D
BnaA01g00740D	BnaA01g00390D		BnaA01g00900D	BnaA01g00380D
BnaA01g00860D	BnaA01g00400D		BnaA01g01010D	BnaA01g00390D
BnaA01g00900D	BnaA01g00420D		BnaA01g01070D	BnaA01g00400D
BnaA01g01010D	BnaA01g00430D		BnaA01g01220D	BnaA01g00420D
BnaA01g01040D	BnaA01g00440D		BnaA01g01260D	BnaA01g00450D
BnaA01g01080D	BnaA01g00450D		BnaA01g01330D	BnaA01g00470D
BnaA01g01090D	BnaA01g00480D		BnaA01g01400D	BnaA01g00600D
BnaA01g01100D	BnaA01g00510D		BnaA01g01470D	BnaA01g00610D
BnaA01g01220D	BnaA01g00520D		BnaA01g01510D	BnaA01g00670D
BnaA01g01330D	BnaA01g00570D		BnaA01g01560D	BnaA01g00680D
BnaA01g01400D	BnaA01g00600D		BnaA01g01620D	BnaA01g00710D
BnaA01g01410D	BnaA01g00610D		BnaA01g01680D	BnaA01g00850D
BnaA01g01470D	BnaA01g00760D		BnaA01g01870D	BnaA01g00870D
BnaA01g01510D	BnaA01g00780D		BnaA01g01880D	BnaA01g00930D
BnaA01g01560D	BnaA01g00790D		BnaA01g01930D	BnaA01g00950D
BnaA01g01620D	BnaA01g00800D		BnaA01g02040D	BnaA01g00960D
BnaA01g01650D	BnaA01g00850D		BnaA01g02160D	BnaA01g00980D
BnaA01g01680D	BnaA01g00870D		BnaA01g02190D	BnaA01g01000D
BnaA01g01780D	BnaA01g00890D		BnaA01g02290D	BnaA01g01210D
BnaA01g01830D	BnaA01g00930D		BnaA01g02300D	BnaA01g01240D
BnaA01g01850D	BnaA01g00960D		BnaA01g02450D	BnaA01g01370D
BnaA01g01870D	BnaA01g00970D		BnaA01g02490D	BnaA01g01420D
BnaA01g01880D	BnaA01g00980D		BnaA01g02500D	BnaA01g01430D
BnaA01g01890D	BnaA01g00990D		BnaA01g02570D	BnaA01g01480D
BnaA01g01910D	BnaA01g01000D		BnaA01g02670D	BnaA01g01490D
BnaA01g01930D	BnaA01g01020D		BnaA01g02720D	BnaA01g01540D
BnaA01g01970D	BnaA01g01030D		BnaA01g02830D	BnaA01g01550D
BnaA01g02010D	BnaA01g01120D		BnaA01g02900D	BnaA01g01590D
BnaA01g02040D	BnaA01g01210D		BnaA01g02930D	BnaA01g01630D
BnaA01g02090D	BnaA01g01250D		BnaA01g03010D	BnaA01g01640D
BnaA01g02160D	BnaA01g01270D		BnaA01g03040D	BnaA01g01690D
BnaA01g02180D	BnaA01g01360D		BnaA01g03080D	BnaA01g01780D
BnaA01g02190D	BnaA01g01420D		BnaA01g03120D	BnaA01g01790D
BnaA01g02230D	BnaA01g01430D		BnaA01g03130D	BnaA01g01800D
BnaA01g02290D	BnaA01g01500D		BnaA01g03220D	BnaA01g01810D
BnaA01g02430D	BnaA01g01540D		BnaA01g03260D	BnaA01g01910D
BnaA01g02450D	BnaA01g01550D		BnaA01g03320D	BnaA01g01980D
BnaA01g02490D	BnaA01g01570D		BnaA01g03390D	BnaA01g01990D
BnaA01g02500D	BnaA01g01630D		BnaA01g03470D	BnaA01g02060D
BnaA01g02570D	BnaA01g01660D		BnaA01g03510D	BnaA01g02070D
BnaA01g02660D	BnaA01g01690D		BnaA01g03520D	BnaA01g02130D
BnaA01g02670D	BnaA01g01790D		BnaA01g03530D	BnaA01g02220D
BnaA01g02800D	BnaA01g01800D		BnaA01g03660D	BnaA01g02370D
BnaA01g02830D	BnaA01g01810D		BnaA01g03870D	BnaA01g02420D
BnaA01g02890D	BnaA01g01960D		BnaA01g03980D	BnaA01g02440D
BnaA01g02900D	BnaA01g01980D		BnaA01g04020D	BnaA01g02460D
BnaA01g02930D	BnaA01g01990D		BnaA01g04150D	BnaA01g02510D
BnaA01g03010D	BnaA01g02050D		BnaA01g04220D	BnaA01g02540D
BnaA01g03060D	BnaA01g02070D		BnaA01g04350D	BnaA01g02600D
BnaA01g03080D	BnaA01g02080D		BnaA01g04410D	BnaA01g02620D
BnaA01g03130D	BnaA01g02150D		BnaA01g04520D	BnaA01g02630D
BnaA01g03150D	BnaA01g02220D		BnaA01g04530D	BnaA01g02710D
BnaA01g03220D	BnaA01g02270D		BnaA01g04540D	BnaA01g02810D
BnaA01g03320D	BnaA01g02370D		BnaA01g04580D	BnaA01g02860D
BnaA01g03390D	BnaA01g02440D		BnaA01g04610D	BnaA01g02910D
BnaA01g03400D	BnaA01g02460D		BnaA01g04620D	BnaA01g02920D
BnaA01g03510D	BnaA01g02530D		BnaA01g04790D	BnaA01g02940D
BnaA01g03520D	BnaA01g02540D		BnaA01g04860D	BnaA01g03180D
BnaA01g03530D	BnaA01g02550D		BnaA01g04880D	BnaA01g03200D
BnaA01g03600D	BnaA01g02590D		BnaA01g05040D	BnaA01g03240D
BnaA01g03640D	BnaA01g02600D		BnaA01g05090D	BnaA01g03310D
BnaA01g03660D	BnaA01g02610D		BnaA01g05130D	BnaA01g03330D
BnaA01g04020D	BnaA01g02620D		BnaA01g05220D	BnaA01g03340D
BnaA01g04110D	BnaA01g02650D		BnaA01g05280D	BnaA01g03410D
BnaA01g04120D	BnaA01g02710D		BnaA01g05390D	BnaA01g03460D
BnaA01g04150D	BnaA01g02810D		BnaA01g05480D	BnaA01g03550D
BnaA01g04200D	BnaA01g02860D		BnaA01g05550D	BnaA01g03570D
BnaA01g04220D	BnaA01g02880D		BnaA01g05610D	BnaA01g03580D
BnaA01g04310D	BnaA01g02910D		BnaA01g05630D	BnaA01g03590D
BnaA01g04340D	BnaA01g02940D		BnaA01g05920D	BnaA01g03620D
BnaA01g04350D	BnaA01g03070D		BnaA01g06010D	BnaA01g03740D
BnaA01g04410D	BnaA01g03090D		BnaA01g06110D	BnaA01g03840D
BnaA01g04430D	BnaA01g03200D		BnaA01g06120D	BnaA01g03860D
BnaA01g04440D	BnaA01g03240D		BnaA01g06170D	BnaA01g03880D
BnaA01g04520D	BnaA01g03270D		BnaA01g06210D	BnaA01g03900D
BnaA01g04530D	BnaA01g03300D		BnaA01g06270D	BnaA01g03920D
BnaA01g04540D	BnaA01g03330D		BnaA01g06350D	BnaA01g04000D
BnaA01g04570D	BnaA01g03340D		BnaA01g06410D	BnaA01g04010D
BnaA01g04580D	BnaA01g03370D		BnaA01g06530D	BnaA01g04120D
BnaA01g04610D	BnaA01g03410D		BnaA01g06540D	BnaA01g04160D
BnaA01g04620D	BnaA01g03460D		BnaA01g06620D	BnaA01g04280D
BnaA01g04700D	BnaA01g03480D		BnaA01g06680D	BnaA01g04300D
BnaA01g04770D	BnaA01g03550D		BnaA01g06800D	BnaA01g04330D
BnaA01g04850D	BnaA01g03560D		BnaA01g06820D	BnaA01g04450D
BnaA01g04860D	BnaA01g03570D		BnaA01g06860D	BnaA01g04460D
BnaA01g04880D	BnaA01g03580D		BnaA01g07000D	BnaA01g04550D
BnaA01g04890D	BnaA01g03650D		BnaA01g07130D	BnaA01g04640D
BnaA01g04930D	BnaA01g03680D		BnaA01g07170D	BnaA01g04650D
BnaA01g04990D	BnaA01g03780D		BnaA01g07270D	BnaA01g04660D
BnaA01g05040D	BnaA01g03800D		BnaA01g07330D	BnaA01g04670D
BnaA01g05060D	BnaA01g03830D		BnaA01g07340D	BnaA01g04680D
BnaA01g05090D	BnaA01g03840D		BnaA01g07360D	BnaA01g04710D
BnaA01g05100D	BnaA01g03860D		BnaA01g07420D	BnaA01g04720D
BnaA01g05130D	BnaA01g03880D		BnaA01g07450D	BnaA01g04740D
BnaA01g05220D	BnaA01g03890D		BnaA01g07860D	BnaA01g04750D
BnaA01g05280D	BnaA01g03910D		BnaA01g07920D	BnaA01g04800D
BnaA01g05300D	BnaA01g03930D		BnaA01g07970D	BnaA01g04970D
BnaA01g05390D	BnaA01g04000D		BnaA01g07980D	BnaA01g05010D
BnaA01g05420D	BnaA01g04010D		BnaA01g08000D	BnaA01g05170D
BnaA01g05610D	BnaA01g04040D		BnaA01g08010D	BnaA01g05190D
BnaA01g05620D	BnaA01g04130D		BnaA01g08360D	BnaA01g05270D
BnaA01g05630D	BnaA01g04290D		BnaA01g08500D	BnaA01g05410D
BnaA01g05780D	BnaA01g04300D		BnaA01g08620D	BnaA01g05450D
BnaA01g05920D	BnaA01g04450D		BnaA01g08760D	BnaA01g05570D
BnaA01g06010D	BnaA01g04460D		BnaA01g08770D	BnaA01g05670D
BnaA01g06110D	BnaA01g04470D		BnaA01g08830D	BnaA01g05700D
BnaA01g06120D	BnaA01g04480D		BnaA01g08920D	BnaA01g05720D
BnaA01g06170D	BnaA01g04600D		BnaA01g09060D	BnaA01g05730D
BnaA01g06210D	BnaA01g04640D		BnaA01g09070D	BnaA01g05770D
BnaA01g06270D	BnaA01g04650D		BnaA01g09200D	BnaA01g05890D
BnaA01g06350D	BnaA01g04660D		BnaA01g09220D	BnaA01g05900D
BnaA01g06390D	BnaA01g04670D		BnaA01g09240D	BnaA01g06060D
BnaA01g06400D	BnaA01g04710D		BnaA01g09620D	BnaA01g06100D
BnaA01g06410D	BnaA01g04720D		BnaA01g09690D	BnaA01g06130D
BnaA01g06500D	BnaA01g04730D		BnaA01g09700D	BnaA01g06190D
BnaA01g06520D	BnaA01g04740D		BnaA01g09710D	BnaA01g06240D
BnaA01g06530D	BnaA01g04750D		BnaA01g09740D	BnaA01g06310D
BnaA01g06540D	BnaA01g04780D		BnaA01g09780D	BnaA01g06490D
BnaA01g06680D	BnaA01g04790D		BnaA01g09790D	BnaA01g06550D
BnaA01g06710D	BnaA01g04800D		BnaA01g09920D	BnaA01g06570D
BnaA01g06760D	BnaA01g04910D		BnaA01g10030D	BnaA01g06640D
BnaA01g06780D	BnaA01g04970D		BnaA01g10140D	BnaA01g06660D
BnaA01g06800D	BnaA01g05010D		BnaA01g10210D	BnaA01g06730D
BnaA01g06820D	BnaA01g05140D		BnaA01g10300D	BnaA01g06870D
BnaA01g06840D	BnaA01g05170D		BnaA01g10310D	BnaA01g06890D
BnaA01g06850D	BnaA01g05240D		BnaA01g10320D	BnaA01g07080D
BnaA01g06860D	BnaA01g05270D		BnaA01g10360D	BnaA01g07090D
BnaA01g06990D	BnaA01g05320D		BnaA01g10420D	BnaA01g07110D
BnaA01g07000D	BnaA01g05380D		BnaA01g10450D	BnaA01g07120D
BnaA01g07130D	BnaA01g05450D		BnaA01g10650D	BnaA01g07220D
BnaA01g07170D	BnaA01g05480D		BnaA01g10660D	BnaA01g07320D
BnaA01g07180D	BnaA01g05490D		BnaA01g10690D	BnaA01g07550D
BnaA01g07200D	BnaA01g05570D		BnaA01g10750D	BnaA01g07570D
BnaA01g07210D	BnaA01g05670D		BnaA01g11010D	BnaA01g07620D
BnaA01g07240D	BnaA01g05720D		BnaA01g11030D	BnaA01g07670D
BnaA01g07270D	BnaA01g05730D		BnaA01g11060D	BnaA01g07720D
BnaA01g07320D	BnaA01g05760D		BnaA01g11220D	BnaA01g07820D
BnaA01g07340D	BnaA01g05770D		BnaA01g11250D	BnaA01g08050D
BnaA01g07360D	BnaA01g05800D		BnaA01g11280D	BnaA01g08060D
BnaA01g07420D	BnaA01g05840D		BnaA01g11330D	BnaA01g08120D
BnaA01g07430D	BnaA01g05860D		BnaA01g11390D	BnaA01g08140D
BnaA01g07440D	BnaA01g05890D		BnaA01g11400D	BnaA01g08150D
BnaA01g07450D	BnaA01g05900D		BnaA01g11410D	BnaA01g08160D
BnaA01g07470D	BnaA01g05990D		BnaA01g11500D	BnaA01g08170D
BnaA01g07530D	BnaA01g06030D		BnaA01g11510D	BnaA01g08240D
BnaA01g07540D	BnaA01g06040D		BnaA01g11730D	BnaA01g08250D
BnaA01g07600D	BnaA01g06100D		BnaA01g11760D	BnaA01g08260D
BnaA01g07840D	BnaA01g06130D		BnaA01g11830D	BnaA01g08290D
BnaA01g07860D	BnaA01g06160D		BnaA01g11840D	BnaA01g08320D
BnaA01g07920D	BnaA01g06190D		BnaA01g11880D	BnaA01g08340D
BnaA01g07930D	BnaA01g06220D		BnaA01g11910D	BnaA01g08460D
BnaA01g07940D	BnaA01g06240D		BnaA01g11990D	BnaA01g08490D
BnaA01g07970D	BnaA01g06310D		BnaA01g12190D	BnaA01g08520D
BnaA01g08000D	BnaA01g06330D		BnaA01g12270D	BnaA01g08630D
BnaA01g08010D	BnaA01g06490D		BnaA01g12340D	BnaA01g08640D
BnaA01g08090D	BnaA01g06550D		BnaA01g12380D	BnaA01g08680D
BnaA01g08210D	BnaA01g06640D		BnaA01g12560D	BnaA01g08750D
BnaA01g08310D	BnaA01g06700D		BnaA01g12590D	BnaA01g08780D
BnaA01g08330D	BnaA01g06730D		BnaA01g12840D	BnaA01g08800D
BnaA01g08360D	BnaA01g06750D		BnaA01g12900D	BnaA01g08900D
BnaA01g08420D	BnaA01g06770D		BnaA01g12930D	BnaA01g08930D
BnaA01g08470D	BnaA01g06810D		BnaA01g12940D	BnaA01g08990D
BnaA01g08500D	BnaA01g06890D		BnaA01g12950D	BnaA01g09020D
BnaA01g08530D	BnaA01g06910D		BnaA01g12960D	BnaA01g09110D
BnaA01g08540D	BnaA01g06970D		BnaA01g12970D	BnaA01g09120D
BnaA01g08620D	BnaA01g07090D		BnaA01g12980D	BnaA01g09130D
BnaA01g08760D	BnaA01g07110D		BnaA01g12990D	BnaA01g09150D
BnaA01g08770D	BnaA01g07120D		BnaA01g13080D	BnaA01g09180D
BnaA01g08920D	BnaA01g07160D		BnaA01g13170D	BnaA01g09250D
BnaA01g08960D	BnaA01g07220D		BnaA01g13210D	BnaA01g09260D
BnaA01g09060D	BnaA01g07460D		BnaA01g13220D	BnaA01g09270D
BnaA01g09070D	BnaA01g07550D		BnaA01g13250D	BnaA01g09370D
BnaA01g09130D	BnaA01g07620D		BnaA01g13280D	BnaA01g09420D
BnaA01g09180D	BnaA01g07750D		BnaA01g13290D	BnaA01g09550D
BnaA01g09200D	BnaA01g07810D		BnaA01g13390D	BnaA01g09570D
BnaA01g09220D	BnaA01g07960D		BnaA01g13430D	BnaA01g09640D
BnaA01g09530D	BnaA01g08060D		BnaA01g13440D	BnaA01g09650D
BnaA01g09540D	BnaA01g08140D		BnaA01g13470D	BnaA01g09770D
BnaA01g09620D	BnaA01g08150D		BnaA01g13540D	BnaA01g09890D
BnaA01g09680D	BnaA01g08160D		BnaA01g13630D	BnaA01g09900D
BnaA01g09690D	BnaA01g08240D		BnaA01g13650D	BnaA01g09980D
BnaA01g09700D	BnaA01g08260D		BnaA01g13670D	BnaA01g09990D
BnaA01g09710D	BnaA01g08280D		BnaA01g13750D	BnaA01g10000D
BnaA01g09740D	BnaA01g08290D		BnaA01g13800D	BnaA01g10020D
BnaA01g09790D	BnaA01g08450D		BnaA01g13810D	BnaA01g10040D
BnaA01g09800D	BnaA01g08520D		BnaA01g13820D	BnaA01g10060D
BnaA01g09810D	BnaA01g08550D		BnaA01g13830D	BnaA01g10070D
BnaA01g09920D	BnaA01g08610D		BnaA01g13850D	BnaA01g10170D
BnaA01g09930D	BnaA01g08630D		BnaA01g13870D	BnaA01g10340D
BnaA01g09940D	BnaA01g08640D		BnaA01g13880D	BnaA01g10370D
BnaA01g09970D	BnaA01g08710D		BnaA01g13910D	BnaA01g10440D
BnaA01g10030D	BnaA01g08750D		BnaA01g13950D	BnaA01g10480D
BnaA01g10050D	BnaA01g08780D		BnaA01g14070D	BnaA01g10520D
BnaA01g10100D	BnaA01g08810D		BnaA01g14190D	BnaA01g10530D
BnaA01g10130D	BnaA01g08850D		BnaA01g14370D	BnaA01g10550D
BnaA01g10140D	BnaA01g08890D		BnaA01g14380D	BnaA01g10610D
BnaA01g10150D	BnaA01g08900D		BnaA01g14410D	BnaA01g10620D
BnaA01g10210D	BnaA01g08910D		BnaA01g14440D	BnaA01g10740D
BnaA01g10220D	BnaA01g08930D		BnaA01g14460D	BnaA01g10780D
BnaA01g10300D	BnaA01g08940D		BnaA01g14520D	BnaA01g10790D
BnaA01g10320D	BnaA01g08990D		BnaA01g14530D	BnaA01g10840D
BnaA01g10350D	BnaA01g09010D		BnaA01g14720D	BnaA01g10940D
BnaA01g10360D	BnaA01g09020D		BnaA01g14730D	BnaA01g11100D
BnaA01g10420D	BnaA01g09030D		BnaA01g14790D	BnaA01g11110D
BnaA01g10450D	BnaA01g09110D		BnaA01g14840D	BnaA01g11140D
BnaA01g10580D	BnaA01g09150D		BnaA01g14860D	BnaA01g11190D
BnaA01g10630D	BnaA01g09240D		BnaA01g14950D	BnaA01g11290D
BnaA01g10650D	BnaA01g09250D		BnaA01g14960D	BnaA01g11350D
BnaA01g10660D	BnaA01g09260D		BnaA01g15000D	BnaA01g11370D
BnaA01g10670D	BnaA01g09270D		BnaA01g15080D	BnaA01g11380D
BnaA01g10690D	BnaA01g09360D		BnaA01g15110D	BnaA01g11460D
BnaA01g10750D	BnaA01g09370D		BnaA01g15240D	BnaA01g11540D
BnaA01g10800D	BnaA01g09400D		BnaA01g15250D	BnaA01g11600D
BnaA01g10820D	BnaA01g09420D		BnaA01g15270D	BnaA01g11650D
BnaA01g11000D	BnaA01g09430D		BnaA01g15380D	BnaA01g11660D
BnaA01g11010D	BnaA01g09470D		BnaA01g15410D	BnaA01g11670D
BnaA01g11060D	BnaA01g09480D		BnaA01g15420D	BnaA01g11690D
BnaA01g11220D	BnaA01g09520D		BnaA01g15450D	BnaA01g11800D
BnaA01g11250D	BnaA01g09550D		BnaA01g15510D	BnaA01g11960D
BnaA01g11280D	BnaA01g09570D		BnaA01g15560D	BnaA01g12010D
BnaA01g11330D	BnaA01g09640D		BnaA01g15670D	BnaA01g12020D
BnaA01g11390D	BnaA01g09650D		BnaA01g15720D	BnaA01g12060D
BnaA01g11400D	BnaA01g09770D		BnaA01g15920D	BnaA01g12090D
BnaA01g11410D	BnaA01g09820D		BnaA01g15980D	BnaA01g12100D
BnaA01g11500D	BnaA01g09890D		BnaA01g16050D	BnaA01g12110D
BnaA01g11510D	BnaA01g09900D		BnaA01g16070D	BnaA01g12150D
BnaA01g11530D	BnaA01g09980D		BnaA01g16370D	BnaA01g12170D
BnaA01g11640D	BnaA01g10000D		BnaA01g16400D	BnaA01g12280D
BnaA01g11840D	BnaA01g10020D		BnaA01g16410D	BnaA01g12360D
BnaA01g11880D	BnaA01g10040D		BnaA01g16490D	BnaA01g12400D
BnaA01g11910D	BnaA01g10070D		BnaA01g16510D	BnaA01g12460D
BnaA01g11990D	BnaA01g10170D		BnaA01g16560D	BnaA01g12480D
BnaA01g12120D	BnaA01g10200D		BnaA01g16670D	BnaA01g12510D
BnaA01g12130D	BnaA01g10260D		BnaA01g16700D	BnaA01g12680D
BnaA01g12140D	BnaA01g10340D		BnaA01g16740D	BnaA01g12730D
BnaA01g12270D	BnaA01g10370D		BnaA01g16940D	BnaA01g12790D
BnaA01g12340D	BnaA01g10400D		BnaA01g17050D	BnaA01g12860D
BnaA01g12380D	BnaA01g10460D		BnaA01g17140D	BnaA01g13000D
BnaA01g12390D	BnaA01g10480D		BnaA01g17210D	BnaA01g13010D
BnaA01g12490D	BnaA01g10520D		BnaA01g17330D	BnaA01g13020D
BnaA01g12560D	BnaA01g10530D		BnaA01g17540D	BnaA01g13090D
BnaA01g12590D	BnaA01g10540D		BnaA01g17600D	BnaA01g13130D
BnaA01g12650D	BnaA01g10550D		BnaA01g17660D	BnaA01g13190D
BnaA01g12840D	BnaA01g10740D		BnaA01g17690D	BnaA01g13420D
BnaA01g12870D	BnaA01g10780D		BnaA01g17740D	BnaA01g13460D
BnaA01g12900D	BnaA01g10790D		BnaA01g17770D	BnaA01g13480D
BnaA01g12910D	BnaA01g10810D		BnaA01g17800D	BnaA01g13510D
BnaA01g12940D	BnaA01g11080D		BnaA01g17950D	BnaA01g13550D
BnaA01g12950D	BnaA01g11100D		BnaA01g18100D	BnaA01g13620D
BnaA01g12960D	BnaA01g11130D		BnaA01g18160D	BnaA01g13660D
BnaA01g12970D	BnaA01g11140D		BnaA01g18330D	BnaA01g13690D
BnaA01g12980D	BnaA01g11190D		BnaA01g18390D	BnaA01g13710D
BnaA01g12990D	BnaA01g11210D		BnaA01g18660D	BnaA01g13740D
BnaA01g13140D	BnaA01g11290D		BnaA01g18670D	BnaA01g13900D
BnaA01g13170D	BnaA01g11340D		BnaA01g18690D	BnaA01g13920D
BnaA01g13220D	BnaA01g11360D		BnaA01g18760D	BnaA01g13970D
BnaA01g13280D	BnaA01g11370D		BnaA01g18950D	BnaA01g14030D
BnaA01g13290D	BnaA01g11380D		BnaA01g18990D	BnaA01g14060D
BnaA01g13370D	BnaA01g11540D		BnaA01g19040D	BnaA01g14110D
BnaA01g13390D	BnaA01g11600D		BnaA01g19100D	BnaA01g14120D
BnaA01g13430D	BnaA01g11660D		BnaA01g19120D	BnaA01g14130D
BnaA01g13440D	BnaA01g11670D		BnaA01g19150D	BnaA01g14290D
BnaA01g13470D	BnaA01g11800D		BnaA01g19190D	BnaA01g14320D
BnaA01g13540D	BnaA01g12010D		BnaA01g19200D	BnaA01g14330D
BnaA01g13570D	BnaA01g12020D		BnaA01g19270D	BnaA01g14340D
BnaA01g13630D	BnaA01g12060D		BnaA01g19300D	BnaA01g14400D
BnaA01g13650D	BnaA01g12090D		BnaA01g19450D	BnaA01g14640D
BnaA01g13670D	BnaA01g12100D		BnaA01g19530D	BnaA01g14770D
BnaA01g13800D	BnaA01g12150D		BnaA01g19590D	BnaA01g14850D
BnaA01g13810D	BnaA01g12170D		BnaA01g19710D	BnaA01g14880D
BnaA01g13820D	BnaA01g12280D		BnaA01g19850D	BnaA01g14890D
BnaA01g13830D	BnaA01g12310D		BnaA01g19880D	BnaA01g15010D
BnaA01g13850D	BnaA01g12360D		BnaA01g19960D	BnaA01g15020D
BnaA01g13870D	BnaA01g12400D		BnaA01g19990D	BnaA01g15040D
BnaA01g13880D	BnaA01g12450D		BnaA01g20050D	BnaA01g15050D
BnaA01g13940D	BnaA01g12460D		BnaA01g20090D	BnaA01g15100D
BnaA01g13950D	BnaA01g12470D		BnaA01g20280D	BnaA01g15120D
BnaA01g13960D	BnaA01g12510D		BnaA01g20290D	BnaA01g15130D
BnaA01g14070D	BnaA01g12530D		BnaA01g20390D	BnaA01g15150D
BnaA01g14150D	BnaA01g12680D		BnaA01g20410D	BnaA01g15180D
BnaA01g14190D	BnaA01g12730D		BnaA01g20480D	BnaA01g15220D
BnaA01g14200D	BnaA01g12740D		BnaA01g20500D	BnaA01g15320D
BnaA01g14260D	BnaA01g12790D		BnaA01g20600D	BnaA01g15490D
BnaA01g14270D	BnaA01g12800D		BnaA01g20630D	BnaA01g15500D
BnaA01g14310D	BnaA01g12860D		BnaA01g20660D	BnaA01g15590D
BnaA01g14370D	BnaA01g13040D		BnaA01g20680D	BnaA01g15640D
BnaA01g14380D	BnaA01g13090D		BnaA01g20690D	BnaA01g15700D
BnaA01g14410D	BnaA01g13100D		BnaA01g20710D	BnaA01g15740D
BnaA01g14460D	BnaA01g13190D		BnaA01g20770D	BnaA01g15780D
BnaA01g14490D	BnaA01g13400D		BnaA01g20790D	BnaA01g15880D
BnaA01g14520D	BnaA01g13480D		BnaA01g20800D	BnaA01g15910D
BnaA01g14660D	BnaA01g13500D		BnaA01g20810D	BnaA01g15960D
BnaA01g14680D	BnaA01g13510D		BnaA01g20890D	BnaA01g16010D
BnaA01g14710D	BnaA01g13560D		BnaA01g20900D	BnaA01g16040D
BnaA01g14720D	BnaA01g13690D		BnaA01g20950D	BnaA01g16140D
BnaA01g14730D	BnaA01g13700D		BnaA01g21450D	BnaA01g16240D
BnaA01g14860D	BnaA01g13710D		BnaA01g21510D	BnaA01g16260D
BnaA01g14950D	BnaA01g13720D		BnaA01g21860D	BnaA01g16270D
BnaA01g14960D	BnaA01g13740D		BnaA01g21980D	BnaA01g16280D
BnaA01g15000D	BnaA01g13760D		BnaA01g22000D	BnaA01g16300D
BnaA01g15080D	BnaA01g13770D		BnaA01g22040D	BnaA01g16360D
BnaA01g15090D	BnaA01g13890D		BnaA01g22050D	BnaA01g16420D
BnaA01g15110D	BnaA01g13920D		BnaA01g22120D	BnaA01g16430D
BnaA01g15140D	BnaA01g13970D		BnaA01g22130D	BnaA01g16440D
BnaA01g15150D	BnaA01g13980D		BnaA01g22150D	BnaA01g16460D
BnaA01g15240D	BnaA01g13990D		BnaA01g22310D	BnaA01g16480D
BnaA01g15280D	BnaA01g14010D		BnaA01g22500D	BnaA01g16570D
BnaA01g15300D	BnaA01g14030D		BnaA01g22600D	BnaA01g16620D
BnaA01g15310D	BnaA01g14060D		BnaA01g22610D	BnaA01g16680D
BnaA01g15370D	BnaA01g14110D		BnaA01g22680D	BnaA01g16830D
BnaA01g15410D	BnaA01g14120D		BnaA01g22750D	BnaA01g16840D
BnaA01g15420D	BnaA01g14290D		BnaA01g22760D	BnaA01g16850D
BnaA01g15600D	BnaA01g14320D		BnaA01g22800D	BnaA01g16960D
BnaA01g15690D	BnaA01g14330D		BnaA01g22890D	BnaA01g16970D
BnaA01g15720D	BnaA01g14340D		BnaA01g22910D	BnaA01g16990D
BnaA01g15770D	BnaA01g14400D		BnaA01g22920D	BnaA01g17000D
BnaA01g15790D	BnaA01g14430D		BnaA01g22950D	BnaA01g17010D
BnaA01g15810D	BnaA01g14450D		BnaA01g23050D	BnaA01g17070D
BnaA01g15870D	BnaA01g14560D		BnaA01g23150D	BnaA01g17100D
BnaA01g15930D	BnaA01g14590D		BnaA01g23310D	BnaA01g17150D
BnaA01g15980D	BnaA01g14640D		BnaA01g23490D	BnaA01g17170D
BnaA01g16050D	BnaA01g14700D		BnaA01g23510D	BnaA01g17360D
BnaA01g16060D	BnaA01g14850D		BnaA01g23620D	BnaA01g17430D
BnaA01g16070D	BnaA01g14870D		BnaA01g23650D	BnaA01g17440D
BnaA01g16130D	BnaA01g14880D		BnaA01g23660D	BnaA01g17450D
BnaA01g16160D	BnaA01g14940D		BnaA01g23770D	BnaA01g17480D
BnaA01g16170D	BnaA01g14990D		BnaA01g23850D	BnaA01g17550D
BnaA01g16310D	BnaA01g15010D		BnaA01g23930D	BnaA01g17630D
BnaA01g16320D	BnaA01g15040D		BnaA01g23940D	BnaA01g17700D
BnaA01g16370D	BnaA01g15060D		BnaA01g24030D	BnaA01g17760D
BnaA01g16390D	BnaA01g15100D		BnaA01g24320D	BnaA01g17810D
BnaA01g16400D	BnaA01g15130D		BnaA01g24330D	BnaA01g17910D
BnaA01g16470D	BnaA01g15180D		BnaA01g24360D	BnaA01g17940D
BnaA01g16490D	BnaA01g15220D		BnaA01g24430D	BnaA01g17980D
BnaA01g16540D	BnaA01g15320D		BnaA01g24530D	BnaA01g17990D
BnaA01g16560D	BnaA01g15350D		BnaA01g24550D	BnaA01g18050D
BnaA01g16670D	BnaA01g15360D		BnaA01g24770D	BnaA01g18060D
BnaA01g16680D	BnaA01g15440D		BnaA01g24790D	BnaA01g18170D
BnaA01g16700D	BnaA01g15480D		BnaA01g24880D	BnaA01g18180D
BnaA01g16720D	BnaA01g15490D		BnaA01g24920D	BnaA01g18250D
BnaA01g16730D	BnaA01g15590D		BnaA01g24930D	BnaA01g18320D
BnaA01g16780D	BnaA01g15640D		BnaA01g24940D	BnaA01g18350D
BnaA01g16810D	BnaA01g15700D		BnaA01g25140D	BnaA01g18380D
BnaA01g16940D	BnaA01g15740D		BnaA01g25350D	BnaA01g18410D
BnaA01g16950D	BnaA01g15760D		BnaA01g25450D	BnaA01g18460D
BnaA01g17030D	BnaA01g15780D		BnaA01g25490D	BnaA01g18580D
BnaA01g17050D	BnaA01g15800D		BnaA01g25510D	BnaA01g18590D
BnaA01g17140D	BnaA01g15820D		BnaA01g25520D	BnaA01g18640D
BnaA01g17250D	BnaA01g15900D		BnaA01g25670D	BnaA01g18650D
BnaA01g17290D	BnaA01g15950D		BnaA01g25870D	BnaA01g18750D
BnaA01g17340D	BnaA01g16010D		BnaA01g25990D	BnaA01g18770D
BnaA01g17410D	BnaA01g16020D		BnaA01g26130D	BnaA01g18870D
BnaA01g17460D	BnaA01g16140D		BnaA01g26250D	BnaA01g18890D
BnaA01g17510D	BnaA01g16240D		BnaA01g26290D	BnaA01g18940D
BnaA01g17540D	BnaA01g16250D		BnaA01g26330D	BnaA01g18960D
BnaA01g17560D	BnaA01g16260D		BnaA01g26340D	BnaA01g19020D
BnaA01g17600D	BnaA01g16270D		BnaA01g26430D	BnaA01g19090D
BnaA01g17650D	BnaA01g16300D		BnaA01g26560D	BnaA01g19170D
BnaA01g17690D	BnaA01g16360D		BnaA01g26650D	BnaA01g19260D
BnaA01g17740D	BnaA01g16420D		BnaA01g26670D	BnaA01g19280D
BnaA01g17820D	BnaA01g16430D		BnaA01g26690D	BnaA01g19400D
BnaA01g17830D	BnaA01g16440D		BnaA01g26860D	BnaA01g19550D
BnaA01g17860D	BnaA01g16450D		BnaA01g26960D	BnaA01g19650D
BnaA01g17870D	BnaA01g16460D		BnaA01g26970D	BnaA01g19750D
BnaA01g17900D	BnaA01g16530D		BnaA01g26980D	BnaA01g19790D
BnaA01g17950D	BnaA01g16620D		BnaA01g27010D	BnaA01g20040D
BnaA01g17960D	BnaA01g16630D		BnaA01g27170D	BnaA01g20160D
BnaA01g17970D	BnaA01g16650D		BnaA01g27190D	BnaA01g20190D
BnaA01g18060D	BnaA01g16740D		BnaA01g27360D	BnaA01g20230D
BnaA01g18070D	BnaA01g16830D		BnaA01g27450D	BnaA01g20270D
BnaA01g18100D	BnaA01g16840D		BnaA01g27540D	BnaA01g20300D
BnaA01g18160D	BnaA01g16850D		BnaA01g27550D	BnaA01g20350D
BnaA01g18210D	BnaA01g16870D		BnaA01g27580D	BnaA01g20370D
BnaA01g18330D	BnaA01g16990D		BnaA01g27690D	BnaA01g20470D
BnaA01g18390D	BnaA01g17000D		BnaA01g27740D	BnaA01g20490D
BnaA01g18540D	BnaA01g17010D		BnaA01g27800D	BnaA01g20550D
BnaA01g18650D	BnaA01g17020D		BnaA01g27810D	BnaA01g20560D
BnaA01g18660D	BnaA01g17040D		BnaA01g27860D	BnaA01g20620D
BnaA01g18670D	BnaA01g17070D		BnaA01g27890D	BnaA01g20760D
BnaA01g18690D	BnaA01g17100D		BnaA01g27930D	BnaA01g20830D
BnaA01g18730D	BnaA01g17120D		BnaA01g27940D	BnaA01g20850D
BnaA01g18760D	BnaA01g17130D		BnaA01g28090D	BnaA01g20860D
BnaA01g18780D	BnaA01g17150D		BnaA01g28130D	BnaA01g20960D
BnaA01g18880D	BnaA01g17170D		BnaA01g28180D	BnaA01g21030D
BnaA01g18900D	BnaA01g17280D		BnaA01g28190D	BnaA01g21120D
BnaA01g18940D	BnaA01g17360D		BnaA01g28210D	BnaA01g21140D
BnaA01g18950D	BnaA01g17440D		BnaA01g28310D	BnaA01g21150D
BnaA01g18990D	BnaA01g17490D		BnaA01g28330D	BnaA01g21270D
BnaA01g19100D	BnaA01g17570D		BnaA01g28460D	BnaA01g21380D
BnaA01g19120D	BnaA01g17630D		BnaA01g28490D	BnaA01g21560D
BnaA01g19150D	BnaA01g17720D		BnaA01g28810D	BnaA01g21620D
BnaA01g19190D	BnaA01g17750D		BnaA01g28840D	BnaA01g21650D
BnaA01g19270D	BnaA01g17760D		BnaA01g28850D	BnaA01g21820D
BnaA01g19300D	BnaA01g17780D		BnaA01g28910D	BnaA01g21990D
BnaA01g19310D	BnaA01g17810D		BnaA01g28930D	BnaA01g22110D
BnaA01g19450D	BnaA01g17910D		BnaA01g28970D	BnaA01g22170D
BnaA01g19480D	BnaA01g17940D		BnaA01g29060D	BnaA01g22190D
BnaA01g19530D	BnaA01g17980D		BnaA01g29130D	BnaA01g22220D
BnaA01g19540D	BnaA01g17990D		BnaA01g29140D	BnaA01g22240D
BnaA01g19590D	BnaA01g18010D		BnaA01g29220D	BnaA01g22360D
BnaA01g19710D	BnaA01g18050D		BnaA01g29290D	BnaA01g22440D
BnaA01g19850D	BnaA01g18130D		BnaA01g29390D	BnaA01g22490D
BnaA01g19870D	BnaA01g18170D		BnaA01g29610D	BnaA01g22540D
BnaA01g19880D	BnaA01g18270D		BnaA01g29800D	BnaA01g22650D
BnaA01g19890D	BnaA01g18320D		BnaA01g29870D	BnaA01g22670D
BnaA01g19960D	BnaA01g18380D		BnaA01g29880D	BnaA01g22710D
BnaA01g20190D	BnaA01g18410D		BnaA01g29890D	BnaA01g22930D
BnaA01g20260D	BnaA01g18460D		BnaA01g29990D	BnaA01g22940D
BnaA01g20290D	BnaA01g18530D		BnaA01g30000D	BnaA01g22970D
BnaA01g20480D	BnaA01g18550D		BnaA01g30120D	BnaA01g23040D
BnaA01g20600D	BnaA01g18580D		BnaA01g30130D	BnaA01g23070D
BnaA01g20630D	BnaA01g18750D		BnaA01g30210D	BnaA01g23130D
BnaA01g20660D	BnaA01g18870D		BnaA01g30220D	BnaA01g23140D
BnaA01g20670D	BnaA01g18890D		BnaA01g30470D	BnaA01g23160D
BnaA01g20690D	BnaA01g18920D		BnaA01g30490D	BnaA01g23230D
BnaA01g20710D	BnaA01g19020D		BnaA01g30500D	BnaA01g23340D
BnaA01g20730D	BnaA01g19040D		BnaA01g30740D	BnaA01g23460D
BnaA01g20770D	BnaA01g19090D		BnaA01g30770D	BnaA01g23470D
BnaA01g20790D	BnaA01g19130D		BnaA01g30780D	BnaA01g23600D
BnaA01g20800D	BnaA01g19170D		BnaA01g30800D	BnaA01g23690D
BnaA01g20950D	BnaA01g19180D		BnaA01g30810D	BnaA01g23830D
BnaA01g21200D	BnaA01g19230D		BnaA01g31000D	BnaA01g23840D
BnaA01g21220D	BnaA01g19260D		BnaA01g31120D	BnaA01g23900D
BnaA01g21450D	BnaA01g19280D		BnaA01g31160D	BnaA01g24110D
BnaA01g21510D	BnaA01g19400D		BnaA01g31500D	BnaA01g24140D
BnaA01g21860D	BnaA01g19490D		BnaA01g31570D	BnaA01g24160D
BnaA01g21890D	BnaA01g19500D		BnaA01g31610D	BnaA01g24250D
BnaA01g21930D	BnaA01g19650D		BnaA01g31650D	BnaA01g24280D
BnaA01g21980D	BnaA01g19700D		BnaA01g31730D	BnaA01g24470D
BnaA01g22000D	BnaA01g19740D		BnaA01g31820D	BnaA01g24490D
BnaA01g22010D	BnaA01g19750D		BnaA01g31830D	BnaA01g24510D
BnaA01g22030D	BnaA01g19790D		BnaA01g31850D	BnaA01g24630D
BnaA01g22040D	BnaA01g19810D		BnaA01g31880D	BnaA01g24690D
BnaA01g22050D	BnaA01g20040D		BnaA01g32030D	BnaA01g24750D
BnaA01g22090D	BnaA01g20050D		BnaA01g32040D	BnaA01g24830D
BnaA01g22150D	BnaA01g20080D		BnaA01g32110D	BnaA01g24950D
BnaA01g22340D	BnaA01g20230D		BnaA01g32210D	BnaA01g25000D
BnaA01g22500D	BnaA01g20300D		BnaA01g32220D	BnaA01g25190D
BnaA01g22590D	BnaA01g20340D		BnaA01g32230D	BnaA01g25230D
BnaA01g22610D	BnaA01g20350D		BnaA01g32280D	BnaA01g25250D
BnaA01g22680D	BnaA01g20370D		BnaA01g32310D	BnaA01g25290D
BnaA01g22690D	BnaA01g20410D		BnaA01g32320D	BnaA01g25300D
BnaA01g22700D	BnaA01g20420D		BnaA01g32340D	BnaA01g25330D
BnaA01g22750D	BnaA01g20440D		BnaA01g32400D	BnaA01g25360D
BnaA01g22760D	BnaA01g20460D		BnaA01g32460D	BnaA01g25370D
BnaA01g22770D	BnaA01g20470D		BnaA01g32470D	BnaA01g25390D
BnaA01g22800D	BnaA01g20550D		BnaA01g32490D	BnaA01g25400D
BnaA01g22890D	BnaA01g20560D		BnaA01g32590D	BnaA01g25500D
BnaA01g22900D	BnaA01g20620D		BnaA01g32660D	BnaA01g25590D
BnaA01g22910D	BnaA01g20640D		BnaA01g32760D	BnaA01g25600D
BnaA01g22920D	BnaA01g20760D		BnaA01g32890D	BnaA01g25780D
BnaA01g22990D	BnaA01g20840D		BnaA01g32900D	BnaA01g25860D
BnaA01g23120D	BnaA01g20850D		BnaA01g33050D	BnaA01g25890D
BnaA01g23130D	BnaA01g20860D		BnaA01g33060D	BnaA01g25920D
BnaA01g23180D	BnaA01g20960D		BnaA01g33130D	BnaA01g25950D
BnaA01g23200D	BnaA01g21030D		BnaA01g33220D	BnaA01g26040D
BnaA01g23270D	BnaA01g21120D		BnaA01g33230D	BnaA01g26070D
BnaA01g23290D	BnaA01g21180D		BnaA01g33350D	BnaA01g26110D
BnaA01g23310D	BnaA01g21250D		BnaA01g33360D	BnaA01g26180D
BnaA01g23510D	BnaA01g21380D		BnaA01g33370D	BnaA01g26230D
BnaA01g23530D	BnaA01g21410D		BnaA01g33400D	BnaA01g26300D
BnaA01g23550D	BnaA01g21440D		BnaA01g33610D	BnaA01g26310D
BnaA01g23620D	BnaA01g21580D		BnaA01g33660D	BnaA01g26500D
BnaA01g23650D	BnaA01g21620D		BnaA01g33670D	BnaA01g26520D
BnaA01g23660D	BnaA01g21650D		BnaA01g33700D	BnaA01g26660D
BnaA01g23700D	BnaA01g21690D		BnaA01g33750D	BnaA01g26720D
BnaA01g23770D	BnaA01g21720D		BnaA01g33870D	BnaA01g26770D
BnaA01g23850D	BnaA01g21750D		BnaA01g33880D	BnaA01g26810D
BnaA01g23930D	BnaA01g21820D		BnaA01g33990D	BnaA01g26890D
BnaA01g23940D	BnaA01g21880D		BnaA01g34090D	BnaA01g27000D
BnaA01g23960D	BnaA01g21960D		BnaA01g34310D	BnaA01g27080D
BnaA01g23980D	BnaA01g21990D		BnaA01g34380D	BnaA01g27140D
BnaA01g24030D	BnaA01g22060D		BnaA01g34470D	BnaA01g27270D
BnaA01g24070D	BnaA01g22110D		BnaA01g34500D	BnaA01g27510D
BnaA01g24140D	BnaA01g22130D		BnaA01g34520D	BnaA01g27600D
BnaA01g24190D	BnaA01g22170D		BnaA01g34540D	BnaA01g27660D
BnaA01g24300D	BnaA01g22190D		BnaA01g34570D	BnaA01g27680D
BnaA01g24430D	BnaA01g22220D		BnaA01g34590D	BnaA01g27710D
BnaA01g24530D	BnaA01g22240D		BnaA01g34600D	BnaA01g28110D
BnaA01g24550D	BnaA01g22300D		BnaA01g34610D	BnaA01g28120D
BnaA01g24770D	BnaA01g22360D		BnaA01g34620D	BnaA01g28150D
BnaA01g24790D	BnaA01g22400D		BnaA01g34650D	BnaA01g28160D
BnaA01g24800D	BnaA01g22440D		BnaA01g34720D	BnaA01g28340D
BnaA01g24880D	BnaA01g22480D		BnaA01g34740D	BnaA01g28580D
BnaA01g24920D	BnaA01g22490D		BnaA01g34910D	BnaA01g28640D
BnaA01g24930D	BnaA01g22540D		BnaA01g34980D	BnaA01g28670D
BnaA01g24940D	BnaA01g22550D		BnaA01g35070D	BnaA01g28820D
BnaA01g24980D	BnaA01g22670D		BnaA01g35080D	BnaA01g28830D
BnaA01g25240D	BnaA01g22930D		BnaA01g35160D	BnaA01g28880D
BnaA01g25250D	BnaA01g22940D		BnaA01g35260D	BnaA01g28890D
BnaA01g25260D	BnaA01g22960D		BnaA01g35410D	BnaA01g28900D
BnaA01g25410D	BnaA01g22970D		BnaA01g35740D	BnaA01g28980D
BnaA01g25450D	BnaA01g23030D		BnaA01g35760D	BnaA01g29000D
BnaA01g25490D	BnaA01g23040D		BnaA01g35820D	BnaA01g29080D
BnaA01g25510D	BnaA01g23070D		BnaA01g35860D	BnaA01g29180D
BnaA01g25670D	BnaA01g23090D		BnaA01g35870D	BnaA01g29230D
BnaA01g25770D	BnaA01g23140D		BnaA01g35910D	BnaA01g29260D
BnaA01g25900D	BnaA01g23160D		BnaA01g36090D	BnaA01g29300D
BnaA01g25940D	BnaA01g23220D		BnaA01g36100D	BnaA01g29410D
BnaA01g25960D	BnaA01g23320D		BnaA01g36140D	BnaA01g29440D
BnaA01g25990D	BnaA01g23340D		BnaA01g36230D	BnaA01g29510D
BnaA01g26000D	BnaA01g23420D		BnaA01g36270D	BnaA01g29520D
BnaA01g26020D	BnaA01g23540D		BnaA01g36280D	BnaA01g29540D
BnaA01g26100D	BnaA01g23560D		BnaA01g36380D	BnaA01g29700D
BnaA01g26130D	BnaA01g23600D		BnaA01g36430D	BnaA01g29850D
BnaA01g26240D	BnaA01g23640D		BnaA01g36440D	BnaA01g29950D
BnaA01g26250D	BnaA01g23790D		BnaA01g36480D	BnaA01g29960D
BnaA01g26290D	BnaA01g23830D		BnaA01g36630D	BnaA01g30020D
BnaA01g26340D	BnaA01g23870D		BnaA01g36770D	BnaA01g30070D
BnaA01g26430D	BnaA01g23880D		BnaA01g36880D	BnaA01g30080D
BnaA01g26480D	BnaA01g23900D		BnaA01g36930D	BnaA01g30190D
BnaA01g26810D	BnaA01g23920D		BnaA01g37020D	BnaA01g30200D
BnaA01g26820D	BnaA01g24020D		BnaA01g37030D	BnaA01g30320D
BnaA01g26970D	BnaA01g24160D		BnaA01g37130D	BnaA01g30330D
BnaA01g27170D	BnaA01g24250D		BnaA01g37160D	BnaA01g30370D
BnaA01g27190D	BnaA01g24280D		BnaA01g37170D	BnaA01g30400D
BnaA01g27360D	BnaA01g24290D		BnaA01g37180D	BnaA01g30410D
BnaA01g27420D	BnaA01g24310D		BnaA01g37220D	BnaA01g30460D
BnaA01g27450D	BnaA01g24440D		BnaA01g37290D	BnaA01g30480D
BnaA01g27540D	BnaA01g24490D		BnaA02g00040D	BnaA01g30510D
BnaA01g27550D	BnaA01g24510D		BnaA02g00070D	BnaA01g30830D
BnaA01g27580D	BnaA01g24620D		BnaA02g00190D	BnaA01g30920D
BnaA01g27690D	BnaA01g24630D		BnaA02g00440D	BnaA01g30950D
BnaA01g27810D	BnaA01g24650D		BnaA02g00450D	BnaA01g31240D
BnaA01g27860D	BnaA01g24690D		BnaA02g00470D	BnaA01g31450D
BnaA01g27890D	BnaA01g24700D		BnaA02g00490D	BnaA01g31470D
BnaA01g27930D	BnaA01g24750D		BnaA02g00560D	BnaA01g31480D
BnaA01g27940D	BnaA01g24760D		BnaA02g00570D	BnaA01g31620D
BnaA01g27970D	BnaA01g24830D		BnaA02g00580D	BnaA01g31660D
BnaA01g27990D	BnaA01g24950D		BnaA02g00720D	BnaA01g31800D
BnaA01g28180D	BnaA01g25000D		BnaA02g00870D	BnaA01g31900D
BnaA01g28190D	BnaA01g25020D		BnaA02g01120D	BnaA01g31950D
BnaA01g28210D	BnaA01g25060D		BnaA02g01140D	BnaA01g31980D
BnaA01g28220D	BnaA01g25120D		BnaA02g01150D	BnaA01g32140D
BnaA01g28260D	BnaA01g25140D		BnaA02g01220D	BnaA01g32350D
BnaA01g28330D	BnaA01g25190D		BnaA02g01250D	BnaA01g32440D
BnaA01g28450D	BnaA01g25230D		BnaA02g01260D	BnaA01g32500D
BnaA01g28490D	BnaA01g25290D		BnaA02g01410D	BnaA01g32540D
BnaA01g28520D	BnaA01g25300D		BnaA02g01510D	BnaA01g32570D
BnaA01g28590D	BnaA01g25360D		BnaA02g01520D	BnaA01g32610D
BnaA01g28610D	BnaA01g25370D		BnaA02g01540D	BnaA01g32640D
BnaA01g28700D	BnaA01g25390D		BnaA02g01570D	BnaA01g32650D
BnaA01g28810D	BnaA01g25400D		BnaA02g01610D	BnaA01g32720D
BnaA01g28840D	BnaA01g25590D		BnaA02g01620D	BnaA01g32740D
BnaA01g28850D	BnaA01g25680D		BnaA02g01680D	BnaA01g32790D
BnaA01g28890D	BnaA01g25700D		BnaA02g01770D	BnaA01g32870D
BnaA01g28910D	BnaA01g25730D		BnaA02g01860D	BnaA01g32920D
BnaA01g28930D	BnaA01g25740D		BnaA02g01930D	BnaA01g32960D
BnaA01g28970D	BnaA01g25780D		BnaA02g01970D	BnaA01g33040D
BnaA01g29010D	BnaA01g25790D		BnaA02g01980D	BnaA01g33070D
BnaA01g29040D	BnaA01g25860D		BnaA02g02010D	BnaA01g33120D
BnaA01g29060D	BnaA01g25870D		BnaA02g02250D	BnaA01g33160D
BnaA01g29140D	BnaA01g25890D		BnaA02g02310D	BnaA01g33240D
BnaA01g29170D	BnaA01g25920D		BnaA02g02390D	BnaA01g33250D
BnaA01g29220D	BnaA01g26040D		BnaA02g02470D	BnaA01g33290D
BnaA01g29400D	BnaA01g26070D		BnaA02g02530D	BnaA01g33320D
BnaA01g29470D	BnaA01g26140D		BnaA02g02540D	BnaA01g33380D
BnaA01g29490D	BnaA01g26170D		BnaA02g02650D	BnaA01g33390D
BnaA01g29530D	BnaA01g26180D		BnaA02g02710D	BnaA01g33410D
BnaA01g29600D	BnaA01g26200D		BnaA02g02720D	BnaA01g33560D
BnaA01g29610D	BnaA01g26230D		BnaA02g02750D	BnaA01g33590D
BnaA01g29770D	BnaA01g26300D		BnaA02g02770D	BnaA01g33620D
BnaA01g29800D	BnaA01g26470D		BnaA02g03050D	BnaA01g33780D
BnaA01g29820D	BnaA01g26500D		BnaA02g03090D	BnaA01g33940D
BnaA01g29830D	BnaA01g26540D		BnaA02g03210D	BnaA01g33960D
BnaA01g29870D	BnaA01g26630D		BnaA02g03230D	BnaA01g34020D
BnaA01g29890D	BnaA01g26720D		BnaA02g03240D	BnaA01g34100D
BnaA01g29920D	BnaA01g26730D		BnaA02g03310D	BnaA01g34330D
BnaA01g29940D	BnaA01g26750D		BnaA02g03330D	BnaA01g34430D
BnaA01g29990D	BnaA01g26770D		BnaA02g03340D	BnaA01g34490D
BnaA01g30120D	BnaA01g26860D		BnaA02g03360D	BnaA01g34580D
BnaA01g30150D	BnaA01g26950D		BnaA02g03470D	BnaA01g34640D
BnaA01g30210D	BnaA01g27000D		BnaA02g03490D	BnaA01g34690D
BnaA01g30220D	BnaA01g27050D		BnaA02g03550D	BnaA01g34750D
BnaA01g30260D	BnaA01g27090D		BnaA02g03750D	BnaA01g34770D
BnaA01g30340D	BnaA01g27130D		BnaA02g03770D	BnaA01g34810D
BnaA01g30440D	BnaA01g27160D		BnaA02g03850D	BnaA01g35060D
BnaA01g30450D	BnaA01g27290D		BnaA02g03860D	BnaA01g35100D
BnaA01g30470D	BnaA01g27320D		BnaA02g03980D	BnaA01g35140D
BnaA01g30490D	BnaA01g27410D		BnaA02g04000D	BnaA01g35190D
BnaA01g30500D	BnaA01g27510D		BnaA02g04040D	BnaA01g35200D
BnaA01g30530D	BnaA01g27570D		BnaA02g04060D	BnaA01g35230D
BnaA01g30630D	BnaA01g27600D		BnaA02g04190D	BnaA01g35250D
BnaA01g30640D	BnaA01g27650D		BnaA02g04210D	BnaA01g35320D
BnaA01g30740D	BnaA01g27660D		BnaA02g04240D	BnaA01g35330D
BnaA01g30770D	BnaA01g27680D		BnaA02g04320D	BnaA01g35360D
BnaA01g30780D	BnaA01g27800D		BnaA02g04330D	BnaA01g35430D
BnaA01g30790D	BnaA01g28110D		BnaA02g04350D	BnaA01g35500D
BnaA01g30810D	BnaA01g28120D		BnaA02g04500D	BnaA01g35590D
BnaA01g30960D	BnaA01g28140D		BnaA02g04550D	BnaA01g35670D
BnaA01g31000D	BnaA01g28150D		BnaA02g04570D	BnaA01g35710D
BnaA01g31030D	BnaA01g28160D		BnaA02g04630D	BnaA01g35770D
BnaA01g31240D	BnaA01g28170D		BnaA02g04670D	BnaA01g35850D
BnaA01g31280D	BnaA01g28200D		BnaA02g04760D	BnaA01g35990D
BnaA01g31290D	BnaA01g28310D		BnaA02g04810D	BnaA01g36110D
BnaA01g31320D	BnaA01g28340D		BnaA02g04890D	BnaA01g36120D
BnaA01g31420D	BnaA01g28580D		BnaA02g04970D	BnaA01g36290D
BnaA01g31430D	BnaA01g28640D		BnaA02g05010D	BnaA01g36300D
BnaA01g31500D	BnaA01g28660D		BnaA02g05120D	BnaA01g36310D
BnaA01g31510D	BnaA01g28670D		BnaA02g05130D	BnaA01g36490D
BnaA01g31520D	BnaA01g28760D		BnaA02g05170D	BnaA01g36520D
BnaA01g31570D	BnaA01g28790D		BnaA02g05180D	BnaA01g36530D
BnaA01g31610D	BnaA01g28800D		BnaA02g05210D	BnaA01g36580D
BnaA01g31650D	BnaA01g28820D		BnaA02g05220D	BnaA01g36610D
BnaA01g31690D	BnaA01g28830D		BnaA02g05230D	BnaA01g36810D
BnaA01g31820D	BnaA01g28880D		BnaA02g05240D	BnaA01g36820D
BnaA01g31850D	BnaA01g28900D		BnaA02g05250D	BnaA01g36890D
BnaA01g31860D	BnaA01g28980D		BnaA02g05260D	BnaA01g36960D
BnaA01g31880D	BnaA01g29000D		BnaA02g05410D	BnaA01g37050D
BnaA01g32030D	BnaA01g29080D		BnaA02g05430D	BnaA01g37090D
BnaA01g32040D	BnaA01g29230D		BnaA02g05470D	BnaA01g37150D
BnaA01g32090D	BnaA01g29260D		BnaA02g05510D	BnaA01g37200D
BnaA01g32110D	BnaA01g29300D		BnaA02g05560D	BnaA01g37210D
BnaA01g32210D	BnaA01g29390D		BnaA02g05730D	BnaA01g37230D
BnaA01g32220D	BnaA01g29410D		BnaA02g05750D	BnaA01g37280D
BnaA01g32230D	BnaA01g29460D		BnaA02g05780D	BnaA01g37310D
BnaA01g32280D	BnaA01g29510D		BnaA02g05840D	BnaA01g37370D
BnaA01g32290D	BnaA01g29540D		BnaA02g06020D	BnaA01g37390D
BnaA01g32300D	BnaA01g29590D		BnaA02g06110D	BnaA01g37400D
BnaA01g32310D	BnaA01g29630D		BnaA02g06130D	BnaA02g00090D
BnaA01g32330D	BnaA01g29710D		BnaA02g06190D	BnaA02g00100D
BnaA01g32340D	BnaA01g29850D		BnaA02g06210D	BnaA02g00180D
BnaA01g32370D	BnaA01g29950D		BnaA02g06220D	BnaA02g00270D
BnaA01g32400D	BnaA01g29960D		BnaA02g06370D	BnaA02g00280D
BnaA01g32460D	BnaA01g30020D		BnaA02g06470D	BnaA02g00370D
BnaA01g32490D	BnaA01g30080D		BnaA02g06560D	BnaA02g00380D
BnaA01g32500D	BnaA01g30160D		BnaA02g06710D	BnaA02g00390D
BnaA01g32610D	BnaA01g30180D		BnaA02g06780D	BnaA02g00400D
BnaA01g32630D	BnaA01g30190D		BnaA02g06880D	BnaA02g00540D
BnaA01g32660D	BnaA01g30200D		BnaA02g06950D	BnaA02g00550D
BnaA01g32700D	BnaA01g30320D		BnaA02g07000D	BnaA02g00630D
BnaA01g32880D	BnaA01g30330D		BnaA02g07020D	BnaA02g00650D
BnaA01g32890D	BnaA01g30370D		BnaA02g07140D	BnaA02g00660D
BnaA01g32900D	BnaA01g30400D		BnaA02g07230D	BnaA02g00670D
BnaA01g32940D	BnaA01g30410D		BnaA02g07530D	BnaA02g00740D
BnaA01g33040D	BnaA01g30480D		BnaA02g07540D	BnaA02g00830D
BnaA01g33050D	BnaA01g30510D		BnaA02g07570D	BnaA02g00840D
BnaA01g33060D	BnaA01g30570D		BnaA02g07580D	BnaA02g00920D
BnaA01g33130D	BnaA01g30870D		BnaA02g07620D	BnaA02g01000D
BnaA01g33220D	BnaA01g30920D		BnaA02g07670D	BnaA02g01040D
BnaA01g33230D	BnaA01g30990D		BnaA02g07740D	BnaA02g01050D
BnaA01g33350D	BnaA01g31160D		BnaA02g07800D	BnaA02g01070D
BnaA01g33360D	BnaA01g31390D		BnaA02g07830D	BnaA02g01100D
BnaA01g33370D	BnaA01g31410D		BnaA02g07880D	BnaA02g01130D
BnaA01g33400D	BnaA01g31450D		BnaA02g07970D	BnaA02g01170D
BnaA01g33450D	BnaA01g31470D		BnaA02g08040D	BnaA02g01270D
BnaA01g33460D	BnaA01g31480D		BnaA02g08150D	BnaA02g01300D
BnaA01g33610D	BnaA01g31620D		BnaA02g08220D	BnaA02g01320D
BnaA01g33640D	BnaA01g31660D		BnaA02g08230D	BnaA02g01340D
BnaA01g33650D	BnaA01g31840D		BnaA02g08270D	BnaA02g01360D
BnaA01g33660D	BnaA01g31950D		BnaA02g08320D	BnaA02g01390D
BnaA01g33670D	BnaA01g31980D		BnaA02g08400D	BnaA02g01430D
BnaA01g33700D	BnaA01g31990D		BnaA02g08420D	BnaA02g01450D
BnaA01g33750D	BnaA01g32050D		BnaA02g08430D	BnaA02g01490D
BnaA01g33760D	BnaA01g32100D		BnaA02g08520D	BnaA02g01550D
BnaA01g33870D	BnaA01g32130D		BnaA02g08530D	BnaA02g01590D
BnaA01g33880D	BnaA01g32140D		BnaA02g08670D	BnaA02g01600D
BnaA01g33910D	BnaA01g32200D		BnaA02g08820D	BnaA02g01650D
BnaA01g34090D	BnaA01g32240D		BnaA02g09030D	BnaA02g01690D
BnaA01g34230D	BnaA01g32250D		BnaA02g09200D	BnaA02g01720D
BnaA01g34310D	BnaA01g32350D		BnaA02g09270D	BnaA02g01780D
BnaA01g34360D	BnaA01g32440D		BnaA02g09290D	BnaA02g01800D
BnaA01g34370D	BnaA01g32550D		BnaA02g09300D	BnaA02g01810D
BnaA01g34380D	BnaA01g32570D		BnaA02g09420D	BnaA02g01830D
BnaA01g34400D	BnaA01g32640D		BnaA02g09450D	BnaA02g01880D
BnaA01g34470D	BnaA01g32650D		BnaA02g09560D	BnaA02g02020D
BnaA01g34500D	BnaA01g32690D		BnaA02g09580D	BnaA02g02130D
BnaA01g34520D	BnaA01g32740D		BnaA02g09590D	BnaA02g02160D
BnaA01g34540D	BnaA01g32760D		BnaA02g09640D	BnaA02g02220D
BnaA01g34570D	BnaA01g32790D		BnaA02g09660D	BnaA02g02280D
BnaA01g34600D	BnaA01g32830D		BnaA02g09840D	BnaA02g02290D
BnaA01g34610D	BnaA01g32920D		BnaA02g09870D	BnaA02g02340D
BnaA01g34620D	BnaA01g33000D		BnaA02g10190D	BnaA02g02350D
BnaA01g34650D	BnaA01g33070D		BnaA02g10220D	BnaA02g02400D
BnaA01g34700D	BnaA01g33250D		BnaA02g10460D	BnaA02g02410D
BnaA01g34720D	BnaA01g33280D		BnaA02g10490D	BnaA02g02420D
BnaA01g34730D	BnaA01g33290D		BnaA02g10550D	BnaA02g02550D
BnaA01g34740D	BnaA01g33320D		BnaA02g10560D	BnaA02g02560D
BnaA01g34790D	BnaA01g33380D		BnaA02g10660D	BnaA02g02580D
BnaA01g34910D	BnaA01g33390D		BnaA02g10700D	BnaA02g02690D
BnaA01g34920D	BnaA01g33410D		BnaA02g10710D	BnaA02g02700D
BnaA01g34980D	BnaA01g33540D		BnaA02g10720D	BnaA02g02790D
BnaA01g35070D	BnaA01g33560D		BnaA02g10830D	BnaA02g02830D
BnaA01g35080D	BnaA01g33590D		BnaA02g10860D	BnaA02g02840D
BnaA01g35110D	BnaA01g33620D		BnaA02g10950D	BnaA02g02850D
BnaA01g35160D	BnaA01g33740D		BnaA02g11010D	BnaA02g02880D
BnaA01g35260D	BnaA01g33830D		BnaA02g11150D	BnaA02g02910D
BnaA01g35300D	BnaA01g33940D		BnaA02g11190D	BnaA02g02940D
BnaA01g35360D	BnaA01g33960D		BnaA02g11240D	BnaA02g02980D
BnaA01g35400D	BnaA01g33990D		BnaA02g11520D	BnaA02g03040D
BnaA01g35410D	BnaA01g34010D		BnaA02g11530D	BnaA02g03150D
BnaA01g35480D	BnaA01g34050D		BnaA02g11680D	BnaA02g03260D
BnaA01g35490D	BnaA01g34100D		BnaA02g11760D	BnaA02g03370D
BnaA01g35630D	BnaA01g34330D		BnaA02g11780D	BnaA02g03390D
BnaA01g35740D	BnaA01g34460D		BnaA02g11790D	BnaA02g03400D
BnaA01g35760D	BnaA01g34480D		BnaA02g11800D	BnaA02g03450D
BnaA01g35820D	BnaA01g34490D		BnaA02g11810D	BnaA02g03580D
BnaA01g35860D	BnaA01g34580D		BnaA02g11830D	BnaA02g03640D
BnaA01g35870D	BnaA01g34630D		BnaA02g11890D	BnaA02g03650D
BnaA01g35910D	BnaA01g34680D		BnaA02g11980D	BnaA02g03760D
BnaA01g36020D	BnaA01g34690D		BnaA02g12050D	BnaA02g03880D
BnaA01g36090D	BnaA01g34710D		BnaA02g12130D	BnaA02g03890D
BnaA01g36100D	BnaA01g34750D		BnaA02g12160D	BnaA02g03900D
BnaA01g36180D	BnaA01g34770D		BnaA02g12210D	BnaA02g03930D
BnaA01g36220D	BnaA01g34810D		BnaA02g12230D	BnaA02g04090D
BnaA01g36230D	BnaA01g34970D		BnaA02g12280D	BnaA02g04100D
BnaA01g36270D	BnaA01g35050D		BnaA02g12340D	BnaA02g04130D
BnaA01g36280D	BnaA01g35060D		BnaA02g12360D	BnaA02g04160D
BnaA01g36420D	BnaA01g35100D		BnaA02g12380D	BnaA02g04180D
BnaA01g36430D	BnaA01g35130D		BnaA02g12490D	BnaA02g04200D
BnaA01g36440D	BnaA01g35140D		BnaA02g12540D	BnaA02g04250D
BnaA01g36460D	BnaA01g35200D		BnaA02g12730D	BnaA02g04280D
BnaA01g36580D	BnaA01g35250D		BnaA02g12740D	BnaA02g04290D
BnaA01g36720D	BnaA01g35320D		BnaA02g12780D	BnaA02g04590D
BnaA01g36780D	BnaA01g35330D		BnaA02g12790D	BnaA02g04620D
BnaA01g36840D	BnaA01g35430D		BnaA02g12870D	BnaA02g04650D
BnaA01g36880D	BnaA01g35670D		BnaA02g12880D	BnaA02g04700D
BnaA01g36930D	BnaA01g35770D		BnaA02g13140D	BnaA02g04720D
BnaA01g36970D	BnaA01g35850D		BnaA02g13370D	BnaA02g04740D
BnaA01g36980D	BnaA01g35990D		BnaA02g13400D	BnaA02g04780D
BnaA01g37020D	BnaA01g36080D		BnaA02g13410D	BnaA02g04790D
BnaA01g37030D	BnaA01g36300D		BnaA02g13460D	BnaA02g04840D
BnaA01g37160D	BnaA01g36370D		BnaA02g13510D	BnaA02g04870D
BnaA01g37170D	BnaA01g36400D		BnaA02g13620D	BnaA02g04900D
BnaA01g37180D	BnaA01g36530D		BnaA02g13640D	BnaA02g04960D
BnaA01g37220D	BnaA01g36560D		BnaA02g13690D	BnaA02g04980D
BnaA01g37360D	BnaA01g36810D		BnaA02g13750D	BnaA02g05000D
BnaA02g00180D	BnaA01g36820D		BnaA02g13780D	BnaA02g05030D
BnaA02g00190D	BnaA01g36890D		BnaA02g13830D	BnaA02g05040D
BnaA02g00410D	BnaA01g36900D		BnaA02g13840D	BnaA02g05060D
BnaA02g00450D	BnaA01g36960D		BnaA02g13850D	BnaA02g05150D
BnaA02g00470D	BnaA01g37040D		BnaA02g13880D	BnaA02g05200D
BnaA02g00570D	BnaA01g37050D		BnaA02g13960D	BnaA02g05310D
BnaA02g00720D	BnaA01g37100D		BnaA02g13980D	BnaA02g05340D
BnaA02g00780D	BnaA01g37150D		BnaA02g14040D	BnaA02g05360D
BnaA02g00790D	BnaA01g37210D		BnaA02g14210D	BnaA02g05370D
BnaA02g00800D	BnaA01g37310D		BnaA02g14230D	BnaA02g05380D
BnaA02g00880D	BnaA01g37370D		BnaA02g14360D	BnaA02g05390D
BnaA02g00890D	BnaA01g37390D		BnaA02g14440D	BnaA02g05500D
BnaA02g00910D	BnaA02g00100D		BnaA02g14610D	BnaA02g05540D
BnaA02g00950D	BnaA02g00150D		BnaA02g14660D	BnaA02g05610D
BnaA02g01030D	BnaA02g00270D		BnaA02g14750D	BnaA02g05670D
BnaA02g01120D	BnaA02g00300D		BnaA02g14760D	BnaA02g05700D
BnaA02g01140D	BnaA02g00310D		BnaA02g14800D	BnaA02g05770D
BnaA02g01150D	BnaA02g00380D		BnaA02g14850D	BnaA02g05890D
BnaA02g01220D	BnaA02g00400D		BnaA02g14860D	BnaA02g05940D
BnaA02g01250D	BnaA02g00440D		BnaA02g14930D	BnaA02g05960D
BnaA02g01260D	BnaA02g00460D		BnaA02g14960D	BnaA02g06000D
BnaA02g01280D	BnaA02g00480D		BnaA02g15030D	BnaA02g06010D
BnaA02g01410D	BnaA02g00540D		BnaA02g15130D	BnaA02g06180D
BnaA02g01460D	BnaA02g00550D		BnaA02g15150D	BnaA02g06200D
BnaA02g01470D	BnaA02g00600D		BnaA02g15270D	BnaA02g06430D
BnaA02g01510D	BnaA02g00610D		BnaA02g15290D	BnaA02g06460D
BnaA02g01520D	BnaA02g00650D		BnaA02g15350D	BnaA02g06490D
BnaA02g01540D	BnaA02g00660D		BnaA02g15440D	BnaA02g06580D
BnaA02g01570D	BnaA02g00670D		BnaA02g15490D	BnaA02g06750D
BnaA02g01610D	BnaA02g00700D		BnaA02g15580D	BnaA02g06840D
BnaA02g01620D	BnaA02g00740D		BnaA02g15670D	BnaA02g06850D
BnaA02g01680D	BnaA02g00750D		BnaA02g15690D	BnaA02g06860D
BnaA02g01770D	BnaA02g00810D		BnaA02g15770D	BnaA02g06870D
BnaA02g01860D	BnaA02g00830D		BnaA02g15910D	BnaA02g06910D
BnaA02g01910D	BnaA02g00840D		BnaA02g15960D	BnaA02g06940D
BnaA02g01970D	BnaA02g00860D		BnaA02g15990D	BnaA02g07050D
BnaA02g01980D	BnaA02g00920D		BnaA02g16000D	BnaA02g07120D
BnaA02g02010D	BnaA02g01000D		BnaA02g16020D	BnaA02g07130D
BnaA02g02190D	BnaA02g01040D		BnaA02g16030D	BnaA02g07170D
BnaA02g02250D	BnaA02g01070D		BnaA02g16070D	BnaA02g07180D
BnaA02g02270D	BnaA02g01100D		BnaA02g16100D	BnaA02g07190D
BnaA02g02280D	BnaA02g01130D		BnaA02g16140D	BnaA02g07200D
BnaA02g02310D	BnaA02g01170D		BnaA02g16190D	BnaA02g07210D
BnaA02g02420D	BnaA02g01270D		BnaA02g16550D	BnaA02g07310D
BnaA02g02470D	BnaA02g01300D		BnaA02g16560D	BnaA02g07320D
BnaA02g02520D	BnaA02g01310D		BnaA02g16690D	BnaA02g07330D
BnaA02g02530D	BnaA02g01340D		BnaA02g16750D	BnaA02g07460D
BnaA02g02540D	BnaA02g01360D		BnaA02g16770D	BnaA02g07470D
BnaA02g02570D	BnaA02g01390D		BnaA02g16850D	BnaA02g07660D
BnaA02g02640D	BnaA02g01400D		BnaA02g17030D	BnaA02g07790D
BnaA02g02680D	BnaA02g01450D		BnaA02g17040D	BnaA02g07840D
BnaA02g02710D	BnaA02g01590D		BnaA02g17340D	BnaA02g07850D
BnaA02g02720D	BnaA02g01600D		BnaA02g17660D	BnaA02g07860D
BnaA02g02750D	BnaA02g01690D		BnaA02g17670D	BnaA02g07920D
BnaA02g02770D	BnaA02g01710D		BnaA02g17730D	BnaA02g07930D
BnaA02g02820D	BnaA02g01720D		BnaA02g18180D	BnaA02g07960D
BnaA02g02990D	BnaA02g01780D		BnaA02g18370D	BnaA02g07980D
BnaA02g03010D	BnaA02g01810D		BnaA02g18390D	BnaA02g07990D
BnaA02g03050D	BnaA02g01820D		BnaA02g18410D	BnaA02g08000D
BnaA02g03090D	BnaA02g01830D		BnaA02g18690D	BnaA02g08060D
BnaA02g03110D	BnaA02g01880D		BnaA02g18770D	BnaA02g08130D
BnaA02g03160D	BnaA02g02020D		BnaA02g18870D	BnaA02g08170D
BnaA02g03210D	BnaA02g02080D		BnaA02g18910D	BnaA02g08200D
BnaA02g03250D	BnaA02g02130D		BnaA02g19150D	BnaA02g08300D
BnaA02g03290D	BnaA02g02160D		BnaA02g19450D	BnaA02g08440D
BnaA02g03310D	BnaA02g02200D		BnaA02g19540D	BnaA02g08480D
BnaA02g03330D	BnaA02g02220D		BnaA02g19590D	BnaA02g08490D
BnaA02g03360D	BnaA02g02240D		BnaA02g19600D	BnaA02g08510D
BnaA02g03470D	BnaA02g02290D		BnaA02g19700D	BnaA02g08560D
BnaA02g03490D	BnaA02g02340D		BnaA02g19730D	BnaA02g08570D
BnaA02g03740D	BnaA02g02350D		BnaA02g19960D	BnaA02g08680D
BnaA02g03750D	BnaA02g02370D		BnaA02g19970D	BnaA02g08790D
BnaA02g03770D	BnaA02g02400D		BnaA02g20120D	BnaA02g08900D
BnaA02g03780D	BnaA02g02410D		BnaA02g20180D	BnaA02g09170D
BnaA02g03790D	BnaA02g02440D		BnaA02g20210D	BnaA02g09180D
BnaA02g03850D	BnaA02g02460D		BnaA02g20240D	BnaA02g09370D
BnaA02g03860D	BnaA02g02550D		BnaA02g20410D	BnaA02g09390D
BnaA02g03970D	BnaA02g02560D		BnaA02g20580D	BnaA02g09460D
BnaA02g03980D	BnaA02g02580D		BnaA02g20620D	BnaA02g09470D
BnaA02g03990D	BnaA02g02620D		BnaA02g20640D	BnaA02g09490D
BnaA02g04000D	BnaA02g02630D		BnaA02g20670D	BnaA02g09530D
BnaA02g04040D	BnaA02g02790D		BnaA02g21060D	BnaA02g09540D
BnaA02g04190D	BnaA02g02830D		BnaA02g21170D	BnaA02g09600D
BnaA02g04210D	BnaA02g02840D		BnaA02g21230D	BnaA02g09680D
BnaA02g04240D	BnaA02g02850D		BnaA02g21510D	BnaA02g09700D
BnaA02g04260D	BnaA02g02880D		BnaA02g21530D	BnaA02g09810D
BnaA02g04320D	BnaA02g02940D		BnaA02g21550D	BnaA02g09820D
BnaA02g04330D	BnaA02g02980D		BnaA02g21660D	BnaA02g09880D
BnaA02g04340D	BnaA02g03030D		BnaA02g21710D	BnaA02g09890D
BnaA02g04350D	BnaA02g03040D		BnaA02g21750D	BnaA02g09980D
BnaA02g04450D	BnaA02g03080D		BnaA02g21770D	BnaA02g10050D
BnaA02g04500D	BnaA02g03140D		BnaA02g21850D	BnaA02g10130D
BnaA02g04550D	BnaA02g03170D		BnaA02g21890D	BnaA02g10290D
BnaA02g04630D	BnaA02g03180D		BnaA02g21970D	BnaA02g10300D
BnaA02g04670D	BnaA02g03190D		BnaA02g21980D	BnaA02g10320D
BnaA02g04730D	BnaA02g03200D		BnaA02g22020D	BnaA02g10330D
BnaA02g04760D	BnaA02g03260D		BnaA02g22030D	BnaA02g10360D
BnaA02g04780D	BnaA02g03300D		BnaA02g22110D	BnaA02g10410D
BnaA02g04810D	BnaA02g03350D		BnaA02g22240D	BnaA02g10420D
BnaA02g04890D	BnaA02g03370D		BnaA02g22340D	BnaA02g10430D
BnaA02g04970D	BnaA02g03390D		BnaA02g22470D	BnaA02g10500D
BnaA02g05120D	BnaA02g03400D		BnaA02g22480D	BnaA02g10630D
BnaA02g05130D	BnaA02g03430D		BnaA02g22630D	BnaA02g10690D
BnaA02g05170D	BnaA02g03450D		BnaA02g22690D	BnaA02g10740D
BnaA02g05190D	BnaA02g03510D		BnaA02g22770D	BnaA02g10800D
BnaA02g05210D	BnaA02g03570D		BnaA02g22840D	BnaA02g10810D
BnaA02g05220D	BnaA02g03580D		BnaA02g22960D	BnaA02g10850D
BnaA02g05230D	BnaA02g03610D		BnaA02g23000D	BnaA02g10880D
BnaA02g05240D	BnaA02g03640D		BnaA02g23020D	BnaA02g10890D
BnaA02g05260D	BnaA02g03650D		BnaA02g23050D	BnaA02g10970D
BnaA02g05270D	BnaA02g03760D		BnaA02g23230D	BnaA02g10980D
BnaA02g05300D	BnaA02g03880D		BnaA02g23330D	BnaA02g10990D
BnaA02g05320D	BnaA02g03900D		BnaA02g23400D	BnaA02g11000D
BnaA02g05330D	BnaA02g03930D		BnaA02g23490D	BnaA02g11080D
BnaA02g05410D	BnaA02g04090D		BnaA02g23630D	BnaA02g11200D
BnaA02g05420D	BnaA02g04120D		BnaA02g23650D	BnaA02g11400D
BnaA02g05430D	BnaA02g04130D		BnaA02g23670D	BnaA02g11610D
BnaA02g05510D	BnaA02g04150D		BnaA02g23720D	BnaA02g11650D
BnaA02g05560D	BnaA02g04180D		BnaA02g23870D	BnaA02g11690D
BnaA02g05580D	BnaA02g04200D		BnaA02g23910D	BnaA02g11710D
BnaA02g05660D	BnaA02g04250D		BnaA02g24040D	BnaA02g11770D
BnaA02g05780D	BnaA02g04280D		BnaA02g24100D	BnaA02g11850D
BnaA02g05840D	BnaA02g04290D		BnaA02g24140D	BnaA02g11870D
BnaA02g05980D	BnaA02g04300D		BnaA02g24410D	BnaA02g11900D
BnaA02g06020D	BnaA02g04440D		BnaA02g24470D	BnaA02g11920D
BnaA02g06130D	BnaA02g04580D		BnaA02g24500D	BnaA02g11950D
BnaA02g06190D	BnaA02g04590D		BnaA02g24540D	BnaA02g12010D
BnaA02g06210D	BnaA02g04610D		BnaA02g24640D	BnaA02g12060D
BnaA02g06220D	BnaA02g04650D		BnaA02g24720D	BnaA02g12070D
BnaA02g06230D	BnaA02g04690D		BnaA02g24780D	BnaA02g12350D
BnaA02g06350D	BnaA02g04700D		BnaA02g24900D	BnaA02g12370D
BnaA02g06370D	BnaA02g04710D		BnaA02g24910D	BnaA02g12390D
BnaA02g06470D	BnaA02g04720D		BnaA02g24930D	BnaA02g12440D
BnaA02g06560D	BnaA02g04740D		BnaA02g25110D	BnaA02g12470D
BnaA02g06610D	BnaA02g04750D		BnaA02g25120D	BnaA02g12480D
BnaA02g06620D	BnaA02g04790D		BnaA02g25150D	BnaA02g12560D
BnaA02g06660D	BnaA02g04800D		BnaA02g25400D	BnaA02g12570D
BnaA02g06670D	BnaA02g04870D		BnaA02g25520D	BnaA02g12600D
BnaA02g06680D	BnaA02g04900D		BnaA02g25550D	BnaA02g12760D
BnaA02g06690D	BnaA02g04910D		BnaA02g25740D	BnaA02g12770D
BnaA02g06710D	BnaA02g04920D		BnaA02g25840D	BnaA02g12800D
BnaA02g06780D	BnaA02g04940D		BnaA02g25880D	BnaA02g12820D
BnaA02g06880D	BnaA02g04950D		BnaA02g25890D	BnaA02g12830D
BnaA02g06890D	BnaA02g05000D		BnaA02g25960D	BnaA02g12840D
BnaA02g06960D	BnaA02g05010D		BnaA02g26140D	BnaA02g12970D
BnaA02g07020D	BnaA02g05040D		BnaA02g26250D	BnaA02g13070D
BnaA02g07040D	BnaA02g05060D		BnaA02g26260D	BnaA02g13080D
BnaA02g07070D	BnaA02g05070D		BnaA02g26280D	BnaA02g13100D
BnaA02g07080D	BnaA02g05090D		BnaA02g26440D	BnaA02g13220D
BnaA02g07140D	BnaA02g05160D		BnaA02g26570D	BnaA02g13250D
BnaA02g07230D	BnaA02g05200D		BnaA02g26610D	BnaA02g13300D
BnaA02g07240D	BnaA02g05310D		BnaA02g26620D	BnaA02g13320D
BnaA02g07370D	BnaA02g05340D		BnaA02g26660D	BnaA02g13350D
BnaA02g07540D	BnaA02g05360D		BnaA02g26680D	BnaA02g13380D
BnaA02g07600D	BnaA02g05440D		BnaA02g26730D	BnaA02g13440D
BnaA02g07620D	BnaA02g05470D		BnaA02g26780D	BnaA02g13540D
BnaA02g07630D	BnaA02g05540D		BnaA02g26810D	BnaA02g13610D
BnaA02g07640D	BnaA02g05590D		BnaA02g26890D	BnaA02g13790D
BnaA02g07740D	BnaA02g05610D		BnaA02g26930D	BnaA02g13920D
BnaA02g07780D	BnaA02g05700D		BnaA02g26960D	BnaA02g14060D
BnaA02g07800D	BnaA02g05730D		BnaA02g26980D	BnaA02g14110D
BnaA02g07870D	BnaA02g05820D		BnaA02g27000D	BnaA02g14220D
BnaA02g07910D	BnaA02g05910D		BnaA02g27020D	BnaA02g14270D
BnaA02g07920D	BnaA02g05940D		BnaA02g27070D	BnaA02g14280D
BnaA02g07970D	BnaA02g05960D		BnaA02g27260D	BnaA02g14310D
BnaA02g08040D	BnaA02g06000D		BnaA02g27300D	BnaA02g14320D
BnaA02g08140D	BnaA02g06170D		BnaA02g27430D	BnaA02g14340D
BnaA02g08200D	BnaA02g06200D		BnaA02g27480D	BnaA02g14410D
BnaA02g08230D	BnaA02g06390D		BnaA02g27540D	BnaA02g14420D
BnaA02g08270D	BnaA02g06460D		BnaA02g27550D	BnaA02g14480D
BnaA02g08320D	BnaA02g06490D		BnaA02g27630D	BnaA02g14490D
BnaA02g08360D	BnaA02g06550D		BnaA02g27680D	BnaA02g14530D
BnaA02g08390D	BnaA02g06600D		BnaA02g27730D	BnaA02g14540D
BnaA02g08400D	BnaA02g06750D		BnaA02g27830D	BnaA02g14570D
BnaA02g08420D	BnaA02g06840D		BnaA02g27860D	BnaA02g14580D
BnaA02g08430D	BnaA02g06860D		BnaA02g27870D	BnaA02g14620D
BnaA02g08440D	BnaA02g06930D		BnaA02g27920D	BnaA02g14630D
BnaA02g08520D	BnaA02g06940D		BnaA02g27970D	BnaA02g14680D
BnaA02g08530D	BnaA02g06990D		BnaA02g27990D	BnaA02g14700D
BnaA02g08540D	BnaA02g07050D		BnaA02g28020D	BnaA02g14770D
BnaA02g08850D	BnaA02g07090D		BnaA02g28050D	BnaA02g14790D
BnaA02g08990D	BnaA02g07120D		BnaA02g28080D	BnaA02g14870D
BnaA02g09030D	BnaA02g07130D		BnaA02g28160D	BnaA02g14980D
BnaA02g09060D	BnaA02g07170D		BnaA02g28260D	BnaA02g14990D
BnaA02g09150D	BnaA02g07190D		BnaA02g28270D	BnaA02g15070D
BnaA02g09200D	BnaA02g07210D		BnaA02g28300D	BnaA02g15090D
BnaA02g09260D	BnaA02g07320D		BnaA02g28380D	BnaA02g15110D
BnaA02g09270D	BnaA02g07330D		BnaA02g28780D	BnaA02g15140D
BnaA02g09280D	BnaA02g07340D		BnaA02g28880D	BnaA02g15170D
BnaA02g09290D	BnaA02g07440D		BnaA02g28900D	BnaA02g15190D
BnaA02g09300D	BnaA02g07470D		BnaA02g28960D	BnaA02g15230D
BnaA02g09410D	BnaA02g07570D		BnaA02g28980D	BnaA02g15250D
BnaA02g09420D	BnaA02g07730D		BnaA02g29030D	BnaA02g15260D
BnaA02g09450D	BnaA02g07790D		BnaA02g29040D	BnaA02g15320D
BnaA02g09480D	BnaA02g07840D		BnaA02g29050D	BnaA02g15460D
BnaA02g09520D	BnaA02g07850D		BnaA02g29210D	BnaA02g15510D
BnaA02g09580D	BnaA02g07900D		BnaA02g29300D	BnaA02g15550D
BnaA02g09590D	BnaA02g07930D		BnaA02g29610D	BnaA02g15590D
BnaA02g09630D	BnaA02g07940D		BnaA02g29640D	BnaA02g15610D
BnaA02g09640D	BnaA02g07960D		BnaA02g29660D	BnaA02g15620D
BnaA02g09660D	BnaA02g07980D		BnaA02g29770D	BnaA02g15710D
BnaA02g09840D	BnaA02g07990D		BnaA02g29910D	BnaA02g15750D
BnaA02g10000D	BnaA02g08000D		BnaA02g29950D	BnaA02g15760D
BnaA02g10190D	BnaA02g08010D		BnaA02g30100D	BnaA02g15780D
BnaA02g10220D	BnaA02g08020D		BnaA02g30300D	BnaA02g15820D
BnaA02g10490D	BnaA02g08090D		BnaA02g30360D	BnaA02g15830D
BnaA02g10570D	BnaA02g08160D		BnaA02g30370D	BnaA02g15840D
BnaA02g10660D	BnaA02g08170D		BnaA02g30400D	BnaA02g15880D
BnaA02g10700D	BnaA02g08300D		BnaA02g30450D	BnaA02g15980D
BnaA02g10710D	BnaA02g08330D		BnaA02g30620D	BnaA02g16170D
BnaA02g10720D	BnaA02g08470D		BnaA02g30940D	BnaA02g16220D
BnaA02g10950D	BnaA02g08480D		BnaA02g30980D	BnaA02g16290D
BnaA02g11010D	BnaA02g08490D		BnaA02g31140D	BnaA02g16360D
BnaA02g11150D	BnaA02g08510D		BnaA02g31150D	BnaA02g16400D
BnaA02g11470D	BnaA02g08560D		BnaA02g31160D	BnaA02g16420D
BnaA02g11520D	BnaA02g08660D		BnaA02g31210D	BnaA02g16450D
BnaA02g11530D	BnaA02g08790D		BnaA02g31290D	BnaA02g16520D
BnaA02g11590D	BnaA02g08800D		BnaA02g31300D	BnaA02g16590D
BnaA02g11600D	BnaA02g08840D		BnaA02g31370D	BnaA02g16680D
BnaA02g11620D	BnaA02g08890D		BnaA02g31390D	BnaA02g16700D
BnaA02g11650D	BnaA02g08900D		BnaA02g31430D	BnaA02g16740D
BnaA02g11680D	BnaA02g08940D		BnaA02g31450D	BnaA02g16760D
BnaA02g11780D	BnaA02g08950D		BnaA02g31540D	BnaA02g16780D
BnaA02g11800D	BnaA02g09020D		BnaA02g31550D	BnaA02g16910D
BnaA02g11810D	BnaA02g09170D		BnaA02g31630D	BnaA02g16930D
BnaA02g11850D	BnaA02g09180D		BnaA02g31820D	BnaA02g16970D
BnaA02g11890D	BnaA02g09370D		BnaA02g31870D	BnaA02g17000D
BnaA02g11970D	BnaA02g09390D		BnaA02g31950D	BnaA02g17110D
BnaA02g12000D	BnaA02g09400D		BnaA02g32010D	BnaA02g17130D
BnaA02g12050D	BnaA02g09460D		BnaA02g32070D	BnaA02g17160D
BnaA02g12230D	BnaA02g09490D		BnaA02g32080D	BnaA02g17180D
BnaA02g12240D	BnaA02g09530D		BnaA02g32090D	BnaA02g17190D
BnaA02g12250D	BnaA02g09540D		BnaA02g32150D	BnaA02g17240D
BnaA02g12280D	BnaA02g09680D		BnaA02g32170D	BnaA02g17260D
BnaA02g12320D	BnaA02g09700D		BnaA02g32220D	BnaA02g17320D
BnaA02g12340D	BnaA02g09850D		BnaA02g32320D	BnaA02g17370D
BnaA02g12360D	BnaA02g09880D		BnaA02g32360D	BnaA02g17390D
BnaA02g12380D	BnaA02g09890D		BnaA02g32460D	BnaA02g17410D
BnaA02g12490D	BnaA02g09960D		BnaA02g32620D	BnaA02g17480D
BnaA02g12540D	BnaA02g09980D		BnaA02g32650D	BnaA02g17550D
BnaA02g12620D	BnaA02g10030D		BnaA02g32730D	BnaA02g17560D
BnaA02g12700D	BnaA02g10040D		BnaA02g32780D	BnaA02g17630D
BnaA02g12740D	BnaA02g10050D		BnaA02g32800D	BnaA02g17830D
BnaA02g12780D	BnaA02g10130D		BnaA02g32840D	BnaA02g17920D
BnaA02g12790D	BnaA02g10210D		BnaA02g32870D	BnaA02g17970D
BnaA02g12870D	BnaA02g10270D		BnaA02g33060D	BnaA02g18050D
BnaA02g12880D	BnaA02g10290D		BnaA02g33200D	BnaA02g18060D
BnaA02g12890D	BnaA02g10300D		BnaA02g33240D	BnaA02g18080D
BnaA02g12970D	BnaA02g10410D		BnaA02g33270D	BnaA02g18160D
BnaA02g13110D	BnaA02g10420D		BnaA02g33290D	BnaA02g18190D
BnaA02g13120D	BnaA02g10500D		BnaA02g33380D	BnaA02g18240D
BnaA02g13140D	BnaA02g10550D		BnaA02g33450D	BnaA02g18250D
BnaA02g13270D	BnaA02g10690D		BnaA02g33550D	BnaA02g18280D
BnaA02g13370D	BnaA02g10740D		BnaA02g33710D	BnaA02g18320D
BnaA02g13380D	BnaA02g10800D		BnaA02g33880D	BnaA02g18350D
BnaA02g13400D	BnaA02g10810D		BnaA02g33910D	BnaA02g18380D
BnaA02g13410D	BnaA02g10850D		BnaA02g33930D	BnaA02g18430D
BnaA02g13420D	BnaA02g10880D		BnaA02g33980D	BnaA02g18490D
BnaA02g13460D	BnaA02g10900D		BnaA02g34070D	BnaA02g18510D
BnaA02g13510D	BnaA02g10970D		BnaA02g34090D	BnaA02g18700D
BnaA02g13620D	BnaA02g10980D		BnaA02g34110D	BnaA02g18750D
BnaA02g13690D	BnaA02g10990D		BnaA02g34120D	BnaA02g18760D
BnaA02g13720D	BnaA02g11080D		BnaA02g34140D	BnaA02g18780D
BnaA02g13740D	BnaA02g11250D		BnaA02g34150D	BnaA02g18830D
BnaA02g13750D	BnaA02g11280D		BnaA02g34230D	BnaA02g18840D
BnaA02g13770D	BnaA02g11340D		BnaA02g34370D	BnaA02g18850D
BnaA02g13780D	BnaA02g11400D		BnaA02g34440D	BnaA02g18860D
BnaA02g13830D	BnaA02g11410D		BnaA02g34560D	BnaA02g18950D
BnaA02g13840D	BnaA02g11500D		BnaA02g34580D	BnaA02g18970D
BnaA02g13850D	BnaA02g11510D		BnaA02g34640D	BnaA02g19090D
BnaA02g13880D	BnaA02g11710D		BnaA02g34780D	BnaA02g19200D
BnaA02g14040D	BnaA02g11740D		BnaA02g34870D	BnaA02g19210D
BnaA02g14230D	BnaA02g11760D		BnaA02g34960D	BnaA02g19300D
BnaA02g14270D	BnaA02g11770D		BnaA02g34970D	BnaA02g19320D
BnaA02g14360D	BnaA02g11790D		BnaA02g34980D	BnaA02g19440D
BnaA02g14460D	BnaA02g11870D		BnaA02g35010D	BnaA02g19470D
BnaA02g14510D	BnaA02g11900D		BnaA02g35050D	BnaA02g19500D
BnaA02g14600D	BnaA02g11920D		BnaA02g35120D	BnaA02g19510D
BnaA02g14660D	BnaA02g11950D		BnaA02g35160D	BnaA02g19580D
BnaA02g14720D	BnaA02g12010D		BnaA02g35440D	BnaA02g19760D
BnaA02g14760D	BnaA02g12040D		BnaA02g35610D	BnaA02g19770D
BnaA02g14790D	BnaA02g12070D		BnaA02g35620D	BnaA02g19800D
BnaA02g14800D	BnaA02g12080D		BnaA02g35630D	BnaA02g19930D
BnaA02g14850D	BnaA02g12100D		BnaA02g35710D	BnaA02g19950D
BnaA02g14860D	BnaA02g12130D		BnaA02g35730D	BnaA02g20020D
BnaA02g14870D	BnaA02g12150D		BnaA02g35740D	BnaA02g20140D
BnaA02g14930D	BnaA02g12170D		BnaA02g35760D	BnaA02g20170D
BnaA02g14960D	BnaA02g12180D		BnaA02g35770D	BnaA02g20230D
BnaA02g15020D	BnaA02g12210D		BnaA02g35820D	BnaA02g20250D
BnaA02g15030D	BnaA02g12390D		BnaA02g35930D	BnaA02g20420D
BnaA02g15130D	BnaA02g12430D		BnaA02g35970D	BnaA02g20470D
BnaA02g15150D	BnaA02g12440D		BnaA02g35980D	BnaA02g20500D
BnaA02g15270D	BnaA02g12480D		BnaA02g36130D	BnaA02g20510D
BnaA02g15280D	BnaA02g12560D		BnaA02g36180D	BnaA02g20530D
BnaA02g15290D	BnaA02g12570D		BnaA02g36240D	BnaA02g20540D
BnaA02g15330D	BnaA02g12600D		BnaA02g36250D	BnaA02g20550D
BnaA02g15350D	BnaA02g12680D		BnaA02g36270D	BnaA02g20630D
BnaA02g15370D	BnaA02g12720D		BnaA02g36470D	BnaA02g20690D
BnaA02g15400D	BnaA02g12730D		BnaA02g36480D	BnaA02g20750D
BnaA02g15410D	BnaA02g12760D		BnaA02g36820D	BnaA02g20760D
BnaA02g15440D	BnaA02g12800D		BnaA02g36950D	BnaA02g20860D
BnaA02g15450D	BnaA02g12810D		BnaA02g37010D	BnaA02g20950D
BnaA02g15690D	BnaA02g12820D		BnaA02g37030D	BnaA02g21020D
BnaA02g15700D	BnaA02g12960D		BnaA03g00260D	BnaA02g21070D
BnaA02g15770D	BnaA02g12980D		BnaA03g00300D	BnaA02g21120D
BnaA02g15800D	BnaA02g12990D		BnaA03g00310D	BnaA02g21300D
BnaA02g15870D	BnaA02g13050D		BnaA03g00320D	BnaA02g21340D
BnaA02g15900D	BnaA02g13070D		BnaA03g00350D	BnaA02g21480D
BnaA02g15910D	BnaA02g13080D		BnaA03g00390D	BnaA02g21560D
BnaA02g15920D	BnaA02g13100D		BnaA03g00420D	BnaA02g21610D
BnaA02g15960D	BnaA02g13220D		BnaA03g00550D	BnaA02g21690D
BnaA02g15990D	BnaA02g13230D		BnaA03g00560D	BnaA02g21730D
BnaA02g16000D	BnaA02g13250D		BnaA03g00570D	BnaA02g21810D
BnaA02g16020D	BnaA02g13260D		BnaA03g00670D	BnaA02g21930D
BnaA02g16070D	BnaA02g13300D		BnaA03g00720D	BnaA02g21960D
BnaA02g16100D	BnaA02g13310D		BnaA03g00730D	BnaA02g21990D
BnaA02g16120D	BnaA02g13320D		BnaA03g00790D	BnaA02g22140D
BnaA02g16190D	BnaA02g13350D		BnaA03g00820D	BnaA02g22310D
BnaA02g16200D	BnaA02g13540D		BnaA03g00830D	BnaA02g22320D
BnaA02g16240D	BnaA02g13610D		BnaA03g00840D	BnaA02g22350D
BnaA02g16320D	BnaA02g13630D		BnaA03g00900D	BnaA02g22360D
BnaA02g16330D	BnaA02g13640D		BnaA03g00910D	BnaA02g22370D
BnaA02g16510D	BnaA02g13900D		BnaA03g00990D	BnaA02g22400D
BnaA02g16550D	BnaA02g13920D		BnaA03g01080D	BnaA02g22450D
BnaA02g16560D	BnaA02g14020D		BnaA03g01100D	BnaA02g22490D
BnaA02g16750D	BnaA02g14060D		BnaA03g01110D	BnaA02g22500D
BnaA02g16860D	BnaA02g14110D		BnaA03g01200D	BnaA02g22520D
BnaA02g16980D	BnaA02g14150D		BnaA03g01230D	BnaA02g22550D
BnaA02g17340D	BnaA02g14180D		BnaA03g01350D	BnaA02g22560D
BnaA02g17360D	BnaA02g14250D		BnaA03g01360D	BnaA02g22810D
BnaA02g17660D	BnaA02g14280D		BnaA03g01420D	BnaA02g23010D
BnaA02g17670D	BnaA02g14310D		BnaA03g01450D	BnaA02g23290D
BnaA02g17730D	BnaA02g14320D		BnaA03g01460D	BnaA02g23440D
BnaA02g17740D	BnaA02g14340D		BnaA03g01480D	BnaA02g23460D
BnaA02g17800D	BnaA02g14400D		BnaA03g01490D	BnaA02g23500D
BnaA02g17890D	BnaA02g14490D		BnaA03g01510D	BnaA02g23510D
BnaA02g18180D	BnaA02g14500D		BnaA03g01540D	BnaA02g23600D
BnaA02g18230D	BnaA02g14550D		BnaA03g01650D	BnaA02g23620D
BnaA02g18360D	BnaA02g14570D		BnaA03g01690D	BnaA02g23660D
BnaA02g18370D	BnaA02g14580D		BnaA03g01760D	BnaA02g23780D
BnaA02g18390D	BnaA02g14620D		BnaA03g01790D	BnaA02g23810D
BnaA02g18410D	BnaA02g14630D		BnaA03g01870D	BnaA02g23860D
BnaA02g18450D	BnaA02g14670D		BnaA03g01910D	BnaA02g23880D
BnaA02g18530D	BnaA02g14690D		BnaA03g02010D	BnaA02g24000D
BnaA02g18540D	BnaA02g14700D		BnaA03g02040D	BnaA02g24010D
BnaA02g18610D	BnaA02g14710D		BnaA03g02060D	BnaA02g24110D
BnaA02g18630D	BnaA02g14780D		BnaA03g02160D	BnaA02g24150D
BnaA02g18690D	BnaA02g14830D		BnaA03g02200D	BnaA02g24160D
BnaA02g18720D	BnaA02g14840D		BnaA03g02250D	BnaA02g24170D
BnaA02g18750D	BnaA02g14980D		BnaA03g02400D	BnaA02g24180D
BnaA02g18770D	BnaA02g14990D		BnaA03g02450D	BnaA02g24310D
BnaA02g18790D	BnaA02g15070D		BnaA03g02460D	BnaA02g24350D
BnaA02g18870D	BnaA02g15090D		BnaA03g02620D	BnaA02g24430D
BnaA02g18890D	BnaA02g15140D		BnaA03g02630D	BnaA02g24510D
BnaA02g18900D	BnaA02g15190D		BnaA03g02760D	BnaA02g24550D
BnaA02g18950D	BnaA02g15230D		BnaA03g02840D	BnaA02g24730D
BnaA02g19070D	BnaA02g15250D		BnaA03g02850D	BnaA02g24840D
BnaA02g19290D	BnaA02g15320D		BnaA03g02910D	BnaA02g25020D
BnaA02g19330D	BnaA02g15460D		BnaA03g03010D	BnaA02g25050D
BnaA02g19410D	BnaA02g15510D		BnaA03g03100D	BnaA02g25070D
BnaA02g19450D	BnaA02g15530D		BnaA03g03130D	BnaA02g25200D
BnaA02g19520D	BnaA02g15580D		BnaA03g03140D	BnaA02g25210D
BnaA02g19540D	BnaA02g15600D		BnaA03g03160D	BnaA02g25230D
BnaA02g19590D	BnaA02g15620D		BnaA03g03230D	BnaA02g25390D
BnaA02g19650D	BnaA02g15640D		BnaA03g03240D	BnaA02g25430D
BnaA02g19700D	BnaA02g15650D		BnaA03g03440D	BnaA02g25570D
BnaA02g19730D	BnaA02g15710D		BnaA03g03530D	BnaA02g25600D
BnaA02g19790D	BnaA02g15760D		BnaA03g03540D	BnaA02g25730D
BnaA02g19930D	BnaA02g15780D		BnaA03g03600D	BnaA02g25750D
BnaA02g20040D	BnaA02g15820D		BnaA03g03620D	BnaA02g25780D
BnaA02g20120D	BnaA02g15830D		BnaA03g03740D	BnaA02g25790D
BnaA02g20180D	BnaA02g15880D		BnaA03g03770D	BnaA02g25820D
BnaA02g20210D	BnaA02g15930D		BnaA03g03850D	BnaA02g25830D
BnaA02g20240D	BnaA02g15940D		BnaA03g03950D	BnaA02g25910D
BnaA02g20440D	BnaA02g15950D		BnaA03g03990D	BnaA02g25940D
BnaA02g20480D	BnaA02g15970D		BnaA03g04160D	BnaA02g26000D
BnaA02g20580D	BnaA02g16180D		BnaA03g04190D	BnaA02g26100D
BnaA02g20620D	BnaA02g16290D		BnaA03g04250D	BnaA02g26130D
BnaA02g20640D	BnaA02g16310D		BnaA03g04280D	BnaA02g26200D
BnaA02g20680D	BnaA02g16360D		BnaA03g04290D	BnaA02g26210D
BnaA02g20920D	BnaA02g16420D		BnaA03g04310D	BnaA02g26290D
BnaA02g21060D	BnaA02g16440D		BnaA03g04320D	BnaA02g26380D
BnaA02g21080D	BnaA02g16450D		BnaA03g04340D	BnaA02g26390D
BnaA02g21170D	BnaA02g16520D		BnaA03g04370D	BnaA02g26400D
BnaA02g21230D	BnaA02g16590D		BnaA03g04380D	BnaA02g26450D
BnaA02g21370D	BnaA02g16610D		BnaA03g04390D	BnaA02g26470D
BnaA02g21510D	BnaA02g16680D		BnaA03g04410D	BnaA02g26480D
BnaA02g21550D	BnaA02g16700D		BnaA03g04420D	BnaA02g26490D
BnaA02g21610D	BnaA02g16740D		BnaA03g04460D	BnaA02g26550D
BnaA02g21660D	BnaA02g16970D		BnaA03g04480D	BnaA02g26640D
BnaA02g21720D	BnaA02g17180D		BnaA03g04520D	BnaA02g26690D
BnaA02g21750D	BnaA02g17190D		BnaA03g04670D	BnaA02g26990D
BnaA02g21770D	BnaA02g17200D		BnaA03g04680D	BnaA02g27160D
BnaA02g21820D	BnaA02g17240D		BnaA03g04730D	BnaA02g27200D
BnaA02g21840D	BnaA02g17260D		BnaA03g04810D	BnaA02g27230D
BnaA02g21850D	BnaA02g17270D		BnaA03g04940D	BnaA02g27380D
BnaA02g21890D	BnaA02g17370D		BnaA03g04950D	BnaA02g27490D
BnaA02g21920D	BnaA02g17390D		BnaA03g05070D	BnaA02g27530D
BnaA02g21970D	BnaA02g17410D		BnaA03g05170D	BnaA02g27600D
BnaA02g21980D	BnaA02g17450D		BnaA03g05290D	BnaA02g27620D
BnaA02g22020D	BnaA02g17480D		BnaA03g05300D	BnaA02g27740D
BnaA02g22030D	BnaA02g17550D		BnaA03g05330D	BnaA02g27850D
BnaA02g22110D	BnaA02g17560D		BnaA03g05430D	BnaA02g27900D
BnaA02g22240D	BnaA02g17710D		BnaA03g05450D	BnaA02g27980D
BnaA02g22340D	BnaA02g17720D		BnaA03g05570D	BnaA02g28090D
BnaA02g22480D	BnaA02g17880D		BnaA03g05580D	BnaA02g28130D
BnaA02g22560D	BnaA02g17970D		BnaA03g05590D	BnaA02g28150D
BnaA02g22660D	BnaA02g18110D		BnaA03g05660D	BnaA02g28170D
BnaA02g22680D	BnaA02g18160D		BnaA03g05720D	BnaA02g28290D
BnaA02g22690D	BnaA02g18240D		BnaA03g05780D	BnaA02g28330D
BnaA02g22860D	BnaA02g18280D		BnaA03g05800D	BnaA02g28390D
BnaA02g22960D	BnaA02g18350D		BnaA03g05840D	BnaA02g28410D
BnaA02g22990D	BnaA02g18400D		BnaA03g05860D	BnaA02g28530D
BnaA02g23000D	BnaA02g18470D		BnaA03g05970D	BnaA02g28540D
BnaA02g23020D	BnaA02g18480D		BnaA03g06240D	BnaA02g28560D
BnaA02g23050D	BnaA02g18490D		BnaA03g06260D	BnaA02g28570D
BnaA02g23220D	BnaA02g18670D		BnaA03g06330D	BnaA02g28590D
BnaA02g23230D	BnaA02g18700D		BnaA03g06390D	BnaA02g28660D
BnaA02g23330D	BnaA02g18710D		BnaA03g06540D	BnaA02g28670D
BnaA02g23480D	BnaA02g18780D		BnaA03g06710D	BnaA02g28730D
BnaA02g23490D	BnaA02g18830D		BnaA03g06790D	BnaA02g28740D
BnaA02g23540D	BnaA02g18840D		BnaA03g06930D	BnaA02g28800D
BnaA02g23560D	BnaA02g18850D		BnaA03g06990D	BnaA02g28860D
BnaA02g23640D	BnaA02g18860D		BnaA03g07010D	BnaA02g28870D
BnaA02g23650D	BnaA02g18970D		BnaA03g07050D	BnaA02g28890D
BnaA02g23720D	BnaA02g19000D		BnaA03g07060D	BnaA02g29010D
BnaA02g23820D	BnaA02g19010D		BnaA03g07090D	BnaA02g29080D
BnaA02g23870D	BnaA02g19100D		BnaA03g07130D	BnaA02g29220D
BnaA02g23910D	BnaA02g19160D		BnaA03g07140D	BnaA02g29270D
BnaA02g23990D	BnaA02g19190D		BnaA03g07160D	BnaA02g29290D
BnaA02g24030D	BnaA02g19210D		BnaA03g07210D	BnaA02g29460D
BnaA02g24040D	BnaA02g19260D		BnaA03g07240D	BnaA02g29480D
BnaA02g24100D	BnaA02g19300D		BnaA03g07420D	BnaA02g29490D
BnaA02g24140D	BnaA02g19320D		BnaA03g07450D	BnaA02g29530D
BnaA02g24410D	BnaA02g19400D		BnaA03g07640D	BnaA02g29600D
BnaA02g24470D	BnaA02g19500D		BnaA03g07830D	BnaA02g29720D
BnaA02g24480D	BnaA02g19510D		BnaA03g07880D	BnaA02g29800D
BnaA02g24500D	BnaA02g19580D		BnaA03g07960D	BnaA02g29830D
BnaA02g24640D	BnaA02g19620D		BnaA03g08000D	BnaA02g29930D
BnaA02g24660D	BnaA02g19720D		BnaA03g08010D	BnaA02g29940D
BnaA02g24720D	BnaA02g19740D		BnaA03g08070D	BnaA02g29980D
BnaA02g24770D	BnaA02g19760D		BnaA03g08080D	BnaA02g30180D
BnaA02g24780D	BnaA02g19770D		BnaA03g08110D	BnaA02g30190D
BnaA02g24890D	BnaA02g19780D		BnaA03g08150D	BnaA02g30200D
BnaA02g24900D	BnaA02g19800D		BnaA03g08250D	BnaA02g30210D
BnaA02g24910D	BnaA02g19840D		BnaA03g08260D	BnaA02g30220D
BnaA02g24930D	BnaA02g19880D		BnaA03g08370D	BnaA02g30230D
BnaA02g25090D	BnaA02g19950D		BnaA03g08430D	BnaA02g30390D
BnaA02g25110D	BnaA02g20020D		BnaA03g08540D	BnaA02g30490D
BnaA02g25150D	BnaA02g20130D		BnaA03g08590D	BnaA02g30610D
BnaA02g25460D	BnaA02g20140D		BnaA03g08630D	BnaA02g30650D
BnaA02g25530D	BnaA02g20170D		BnaA03g08710D	BnaA02g30690D
BnaA02g25550D	BnaA02g20200D		BnaA03g08740D	BnaA02g30730D
BnaA02g25740D	BnaA02g20230D		BnaA03g08750D	BnaA02g30740D
BnaA02g25840D	BnaA02g20250D		BnaA03g08800D	BnaA02g30760D
BnaA02g25880D	BnaA02g20350D		BnaA03g08920D	BnaA02g30790D
BnaA02g25890D	BnaA02g20430D		BnaA03g08950D	BnaA02g30880D
BnaA02g25930D	BnaA02g20470D		BnaA03g08990D	BnaA02g30990D
BnaA02g26140D	BnaA02g20510D		BnaA03g09160D	BnaA02g31000D
BnaA02g26170D	BnaA02g20530D		BnaA03g09210D	BnaA02g31030D
BnaA02g26230D	BnaA02g20540D		BnaA03g09250D	BnaA02g31060D
BnaA02g26250D	BnaA02g20570D		BnaA03g09280D	BnaA02g31100D
BnaA02g26260D	BnaA02g20630D		BnaA03g09290D	BnaA02g31110D
BnaA02g26350D	BnaA02g20690D		BnaA03g09300D	BnaA02g31200D
BnaA02g26440D	BnaA02g20740D		BnaA03g09350D	BnaA02g31220D
BnaA02g26480D	BnaA02g20750D		BnaA03g09400D	BnaA02g31240D
BnaA02g26490D	BnaA02g20760D		BnaA03g09440D	BnaA02g31270D
BnaA02g26570D	BnaA02g20810D		BnaA03g09480D	BnaA02g31280D
BnaA02g26580D	BnaA02g20860D		BnaA03g09550D	BnaA02g31470D
BnaA02g26590D	BnaA02g20950D		BnaA03g09670D	BnaA02g31530D
BnaA02g26610D	BnaA02g21020D		BnaA03g09700D	BnaA02g31590D
BnaA02g26620D	BnaA02g21070D		BnaA03g09780D	BnaA02g31610D
BnaA02g26650D	BnaA02g21180D		BnaA03g09870D	BnaA02g31670D
BnaA02g26680D	BnaA02g21240D		BnaA03g09980D	BnaA02g31860D
BnaA02g26760D	BnaA02g21300D		BnaA03g10060D	BnaA02g31890D
BnaA02g26780D	BnaA02g21380D		BnaA03g10240D	BnaA02g31900D
BnaA02g26810D	BnaA02g21420D		BnaA03g10290D	BnaA02g31920D
BnaA02g26850D	BnaA02g21470D		BnaA03g10390D	BnaA02g32020D
BnaA02g26890D	BnaA02g21540D		BnaA03g10450D	BnaA02g32040D
BnaA02g26910D	BnaA02g21560D		BnaA03g10480D	BnaA02g32100D
BnaA02g26930D	BnaA02g21640D		BnaA03g10490D	BnaA02g32290D
BnaA02g26960D	BnaA02g21680D		BnaA03g10620D	BnaA02g32300D
BnaA02g26980D	BnaA02g21690D		BnaA03g10640D	BnaA02g32370D
BnaA02g27000D	BnaA02g21930D		BnaA03g10660D	BnaA02g32390D
BnaA02g27010D	BnaA02g22000D		BnaA03g10680D	BnaA02g32440D
BnaA02g27020D	BnaA02g22120D		BnaA03g10690D	BnaA02g32450D
BnaA02g27070D	BnaA02g22140D		BnaA03g10710D	BnaA02g32610D
BnaA02g27180D	BnaA02g22310D		BnaA03g10770D	BnaA02g32630D
BnaA02g27260D	BnaA02g22320D		BnaA03g10790D	BnaA02g32690D
BnaA02g27300D	BnaA02g22360D		BnaA03g10910D	BnaA02g32770D
BnaA02g27380D	BnaA02g22400D		BnaA03g10940D	BnaA02g32860D
BnaA02g27470D	BnaA02g22440D		BnaA03g10950D	BnaA02g32880D
BnaA02g27480D	BnaA02g22450D		BnaA03g11100D	BnaA02g32890D
BnaA02g27540D	BnaA02g22470D		BnaA03g11110D	BnaA02g32900D
BnaA02g27550D	BnaA02g22490D		BnaA03g11150D	BnaA02g32930D
BnaA02g27650D	BnaA02g22550D		BnaA03g11190D	BnaA02g32950D
BnaA02g27750D	BnaA02g22810D		BnaA03g11320D	BnaA02g32960D
BnaA02g27760D	BnaA02g22910D		BnaA03g11360D	BnaA02g33180D
BnaA02g27830D	BnaA02g23010D		BnaA03g11410D	BnaA02g33190D
BnaA02g27870D	BnaA02g23060D		BnaA03g11590D	BnaA02g33250D
BnaA02g27970D	BnaA02g23290D		BnaA03g11600D	BnaA02g33370D
BnaA02g27990D	BnaA02g23310D		BnaA03g11610D	BnaA02g33480D
BnaA02g28020D	BnaA02g23440D		BnaA03g11650D	BnaA02g33520D
BnaA02g28030D	BnaA02g23460D		BnaA03g11680D	BnaA02g33540D
BnaA02g28050D	BnaA02g23500D		BnaA03g11690D	BnaA02g33600D
BnaA02g28060D	BnaA02g23530D		BnaA03g11760D	BnaA02g33610D
BnaA02g28080D	BnaA02g23580D		BnaA03g11780D	BnaA02g33770D
BnaA02g28160D	BnaA02g23600D		BnaA03g11800D	BnaA02g33780D
BnaA02g28260D	BnaA02g23620D		BnaA03g11820D	BnaA02g33900D
BnaA02g28270D	BnaA02g23660D		BnaA03g11850D	BnaA02g33920D
BnaA02g28300D	BnaA02g23670D		BnaA03g11860D	BnaA02g33940D
BnaA02g28340D	BnaA02g23800D		BnaA03g11910D	BnaA02g33960D
BnaA02g28400D	BnaA02g23880D		BnaA03g11920D	BnaA02g34030D
BnaA02g28570D	BnaA02g23900D		BnaA03g11930D	BnaA02g34130D
BnaA02g28770D	BnaA02g24000D		BnaA03g11970D	BnaA02g34380D
BnaA02g28880D	BnaA02g24010D		BnaA03g11990D	BnaA02g34420D
BnaA02g28930D	BnaA02g24020D		BnaA03g12010D	BnaA02g34470D
BnaA02g28950D	BnaA02g24110D		BnaA03g12120D	BnaA02g34520D
BnaA02g28960D	BnaA02g24130D		BnaA03g12150D	BnaA02g34540D
BnaA02g29030D	BnaA02g24150D		BnaA03g12250D	BnaA02g34550D
BnaA02g29040D	BnaA02g24170D		BnaA03g12490D	BnaA02g34690D
BnaA02g29050D	BnaA02g24180D		BnaA03g12520D	BnaA02g34700D
BnaA02g29140D	BnaA02g24310D		BnaA03g12560D	BnaA02g34710D
BnaA02g29210D	BnaA02g24350D		BnaA03g12610D	BnaA02g34720D
BnaA02g29220D	BnaA02g24390D		BnaA03g12710D	BnaA02g34760D
BnaA02g29300D	BnaA02g24440D		BnaA03g12810D	BnaA02g34830D
BnaA02g29320D	BnaA02g24510D		BnaA03g12860D	BnaA02g34860D
BnaA02g29340D	BnaA02g24730D		BnaA03g12970D	BnaA02g34880D
BnaA02g29360D	BnaA02g24990D		BnaA03g13060D	BnaA02g34940D
BnaA02g29610D	BnaA02g25010D		BnaA03g13080D	BnaA02g35040D
BnaA02g29660D	BnaA02g25020D		BnaA03g13170D	BnaA02g35130D
BnaA02g29730D	BnaA02g25040D		BnaA03g13210D	BnaA02g35150D
BnaA02g29770D	BnaA02g25050D		BnaA03g13250D	BnaA02g35170D
BnaA02g29910D	BnaA02g25070D		BnaA03g13330D	BnaA02g35270D
BnaA02g29950D	BnaA02g25210D		BnaA03g13490D	BnaA02g35340D
BnaA02g30100D	BnaA02g25390D		BnaA03g13590D	BnaA02g35420D
BnaA02g30130D	BnaA02g25400D		BnaA03g13600D	BnaA02g35480D
BnaA02g30300D	BnaA02g25440D		BnaA03g13730D	BnaA02g35510D
BnaA02g30310D	BnaA02g25590D		BnaA03g13740D	BnaA02g35550D
BnaA02g30370D	BnaA02g25600D		BnaA03g13830D	BnaA02g35640D
BnaA02g30400D	BnaA02g25610D		BnaA03g13840D	BnaA02g35660D
BnaA02g30450D	BnaA02g25640D		BnaA03g14000D	BnaA02g35670D
BnaA02g30460D	BnaA02g25680D		BnaA03g14010D	BnaA02g35680D
BnaA02g30590D	BnaA02g25730D		BnaA03g14050D	BnaA02g35690D
BnaA02g30600D	BnaA02g25750D		BnaA03g14140D	BnaA02g35780D
BnaA02g30620D	BnaA02g25790D		BnaA03g14150D	BnaA02g35790D
BnaA02g30980D	BnaA02g25820D		BnaA03g14210D	BnaA02g35830D
BnaA02g31130D	BnaA02g25830D		BnaA03g14260D	BnaA02g35840D
BnaA02g31140D	BnaA02g25860D		BnaA03g14300D	BnaA02g35860D
BnaA02g31150D	BnaA02g25910D		BnaA03g14370D	BnaA02g35950D
BnaA02g31160D	BnaA02g25940D		BnaA03g14380D	BnaA02g36000D
BnaA02g31180D	BnaA02g25970D		BnaA03g14420D	BnaA02g36150D
BnaA02g31210D	BnaA02g26000D		BnaA03g14430D	BnaA02g36210D
BnaA02g31250D	BnaA02g26020D		BnaA03g14450D	BnaA02g36230D
BnaA02g31260D	BnaA02g26180D		BnaA03g14520D	BnaA02g36380D
BnaA02g31290D	BnaA02g26210D		BnaA03g14660D	BnaA02g36490D
BnaA02g31300D	BnaA02g26270D		BnaA03g14780D	BnaA02g36560D
BnaA02g31310D	BnaA02g26290D		BnaA03g14790D	BnaA02g36630D
BnaA02g31320D	BnaA02g26380D		BnaA03g14800D	BnaA02g36660D
BnaA02g31370D	BnaA02g26420D		BnaA03g14810D	BnaA02g36740D
BnaA02g31390D	BnaA02g26450D		BnaA03g14830D	BnaA02g36790D
BnaA02g31430D	BnaA02g26630D		BnaA03g14850D	BnaA02g36840D
BnaA02g31450D	BnaA02g26670D		BnaA03g14910D	BnaA02g36860D
BnaA02g31550D	BnaA02g26950D		BnaA03g15140D	BnaA02g36910D
BnaA02g31630D	BnaA02g26990D		BnaA03g15190D	BnaA02g36920D
BnaA02g31720D	BnaA02g27130D		BnaA03g15200D	BnaA02g36990D
BnaA02g31750D	BnaA02g27160D		BnaA03g15210D	BnaA02g37020D
BnaA02g31820D	BnaA02g27190D		BnaA03g15270D	BnaA02g37170D
BnaA02g31870D	BnaA02g27200D		BnaA03g15280D	BnaA03g00010D
BnaA02g31950D	BnaA02g27230D		BnaA03g15290D	BnaA03g00100D
BnaA02g32070D	BnaA02g27270D		BnaA03g15330D	BnaA03g00140D
BnaA02g32080D	BnaA02g27490D		BnaA03g15380D	BnaA03g00160D
BnaA02g32090D	BnaA02g27600D		BnaA03g15470D	BnaA03g00220D
BnaA02g32150D	BnaA02g27620D		BnaA03g15570D	BnaA03g00290D
BnaA02g32160D	BnaA02g27740D		BnaA03g15580D	BnaA03g00400D
BnaA02g32320D	BnaA02g27770D		BnaA03g15600D	BnaA03g00450D
BnaA02g32360D	BnaA02g27850D		BnaA03g15760D	BnaA03g00460D
BnaA02g32450D	BnaA02g27980D		BnaA03g15800D	BnaA03g00480D
BnaA02g32460D	BnaA02g28040D		BnaA03g15810D	BnaA03g00490D
BnaA02g32650D	BnaA02g28090D		BnaA03g15870D	BnaA03g00520D
BnaA02g32720D	BnaA02g28130D		BnaA03g15900D	BnaA03g00640D
BnaA02g32780D	BnaA02g28150D		BnaA03g15910D	BnaA03g00660D
BnaA02g32800D	BnaA02g28170D		BnaA03g15920D	BnaA03g00700D
BnaA02g32870D	BnaA02g28180D		BnaA03g16000D	BnaA03g00710D
BnaA02g32990D	BnaA02g28290D		BnaA03g16020D	BnaA03g00740D
BnaA02g33060D	BnaA02g28370D		BnaA03g16040D	BnaA03g00750D
BnaA02g33200D	BnaA02g28410D		BnaA03g16050D	BnaA03g00760D
BnaA02g33270D	BnaA02g28420D		BnaA03g16070D	BnaA03g00770D
BnaA02g33290D	BnaA02g28530D		BnaA03g16080D	BnaA03g00780D
BnaA02g33320D	BnaA02g28590D		BnaA03g16240D	BnaA03g00800D
BnaA02g33500D	BnaA02g28660D		BnaA03g16290D	BnaA03g00860D
BnaA02g33530D	BnaA02g28670D		BnaA03g16400D	BnaA03g00870D
BnaA02g33620D	BnaA02g28680D		BnaA03g16430D	BnaA03g00930D
BnaA02g33630D	BnaA02g28700D		BnaA03g16500D	BnaA03g01010D
BnaA02g33650D	BnaA02g28740D		BnaA03g16530D	BnaA03g01040D
BnaA02g33710D	BnaA02g28800D		BnaA03g16580D	BnaA03g01180D
BnaA02g33830D	BnaA02g28860D		BnaA03g16640D	BnaA03g01290D
BnaA02g33840D	BnaA02g28870D		BnaA03g16660D	BnaA03g01300D
BnaA02g33880D	BnaA02g28890D		BnaA03g16670D	BnaA03g01330D
BnaA02g33910D	BnaA02g29010D		BnaA03g16720D	BnaA03g01500D
BnaA02g33980D	BnaA02g29070D		BnaA03g16750D	BnaA03g01520D
BnaA02g34000D	BnaA02g29080D		BnaA03g16760D	BnaA03g01740D
BnaA02g34070D	BnaA02g29370D		BnaA03g16830D	BnaA03g01900D
BnaA02g34080D	BnaA02g29490D		BnaA03g16860D	BnaA03g01970D
BnaA02g34090D	BnaA02g29530D		BnaA03g16960D	BnaA03g02320D
BnaA02g34110D	BnaA02g29580D		BnaA03g16990D	BnaA03g02350D
BnaA02g34120D	BnaA02g29600D		BnaA03g17000D	BnaA03g02410D
BnaA02g34140D	BnaA02g29640D		BnaA03g17030D	BnaA03g02420D
BnaA02g34150D	BnaA02g29720D		BnaA03g17090D	BnaA03g02470D
BnaA02g34180D	BnaA02g29800D		BnaA03g17100D	BnaA03g02600D
BnaA02g34210D	BnaA02g29820D		BnaA03g17110D	BnaA03g02610D
BnaA02g34230D	BnaA02g29830D		BnaA03g17150D	BnaA03g02660D
BnaA02g34320D	BnaA02g29930D		BnaA03g17210D	BnaA03g02800D
BnaA02g34330D	BnaA02g30040D		BnaA03g17270D	BnaA03g02820D
BnaA02g34370D	BnaA02g30180D		BnaA03g17310D	BnaA03g02880D
BnaA02g34440D	BnaA02g30190D		BnaA03g17400D	BnaA03g02900D
BnaA02g34470D	BnaA02g30200D		BnaA03g17460D	BnaA03g02930D
BnaA02g34480D	BnaA02g30230D		BnaA03g17500D	BnaA03g02990D
BnaA02g34580D	BnaA02g30270D		BnaA03g17530D	BnaA03g03200D
BnaA02g34750D	BnaA02g30290D		BnaA03g17540D	BnaA03g03210D
BnaA02g34830D	BnaA02g30380D		BnaA03g17640D	BnaA03g03270D
BnaA02g34870D	BnaA02g30430D		BnaA03g17750D	BnaA03g03350D
BnaA02g34960D	BnaA02g30470D		BnaA03g17820D	BnaA03g03360D
BnaA02g34970D	BnaA02g30520D		BnaA03g17890D	BnaA03g03630D
BnaA02g34980D	BnaA02g30530D		BnaA03g17960D	BnaA03g03700D
BnaA02g34990D	BnaA02g30630D		BnaA03g18010D	BnaA03g03760D
BnaA02g35000D	BnaA02g30650D		BnaA03g18070D	BnaA03g03830D
BnaA02g35010D	BnaA02g30680D		BnaA03g18210D	BnaA03g03940D
BnaA02g35020D	BnaA02g30690D		BnaA03g18230D	BnaA03g04000D
BnaA02g35030D	BnaA02g30730D		BnaA03g18340D	BnaA03g04060D
BnaA02g35100D	BnaA02g30740D		BnaA03g18420D	BnaA03g04090D
BnaA02g35120D	BnaA02g30760D		BnaA03g18480D	BnaA03g04100D
BnaA02g35160D	BnaA02g30820D		BnaA03g18540D	BnaA03g04140D
BnaA02g35250D	BnaA02g30850D		BnaA03g18600D	BnaA03g04170D
BnaA02g35390D	BnaA02g30880D		BnaA03g18620D	BnaA03g04200D
BnaA02g35440D	BnaA02g30900D		BnaA03g18630D	BnaA03g04270D
BnaA02g35620D	BnaA02g31000D		BnaA03g18640D	BnaA03g04440D
BnaA02g35660D	BnaA02g31030D		BnaA03g18650D	BnaA03g04530D
BnaA02g35700D	BnaA02g31060D		BnaA03g18670D	BnaA03g04560D
BnaA02g35710D	BnaA02g31110D		BnaA03g18680D	BnaA03g04580D
BnaA02g35740D	BnaA02g31170D		BnaA03g18700D	BnaA03g04590D
BnaA02g35750D	BnaA02g31220D		BnaA03g18820D	BnaA03g04600D
BnaA02g35760D	BnaA02g31230D		BnaA03g18900D	BnaA03g04610D
BnaA02g35770D	BnaA02g31240D		BnaA03g18970D	BnaA03g04620D
BnaA02g35820D	BnaA02g31270D		BnaA03g19010D	BnaA03g04690D
BnaA02g35860D	BnaA02g31280D		BnaA03g19180D	BnaA03g04710D
BnaA02g35880D	BnaA02g31470D		BnaA03g19190D	BnaA03g04720D
BnaA02g35930D	BnaA02g31590D		BnaA03g19270D	BnaA03g04740D
BnaA02g35970D	BnaA02g31600D		BnaA03g19280D	BnaA03g04770D
BnaA02g35980D	BnaA02g31620D		BnaA03g19330D	BnaA03g04790D
BnaA02g36080D	BnaA02g31670D		BnaA03g19340D	BnaA03g04820D
BnaA02g36250D	BnaA02g31700D		BnaA03g19570D	BnaA03g04850D
BnaA02g36270D	BnaA02g31880D		BnaA03g19850D	BnaA03g04870D
BnaA02g36510D	BnaA02g31890D		BnaA03g19860D	BnaA03g04880D
BnaA02g36520D	BnaA02g31900D		BnaA03g19950D	BnaA03g04890D
BnaA02g36710D	BnaA02g31910D		BnaA03g19960D	BnaA03g04910D
BnaA02g36750D	BnaA02g31920D		BnaA03g20050D	BnaA03g05000D
BnaA02g36800D	BnaA02g31940D		BnaA03g20240D	BnaA03g05010D
BnaA02g36820D	BnaA02g31980D		BnaA03g20290D	BnaA03g05080D
BnaA02g36830D	BnaA02g32020D		BnaA03g20300D	BnaA03g05100D
BnaA02g36850D	BnaA02g32040D		BnaA03g20310D	BnaA03g05110D
BnaA02g36950D	BnaA02g32100D		BnaA03g20340D	BnaA03g05220D
BnaA02g36980D	BnaA02g32110D		BnaA03g20360D	BnaA03g05280D
BnaA02g37010D	BnaA02g32170D		BnaA03g20510D	BnaA03g05320D
BnaA02g37100D	BnaA02g32180D		BnaA03g20650D	BnaA03g05370D
BnaA02g37110D	BnaA02g32190D		BnaA03g20690D	BnaA03g05380D
BnaA02g37160D	BnaA02g32260D		BnaA03g20730D	BnaA03g05390D
BnaA03g00110D	BnaA02g32290D		BnaA03g20770D	BnaA03g05460D
BnaA03g00160D	BnaA02g32330D		BnaA03g20910D	BnaA03g05500D
BnaA03g00200D	BnaA02g32350D		BnaA03g20930D	BnaA03g05520D
BnaA03g00230D	BnaA02g32370D		BnaA03g21030D	BnaA03g05530D
BnaA03g00250D	BnaA02g32420D		BnaA03g21040D	BnaA03g05550D
BnaA03g00260D	BnaA02g32550D		BnaA03g21060D	BnaA03g05560D
BnaA03g00300D	BnaA02g32560D		BnaA03g21190D	BnaA03g05650D
BnaA03g00350D	BnaA02g32830D		BnaA03g21220D	BnaA03g05700D
BnaA03g00360D	BnaA02g32840D		BnaA03g21260D	BnaA03g05770D
BnaA03g00390D	BnaA02g32860D		BnaA03g21270D	BnaA03g05790D
BnaA03g00410D	BnaA02g32880D		BnaA03g21390D	BnaA03g05810D
BnaA03g00420D	BnaA02g32890D		BnaA03g21490D	BnaA03g05850D
BnaA03g00440D	BnaA02g32960D		BnaA03g21590D	BnaA03g05870D
BnaA03g00530D	BnaA02g33040D		BnaA03g21620D	BnaA03g05980D
BnaA03g00560D	BnaA02g33180D		BnaA03g21640D	BnaA03g06000D
BnaA03g00570D	BnaA02g33190D		BnaA03g21670D	BnaA03g06030D
BnaA03g00670D	BnaA02g33250D		BnaA03g21790D	BnaA03g06110D
BnaA03g00700D	BnaA02g33310D		BnaA03g21800D	BnaA03g06490D
BnaA03g00720D	BnaA02g33340D		BnaA03g21810D	BnaA03g06640D
BnaA03g00730D	BnaA02g33370D		BnaA03g21900D	BnaA03g06670D
BnaA03g00820D	BnaA02g33380D		BnaA03g21920D	BnaA03g06750D
BnaA03g00840D	BnaA02g33480D		BnaA03g21970D	BnaA03g06760D
BnaA03g00880D	BnaA02g33520D		BnaA03g22090D	BnaA03g06810D
BnaA03g00910D	BnaA02g33600D		BnaA03g22120D	BnaA03g06820D
BnaA03g00990D	BnaA02g33610D		BnaA03g22280D	BnaA03g06830D
BnaA03g01100D	BnaA02g33680D		BnaA03g22290D	BnaA03g06840D
BnaA03g01140D	BnaA02g33770D		BnaA03g22330D	BnaA03g06850D
BnaA03g01200D	BnaA02g33860D		BnaA03g22360D	BnaA03g06870D
BnaA03g01210D	BnaA02g33900D		BnaA03g22390D	BnaA03g06880D
BnaA03g01250D	BnaA02g33940D		BnaA03g22400D	BnaA03g06970D
BnaA03g01310D	BnaA02g33960D		BnaA03g22470D	BnaA03g07170D
BnaA03g01330D	BnaA02g34030D		BnaA03g22490D	BnaA03g07200D
BnaA03g01420D	BnaA02g34050D		BnaA03g22500D	BnaA03g07230D
BnaA03g01450D	BnaA02g34130D		BnaA03g22520D	BnaA03g07250D
BnaA03g01460D	BnaA02g34250D		BnaA03g22540D	BnaA03g07300D
BnaA03g01480D	BnaA02g34380D		BnaA03g22580D	BnaA03g07400D
BnaA03g01490D	BnaA02g34400D		BnaA03g22690D	BnaA03g07430D
BnaA03g01540D	BnaA02g34420D		BnaA03g22720D	BnaA03g07440D
BnaA03g01590D	BnaA02g34430D		BnaA03g22740D	BnaA03g07460D
BnaA03g01650D	BnaA02g34510D		BnaA03g22770D	BnaA03g07500D
BnaA03g01670D	BnaA02g34540D		BnaA03g22790D	BnaA03g07510D
BnaA03g01690D	BnaA02g34690D		BnaA03g22820D	BnaA03g07520D
BnaA03g01760D	BnaA02g34700D		BnaA03g22890D	BnaA03g07530D
BnaA03g01790D	BnaA02g34710D		BnaA03g22980D	BnaA03g07670D
BnaA03g01870D	BnaA02g34760D		BnaA03g23000D	BnaA03g07720D
BnaA03g01910D	BnaA02g34810D		BnaA03g23010D	BnaA03g07860D
BnaA03g01920D	BnaA02g34850D		BnaA03g23160D	BnaA03g07910D
BnaA03g02010D	BnaA02g34860D		BnaA03g23290D	BnaA03g07920D
BnaA03g02030D	BnaA02g34880D		BnaA03g23300D	BnaA03g07930D
BnaA03g02040D	BnaA02g34890D		BnaA03g23320D	BnaA03g08030D
BnaA03g02060D	BnaA02g34940D		BnaA03g23400D	BnaA03g08050D
BnaA03g02150D	BnaA02g34950D		BnaA03g23460D	BnaA03g08120D
BnaA03g02160D	BnaA02g35040D		BnaA03g23520D	BnaA03g08160D
BnaA03g02200D	BnaA02g35130D		BnaA03g23530D	BnaA03g08170D
BnaA03g02250D	BnaA02g35140D		BnaA03g23550D	BnaA03g08270D
BnaA03g02260D	BnaA02g35150D		BnaA03g23590D	BnaA03g08340D
BnaA03g02310D	BnaA02g35170D		BnaA03g23800D	BnaA03g08350D
BnaA03g02380D	BnaA02g35270D		BnaA03g23820D	BnaA03g08360D
BnaA03g02390D	BnaA02g35370D		BnaA03g23930D	BnaA03g08470D
BnaA03g02400D	BnaA02g35410D		BnaA03g24050D	BnaA03g08490D
BnaA03g02450D	BnaA02g35420D		BnaA03g24060D	BnaA03g08640D
BnaA03g02460D	BnaA02g35480D		BnaA03g24140D	BnaA03g08660D
BnaA03g02500D	BnaA02g35550D		BnaA03g24220D	BnaA03g08670D
BnaA03g02550D	BnaA02g35580D		BnaA03g24240D	BnaA03g08720D
BnaA03g02620D	BnaA02g35650D		BnaA03g24250D	BnaA03g08730D
BnaA03g02630D	BnaA02g35670D		BnaA03g24340D	BnaA03g08760D
BnaA03g02640D	BnaA02g35680D		BnaA03g24390D	BnaA03g08810D
BnaA03g02730D	BnaA02g35730D		BnaA03g24410D	BnaA03g08860D
BnaA03g02760D	BnaA02g35780D		BnaA03g24420D	BnaA03g08880D
BnaA03g02840D	BnaA02g35840D		BnaA03g24730D	BnaA03g08910D
BnaA03g02850D	BnaA02g35950D		BnaA03g24750D	BnaA03g09060D
BnaA03g02870D	BnaA02g36000D		BnaA03g24810D	BnaA03g09070D
BnaA03g02960D	BnaA02g36020D		BnaA03g24870D	BnaA03g09150D
BnaA03g03100D	BnaA02g36030D		BnaA03g24880D	BnaA03g09200D
BnaA03g03140D	BnaA02g36050D		BnaA03g24890D	BnaA03g09390D
BnaA03g03150D	BnaA02g36150D		BnaA03g25130D	BnaA03g09490D
BnaA03g03240D	BnaA02g36200D		BnaA03g25240D	BnaA03g09500D
BnaA03g03380D	BnaA02g36210D		BnaA03g25330D	BnaA03g09520D
BnaA03g03400D	BnaA02g36290D		BnaA03g25440D	BnaA03g09530D
BnaA03g03440D	BnaA02g36380D		BnaA03g25450D	BnaA03g09680D
BnaA03g03530D	BnaA02g36450D		BnaA03g25460D	BnaA03g09740D
BnaA03g03540D	BnaA02g36470D		BnaA03g25510D	BnaA03g09800D
BnaA03g03600D	BnaA02g36490D		BnaA03g25550D	BnaA03g09820D
BnaA03g03620D	BnaA02g36500D		BnaA03g25580D	BnaA03g09850D
BnaA03g03720D	BnaA02g36540D		BnaA03g25600D	BnaA03g09900D
BnaA03g03740D	BnaA02g36580D		BnaA03g25610D	BnaA03g09910D
BnaA03g03790D	BnaA02g36590D		BnaA03g25630D	BnaA03g09920D
BnaA03g03820D	BnaA02g36630D		BnaA03g25660D	BnaA03g10000D
BnaA03g03830D	BnaA02g36690D		BnaA03g25890D	BnaA03g10070D
BnaA03g03840D	BnaA02g36790D		BnaA03g25920D	BnaA03g10100D
BnaA03g03850D	BnaA02g36860D		BnaA03g26000D	BnaA03g10110D
BnaA03g03950D	BnaA02g36910D		BnaA03g26120D	BnaA03g10120D
BnaA03g03960D	BnaA02g36920D		BnaA03g26130D	BnaA03g10140D
BnaA03g04110D	BnaA02g36970D		BnaA03g26190D	BnaA03g10160D
BnaA03g04160D	BnaA02g37020D		BnaA03g26210D	BnaA03g10250D
BnaA03g04180D	BnaA02g37060D		BnaA03g26220D	BnaA03g10270D
BnaA03g04190D	BnaA02g37120D		BnaA03g26420D	BnaA03g10320D
BnaA03g04250D	BnaA03g00050D		BnaA03g26490D	BnaA03g10430D
BnaA03g04280D	BnaA03g00100D		BnaA03g26510D	BnaA03g10440D
BnaA03g04290D	BnaA03g00220D		BnaA03g26530D	BnaA03g10470D
BnaA03g04300D	BnaA03g00240D		BnaA03g26700D	BnaA03g10520D
BnaA03g04310D	BnaA03g00320D		BnaA03g26840D	BnaA03g10550D
BnaA03g04320D	BnaA03g00330D		BnaA03g26940D	BnaA03g10560D
BnaA03g04340D	BnaA03g00380D		BnaA03g26950D	BnaA03g10570D
BnaA03g04360D	BnaA03g00450D		BnaA03g26960D	BnaA03g10580D
BnaA03g04370D	BnaA03g00460D		BnaA03g27030D	BnaA03g10700D
BnaA03g04380D	BnaA03g00470D		BnaA03g27070D	BnaA03g10740D
BnaA03g04390D	BnaA03g00480D		BnaA03g27090D	BnaA03g10840D
BnaA03g04410D	BnaA03g00520D		BnaA03g27100D	BnaA03g10890D
BnaA03g04460D	BnaA03g00550D		BnaA03g27280D	BnaA03g10960D
BnaA03g04480D	BnaA03g00600D		BnaA03g27290D	BnaA03g10990D
BnaA03g04510D	BnaA03g00640D		BnaA03g27330D	BnaA03g11120D
BnaA03g04520D	BnaA03g00650D		BnaA03g27400D	BnaA03g11220D
BnaA03g04670D	BnaA03g00660D		BnaA03g27530D	BnaA03g11250D
BnaA03g04680D	BnaA03g00710D		BnaA03g27710D	BnaA03g11290D
BnaA03g04730D	BnaA03g00740D		BnaA03g27740D	BnaA03g11310D
BnaA03g04780D	BnaA03g00760D		BnaA03g27800D	BnaA03g11380D
BnaA03g04810D	BnaA03g00780D		BnaA03g27920D	BnaA03g11490D
BnaA03g04920D	BnaA03g00790D		BnaA03g27950D	BnaA03g11500D
BnaA03g04940D	BnaA03g00800D		BnaA03g28000D	BnaA03g11520D
BnaA03g04950D	BnaA03g00900D		BnaA03g28060D	BnaA03g11660D
BnaA03g05160D	BnaA03g00920D		BnaA03g28090D	BnaA03g11710D
BnaA03g05170D	BnaA03g00930D		BnaA03g28120D	BnaA03g11750D
BnaA03g05180D	BnaA03g01040D		BnaA03g28150D	BnaA03g12000D
BnaA03g05190D	BnaA03g01120D		BnaA03g28160D	BnaA03g12040D
BnaA03g05230D	BnaA03g01180D		BnaA03g28230D	BnaA03g12050D
BnaA03g05300D	BnaA03g01270D		BnaA03g28400D	BnaA03g12280D
BnaA03g05310D	BnaA03g01290D		BnaA03g28440D	BnaA03g12310D
BnaA03g05330D	BnaA03g01300D		BnaA03g28630D	BnaA03g12370D
BnaA03g05340D	BnaA03g01400D		BnaA03g28660D	BnaA03g12390D
BnaA03g05420D	BnaA03g01410D		BnaA03g28740D	BnaA03g12410D
BnaA03g05430D	BnaA03g01470D		BnaA03g28760D	BnaA03g12450D
BnaA03g05450D	BnaA03g01520D		BnaA03g28770D	BnaA03g12600D
BnaA03g05570D	BnaA03g01570D		BnaA03g28780D	BnaA03g12680D
BnaA03g05580D	BnaA03g01740D		BnaA03g28810D	BnaA03g12730D
BnaA03g05590D	BnaA03g01900D		BnaA03g28820D	BnaA03g12740D
BnaA03g05610D	BnaA03g01970D		BnaA03g28910D	BnaA03g12780D
BnaA03g05640D	BnaA03g02050D		BnaA03g29070D	BnaA03g12790D
BnaA03g05660D	BnaA03g02220D		BnaA03g29080D	BnaA03g12800D
BnaA03g05750D	BnaA03g02270D		BnaA03g29090D	BnaA03g12900D
BnaA03g05830D	BnaA03g02280D		BnaA03g29120D	BnaA03g12980D
BnaA03g05840D	BnaA03g02290D		BnaA03g29180D	BnaA03g13090D
BnaA03g05860D	BnaA03g02320D		BnaA03g29210D	BnaA03g13100D
BnaA03g05910D	BnaA03g02340D		BnaA03g29270D	BnaA03g13110D
BnaA03g06170D	BnaA03g02350D		BnaA03g29310D	BnaA03g13140D
BnaA03g06200D	BnaA03g02420D		BnaA03g29320D	BnaA03g13240D
BnaA03g06240D	BnaA03g02470D		BnaA03g29370D	BnaA03g13270D
BnaA03g06260D	BnaA03g02480D		BnaA03g29380D	BnaA03g13290D
BnaA03g06290D	BnaA03g02510D		BnaA03g29430D	BnaA03g13370D
BnaA03g06320D	BnaA03g02560D		BnaA03g29440D	BnaA03g13400D
BnaA03g06330D	BnaA03g02570D		BnaA03g29470D	BnaA03g13480D
BnaA03g06390D	BnaA03g02600D		BnaA03g29480D	BnaA03g13550D
BnaA03g06410D	BnaA03g02610D		BnaA03g29510D	BnaA03g13580D
BnaA03g06440D	BnaA03g02650D		BnaA03g29520D	BnaA03g13630D
BnaA03g06460D	BnaA03g02660D		BnaA03g29570D	BnaA03g13660D
BnaA03g06520D	BnaA03g02880D		BnaA03g29580D	BnaA03g13810D
BnaA03g06540D	BnaA03g02900D		BnaA03g29670D	BnaA03g13930D
BnaA03g06680D	BnaA03g02940D		BnaA03g29710D	BnaA03g13980D
BnaA03g06710D	BnaA03g02950D		BnaA03g29810D	BnaA03g14020D
BnaA03g06790D	BnaA03g03040D		BnaA03g29910D	BnaA03g14030D
BnaA03g06900D	BnaA03g03050D		BnaA03g30090D	BnaA03g14070D
BnaA03g06920D	BnaA03g03190D		BnaA03g30140D	BnaA03g14090D
BnaA03g06930D	BnaA03g03200D		BnaA03g30250D	BnaA03g14110D
BnaA03g06990D	BnaA03g03360D		BnaA03g30340D	BnaA03g14120D
BnaA03g07000D	BnaA03g03460D		BnaA03g30460D	BnaA03g14200D
BnaA03g07010D	BnaA03g03490D		BnaA03g30490D	BnaA03g14220D
BnaA03g07020D	BnaA03g03510D		BnaA03g30510D	BnaA03g14230D
BnaA03g07050D	BnaA03g03570D		BnaA03g30520D	BnaA03g14310D
BnaA03g07060D	BnaA03g03580D		BnaA03g30570D	BnaA03g14500D
BnaA03g07090D	BnaA03g03630D		BnaA03g30580D	BnaA03g14510D
BnaA03g07130D	BnaA03g03640D		BnaA03g30660D	BnaA03g14700D
BnaA03g07140D	BnaA03g03680D		BnaA03g30850D	BnaA03g14770D
BnaA03g07160D	BnaA03g03700D		BnaA03g30870D	BnaA03g14880D
BnaA03g07210D	BnaA03g03730D		BnaA03g30920D	BnaA03g14980D
BnaA03g07240D	BnaA03g03750D		BnaA03g31030D	BnaA03g15020D
BnaA03g07420D	BnaA03g03760D		BnaA03g31400D	BnaA03g15090D
BnaA03g07440D	BnaA03g03810D		BnaA03g31470D	BnaA03g15100D
BnaA03g07450D	BnaA03g03900D		BnaA03g31500D	BnaA03g15180D
BnaA03g07490D	BnaA03g03970D		BnaA03g31550D	BnaA03g15220D
BnaA03g07660D	BnaA03g04090D		BnaA03g31580D	BnaA03g15350D
BnaA03g07690D	BnaA03g04140D		BnaA03g31630D	BnaA03g15360D
BnaA03g07740D	BnaA03g04170D		BnaA03g31650D	BnaA03g15370D
BnaA03g07750D	BnaA03g04200D		BnaA03g31660D	BnaA03g15490D
BnaA03g07830D	BnaA03g04220D		BnaA03g31730D	BnaA03g15610D
BnaA03g07840D	BnaA03g04270D		BnaA03g31830D	BnaA03g15630D
BnaA03g08000D	BnaA03g04420D		BnaA03g31840D	BnaA03g15740D
BnaA03g08070D	BnaA03g04440D		BnaA03g31900D	BnaA03g15830D
BnaA03g08080D	BnaA03g04500D		BnaA03g31910D	BnaA03g15930D
BnaA03g08110D	BnaA03g04560D		BnaA03g31930D	BnaA03g16090D
BnaA03g08130D	BnaA03g04580D		BnaA03g31960D	BnaA03g16100D
BnaA03g08150D	BnaA03g04610D		BnaA03g31980D	BnaA03g16110D
BnaA03g08180D	BnaA03g04620D		BnaA03g32280D	BnaA03g16130D
BnaA03g08200D	BnaA03g04690D		BnaA03g32290D	BnaA03g16160D
BnaA03g08210D	BnaA03g04740D		BnaA03g32320D	BnaA03g16200D
BnaA03g08220D	BnaA03g04770D		BnaA03g32340D	BnaA03g16230D
BnaA03g08250D	BnaA03g04790D		BnaA03g32380D	BnaA03g16250D
BnaA03g08260D	BnaA03g04820D		BnaA03g32420D	BnaA03g16270D
BnaA03g08280D	BnaA03g04850D		BnaA03g32490D	BnaA03g16310D
BnaA03g08310D	BnaA03g04890D		BnaA03g32520D	BnaA03g16340D
BnaA03g08370D	BnaA03g04900D		BnaA03g32640D	BnaA03g16370D
BnaA03g08430D	BnaA03g04930D		BnaA03g32650D	BnaA03g16520D
BnaA03g08510D	BnaA03g04970D		BnaA03g32660D	BnaA03g16550D
BnaA03g08540D	BnaA03g05000D		BnaA03g32680D	BnaA03g16590D
BnaA03g08570D	BnaA03g05010D		BnaA03g32690D	BnaA03g16600D
BnaA03g08590D	BnaA03g05110D		BnaA03g32710D	BnaA03g16650D
BnaA03g08700D	BnaA03g05220D		BnaA03g32760D	BnaA03g16700D
BnaA03g08710D	BnaA03g05280D		BnaA03g32770D	BnaA03g16740D
BnaA03g08740D	BnaA03g05320D		BnaA03g32820D	BnaA03g16770D
BnaA03g08800D	BnaA03g05380D		BnaA03g32830D	BnaA03g16780D
BnaA03g08850D	BnaA03g05390D		BnaA03g32890D	BnaA03g16790D
BnaA03g08920D	BnaA03g05500D		BnaA03g32930D	BnaA03g16880D
BnaA03g08950D	BnaA03g05550D		BnaA03g32960D	BnaA03g16930D
BnaA03g08980D	BnaA03g05620D		BnaA03g33090D	BnaA03g16950D
BnaA03g08990D	BnaA03g05700D		BnaA03g33120D	BnaA03g17020D
BnaA03g09040D	BnaA03g05790D		BnaA03g33160D	BnaA03g17050D
BnaA03g09080D	BnaA03g05810D		BnaA03g33180D	BnaA03g17060D
BnaA03g09210D	BnaA03g05850D		BnaA03g33420D	BnaA03g17260D
BnaA03g09220D	BnaA03g05870D		BnaA03g33470D	BnaA03g17290D
BnaA03g09250D	BnaA03g05930D		BnaA03g33610D	BnaA03g17330D
BnaA03g09280D	BnaA03g05950D		BnaA03g33660D	BnaA03g17340D
BnaA03g09290D	BnaA03g05980D		BnaA03g33670D	BnaA03g17410D
BnaA03g09300D	BnaA03g06000D		BnaA03g33700D	BnaA03g17450D
BnaA03g09350D	BnaA03g06030D		BnaA03g33790D	BnaA03g17490D
BnaA03g09400D	BnaA03g06110D		BnaA03g33820D	BnaA03g17510D
BnaA03g09430D	BnaA03g06160D		BnaA03g33990D	BnaA03g17560D
BnaA03g09440D	BnaA03g06250D		BnaA03g34000D	BnaA03g17570D
BnaA03g09480D	BnaA03g06300D		BnaA03g34130D	BnaA03g17580D
BnaA03g09560D	BnaA03g06310D		BnaA03g34230D	BnaA03g17630D
BnaA03g09610D	BnaA03g06360D		BnaA03g34270D	BnaA03g17670D
BnaA03g09660D	BnaA03g06450D		BnaA03g34300D	BnaA03g17740D
BnaA03g09670D	BnaA03g06600D		BnaA03g34330D	BnaA03g17760D
BnaA03g09690D	BnaA03g06650D		BnaA03g34510D	BnaA03g17830D
BnaA03g09700D	BnaA03g06670D		BnaA03g34520D	BnaA03g17850D
BnaA03g09880D	BnaA03g06720D		BnaA03g34740D	BnaA03g17880D
BnaA03g09940D	BnaA03g06750D		BnaA03g34760D	BnaA03g17950D
BnaA03g09980D	BnaA03g06760D		BnaA03g34850D	BnaA03g18030D
BnaA03g09990D	BnaA03g06800D		BnaA03g34880D	BnaA03g18090D
BnaA03g10230D	BnaA03g06810D		BnaA03g34890D	BnaA03g18110D
BnaA03g10240D	BnaA03g06820D		BnaA03g34910D	BnaA03g18140D
BnaA03g10260D	BnaA03g06830D		BnaA03g35010D	BnaA03g18190D
BnaA03g10270D	BnaA03g06840D		BnaA03g35030D	BnaA03g18300D
BnaA03g10310D	BnaA03g06850D		BnaA03g35040D	BnaA03g18360D
BnaA03g10350D	BnaA03g06870D		BnaA03g35090D	BnaA03g18410D
BnaA03g10380D	BnaA03g06880D		BnaA03g35110D	BnaA03g18690D
BnaA03g10390D	BnaA03g06910D		BnaA03g35170D	BnaA03g18710D
BnaA03g10420D	BnaA03g07100D		BnaA03g35310D	BnaA03g18720D
BnaA03g10450D	BnaA03g07170D		BnaA03g35520D	BnaA03g18760D
BnaA03g10480D	BnaA03g07200D		BnaA03g35540D	BnaA03g18800D
BnaA03g10490D	BnaA03g07230D		BnaA03g35750D	BnaA03g18830D
BnaA03g10520D	BnaA03g07290D		BnaA03g35760D	BnaA03g18890D
BnaA03g10530D	BnaA03g07340D		BnaA03g35770D	BnaA03g18920D
BnaA03g10620D	BnaA03g07360D		BnaA03g35790D	BnaA03g18960D
BnaA03g10640D	BnaA03g07400D		BnaA03g35800D	BnaA03g18980D
BnaA03g10650D	BnaA03g07510D		BnaA03g35850D	BnaA03g18990D
BnaA03g10660D	BnaA03g07520D		BnaA03g36060D	BnaA03g19030D
BnaA03g10670D	BnaA03g07570D		BnaA03g36080D	BnaA03g19050D
BnaA03g10690D	BnaA03g07590D		BnaA03g36090D	BnaA03g19060D
BnaA03g10710D	BnaA03g07640D		BnaA03g36110D	BnaA03g19090D
BnaA03g10770D	BnaA03g07670D		BnaA03g36130D	BnaA03g19150D
BnaA03g10790D	BnaA03g07710D		BnaA03g36400D	BnaA03g19220D
BnaA03g10910D	BnaA03g07720D		BnaA03g36460D	BnaA03g19230D
BnaA03g10920D	BnaA03g07800D		BnaA03g36540D	BnaA03g19260D
BnaA03g10940D	BnaA03g07860D		BnaA03g36560D	BnaA03g19290D
BnaA03g11100D	BnaA03g07910D		BnaA03g36620D	BnaA03g19350D
BnaA03g11110D	BnaA03g07920D		BnaA03g36710D	BnaA03g19400D
BnaA03g11150D	BnaA03g07990D		BnaA03g36810D	BnaA03g19410D
BnaA03g11160D	BnaA03g08040D		BnaA03g36840D	BnaA03g19460D
BnaA03g11180D	BnaA03g08050D		BnaA03g36860D	BnaA03g19470D
BnaA03g11190D	BnaA03g08230D		BnaA03g36900D	BnaA03g19480D
BnaA03g11320D	BnaA03g08270D		BnaA03g37010D	BnaA03g19500D
BnaA03g11360D	BnaA03g08340D		BnaA03g37090D	BnaA03g19510D
BnaA03g11410D	BnaA03g08360D		BnaA03g37150D	BnaA03g19520D
BnaA03g11590D	BnaA03g08390D		BnaA03g37190D	BnaA03g19550D
BnaA03g11600D	BnaA03g08460D		BnaA03g37200D	BnaA03g19580D
BnaA03g11650D	BnaA03g08480D		BnaA03g37240D	BnaA03g19660D
BnaA03g11660D	BnaA03g08490D		BnaA03g37250D	BnaA03g19710D
BnaA03g11680D	BnaA03g08520D		BnaA03g37320D	BnaA03g19720D
BnaA03g11690D	BnaA03g08560D		BnaA03g37390D	BnaA03g19740D
BnaA03g11700D	BnaA03g08640D		BnaA03g37430D	BnaA03g19790D
BnaA03g11760D	BnaA03g08660D		BnaA03g37610D	BnaA03g19840D
BnaA03g11780D	BnaA03g08720D		BnaA03g37640D	BnaA03g19900D
BnaA03g11800D	BnaA03g08860D		BnaA03g37650D	BnaA03g19910D
BnaA03g11820D	BnaA03g08910D		BnaA03g37660D	BnaA03g19970D
BnaA03g11850D	BnaA03g08940D		BnaA03g37670D	BnaA03g19990D
BnaA03g11860D	BnaA03g09060D		BnaA03g37730D	BnaA03g20060D
BnaA03g11910D	BnaA03g09140D		BnaA03g37740D	BnaA03g20100D
BnaA03g11920D	BnaA03g09150D		BnaA03g37790D	BnaA03g20140D
BnaA03g11970D	BnaA03g09200D		BnaA03g38030D	BnaA03g20180D
BnaA03g12010D	BnaA03g09260D		BnaA03g38100D	BnaA03g20190D
BnaA03g12120D	BnaA03g09270D		BnaA03g38160D	BnaA03g20210D
BnaA03g12130D	BnaA03g09330D		BnaA03g38190D	BnaA03g20420D
BnaA03g12250D	BnaA03g09390D		BnaA03g38200D	BnaA03g20490D
BnaA03g12260D	BnaA03g09530D		BnaA03g38210D	BnaA03g20590D
BnaA03g12420D	BnaA03g09550D		BnaA03g38230D	BnaA03g20600D
BnaA03g12520D	BnaA03g09600D		BnaA03g38290D	BnaA03g20660D
BnaA03g12560D	BnaA03g09680D		BnaA03g38320D	BnaA03g20670D
BnaA03g12610D	BnaA03g09740D		BnaA03g38380D	BnaA03g20790D
BnaA03g12630D	BnaA03g09800D		BnaA03g38400D	BnaA03g20800D
BnaA03g12700D	BnaA03g09820D		BnaA03g38440D	BnaA03g20900D
BnaA03g12810D	BnaA03g09850D		BnaA03g38470D	BnaA03g20920D
BnaA03g12850D	BnaA03g09900D		BnaA03g38480D	BnaA03g21080D
BnaA03g12860D	BnaA03g09920D		BnaA03g38630D	BnaA03g21090D
BnaA03g12970D	BnaA03g10070D		BnaA03g38670D	BnaA03g21100D
BnaA03g13010D	BnaA03g10110D		BnaA03g38680D	BnaA03g21200D
BnaA03g13040D	BnaA03g10120D		BnaA03g38900D	BnaA03g21300D
BnaA03g13080D	BnaA03g10140D		BnaA03g39040D	BnaA03g21360D
BnaA03g13170D	BnaA03g10150D		BnaA03g39100D	BnaA03g21550D
BnaA03g13210D	BnaA03g10160D		BnaA03g39170D	BnaA03g21560D
BnaA03g13280D	BnaA03g10210D		BnaA03g39200D	BnaA03g21770D
BnaA03g13310D	BnaA03g10250D		BnaA03g39240D	BnaA03g21840D
BnaA03g13320D	BnaA03g10340D		BnaA03g39260D	BnaA03g21850D
BnaA03g13330D	BnaA03g10360D		BnaA03g39290D	BnaA03g22000D
BnaA03g13340D	BnaA03g10440D		BnaA03g39300D	BnaA03g22020D
BnaA03g13490D	BnaA03g10470D		BnaA03g39360D	BnaA03g22030D
BnaA03g13520D	BnaA03g10550D		BnaA03g39380D	BnaA03g22060D
BnaA03g13540D	BnaA03g10560D		BnaA03g39390D	BnaA03g22080D
BnaA03g13570D	BnaA03g10570D		BnaA03g39410D	BnaA03g22100D
BnaA03g13590D	BnaA03g10580D		BnaA03g39420D	BnaA03g22180D
BnaA03g13600D	BnaA03g10680D		BnaA03g39430D	BnaA03g22590D
BnaA03g13610D	BnaA03g10700D		BnaA03g39800D	BnaA03g22610D
BnaA03g13670D	BnaA03g10740D		BnaA03g39860D	BnaA03g22620D
BnaA03g13720D	BnaA03g10970D		BnaA03g39890D	BnaA03g22640D
BnaA03g13730D	BnaA03g10980D		BnaA03g39940D	BnaA03g22670D
BnaA03g13740D	BnaA03g10990D		BnaA03g40020D	BnaA03g22810D
BnaA03g13830D	BnaA03g11030D		BnaA03g40060D	BnaA03g22850D
BnaA03g14010D	BnaA03g11120D		BnaA03g40120D	BnaA03g22870D
BnaA03g14040D	BnaA03g11170D		BnaA03g40150D	BnaA03g22920D
BnaA03g14050D	BnaA03g11200D		BnaA03g40220D	BnaA03g22970D
BnaA03g14140D	BnaA03g11210D		BnaA03g40270D	BnaA03g22990D
BnaA03g14150D	BnaA03g11250D		BnaA03g40400D	BnaA03g23030D
BnaA03g14210D	BnaA03g11290D		BnaA03g40570D	BnaA03g23050D
BnaA03g14260D	BnaA03g11310D		BnaA03g40620D	BnaA03g23060D
BnaA03g14360D	BnaA03g11330D		BnaA03g40630D	BnaA03g23120D
BnaA03g14370D	BnaA03g11340D		BnaA03g40810D	BnaA03g23130D
BnaA03g14380D	BnaA03g11520D		BnaA03g40830D	BnaA03g23140D
BnaA03g14410D	BnaA03g11620D		BnaA03g40840D	BnaA03g23150D
BnaA03g14420D	BnaA03g11710D		BnaA03g40930D	BnaA03g23220D
BnaA03g14430D	BnaA03g11750D		BnaA03g40980D	BnaA03g23240D
BnaA03g14520D	BnaA03g11830D		BnaA03g41040D	BnaA03g23260D
BnaA03g14540D	BnaA03g12050D		BnaA03g41050D	BnaA03g23310D
BnaA03g14550D	BnaA03g12140D		BnaA03g41060D	BnaA03g23340D
BnaA03g14660D	BnaA03g12280D		BnaA03g41140D	BnaA03g23390D
BnaA03g14680D	BnaA03g12320D		BnaA03g41220D	BnaA03g23580D
BnaA03g14730D	BnaA03g12370D		BnaA03g41350D	BnaA03g23600D
BnaA03g14760D	BnaA03g12380D		BnaA03g41370D	BnaA03g23730D
BnaA03g14780D	BnaA03g12450D		BnaA03g41770D	BnaA03g23810D
BnaA03g14790D	BnaA03g12600D		BnaA03g41830D	BnaA03g23830D
BnaA03g14810D	BnaA03g12710D		BnaA03g41870D	BnaA03g23840D
BnaA03g14830D	BnaA03g12740D		BnaA03g41890D	BnaA03g23850D
BnaA03g14850D	BnaA03g12790D		BnaA03g41970D	BnaA03g23860D
BnaA03g14910D	BnaA03g12800D		BnaA03g42010D	BnaA03g23870D
BnaA03g14990D	BnaA03g12900D		BnaA03g42110D	BnaA03g23880D
BnaA03g15030D	BnaA03g12910D		BnaA03g42130D	BnaA03g23950D
BnaA03g15050D	BnaA03g12980D		BnaA03g42190D	BnaA03g23960D
BnaA03g15120D	BnaA03g12990D		BnaA03g42520D	BnaA03g24030D
BnaA03g15270D	BnaA03g13090D		BnaA03g42560D	BnaA03g24070D
BnaA03g15280D	BnaA03g13100D		BnaA03g42690D	BnaA03g24090D
BnaA03g15290D	BnaA03g13110D		BnaA03g42770D	BnaA03g24110D
BnaA03g15330D	BnaA03g13140D		BnaA03g42810D	BnaA03g24180D
BnaA03g15470D	BnaA03g13240D		BnaA03g42820D	BnaA03g24300D
BnaA03g15500D	BnaA03g13250D		BnaA03g42860D	BnaA03g24310D
BnaA03g15510D	BnaA03g13260D		BnaA03g43030D	BnaA03g24320D
BnaA03g15520D	BnaA03g13270D		BnaA03g43160D	BnaA03g24330D
BnaA03g15570D	BnaA03g13290D		BnaA03g43280D	BnaA03g24350D
BnaA03g15580D	BnaA03g13360D		BnaA03g43310D	BnaA03g24520D
BnaA03g15600D	BnaA03g13370D		BnaA03g43500D	BnaA03g24550D
BnaA03g15720D	BnaA03g13380D		BnaA03g43560D	BnaA03g24690D
BnaA03g15750D	BnaA03g13420D		BnaA03g43610D	BnaA03g24920D
BnaA03g15760D	BnaA03g13450D		BnaA03g43640D	BnaA03g24940D
BnaA03g15800D	BnaA03g13460D		BnaA03g43670D	BnaA03g25050D
BnaA03g15870D	BnaA03g13500D		BnaA03g43710D	BnaA03g25060D
BnaA03g15900D	BnaA03g13550D		BnaA03g43720D	BnaA03g25100D
BnaA03g15920D	BnaA03g13580D		BnaA03g43760D	BnaA03g25280D
BnaA03g16020D	BnaA03g13630D		BnaA03g43770D	BnaA03g25300D
BnaA03g16040D	BnaA03g13660D		BnaA03g43870D	BnaA03g25340D
BnaA03g16050D	BnaA03g13690D		BnaA03g43950D	BnaA03g25350D
BnaA03g16090D	BnaA03g13850D		BnaA03g44280D	BnaA03g25360D
BnaA03g16210D	BnaA03g13990D		BnaA03g44340D	BnaA03g25380D
BnaA03g16240D	BnaA03g14020D		BnaA03g44360D	BnaA03g25540D
BnaA03g16250D	BnaA03g14030D		BnaA03g44370D	BnaA03g25590D
BnaA03g16400D	BnaA03g14070D		BnaA03g44400D	BnaA03g25690D
BnaA03g16430D	BnaA03g14090D		BnaA03g44570D	BnaA03g25710D
BnaA03g16500D	BnaA03g14120D		BnaA03g44580D	BnaA03g25790D
BnaA03g16530D	BnaA03g14180D		BnaA03g44600D	BnaA03g25820D
BnaA03g16540D	BnaA03g14200D		BnaA03g44630D	BnaA03g25940D
BnaA03g16620D	BnaA03g14310D		BnaA03g44780D	BnaA03g26040D
BnaA03g16640D	BnaA03g14460D		BnaA03g44820D	BnaA03g26050D
BnaA03g16670D	BnaA03g14490D		BnaA03g44980D	BnaA03g26100D
BnaA03g16690D	BnaA03g14500D		BnaA03g45080D	BnaA03g26290D
BnaA03g16750D	BnaA03g14510D		BnaA03g45230D	BnaA03g26320D
BnaA03g16830D	BnaA03g14560D		BnaA03g45240D	BnaA03g26340D
BnaA03g16860D	BnaA03g14610D		BnaA03g45460D	BnaA03g26370D
BnaA03g16890D	BnaA03g14650D		BnaA03g45480D	BnaA03g26380D
BnaA03g16960D	BnaA03g14700D		BnaA03g45520D	BnaA03g26410D
BnaA03g16990D	BnaA03g14740D		BnaA03g45530D	BnaA03g26430D
BnaA03g17010D	BnaA03g14770D		BnaA03g45630D	BnaA03g26540D
BnaA03g17030D	BnaA03g14820D		BnaA03g45640D	BnaA03g26590D
BnaA03g17040D	BnaA03g14880D		BnaA03g45680D	BnaA03g26620D
BnaA03g17070D	BnaA03g14980D		BnaA03g45690D	BnaA03g26660D
BnaA03g17090D	BnaA03g15020D		BnaA03g45700D	BnaA03g26670D
BnaA03g17100D	BnaA03g15080D		BnaA03g45810D	BnaA03g26690D
BnaA03g17110D	BnaA03g15090D		BnaA03g46110D	BnaA03g26790D
BnaA03g17150D	BnaA03g15100D		BnaA03g46130D	BnaA03g26820D
BnaA03g17170D	BnaA03g15180D		BnaA03g46200D	BnaA03g26850D
BnaA03g17200D	BnaA03g15200D		BnaA03g46210D	BnaA03g26870D
BnaA03g17210D	BnaA03g15210D		BnaA03g46300D	BnaA03g26890D
BnaA03g17270D	BnaA03g15220D		BnaA03g46460D	BnaA03g26930D
BnaA03g17310D	BnaA03g15350D		BnaA03g46470D	BnaA03g26970D
BnaA03g17460D	BnaA03g15360D		BnaA03g46490D	BnaA03g26980D
BnaA03g17470D	BnaA03g15370D		BnaA03g46670D	BnaA03g27000D
BnaA03g17500D	BnaA03g15380D		BnaA03g46700D	BnaA03g27040D
BnaA03g17530D	BnaA03g15390D		BnaA03g46760D	BnaA03g27080D
BnaA03g17540D	BnaA03g15610D		BnaA03g46890D	BnaA03g27140D
BnaA03g17640D	BnaA03g15740D		BnaA03g47010D	BnaA03g27190D
BnaA03g17660D	BnaA03g15830D		BnaA03g47020D	BnaA03g27210D
BnaA03g17750D	BnaA03g15930D		BnaA03g47050D	BnaA03g27230D
BnaA03g17810D	BnaA03g15980D		BnaA03g47070D	BnaA03g27300D
BnaA03g17820D	BnaA03g16110D		BnaA03g47120D	BnaA03g27350D
BnaA03g17870D	BnaA03g16130D		BnaA03g47130D	BnaA03g27420D
BnaA03g17890D	BnaA03g16160D		BnaA03g47210D	BnaA03g27450D
BnaA03g17910D	BnaA03g16200D		BnaA03g47220D	BnaA03g27460D
BnaA03g17960D	BnaA03g16230D		BnaA03g47280D	BnaA03g27500D
BnaA03g18010D	BnaA03g16270D		BnaA03g47290D	BnaA03g27510D
BnaA03g18080D	BnaA03g16300D		BnaA03g47300D	BnaA03g27600D
BnaA03g18140D	BnaA03g16310D		BnaA03g47310D	BnaA03g27760D
BnaA03g18170D	BnaA03g16340D		BnaA03g47600D	BnaA03g27770D
BnaA03g18230D	BnaA03g16370D		BnaA03g47610D	BnaA03g27780D
BnaA03g18420D	BnaA03g16460D		BnaA03g48400D	BnaA03g27820D
BnaA03g18480D	BnaA03g16520D		BnaA03g48420D	BnaA03g27860D
BnaA03g18540D	BnaA03g16590D		BnaA03g48540D	BnaA03g27990D
BnaA03g18600D	BnaA03g16600D		BnaA03g48570D	BnaA03g28040D
BnaA03g18620D	BnaA03g16760D		BnaA03g48590D	BnaA03g28140D
BnaA03g18630D	BnaA03g16790D		BnaA03g48600D	BnaA03g28190D
BnaA03g18640D	BnaA03g16880D		BnaA03g48640D	BnaA03g28220D
BnaA03g18650D	BnaA03g16930D		BnaA03g48720D	BnaA03g28280D
BnaA03g18670D	BnaA03g16950D		BnaA03g48760D	BnaA03g28360D
BnaA03g18680D	BnaA03g16970D		BnaA03g48780D	BnaA03g28370D
BnaA03g18700D	BnaA03g17000D		BnaA03g48840D	BnaA03g28390D
BnaA03g18780D	BnaA03g17020D		BnaA03g48850D	BnaA03g28490D
BnaA03g18820D	BnaA03g17050D		BnaA03g48910D	BnaA03g28530D
BnaA03g18840D	BnaA03g17190D		BnaA03g48970D	BnaA03g28550D
BnaA03g18900D	BnaA03g17240D		BnaA03g49270D	BnaA03g28570D
BnaA03g18970D	BnaA03g17260D		BnaA03g49280D	BnaA03g28700D
BnaA03g19010D	BnaA03g17290D		BnaA03g49290D	BnaA03g28710D
BnaA03g19030D	BnaA03g17330D		BnaA03g49300D	BnaA03g28720D
BnaA03g19100D	BnaA03g17340D		BnaA03g49560D	BnaA03g28730D
BnaA03g19170D	BnaA03g17360D		BnaA03g49740D	BnaA03g28850D
BnaA03g19180D	BnaA03g17380D		BnaA03g50030D	BnaA03g28870D
BnaA03g19190D	BnaA03g17390D		BnaA03g50060D	BnaA03g28950D
BnaA03g19280D	BnaA03g17410D		BnaA03g50070D	BnaA03g29110D
BnaA03g19320D	BnaA03g17440D		BnaA03g50090D	BnaA03g29230D
BnaA03g19340D	BnaA03g17450D		BnaA03g50100D	BnaA03g29250D
BnaA03g19360D	BnaA03g17490D		BnaA03g50200D	BnaA03g29500D
BnaA03g19430D	BnaA03g17560D		BnaA03g50210D	BnaA03g29540D
BnaA03g19440D	BnaA03g17570D		BnaA03g50240D	BnaA03g29630D
BnaA03g19530D	BnaA03g17580D		BnaA03g50300D	BnaA03g29650D
BnaA03g19570D	BnaA03g17630D		BnaA03g50330D	BnaA03g29680D
BnaA03g19630D	BnaA03g17670D		BnaA03g50380D	BnaA03g29740D
BnaA03g19680D	BnaA03g17740D		BnaA03g50410D	BnaA03g29760D
BnaA03g19850D	BnaA03g17760D		BnaA03g50420D	BnaA03g29850D
BnaA03g19860D	BnaA03g17830D		BnaA03g50450D	BnaA03g29970D
BnaA03g19880D	BnaA03g17880D		BnaA03g50480D	BnaA03g30030D
BnaA03g19950D	BnaA03g17970D		BnaA03g50710D	BnaA03g30060D
BnaA03g19960D	BnaA03g17980D		BnaA03g50740D	BnaA03g30080D
BnaA03g20030D	BnaA03g18020D		BnaA03g50850D	BnaA03g30300D
BnaA03g20050D	BnaA03g18030D		BnaA03g50870D	BnaA03g30410D
BnaA03g20080D	BnaA03g18090D		BnaA03g50880D	BnaA03g30420D
BnaA03g20150D	BnaA03g18110D		BnaA03g50900D	BnaA03g30440D
BnaA03g20230D	BnaA03g18300D		BnaA03g50990D	BnaA03g30450D
BnaA03g20240D	BnaA03g18360D		BnaA03g51000D	BnaA03g30530D
BnaA03g20290D	BnaA03g18410D		BnaA03g51010D	BnaA03g30740D
BnaA03g20300D	BnaA03g18570D		BnaA03g51100D	BnaA03g30840D
BnaA03g20310D	BnaA03g18710D		BnaA03g51180D	BnaA03g30860D
BnaA03g20340D	BnaA03g18720D		BnaA03g51220D	BnaA03g30890D
BnaA03g20350D	BnaA03g18730D		BnaA03g51290D	BnaA03g30900D
BnaA03g20360D	BnaA03g18760D		BnaA03g51360D	BnaA03g30960D
BnaA03g20510D	BnaA03g18770D		BnaA03g51440D	BnaA03g31040D
BnaA03g20570D	BnaA03g18800D		BnaA03g51530D	BnaA03g31050D
BnaA03g20650D	BnaA03g18810D		BnaA03g51580D	BnaA03g31070D
BnaA03g20690D	BnaA03g18890D		BnaA03g51590D	BnaA03g31090D
BnaA03g20730D	BnaA03g18920D		BnaA03g51750D	BnaA03g31100D
BnaA03g20770D	BnaA03g18980D		BnaA03g51780D	BnaA03g31120D
BnaA03g20860D	BnaA03g19000D		BnaA03g51910D	BnaA03g31130D
BnaA03g20870D	BnaA03g19050D		BnaA03g52250D	BnaA03g31190D
BnaA03g20930D	BnaA03g19060D		BnaA03g52340D	BnaA03g31270D
BnaA03g20960D	BnaA03g19090D		BnaA03g52500D	BnaA03g31280D
BnaA03g20980D	BnaA03g19220D		BnaA03g52510D	BnaA03g31300D
BnaA03g21030D	BnaA03g19230D		BnaA03g52550D	BnaA03g31420D
BnaA03g21060D	BnaA03g19260D		BnaA03g52560D	BnaA03g31540D
BnaA03g21190D	BnaA03g19270D		BnaA03g52680D	BnaA03g31560D
BnaA03g21220D	BnaA03g19290D		BnaA03g52730D	BnaA03g31570D
BnaA03g21260D	BnaA03g19350D		BnaA03g52770D	BnaA03g31640D
BnaA03g21270D	BnaA03g19420D		BnaA03g52830D	BnaA03g31850D
BnaA03g21310D	BnaA03g19460D		BnaA03g53010D	BnaA03g31890D
BnaA03g21490D	BnaA03g19480D		BnaA03g53060D	BnaA03g31920D
BnaA03g21570D	BnaA03g19510D		BnaA03g53070D	BnaA03g32030D
BnaA03g21590D	BnaA03g19550D		BnaA03g53190D	BnaA03g32210D
BnaA03g21620D	BnaA03g19580D		BnaA03g53200D	BnaA03g32230D
BnaA03g21640D	BnaA03g19600D		BnaA03g53320D	BnaA03g32350D
BnaA03g21660D	BnaA03g19610D		BnaA03g53360D	BnaA03g32440D
BnaA03g21670D	BnaA03g19640D		BnaA03g53370D	BnaA03g32530D
BnaA03g21680D	BnaA03g19660D		BnaA03g53420D	BnaA03g32550D
BnaA03g21790D	BnaA03g19670D		BnaA03g53440D	BnaA03g32570D
BnaA03g21810D	BnaA03g19710D		BnaA03g53450D	BnaA03g32580D
BnaA03g21900D	BnaA03g19720D		BnaA03g53750D	BnaA03g32620D
BnaA03g21910D	BnaA03g19740D		BnaA03g53800D	BnaA03g32670D
BnaA03g21920D	BnaA03g19840D		BnaA03g53940D	BnaA03g32720D
BnaA03g21960D	BnaA03g19910D		BnaA03g53950D	BnaA03g32790D
BnaA03g21970D	BnaA03g19940D		BnaA03g54160D	BnaA03g32990D
BnaA03g22000D	BnaA03g19970D		BnaA03g54400D	BnaA03g33080D
BnaA03g22040D	BnaA03g19990D		BnaA03g54420D	BnaA03g33110D
BnaA03g22090D	BnaA03g20060D		BnaA03g54430D	BnaA03g33190D
BnaA03g22110D	BnaA03g20090D		BnaA03g54610D	BnaA03g33210D
BnaA03g22120D	BnaA03g20100D		BnaA03g54620D	BnaA03g33240D
BnaA03g22290D	BnaA03g20140D		BnaA03g54680D	BnaA03g33270D
BnaA03g22310D	BnaA03g20190D		BnaA03g54830D	BnaA03g33300D
BnaA03g22320D	BnaA03g20220D		BnaA03g54860D	BnaA03g33370D
BnaA03g22330D	BnaA03g20420D		BnaA03g54890D	BnaA03g33410D
BnaA03g22350D	BnaA03g20490D		BnaA03g54910D	BnaA03g33480D
BnaA03g22360D	BnaA03g20600D		BnaA03g54920D	BnaA03g33490D
BnaA03g22390D	BnaA03g20670D		BnaA03g54940D	BnaA03g33540D
BnaA03g22400D	BnaA03g20720D		BnaA03g54960D	BnaA03g33550D
BnaA03g22460D	BnaA03g20740D		BnaA03g55100D	BnaA03g33570D
BnaA03g22470D	BnaA03g20790D		BnaA03g55310D	BnaA03g33620D
BnaA03g22490D	BnaA03g20800D		BnaA03g55320D	BnaA03g33640D
BnaA03g22500D	BnaA03g20840D		BnaA03g55400D	BnaA03g33680D
BnaA03g22520D	BnaA03g20850D		BnaA03g55410D	BnaA03g33780D
BnaA03g22540D	BnaA03g20920D		BnaA03g55550D	BnaA03g33840D
BnaA03g22590D	BnaA03g21070D		BnaA03g55570D	BnaA03g33870D
BnaA03g22640D	BnaA03g21080D		BnaA03g55670D	BnaA03g33910D
BnaA03g22690D	BnaA03g21090D		BnaA03g55680D	BnaA03g33930D
BnaA03g22710D	BnaA03g21100D		BnaA03g55840D	BnaA03g33970D
BnaA03g22720D	BnaA03g21120D		BnaA03g55890D	BnaA03g33980D
BnaA03g22740D	BnaA03g21200D		BnaA03g55990D	BnaA03g34010D
BnaA03g22790D	BnaA03g21210D		BnaA03g56000D	BnaA03g34080D
BnaA03g22980D	BnaA03g21240D		BnaA03g56030D	BnaA03g34110D
BnaA03g23000D	BnaA03g21360D		BnaA03g56050D	BnaA03g34140D
BnaA03g23010D	BnaA03g21560D		BnaA03g56130D	BnaA03g34150D
BnaA03g23090D	BnaA03g21700D		BnaA03g56140D	BnaA03g34210D
BnaA03g23160D	BnaA03g21710D		BnaA03g56300D	BnaA03g34220D
BnaA03g23290D	BnaA03g21720D		BnaA03g56320D	BnaA03g34240D
BnaA03g23300D	BnaA03g21760D		BnaA03g56350D	BnaA03g34290D
BnaA03g23420D	BnaA03g21770D		BnaA03g56430D	BnaA03g34310D
BnaA03g23430D	BnaA03g21820D		BnaA03g56470D	BnaA03g34320D
BnaA03g23460D	BnaA03g21840D		BnaA03g56530D	BnaA03g34340D
BnaA03g23470D	BnaA03g21850D		BnaA03g56550D	BnaA03g34400D
BnaA03g23520D	BnaA03g21890D		BnaA03g56560D	BnaA03g34490D
BnaA03g23550D	BnaA03g21950D		BnaA03g56770D	BnaA03g34630D
BnaA03g23560D	BnaA03g22020D		BnaA03g56830D	BnaA03g34800D
BnaA03g23590D	BnaA03g22060D		BnaA03g56900D	BnaA03g34820D
BnaA03g23640D	BnaA03g22080D		BnaA03g56950D	BnaA03g34940D
BnaA03g23650D	BnaA03g22100D		BnaA03g56970D	BnaA03g34970D
BnaA03g23660D	BnaA03g22180D		BnaA03g57110D	BnaA03g35000D
BnaA03g23670D	BnaA03g22200D		BnaA03g57210D	BnaA03g35100D
BnaA03g23820D	BnaA03g22370D		BnaA03g57320D	BnaA03g35120D
BnaA03g23930D	BnaA03g22380D		BnaA03g57570D	BnaA03g35190D
BnaA03g23970D	BnaA03g22510D		BnaA03g57730D	BnaA03g35220D
BnaA03g24000D	BnaA03g22600D		BnaA03g57850D	BnaA03g35260D
BnaA03g24050D	BnaA03g22610D		BnaA03g57860D	BnaA03g35400D
BnaA03g24120D	BnaA03g22670D		BnaA03g57880D	BnaA03g35490D
BnaA03g24140D	BnaA03g22780D		BnaA03g57920D	BnaA03g35510D
BnaA03g24160D	BnaA03g22810D		BnaA03g58000D	BnaA03g35570D
BnaA03g24240D	BnaA03g22860D		BnaA03g58220D	BnaA03g35580D
BnaA03g24250D	BnaA03g22870D		BnaA03g58240D	BnaA03g35600D
BnaA03g24340D	BnaA03g22920D		BnaA03g58290D	BnaA03g35640D
BnaA03g24390D	BnaA03g22970D		BnaA03g58300D	BnaA03g35660D
BnaA03g24410D	BnaA03g22990D		BnaA03g58330D	BnaA03g35670D
BnaA03g24420D	BnaA03g23020D		BnaA03g58370D	BnaA03g35840D
BnaA03g24430D	BnaA03g23060D		BnaA03g58410D	BnaA03g35870D
BnaA03g24590D	BnaA03g23070D		BnaA03g58510D	BnaA03g35880D
BnaA03g24680D	BnaA03g23130D		BnaA03g58530D	BnaA03g35930D
BnaA03g24730D	BnaA03g23140D		BnaA03g58600D	BnaA03g35990D
BnaA03g24750D	BnaA03g23220D		BnaA03g58610D	BnaA03g36010D
BnaA03g24760D	BnaA03g23260D		BnaA03g58720D	BnaA03g36140D
BnaA03g24810D	BnaA03g23310D		BnaA03g58730D	BnaA03g36160D
BnaA03g24870D	BnaA03g23330D		BnaA03g58750D	BnaA03g36210D
BnaA03g24880D	BnaA03g23340D		BnaA03g58950D	BnaA03g36230D
BnaA03g24890D	BnaA03g23480D		BnaA03g59000D	BnaA03g36300D
BnaA03g25020D	BnaA03g23530D		BnaA03g59130D	BnaA03g36320D
BnaA03g25240D	BnaA03g23580D		BnaA03g59290D	BnaA03g36340D
BnaA03g25330D	BnaA03g23790D		BnaA03g59360D	BnaA03g36440D
BnaA03g25430D	BnaA03g23830D		BnaA03g59370D	BnaA03g36530D
BnaA03g25440D	BnaA03g23840D		BnaA03g59590D	BnaA03g36550D
BnaA03g25450D	BnaA03g23850D		BnaA03g59790D	BnaA03g36570D
BnaA03g25460D	BnaA03g23870D		BnaA03g59960D	BnaA03g36700D
BnaA03g25490D	BnaA03g23880D		BnaA03g59990D	BnaA03g36790D
BnaA03g25510D	BnaA03g23900D		BnaA03g60000D	BnaA03g36800D
BnaA03g25550D	BnaA03g23940D		BnaA03g60150D	BnaA03g36910D
BnaA03g25580D	BnaA03g23950D		BnaA03g60190D	BnaA03g36940D
BnaA03g25600D	BnaA03g24030D		BnaA03g60200D	BnaA03g36950D
BnaA03g25610D	BnaA03g24070D		BnaA03g60240D	BnaA03g37070D
BnaA03g25630D	BnaA03g24090D		BnaA03g60370D	BnaA03g37120D
[truncated: 17,273 more rows]
