# Supplementary material for: Analysis of Tissue-Specific Defense Responses to Sclerotinia sclerotiorum in Brassica napus
Source: Plants (Basel). 2022 Jul 31;11(15):2001. doi: 10.3390/plants11152001 (PMC9370628; doi:10.3390/plants11152001)
Supplement: Supplementary file 1 [file plants-11-02001-s001.zip › plants-1826220-supplementary/Table S3.xlsx]

## Sheet: Table S3
Supplementary table 3 - KEGG enrichment result
Term Name	MainClass	GeneHitsInSelectedSet	AllGenesInSelectedSet	GeneHitsInBackground	AllGenesInBackground	p-value	enrichFactor	GeneListInSelectedSets	corrected p-value(BH method)
B 09103 Lipid metabolism	A09100 Metabolism	5	14	1379	18613	0.00251761	4.82052	[BnaCnng78230D, BnaA07g38540D, BnaC04g27780D, BnaCnng38640D, BnaC06g18870D]	0.0239173
A09100 Metabolism	A09100 Metabolism	12	14	8861	18613	0.00387818	1.80047	[BnaCnng78230D, BnaA05g10890D, BnaC08g29670D, BnaC04g10980D, BnaC05g07900D, BnaC04g12350D, BnaA07g38540D, BnaC04g27780D, BnaC09g14710D, BnaCnng38640D, BnaC06g18870D, BnaC09g43250D]	0.0294742
