# Supplementary material for: Analysis of Tissue-Specific Defense Responses to Sclerotinia sclerotiorum in Brassica napus
Source: Plants (Basel). 2022 Jul 31;11(15):2001. doi: 10.3390/plants11152001 (PMC9370628; doi:10.3390/plants11152001)
Supplement: Supplementary file 1 [file plants-11-02001-s001.zip › plants-1826220-supplementary/Table S4.xlsx]

## Sheet: Table S4
Supplementary table 4 - Result of predicted KEGG pathway
KEGG_A_class	KEGG_B_class	Pathway	Count (18520)	Pathway ID	Genes	K_IDs
Metabolism	Global and overview maps	Metabolic pathways	8144	ko01100	BnaA01g00210D;BnaA01g00240D;BnaA01g01360D;BnaA01g02880D;BnaA01g04110D;BnaA01g07610D;BnaA01g11910D;BnaA01g13390D;BnaA01g13990D;BnaA01g15080D;BnaA01g15090D;BnaA01g15420D;BnaA01g15640D;BnaA01g17630D;BnaA01g17800D;BnaA01g20680D;BnaA01g21340D;BnaA01g22040D;BnaA01g24280D;BnaA01g27130D;BnaA01g30320D;BnaA01g33660D;BnaA01g37380D;BnaA01g37400D;BnaA02g05770D;BnaA02g08190D;BnaA02g08550D;BnaA02g11520D;BnaA02g…
BnaC02g04740D;BnaC02g04750D;BnaC02g04760D;BnaC02g08330D;BnaC02g08480D;BnaC02g11560D;BnaC02g12480D;BnaC02g13180D;BnaC02g14310D;BnaC02g14820D;BnaC02g14930D;BnaC02g16510D;BnaC02g18050D;BnaC02g21910D;BnaC02g23800D;BnaC02g27030D;BnaC02g27060D;BnaC02g28880D;BnaC02g31330D;BnaC02g33050D;BnaC02g33390D;BnaC02g33570D;BnaC02g33620D;BnaC02g34290D;BnaC02g35570D;BnaC02g36780D;BnaC02g37420D;BnaC02g38290D;BnaC02g…
BnaC07g17050D;BnaC07g41800D;BnaC07g41810D;BnaC07g41830D;BnaC07g41840D;BnaC07g46990D;BnaC07g47000D;BnaC07g47010D;BnaC07g47020D;BnaC07g47180D;BnaC08g29380D;BnaC09g02360D;BnaC09g02370D;BnaC09g43190D;BnaCnng19940D;BnaCnng44020D;BnaCnng44420D;BnaCnng47880D;BnaCnng77310D;BnaA02g11830D;BnaA04g06620D;BnaA09g34980D;BnaAnng08940D;BnaC01g41740D;BnaC02g16260D;BnaC04g29310D;BnaC05g06150D;BnaC08g08850D;BnaC08g…
BnaA09g14820D;BnaA09g14830D;BnaA09g16640D;BnaA09g27040D;BnaA09g32370D;BnaA09g40430D;BnaA09g40440D;BnaA09g50920D;BnaA09g51390D;BnaA09g57180D;BnaA10g01010D;BnaA10g01960D;BnaA10g02050D;BnaA10g02760D;BnaA10g07300D;BnaA10g08760D;BnaA10g08780D;BnaA10g16310D;BnaA10g19460D;BnaA10g23080D;BnaAnng06210D;BnaAnng07160D;BnaAnng19090D;BnaAnng25090D;BnaAnng28520D;BnaAnng32890D;BnaAnng32900D;BnaAnng41980D;BnaC01g…	K01610+K00844+K00128+K00128+K00850+K00850+K00121+K01792+K01810+K01792+K01792+K00850+K01623+K00382+K00016+K00873+K15634+K00161+K00873+K01785+K00927+K00134+K01568+K00873+K15634+K01792+K00850+K00162+K01834+K00927+K15634+K01623+K00001+K00873+K01792+K01785+K01785+K01792+K00850+K00873+K00162+K01689+K01785+K00873+K00134+K00927+K00627+K00382+K00873+K00850+K15634+K00382+K00016+K01792+K01810+K00128+K00873+…
K10712+K18592+K18592+K18592+K18592+K18592+K18592+K18592+K18592+K18592+K10712+K18592+K18592+K10712+K18592+K18592+K10712+K10712+K10712+K08247+K01874+K01874+K01874+K01874+K08247+K01874+K11717+K01874+K01874+K01455+K01455+K05350+K05350+K01188+K05350+K05350+K01188+K01188+K05350+K01188+K05349+K13035+K08248+K08248+K01188+K01188+K08248+K05349+K05349+K01188+K01188+K01188+K05350+K05350+K05350+K01188+K05349+…
Metabolism	Global and overview maps	Biosynthesis of secondary metabolites	4516	ko01110	BnaA01g00210D;BnaA01g00240D;BnaA01g01360D;BnaA01g02880D;BnaA01g04110D;BnaA01g07610D;BnaA01g11910D;BnaA01g13390D;BnaA01g13990D;BnaA01g15080D;BnaA01g15090D;BnaA01g15420D;BnaA01g15640D;BnaA01g17630D;BnaA01g17800D;BnaA01g20680D;BnaA01g21340D;BnaA01g22040D;BnaA01g24280D;BnaA01g27130D;BnaA01g30320D;BnaA01g33660D;BnaA01g37380D;BnaA01g37400D;BnaA02g05770D;BnaA02g08190D;BnaA02g08550D;BnaA02g11520D;BnaA02g…
BnaC01g09790D;BnaC07g00580D;BnaC07g00610D;BnaC07g00620D;BnaC08g36370D;BnaC09g10380D;BnaA01g15400D;BnaA01g15410D;BnaA02g13460D;BnaA02g13470D;BnaA03g50850D;BnaA04g04830D;BnaA04g11940D;BnaA04g21230D;BnaA04g21240D;BnaA05g07370D;BnaA05g28470D;BnaA07g16060D;BnaA07g26750D;BnaA08g11640D;BnaA08g19210D;BnaA09g33560D;BnaAnng06470D;BnaAnng17700D;BnaC01g18290D;BnaC01g18300D;BnaC02g17730D;BnaC03g77170D;BnaC03g…	K01610+K00844+K00128+K00128+K00850+K00850+K00121+K01792+K01810+K01792+K01792+K00850+K01623+K00382+K00016+K00873+K15634+K00161+K00873+K01785+K00927+K00134+K01568+K00873+K15634+K01792+K00850+K00162+K01834+K00927+K15634+K01623+K00001+K00873+K01792+K01785+K01785+K01792+K00850+K00873+K00162+K01689+K01785+K00873+K00134+K00927+K00627+K00382+K00873+K00850+K15634+K00382+K00016+K01792+K01810+K00128+K00873+…
Genetic Information Processing	Translation	Ribosome	1347	ko03010	BnaA01g01470D;BnaA01g02490D;BnaA01g02540D;BnaA01g03150D;BnaA01g04920D;BnaA01g05130D;BnaA01g05390D;BnaA01g06210D;BnaA01g07430D;BnaA01g07450D;BnaA01g07470D;BnaA01g08080D;BnaA01g08920D;BnaA01g09540D;BnaA01g13300D;BnaA01g14310D;BnaA01g14960D;BnaA01g15390D;BnaA01g16130D;BnaA01g20600D;BnaA01g20630D;BnaA01g21860D;BnaA01g22880D;BnaA01g23500D;BnaA01g23850D;BnaA01g24680D;BnaA01g24800D;BnaA01g25840D;BnaA01g…	K02938+K02984+K02959+K02980+K02924+K02991+K02975+K02888+K02957+K02903+K02983+K02971+K02912+K02868+K02897+K02936+K02947+K02910+K02875+K02949+K02873+K02981+K02998+K02965+K02929+K02881+K02901+K02983+K02969+K02908+K02906+K02922+K02968+K02946+K02946+K02864+K02973+K02930+K02905+K02993+K02966+K02974+K02984+K02894+K02960+K02890+K02982+K02878+K02874+K02967+K02967+K02892+K02885+K02958+K02991+K02864+K02881+…
Environmental Information Processing	Signal transduction	Plant hormone signal transduction	1179	ko04075	BnaA01g00580D;BnaA01g01040D;BnaA01g01490D;BnaA01g02190D;BnaA01g02380D;BnaA01g02390D;BnaA01g02400D;BnaA01g02410D;BnaA01g02420D;BnaA01g02430D;BnaA01g02970D;BnaA01g03110D;BnaA01g03250D;BnaA01g03260D;BnaA01g03510D;BnaA01g04710D;BnaA01g05190D;BnaA01g05490D;BnaA01g05940D;BnaA01g07810D;BnaA01g08280D;BnaA01g08750D;BnaA01g08850D;BnaA01g09460D;BnaA01g09530D;BnaA01g10220D;BnaA01g12240D;BnaA01g12340D;BnaA01g…	K14487+K14503+K14488+K14500+K14488+K14488+K14488+K14488+K14488+K14488+K14505+K14498+K13449+K13449+K13416+K14484+K14488+K13415+K14488+K14484+K14484+K13422+K14500+K14496+K14502+K14508+K14505+K14488+K14486+K14495+K14497+K14508+K14508+K14487+K14496+K14491+K14497+K14505+K14498+K14497+K14516+K14509+K14484+K14490+K14432+K13464+K14484+K14484+K14484+K14488+K14431+K14484+K14509+K14498+K14486+K14514+K14497+…
Metabolism	Global and overview maps	Carbon metabolism	1101	ko01200	BnaA01g00210D;BnaA01g00240D;BnaA01g04110D;BnaA01g07610D;BnaA01g11910D;BnaA01g13990D;BnaA01g15420D;BnaA01g15640D;BnaA01g17630D;BnaA01g20680D;BnaA01g21340D;BnaA01g22040D;BnaA01g24280D;BnaA01g30320D;BnaA01g33660D;BnaA01g37400D;BnaA02g05770D;BnaA02g08550D;BnaA02g11520D;BnaA02g18710D;BnaA02g19260D;BnaA02g24710D;BnaA02g27140D;BnaA03g02560D;BnaA03g10690D;BnaA03g10910D;BnaA03g13490D;BnaA03g16750D;BnaA03g…	K01610+K00844+K00850+K00850+K00121+K01810+K00850+K01623+K00382+K00873+K15634+K00161+K00873+K00927+K00134+K00873+K15634+K00850+K00162+K01834+K00927+K15634+K01623+K00873+K00850+K00873+K00162+K01689+K00873+K00134+K00927+K00627+K00382+K00873+K00850+K15634+K00382+K01810+K00873+K01610+K00161+K01803+K01803+K03841+K00873+K01623+K00627+K00627+K00873+K01803+K01623+K01895+K01895+K00131+K01689+K03841+K01689+…
Metabolism	Global and overview maps	Biosynthesis of amino acids	1003	ko01230	BnaA01g04110D;BnaA01g07610D;BnaA01g15420D;BnaA01g15640D;BnaA01g20680D;BnaA01g21340D;BnaA01g24280D;BnaA01g30320D;BnaA01g33660D;BnaA01g37400D;BnaA02g05770D;BnaA02g08550D;BnaA02g18710D;BnaA02g19260D;BnaA02g24710D;BnaA02g27140D;BnaA03g02560D;BnaA03g10690D;BnaA03g10910D;BnaA03g16750D;BnaA03g28460D;BnaA03g28480D;BnaA03g32440D;BnaA03g36910D;BnaA03g40360D;BnaA03g40860D;BnaA03g52820D;BnaA04g03580D;BnaA04g…	K00850+K00850+K00850+K01623+K00873+K15634+K00873+K00927+K00134+K00873+K15634+K00850+K01834+K00927+K15634+K01623+K00873+K00850+K00873+K01689+K00873+K00134+K00927+K00873+K00850+K15634+K00873+K01803+K01803+K00873+K01623+K00873+K01803+K01623+K01689+K01689+K15633+K00134+K01689+K00873+K00873+K00850+K00134+K00134+K00873+K00850+K01623+K01623+K00873+K01689+K00927+K00134+K01689+K01834+K00927+K01803+K00850+…
Genetic Information Processing	Folding, sorting and degradation	Protein processing in endoplasmic reticulum	792	ko04141	BnaA01g11060D;BnaA01g36460D;BnaA01g36480D;BnaA02g04400D;BnaA02g25880D;BnaA02g34720D;BnaA03g07700D;BnaA03g36080D;BnaA03g58520D;BnaA05g16320D;BnaA05g18450D;BnaA05g18460D;BnaA05g19890D;BnaA06g02240D;BnaA06g22950D;BnaA06g22960D;BnaA06g34690D;BnaA07g08990D;BnaA07g12390D;BnaA07g21400D;BnaA07g24990D;BnaA07g32680D;BnaA08g01930D;BnaA08g06950D;BnaA08g17630D;BnaA08g25260D;BnaA09g07760D;BnaA09g23290D;BnaA09g…	K12667+K12669+K12669+K07151+K12666+K12670+K07151+K01230+K12667+K12668+K07151+K07151+K01230+K01230+K05546+K05546+K12666+K01228+K12670+K12666+K01228+K12666+K01230+K12668+K01230+K12669+K12670+K07151+K12668+K01230+K05546+K05546+K01228+K07151+K01228+K12667+K12669+K07151+K12668+K12666+K12668+K07151+K12668+K01230+K05546+K05546+K01230+K12667+K01230+K12669+K01230+K07151+K07151+K07151+K12668+K01230+K01230+…
Genetic Information Processing	Transcription	Spliceosome	784	ko03040	BnaA01g12190D;BnaA02g21230D;BnaA03g07960D;BnaA03g25240D;BnaA09g20820D;BnaC01g13870D;BnaC02g26240D;BnaC03g10010D;BnaC03g29670D;BnaC09g23090D;BnaC09g37610D;BnaA01g05690D;BnaA01g25900D;BnaA02g00210D;BnaA02g06620D;BnaA03g35410D;BnaA03g38370D;BnaA03g54780D;BnaA04g08240D;BnaA05g15240D;BnaA05g36790D;BnaA06g02320D;BnaA06g36240D;BnaA07g25750D;BnaA08g01960D;BnaA08g09600D;BnaA08g16340D;BnaA08g19200D;BnaA10g…	K12845+K12845+K12845+K12845+K12845+K12845+K12845+K12845+K12845+K12845+K12845+K12875+K13025+K12878+K12881+K13025+K12882+K12881+K12881+K12876+K13025+K12876+K12883+K12881+K12876+K12881+K12875+K12879+K12877+K12880+K12881+K12881+K13025+K12875+K13025+K12878+K12881+K12812+K12881+K13025+K13025+K12875+K12876+K12881+K12812+K12877+K12879+K13025+K13025+K13025+K12812+K12876+K12876+K12883+K12882+K12882+K12882+…
Organismal Systems	Environmental adaptation	Plant-pathogen interaction	766	ko04626	BnaA01g02870D;BnaA02g22340D;BnaA02g30560D;BnaA02g35570D;BnaA03g39010D;BnaA03g41660D;BnaA03g51030D;BnaA04g06040D;BnaA04g15380D;BnaA04g16560D;BnaA05g01150D;BnaA06g04280D;BnaA06g13570D;BnaA06g13650D;BnaA06g36580D;BnaA07g03590D;BnaA07g14020D;BnaA07g23630D;BnaA07g24600D;BnaA08g11130D;BnaA08g11140D;BnaA08g27750D;BnaA09g08660D;BnaA09g08670D;BnaA09g28510D;BnaA09g40640D;BnaA09g44160D;BnaA09g51530D;BnaA10g…	K15397+K15397+K15397+K15397+K15397+K15397+K15397+K18880+K15397+K15397+K15397+K15397+K15397+K15397+K15397+K15397+K15397+K15397+K15397+K15397+K15397+K15397+K15397+K15397+K15397+K15397+K15397+K15397+K15397+K15397+K15397+K15397+K15397+K15397+K15397+K15397+K15397+K15397+K15397+K15397+K15397+K15397+K15397+K15397+K15397+K15397+K15397+K15397+K15397+K18880+K15397+K15397+K15397+K15397+K15397+K15397+K15397+…
Cellular Processes	Transport and catabolism	Endocytosis	696	ko04144	BnaA02g36050D;BnaA03g19370D;BnaA03g30260D;BnaA03g30270D;BnaA04g02850D;BnaA04g02860D;BnaA04g02880D;BnaA05g02070D;BnaA05g28620D;BnaA06g06710D;BnaA07g17060D;BnaA07g17070D;BnaA08g21050D;BnaA09g14090D;BnaA09g36300D;BnaA09g40500D;BnaA09g47830D;BnaA10g00480D;BnaC01g39540D;BnaC02g24660D;BnaC03g23210D;BnaC03g35580D;BnaC03g35590D;BnaC04g01710D;BnaC04g24700D;BnaC04g24720D;BnaC04g24730D;BnaC05g00540D;BnaC05g…	K00889+K00889+K00889+K00889+K00889+K00889+K00889+K00889+K00889+K00889+K00889+K00889+K00889+K00889+K00889+K00889+K00889+K00889+K00889+K00889+K00889+K00889+K00889+K00889+K00889+K00889+K00889+K00889+K00889+K00889+K00889+K00889+K00889+K00889+K00889+K00889+K00889+K00889+K00889+K01115+K01115+K01115+K01115+K01115+K01115+K01115+K01115+K01115+K01115+K01115+K01115+K01115+K01115+K01115+K01115+K01115+K01115+…
Metabolism	Biosynthesis of other secondary metabolites	Phenylpropanoid biosynthesis	659	ko00940	BnaA01g09810D;BnaA03g14000D;BnaA03g14010D;BnaA03g36130D;BnaA03g36140D;BnaA03g36160D;BnaA04g17560D;BnaA04g17570D;BnaA05g11950D;BnaA05g15310D;BnaA05g19760D;BnaA05g19770D;BnaA05g19780D;BnaA05g36600D;BnaA07g25210D;BnaA09g10680D;BnaA09g19890D;BnaA09g19900D;BnaC01g11510D;BnaC03g16950D;BnaC03g16960D;BnaC03g42000D;BnaC03g42020D;BnaC03g74270D;BnaC04g14330D;BnaC04g41120D;BnaC04g41130D;BnaC05g30940D;BnaC05g…	K01904+K00487+K00487+K01904+K01904+K01904+K00487+K00487+K00487+K01904+K01904+K01904+K01904+K01904+K01904+K01904+K01904+K01904+K01904+K00487+K00487+K01904+K01904+K01904+K00487+K00487+K00487+K01904+K01904+K01904+K01904+K01904+K01904+K01904+K01904+K01904+K01904+K01904+K01904+K00588+K00588+K00588+K00588+K00588+K10775+K10775+K10775+K10775+K10775+K10775+K10775+K00588+K00588+K00588+K10775+K00588+K10775+…
Genetic Information Processing	Translation	RNA transport	651	ko03013	BnaA02g03360D;BnaA02g06610D;BnaA02g09190D;BnaA03g06340D;BnaA03g20110D;BnaA03g56000D;BnaA04g06250D;BnaA05g03220D;BnaA05g32360D;BnaA07g25560D;BnaA10g09430D;BnaA10g17560D;BnaA10g29620D;BnaC01g39630D;BnaC02g06980D;BnaC02g13240D;BnaC03g08140D;BnaC03g08180D;BnaC03g09880D;BnaC04g02780D;BnaC04g29050D;BnaC04g49920D;BnaC06g27360D;BnaC09g31730D;BnaC09g35310D;BnaC09g40920D;BnaCnng06240D;BnaCnng18340D;BnaCnng…	K14290+K03539+K07936+K14290+K03538+K07936+K01164+K03538+K14290+K07562+K07936+K14290+K03539+K07562+K14290+K07936+K14290+K14290+K07936+K03538+K01164+K14290+K07562+K07936+K03539+K14290+K14290+K14290+K14290+K07936+K03538+K14290+K14307+K13126+K14304+K12875+K14305+K03260+K03260+K03260+K03259+K18213+K10577+K12160+K03113+K13126+K13025+K14301+K03257+K03248+K03248+K03754+K14289+K12878+K03259+K14319+K03241+…
Genetic Information Processing	Replication and repair	Nucleotide excision repair	614	ko03420	BnaA02g23030D;BnaA03g22490D;BnaA04g24310D;BnaA05g15640D;BnaA05g20400D;BnaA06g04450D;BnaA06g04690D;BnaA06g05740D;BnaA06g23100D;BnaA07g13230D;BnaA07g34290D;BnaA08g29300D;BnaA08g29310D;BnaA09g54770D;BnaC03g47130D;BnaC03g47260D;BnaC03g50300D;BnaC04g16850D;BnaC04g48110D;BnaC04g52480D;BnaC05g05650D;BnaC05g05920D;BnaC05g07290D;BnaC05g26940D;BnaC05g32360D;BnaC06g39050D;BnaUnng02250D;BnaA01g18010D;BnaA02g…	K02328+K02325+K02328+K02335+K02335+K03506+K02324+K03505+K02327+K02326+K03504+K02328+K02328+K02328+K02326+K02325+K02327+K02326+K02328+K02328+K03506+K02324+K03505+K02335+K02335+K03504+K02328+K03144+K03141+K06634+K10842+K10843+K10845+K03143+K06634+K02202+K03141+K02202+K10842+K03143+K02202+K10845+K10844+K03142+K06634+K02202+K03144+K10842+K10845+K03143+K02202+K02202+K10843+K06634+K10844+K03142+K10844+…
Metabolism	Energy metabolism	Oxidative phosphorylation	597	ko00190	BnaA02g28880D;BnaA02g34680D;BnaA06g25230D;BnaA06g32140D;BnaA07g15090D;BnaA07g15100D;BnaA07g37420D;BnaA09g02000D;BnaA09g02010D;BnaA09g50440D;BnaA09g52600D;BnaA10g22460D;BnaAnng04660D;BnaAnng38880D;BnaC02g00790D;BnaC02g43560D;BnaC02g43980D;BnaC03g48410D;BnaC06g13120D;BnaC06g13130D;BnaC07g16540D;BnaC07g24280D;BnaC09g01430D;BnaC09g01440D;BnaC09g07770D;BnaC09g07800D;BnaC09g47030D;BnaCnng16210D;BnaCnng…	K00235+K00234+K00234+K00235+K00235+K00235+K00234+K00235+K00235+K00235+K00234+K00236+K00235+K00234+K00236+K00235+K00234+K00234+K00235+K00235+K00234+K00235+K00235+K00235+K00234+K00234+K00236+K00235+K00234+K03965+K02144+K03661+K00417+K02109+K02154+K01535+K02140+K02152+K02152+K02153+K02267+K02265+K02135+K03966+K02260+K03950+K03950+K02111+K02109+K02110+K02108+K05579+K05579+K05572+K05580+K02112+K02265+…
Genetic Information Processing	Replication and repair	DNA replication	577	ko03030	BnaA02g13060D;BnaA02g13280D;BnaA02g23030D;BnaA02g26730D;BnaA03g22490D;BnaA04g11460D;BnaA04g24310D;BnaA05g15640D;BnaA05g20400D;BnaA06g04450D;BnaA06g04690D;BnaA06g05740D;BnaA06g23100D;BnaA07g12120D;BnaA07g12130D;BnaA07g13230D;BnaA07g15540D;BnaA07g25090D;BnaA07g34290D;BnaA08g29300D;BnaA08g29310D;BnaA09g54770D;BnaA10g06620D;BnaC02g17390D;BnaC02g17430D;BnaC02g17440D;BnaC02g34940D;BnaC02g45630D;BnaC03g…	K02685+K02321+K02328+K02320+K02325+K02684+K02328+K02335+K02335+K03506+K02324+K03505+K02327+K02320+K02320+K02326+K02684+K02685+K03504+K02328+K02328+K02328+K02685+K02321+K02321+K02321+K02320+K02685+K02326+K02325+K02327+K02326+K02320+K02328+K02328+K03506+K02324+K03505+K02335+K02335+K02684+K03504+K02320+K02320+K02684+K02684+K02328+K07466+K10740+K10744+K07466+K07466+K07466+K07466+K07466+K03111+K07466+…
Genetic Information Processing	Replication and repair	Homologous recombination	572	ko03440	BnaA02g23030D;BnaA04g24310D;BnaA05g15640D;BnaA05g20400D;BnaA06g05740D;BnaA06g23100D;BnaA07g34290D;BnaA08g29300D;BnaA08g29310D;BnaA09g54770D;BnaC03g50300D;BnaC04g48110D;BnaC04g52480D;BnaC05g07290D;BnaC05g26940D;BnaC05g32360D;BnaC06g39050D;BnaUnng02250D;BnaA01g08450D;BnaA01g09390D;BnaA01g17820D;BnaA01g22550D;BnaA01g25430D;BnaA01g25440D;BnaA01g25450D;BnaA01g26670D;BnaA01g27080D;BnaA01g30010D;BnaA01g…	K02328+K02328+K02335+K02335+K03505+K02327+K03504+K02328+K02328+K02328+K02327+K02328+K02328+K03505+K02335+K02335+K03504+K02328+K07466+K10740+K07466+K07466+K07466+K07466+K07466+K03111+K07466+K07466+K07466+K07466+K07466+K07466+K07466+K07466+K07466+K07466+K07466+K07466+K07466+K07466+K07466+K07466+K07466+K07466+K07466+K07466+K07466+K07466+K07466+K07466+K07466+K07466+K07466+K07466+K07466+K07466+K07466+…
Genetic Information Processing	Replication and repair	Mismatch repair	529	ko03430	BnaA02g23030D;BnaA04g24310D;BnaA06g05740D;BnaA06g23100D;BnaA07g34290D;BnaA08g29300D;BnaA08g29310D;BnaA09g54770D;BnaC03g50300D;BnaC04g48110D;BnaC04g52480D;BnaC05g07290D;BnaC06g39050D;BnaUnng02250D;BnaA01g08450D;BnaA01g09390D;BnaA01g17820D;BnaA01g22550D;BnaA01g25430D;BnaA01g25440D;BnaA01g25450D;BnaA01g26670D;BnaA01g27080D;BnaA01g30010D;BnaA01g35750D;BnaA02g01480D;BnaA02g03670D;BnaA02g05420D;BnaA02g…	K02328+K02328+K03505+K02327+K03504+K02328+K02328+K02328+K02327+K02328+K02328+K03505+K03504+K02328+K07466+K10740+K07466+K07466+K07466+K07466+K07466+K03111+K07466+K07466+K07466+K07466+K07466+K10754+K07466+K07466+K10756+K07466+K07466+K07466+K07466+K07466+K07466+K07466+K07466+K07466+K10756+K07466+K07466+K07466+K07466+K07466+K07466+K07466+K07466+K07466+K07466+K07466+K07466+K07466+K07466+K07466+K07466+…
Genetic Information Processing	Folding, sorting and degradation	Ubiquitin mediated proteolysis	525	ko04120	BnaA01g13200D;BnaA04g02190D;BnaA04g27280D;BnaA07g17510D;BnaAnng34240D;BnaC01g24100D;BnaC04g21410D;BnaC04g23980D;BnaC05g27450D;BnaC06g16140D;BnaC08g28860D;BnaA04g19370D;BnaA05g10230D;BnaA08g27940D;BnaA10g02640D;BnaC04g11150D;BnaC04g43700D;BnaC05g02620D;BnaC08g00740D;BnaCnng17410D;BnaA02g04940D;BnaA02g07480D;BnaA02g24350D;BnaA03g56030D;BnaA06g36120D;BnaA08g09840D;BnaA08g18740D;BnaA09g17890D;BnaA09g…	K10577+K10577+K10577+K10577+K10577+K10577+K10577+K10577+K10577+K10577+K10577+K10599+K10599+K10599+K10599+K10599+K10599+K10599+K10599+K10599+K03868+K10140+K10609+K03868+K10609+K10610+K10570+K10609+K10570+K03868+K10610+K10610+K10140+K10609+K10609+K10609+K03868+K10610+K10610+K10610+K10570+K10609+K10609+K10609+K03868+K10610+K10610+K10610+K10609+K10688+K03363+K03351+K03364+K10684+K04506+K10578+K06688+…
Genetic Information Processing	Translation	mRNA surveillance pathway	522	ko03015	BnaA01g03050D;BnaA01g05690D;BnaA01g19310D;BnaA01g25900D;BnaA02g06620D;BnaA02g15520D;BnaA02g15600D;BnaA02g24890D;BnaA03g18500D;BnaA03g35410D;BnaA03g38370D;BnaA03g54780D;BnaA03g56850D;BnaA03g57630D;BnaA03g57640D;BnaA04g05670D;BnaA04g08240D;BnaA04g13600D;BnaA05g04990D;BnaA05g12710D;BnaA05g15240D;BnaA05g20690D;BnaA05g20820D;BnaA05g22230D;BnaA05g36790D;BnaA05g36900D;BnaA06g02320D;BnaA06g03080D;BnaA06g…	K13126+K12875+K13126+K13025+K12881+K13126+K13126+K14326+K14327+K13025+K12882+K12881+K14324+K13126+K13126+K13126+K12881+K13126+K14324+K13171+K12876+K14328+K13126+K13126+K13025+K13126+K12876+K13126+K14294+K13114+K14325+K12883+K13126+K13126+K12881+K13126+K12876+K14328+K12881+K13126+K12875+K13126+K14325+K14294+K13126+K14328+K13126+K13126+K13126+K14294+K13126+K14294+K14325+K12877+K12881+K12881+K13025+…
Metabolism	Carbohydrate metabolism	Amino sugar and nucleotide sugar metabolism	503	ko00520	BnaA01g00240D;BnaA01g13990D;BnaA03g46830D;BnaA03g55140D;BnaA05g15840D;BnaA05g19110D;BnaA06g02800D;BnaA07g00920D;BnaA08g02130D;BnaA08g15820D;BnaA08g20600D;BnaA09g10080D;BnaA09g16190D;BnaA09g30060D;BnaA10g05030D;BnaA10g07730D;BnaC01g01180D;BnaC01g16480D;BnaC01g19570D;BnaC01g21580D;BnaC03g61220D;BnaC03g68660D;BnaC05g18490D;BnaC05g26650D;BnaC05g32490D;BnaC06g01220D;BnaC06g03640D;BnaC06g03650D;BnaC07g…	K00844+K01810+K01810+K01835+K00844+K00844+K00844+K00844+K00844+K00844+K01835+K00844+K01810+K01835+K00844+K01835+K00844+K01810+K01835+K00844+K00844+K00844+K01835+K00844+K00844+K00844+K00844+K00844+K00844+K00844+K01810+K01835+K01835+K01810+K00844+K00844+K01810+K01810+K01835+K00844+K00963+K00012+K00012+K00963+K16190+K00963+K00012+K00012+K00963+K00012+K00012+K00012+K12447+K00012+K16190+K16190+K16190+…
Metabolism	Carbohydrate metabolism	Starch and sucrose metabolism	493	ko00500	BnaA01g00240D;BnaA01g13990D;BnaA03g46830D;BnaA03g55140D;BnaA05g15840D;BnaA05g19110D;BnaA06g02800D;BnaA07g00920D;BnaA08g02130D;BnaA08g15820D;BnaA08g20600D;BnaA09g10080D;BnaA09g16190D;BnaA09g30060D;BnaA10g05030D;BnaA10g07730D;BnaC01g01180D;BnaC01g16480D;BnaC01g19570D;BnaC01g21580D;BnaC03g61220D;BnaC03g68660D;BnaC05g18490D;BnaC05g26650D;BnaC05g32490D;BnaC06g01220D;BnaC06g03640D;BnaC06g03650D;BnaC07g…	K00844+K01810+K01810+K01835+K00844+K00844+K00844+K00844+K00844+K00844+K01835+K00844+K01810+K01835+K00844+K01835+K00844+K01810+K01835+K00844+K00844+K00844+K01835+K00844+K00844+K00844+K00844+K00844+K00844+K00844+K01810+K01835+K01835+K01810+K00844+K00844+K01810+K01810+K01835+K00844+K00963+K00963+K00963+K00963+K00963+K00963+K00963+K00963+K00963+K00847+K00847+K00847+K00847+K00847+K00847+K00847+K00847+…
Metabolism	Carbohydrate metabolism	Glycolysis / Gluconeogenesis	470	ko00010	BnaA01g00210D;BnaA01g00240D;BnaA01g01360D;BnaA01g02880D;BnaA01g04110D;BnaA01g07610D;BnaA01g11910D;BnaA01g13390D;BnaA01g13990D;BnaA01g15080D;BnaA01g15090D;BnaA01g15420D;BnaA01g15640D;BnaA01g17630D;BnaA01g17800D;BnaA01g20680D;BnaA01g21340D;BnaA01g22040D;BnaA01g24280D;BnaA01g27130D;BnaA01g30320D;BnaA01g33660D;BnaA01g37380D;BnaA01g37400D;BnaA02g05770D;BnaA02g08190D;BnaA02g08550D;BnaA02g11520D;BnaA02g…	K01610+K00844+K00128+K00128+K00850+K00850+K00121+K01792+K01810+K01792+K01792+K00850+K01623+K00382+K00016+K00873+K15634+K00161+K00873+K01785+K00927+K00134+K01568+K00873+K15634+K01792+K00850+K00162+K01834+K00927+K15634+K01623+K00001+K00873+K01792+K01785+K01785+K01792+K00850+K00873+K00162+K01689+K01785+K00873+K00134+K00927+K00627+K00382+K00873+K00850+K15634+K00382+K00016+K01792+K01810+K00128+K00873+…
Genetic Information Processing	Folding, sorting and degradation	RNA degradation	460	ko03018	BnaA01g04110D;BnaA01g07610D;BnaA01g15420D;BnaA02g08550D;BnaA03g10690D;BnaA03g16750D;BnaA03g40360D;BnaA05g07770D;BnaA05g12480D;BnaA05g34310D;BnaA06g03380D;BnaA06g35220D;BnaA07g17450D;BnaA07g31190D;BnaA08g16020D;BnaA09g33310D;BnaA09g42580D;BnaA10g10800D;BnaAnng21140D;BnaAnng29210D;BnaAnng30290D;BnaAnng33900D;BnaAnng40390D;BnaC01g05570D;BnaC01g09280D;BnaC01g18320D;BnaC01g38430D;BnaC02g12110D;BnaC02g…	K00850+K00850+K00850+K00850+K00850+K01689+K00850+K01689+K01689+K01689+K00850+K00850+K01689+K01689+K00850+K01689+K00850+K00850+K01689+K00850+K01689+K00850+K00850+K00850+K00850+K00850+K01689+K00850+K01689+K00850+K00850+K01689+K00850+K00850+K01689+K01689+K01689+K01689+K01689+K00850+K00850+K01689+K00850+K00850+K00850+K00850+K00850+K00962+K00962+K00962+K00962+K00962+K00962+K00962+K00962+K00962+K00962+…
Metabolism	Amino acid metabolism	Cysteine and methionine metabolism	437	ko00270	BnaA01g17800D;BnaA03g43000D;BnaC01g21080D;BnaC07g34250D;BnaA02g00100D;BnaA04g13230D;BnaA05g14590D;BnaA06g01050D;BnaA06g07900D;BnaA06g07910D;BnaA06g08600D;BnaA06g20580D;BnaA06g38600D;BnaA08g01250D;BnaA08g27880D;BnaA09g16400D;BnaA10g02560D;BnaA10g10850D;BnaA10g22420D;BnaC02g00740D;BnaC03g27850D;BnaC03g53580D;BnaC03g65500D;BnaC03g78200D;BnaC04g35330D;BnaC05g02530D;BnaC05g09330D;BnaC06g06220D;BnaC07g…	K00016+K00016+K00016+K00016+K00026+K00026+K00026+K00026+K00026+K00026+K00025+K00026+K00026+K00026+K00025+K00025+K00025+K00025+K00026+K00026+K00026+K00026+K00026+K00026+K00026+K00025+K00026+K00026+K00026+K00026+K00025+K00025+K00026+K00026+K00026+K00026+K00025+K00815+K00815+K00815+K00815+K00815+K00815+K00815+K00815+K00815+K00815+K00815+K00815+K00815+K00815+K00815+K00815+K00815+K00815+K00815+K00815+…
Environmental Information Processing	Signal transduction	MAPK signaling pathway - plant	433	ko04016	BnaA01g13520D;BnaA02g21890D;BnaA03g38830D;BnaA06g22660D;BnaA08g00390D;BnaA09g17360D;BnaA09g22160D;BnaC01g15740D;BnaC02g28980D;BnaC03g51050D;BnaC03g70690D;BnaC09g26080D;BnaC09g51980D;BnaCnng15800D;BnaCnng73880D;BnaA09g21860D;BnaA09g39260D;BnaA10g00470D;BnaC05g00530D;BnaC08g49010D;BnaC09g24050D;BnaA03g53180D;BnaA06g14510D;BnaA06g14520D;BnaA07g11360D;BnaA07g11370D;BnaA08g10870D;BnaA08g21730D;BnaAnng…	K00940+K00940+K00940+K00940+K00940+K00940+K00940+K00940+K00940+K00940+K00940+K00940+K00940+K00940+K00940+K20772+K20772+K20772+K20772+K20772+K20772+K03781+K03781+K03781+K03781+K03781+K03781+K03781+K03781+K03781+K03781+K03781+K03781+K03781+K03781+K03781+K03781+K03781+K03781+K20547+K20547+K20547+K20547+K20547+K20547+K20547+K20547+K20547+K20547+K20547+K20547+K20547+K02183+K02183+K02183+K02183+K02183+…
Cellular Processes	Transport and catabolism	Phagosome	370	ko04145	BnaA01g02950D;BnaA01g04510D;BnaA01g05300D;BnaA01g13370D;BnaA01g15120D;BnaA01g15850D;BnaA02g09150D;BnaA02g21820D;BnaA02g29360D;BnaA03g11480D;BnaA03g22140D;BnaA03g22150D;BnaA03g24530D;BnaA03g26090D;BnaA03g27500D;BnaA03g47680D;BnaA03g48260D;BnaA03g50930D;BnaA03g52040D;BnaA03g52110D;BnaA03g58730D;BnaA04g01850D;BnaA04g07340D;BnaA04g12160D;BnaA04g16460D;BnaA05g33890D;BnaA06g07880D;BnaA06g14330D;BnaA07g…	K02144+K03661+K02154+K02152+K02152+K02153+K02153+K02150+K02146+K02153+K02154+K02154+K02150+K02151+K02152+K02152+K02153+K02144+K02155+K03661+K02152+K02149+K02154+K02154+K02154+K02152+K02148+K02147+K02150+K02147+K02147+K02154+K02149+K02147+K02145+K02145+K02144+K03661+K02153+K02154+K02147+K02148+K02152+K02151+K02146+K02150+K02150+K02150+K02154+K02148+K02149+K02146+K02154+K02154+K02154+K02144+K03661+…
Metabolism	Lipid metabolism	Glycerophospholipid metabolism	362	ko00564	BnaA03g01150D;BnaA07g17190D;BnaA10g26130D;BnaAnng00900D;BnaC02g02780D;BnaC03g01520D;BnaC03g01530D;BnaCnng07580D;BnaCnng10420D;BnaA01g14090D;BnaC01g16590D;BnaA01g02170D;BnaA01g06700D;BnaA01g27390D;BnaA01g32210D;BnaA02g17090D;BnaA02g17170D;BnaA02g33890D;BnaA03g02290D;BnaA03g10150D;BnaA03g49040D;BnaA03g50320D;BnaA03g51660D;BnaA03g57310D;BnaA04g02290D;BnaA05g06580D;BnaA05g15450D;BnaA05g16330D;BnaA05g…	K14674+K14674+K14674+K14674+K14674+K14674+K14674+K14674+K14674+K01517+K01517+K13506+K00901+K00901+K15728+K13513+K13513+K00901+K00901+K00901+K00901+K00655+K00901+K13508+K13523+K13508+K13523+K00630+K13513+K13508+K13508+K13508+K15728+K13519+K13513+K00901+K15728+K00901+K13523+K13513+K00630+K00901+K13523+K13508+K00901+K00901+K13519+K15728+K00630+K13523+K00901+K13508+K13508+K13508+K13508+K13506+K13508+…
Metabolism	Metabolism of other amino acids	Glutathione metabolism	361	ko00480	BnaA02g12320D;BnaA03g04970D;BnaA07g17800D;BnaA07g25510D;BnaAnng08060D;BnaAnng25840D;BnaAnng25850D;BnaC02g24620D;BnaC03g06570D;BnaC06g16500D;BnaC06g27300D;BnaCnng36970D;BnaA01g33010D;BnaA03g04190D;BnaA04g11280D;BnaA05g33580D;BnaA06g32220D;BnaA07g08970D;BnaA07g15160D;BnaA07g15420D;BnaA08g26430D;BnaA08g30000D;BnaA08g31100D;BnaA09g01980D;BnaA09g11470D;BnaA09g11480D;BnaA10g20180D;BnaAnng27690D;BnaC01g…	K00031+K00031+K00031+K00031+K00031+K00031+K00031+K00031+K00031+K00031+K00031+K00031+K00033+K00036+K00033+K00033+K00036+K00036+K00036+K00033+K00036+K00036+K00036+K00036+K00033+K00033+K00036+K00036+K00033+K00036+K00033+K00036+K00036+K00036+K00033+K00036+K00033+K00036+K00036+K00033+K00036+K00036+K00434+K00434+K00434+K00434+K00434+K00434+K00434+K00434+K00434+K00434+K00434+K00434+K00434+K00434+K00434+…
Genetic Information Processing	Translation	Ribosome biogenesis in eukaryotes	359	ko03008	BnaA03g08950D;BnaA10g13190D;BnaC03g11200D;BnaC09g35680D;BnaA01g08530D;BnaA01g12190D;BnaA01g14860D;BnaA01g16980D;BnaA01g17590D;BnaA01g17600D;BnaA01g18480D;BnaA01g19000D;BnaA01g19540D;BnaA01g21040D;BnaA01g21150D;BnaA01g30310D;BnaA01g32490D;BnaA01g33870D;BnaA02g00910D;BnaA02g02770D;BnaA02g03250D;BnaA02g03360D;BnaA02g04000D;BnaA02g06610D;BnaA02g09190D;BnaA02g10840D;BnaA02g12870D;BnaA02g12880D;BnaA02g…	K18532+K18532+K18532+K18532+K03115+K12845+K14563+K14557+K14536+K14536+K14556+K03097+K07179+K03097+K14570+K06943+K14538+K11128+K14546+K14560+K14555+K14290+K11128+K03539+K07936+K14563+K14572+K14572+K12619+K12845+K11131+K03115+K14564+K14570+K14567+K14549+K11129+K03264+K14560+K14290+K11128+K12845+K14571+K03538+K03115+K14558+K14548+K12845+K14554+K14571+K14550+K14538+K14564+K14536+K14571+K07179+K03115+…
Metabolism	Carbohydrate metabolism	Pentose and glucuronate interconversions	357	ko00040	BnaA03g40170D;BnaA09g10900D;BnaA10g23990D;BnaAnng38360D;BnaC09g48610D;BnaCnng14770D;BnaCnng43240D;BnaA01g03620D;BnaA01g11890D;BnaA01g14130D;BnaA01g20160D;BnaA01g29470D;BnaA01g31480D;BnaA01g32580D;BnaA01g34430D;BnaA01g37070D;BnaA01g37080D;BnaA01g37100D;BnaA02g02490D;BnaA02g02640D;BnaA02g03420D;BnaA02g04440D;BnaA02g08880D;BnaA02g08960D;BnaA02g12200D;BnaA02g13340D;BnaA02g19160D;BnaA02g26540D;BnaA02g…	K01783+K01783+K01783+K01783+K01783+K01783+K01783+K01051+K01728+K01728+K01051+K01051+K01051+K01051+K00963+K01051+K01051+K01051+K01728+K00012+K01184+K01051+K01728+K01051+K01184+K01728+K01728+K01728+K01728+K01051+K01728+K01051+K01805+K01805+K01728+K01051+K01728+K00012+K00963+K00008+K01051+K01051+K01051+K16190+K01728+K00963+K01051+K01051+K01728+K01728+K01728+K01051+K01184+K01728+K01728+K01728+K01184+…
Metabolism	Nucleotide metabolism	Purine metabolism	348	ko00230	BnaA01g20680D;BnaA01g24280D;BnaA01g37400D;BnaA03g02560D;BnaA03g10910D;BnaA03g28460D;BnaA03g36910D;BnaA03g52820D;BnaA03g55140D;BnaA04g05070D;BnaA04g06960D;BnaA05g35800D;BnaA05g37390D;BnaA06g22820D;BnaA07g15940D;BnaA08g20600D;BnaA09g30060D;BnaA09g33340D;BnaA09g36270D;BnaA09g52300D;BnaA09g52310D;BnaA10g00550D;BnaA10g06350D;BnaA10g07730D;BnaA10g10590D;BnaA10g22870D;BnaAnng32070D;BnaC01g19570D;BnaC01g…	K00873+K00873+K00873+K00873+K00873+K00873+K00873+K00873+K01835+K00873+K00873+K00873+K00873+K00873+K00873+K01835+K01835+K00873+K00873+K00873+K00873+K00873+K00873+K01835+K00873+K00873+K00873+K01835+K00873+K00873+K00873+K00873+K00873+K00873+K00873+K00873+K00873+K00873+K00873+K00873+K00873+K00873+K00873+K01835+K00873+K00873+K00873+K01835+K01835+K00873+K00873+K00873+K00873+K00873+K00873+K00873+K00873+…
Cellular Processes	Transport and catabolism	Peroxisome	346	ko04146	BnaA02g12320D;BnaA03g04970D;BnaA07g17800D;BnaA07g25510D;BnaAnng08060D;BnaAnng25840D;BnaAnng25850D;BnaC02g24620D;BnaC03g06570D;BnaC06g16500D;BnaC06g27300D;BnaCnng36970D;BnaA01g13470D;BnaA01g23830D;BnaA02g13270D;BnaA02g21860D;BnaA03g29320D;BnaA03g57590D;BnaA03g57930D;BnaA04g06290D;BnaA04g26960D;BnaA05g00630D;BnaA05g00640D;BnaA05g16170D;BnaA05g31340D;BnaA06g28680D;BnaA07g20920D;BnaA09g22150D;BnaA10g…	K00031+K00031+K00031+K00031+K00031+K00031+K00031+K00031+K00031+K00031+K00031+K00031+K01897+K01897+K01897+K01897+K01897+K01897+K01897+K01897+K01897+K01897+K01897+K01897+K01897+K01897+K01897+K01897+K01897+K01897+K01897+K01897+K01897+K01897+K01897+K01897+K01897+K01897+K01897+K01897+K01897+K01897+K01897+K01897+K01897+K01897+K01897+K01897+K01897+K01897+K01897+K01897+K01897+K01897+K01897+K01897+K00232+…
Metabolism	Carbohydrate metabolism	Pyruvate metabolism	344	ko00620	BnaA01g00210D;BnaA01g01360D;BnaA01g02880D;BnaA01g17630D;BnaA01g17800D;BnaA01g20680D;BnaA01g22040D;BnaA01g24280D;BnaA01g37400D;BnaA02g11520D;BnaA03g02560D;BnaA03g10910D;BnaA03g13490D;BnaA03g28460D;BnaA03g33170D;BnaA03g34340D;BnaA03g36910D;BnaA03g42400D;BnaA03g43000D;BnaA03g50730D;BnaA03g52820D;BnaA03g54330D;BnaA03g54560D;BnaA03g59170D;BnaA04g05070D;BnaA04g05600D;BnaA04g05610D;BnaA04g06960D;BnaA04g…	K01610+K00128+K00128+K00382+K00016+K00873+K00161+K00873+K00873+K00162+K00873+K00873+K00162+K00873+K00627+K00382+K00873+K00382+K00016+K00128+K00873+K01610+K00161+K00128+K00873+K00627+K00627+K00873+K01895+K01895+K00382+K00627+K00873+K00873+K00627+K14085+K00382+K00128+K00128+K00873+K01610+K01610+K00627+K00128+K00161+K00873+K00161+K14085+K00128+K00128+K00162+K00162+K00128+K00627+K00162+K00161+K00128+…
Metabolism	Carbohydrate metabolism	Glyoxylate and dicarboxylate metabolism	324	ko00630	BnaA01g17630D;BnaA03g34340D;BnaA03g42400D;BnaA04g12320D;BnaA04g12330D;BnaA05g22860D;BnaA06g04090D;BnaC01g21970D;BnaC03g39780D;BnaC04g33330D;BnaC05g36150D;BnaC05g36200D;BnaC06g01550D;BnaC07g33500D;BnaA01g01700D;BnaA02g00100D;BnaA03g20770D;BnaA03g38100D;BnaA04g01390D;BnaA04g01830D;BnaA04g01840D;BnaA04g13230D;BnaA04g25660D;BnaA05g03040D;BnaA05g03050D;BnaA05g03080D;BnaA05g14590D;BnaA06g01050D;BnaA06g…	K00382+K00382+K00382+K01895+K01895+K00382+K00382+K00382+K00382+K01895+K00382+K00382+K00382+K00382+K01681+K00026+K01647+K01681+K01647+K01647+K01647+K00026+K01647+K01647+K01647+K01647+K00026+K00026+K01681+K00026+K00026+K00025+K00026+K00026+K01647+K01647+K00026+K01681+K01681+K00025+K00025+K01647+K01647+K01647+K00025+K00025+K00026+K01681+K01647+K01681+K01681+K00026+K01647+K00026+K00026+K01681+K00026+…
Environmental Information Processing	Signal transduction	Phosphatidylinositol signaling system	310	ko04070	BnaA01g05350D;BnaA03g28170D;BnaA05g33260D;BnaA08g16710D;BnaC01g00210D;BnaC03g33220D;BnaC03g60380D;BnaCnng06030D;BnaA01g06700D;BnaA01g27390D;BnaA02g33890D;BnaA03g02290D;BnaA03g10150D;BnaA03g49040D;BnaA03g51660D;BnaA06g22880D;BnaA07g01550D;BnaA08g13870D;BnaA09g09730D;BnaA09g10340D;BnaA09g43530D;BnaAnng06320D;BnaC01g08060D;BnaC02g01400D;BnaC02g11340D;BnaC02g42690D;BnaC02g42700D;BnaC03g03330D;BnaC03g…	K18649+K10047+K10047+K18649+K18649+K10047+K18649+K10047+K00901+K00901+K00901+K00901+K00901+K00901+K00901+K00901+K00901+K00901+K00901+K00901+K00901+K00901+K00901+K00901+K00901+K00901+K00901+K00901+K00901+K00901+K00901+K00901+K00901+K00901+K00901+K00901+K00901+K00901+K00901+K00901+K00913+K00921+K01110+K18081+K00921+K05857+K05857+K00999+K00921+K15422+K19801+K00889+K00913+K05857+K00889+K00889+K00889+…
Metabolism	Global and overview maps	2-Oxocarboxylic acid metabolism	307	ko01210	BnaA01g01700D;BnaA01g02160D;BnaA01g03940D;BnaA02g12320D;BnaA02g19240D;BnaA03g00820D;BnaA03g04970D;BnaA03g20770D;BnaA03g38100D;BnaA04g01390D;BnaA04g01830D;BnaA04g01840D;BnaA04g25660D;BnaA05g03040D;BnaA05g03050D;BnaA05g03080D;BnaA05g28730D;BnaA05g28740D;BnaA06g07200D;BnaA07g03150D;BnaA07g08220D;BnaA07g17800D;BnaA07g18040D;BnaA07g25510D;BnaA08g10700D;BnaA08g14220D;BnaA08g14870D;BnaA08g14920D;BnaA08g…	K01681+K00030+K00030+K00031+K00030+K00030+K00031+K01647+K01681+K01647+K01647+K01647+K01647+K01647+K01647+K01647+K00030+K00030+K01681+K00030+K01647+K00031+K01647+K00031+K00030+K01681+K01681+K00030+K00030+K01647+K01647+K01647+K00030+K00031+K01681+K01647+K00030+K01681+K00031+K00031+K01681+K00030+K00030+K00031+K00030+K00031+K01647+K00030+K01681+K00030+K01681+K01681+K01681+K01647+K01647+K01647+K01647+…
Metabolism	Amino acid metabolism	Glycine, serine and threonine metabolism	295	ko00260	BnaA01g17630D;BnaA01g21340D;BnaA02g05770D;BnaA02g18710D;BnaA02g24710D;BnaA03g34340D;BnaA03g40860D;BnaA03g42400D;BnaA05g22860D;BnaA05g29640D;BnaA06g01320D;BnaA06g04090D;BnaA07g33900D;BnaA08g00900D;BnaA08g26140D;BnaA10g26070D;BnaAnng00920D;BnaAnng14300D;BnaC01g21970D;BnaC02g02760D;BnaC02g24750D;BnaC02g32750D;BnaC03g39780D;BnaC03g78230D;BnaC04g41780D;BnaC04g56920D;BnaC05g36150D;BnaC05g36200D;BnaC05g…	K00382+K15634+K15634+K01834+K15634+K00382+K15634+K00382+K00382+K15633+K14085+K00382+K01834+K14085+K15633+K15634+K15634+K01834+K00382+K15634+K01834+K15634+K00382+K14085+K15633+K15634+K00382+K00382+K15633+K00382+K14085+K01834+K01834+K01834+K15634+K00382+K15634+K15633+K15634+K15634+K15634+K14272+K14272+K14272+K14272+K14272+K14272+K14272+K14272+K14272+K14272+K14272+K00827+K00827+K00827+K00830+K00827+…
Metabolism	Energy metabolism	Carbon fixation in photosynthetic organisms	292	ko00710	BnaA01g00210D;BnaA01g15640D;BnaA01g30320D;BnaA01g33660D;BnaA02g19260D;BnaA02g27140D;BnaA03g28480D;BnaA03g32440D;BnaA03g54330D;BnaA04g03580D;BnaA04g03590D;BnaA04g04350D;BnaA04g05120D;BnaA04g12000D;BnaA04g12130D;BnaA05g10520D;BnaA05g33200D;BnaA06g08510D;BnaA06g10900D;BnaA06g24600D;BnaA06g24610D;BnaA06g37230D;BnaA07g15900D;BnaA07g20290D;BnaA07g20300D;BnaA07g34980D;BnaA07g37840D;BnaA08g16820D;BnaA08g…	K01610+K01623+K00927+K00134+K00927+K01623+K00134+K00927+K01610+K01803+K01803+K03841+K01623+K01803+K01623+K03841+K00134+K00134+K00134+K01610+K01610+K01623+K01623+K00927+K00134+K00927+K01803+K01623+K00134+K03841+K01623+K01803+K01803+K00134+K01610+K01623+K03841+K03841+K03841+K01623+K01623+K01623+K01610+K00134+K03841+K00927+K00134+K00134+K01623+K01610+K00927+K03841+K03841+K03841+K00134+K00927+K03841+…
Genetic Information Processing	Translation	Aminoacyl-tRNA biosynthesis	267	ko00970	BnaA04g06620D;BnaA09g34980D;BnaAnng08940D;BnaC01g41740D;BnaC04g29310D;BnaC08g08850D;BnaC08g26210D;BnaA07g25900D;BnaC06g27510D;BnaA01g15800D;BnaA02g31710D;BnaA06g23200D;BnaA06g39480D;BnaA09g04160D;BnaC01g18870D;BnaC02g40340D;BnaC03g50160D;BnaC09g03560D;BnaA01g03230D;BnaA01g06010D;BnaA01g07840D;BnaA01g15450D;BnaA01g17760D;BnaA01g25830D;BnaA01g32910D;BnaA01g33370D;BnaA01g33520D;BnaA02g05940D;BnaA02g…	K01874+K01874+K01874+K01874+K01874+K01874+K01874+K00604+K00604+K01885+K01885+K01885+K01885+K01885+K01885+K01885+K01885+K01885+K01876+K01876+K01876+K01887+K01893+K01893+K01892+K01867+K01867+K01872+K01881+K02433+K01870+K01875+K01893+K01883+K01867+K01869+K01869+K01866+K01892+K01867+K01893+K04567+K04567+K02434+K01868+K01870+K01870+K01887+K01876+K01890+K02435+K01890+K01893+K01883+K01881+K01870+K01889+…
Metabolism	Global and overview maps	Fatty acid metabolism	265	ko01212	BnaA01g13470D;BnaA01g23830D;BnaA01g32860D;BnaA01g33740D;BnaA01g33760D;BnaA01g33800D;BnaA02g00390D;BnaA02g13270D;BnaA02g17050D;BnaA02g21860D;BnaA02g24400D;BnaA03g02830D;BnaA03g05470D;BnaA03g06000D;BnaA03g13780D;BnaA03g17570D;BnaA03g20420D;BnaA03g28050D;BnaA03g29320D;BnaA03g37760D;BnaA03g38220D;BnaA03g57590D;BnaA03g57930D;BnaA04g06290D;BnaA04g07030D;BnaA04g07040D;BnaA04g12710D;BnaA04g17370D;BnaA04g…	K01897+K01897+K03921+K00059+K00059+K00059+K02372+K01897+K09458+K01897+K09458+K02372+K02160+K02160+K00645+K01962+K03921+K03921+K01897+K09458+K00208+K01897+K01897+K01897+K00059+K00059+K02372+K00645+K01897+K01897+K01897+K03921+K01962+K00645+K01897+K01897+K03921+K00059+K11262+K10781+K01961+K09458+K01897+K09458+K00208+K00059+K01897+K09458+K09458+K11262+K00059+K10781+K00648+K00648+K09458+K01897+K00059+…
Metabolism	Carbohydrate metabolism	Citrate cycle (TCA cycle)	257	ko00020	BnaA01g00210D;BnaA01g17630D;BnaA01g22040D;BnaA02g11520D;BnaA03g13490D;BnaA03g33170D;BnaA03g34340D;BnaA03g42400D;BnaA03g54330D;BnaA03g54560D;BnaA04g05600D;BnaA04g05610D;BnaA05g22860D;BnaA05g25500D;BnaA06g00560D;BnaA06g04090D;BnaA06g24600D;BnaA06g24610D;BnaA06g33300D;BnaA07g09080D;BnaA07g28560D;BnaA08g17560D;BnaA08g17570D;BnaA09g19620D;BnaA09g26420D;BnaA09g29700D;BnaA09g51510D;BnaA10g00730D;BnaA10g…	K01610+K00382+K00161+K00162+K00162+K00627+K00382+K00382+K01610+K00161+K00627+K00627+K00382+K00627+K00627+K00382+K01610+K01610+K00627+K00161+K00161+K00162+K00162+K00627+K00162+K00161+K00161+K00161+K00162+K00627+K01610+K01610+K00382+K00161+K00162+K01610+K00162+K00627+K00382+K00162+K00627+K00162+K00162+K00162+K00161+K00161+K00382+K00382+K00382+K00627+K00627+K00627+K00161+K00161+K00627+K00382+K01610+…
Metabolism	Carbohydrate metabolism	Fructose and mannose metabolism	253	ko00051	BnaA01g00240D;BnaA01g04110D;BnaA01g07610D;BnaA01g15420D;BnaA01g15640D;BnaA02g08550D;BnaA02g27140D;BnaA03g10690D;BnaA03g40360D;BnaA04g03580D;BnaA04g03590D;BnaA04g04350D;BnaA04g05120D;BnaA04g12000D;BnaA04g12130D;BnaA05g10520D;BnaA05g12130D;BnaA05g12140D;BnaA05g15840D;BnaA05g19110D;BnaA06g02800D;BnaA06g03380D;BnaA06g08370D;BnaA06g35220D;BnaA06g37230D;BnaA06g38560D;BnaA07g00920D;BnaA07g15900D;BnaA07g…	K00844+K00850+K00850+K00850+K01623+K00850+K01623+K00850+K00850+K01803+K01803+K03841+K01623+K01803+K01623+K03841+K00895+K00895+K00844+K00844+K00844+K00850+K00895+K00850+K01623+K00895+K00844+K01623+K00895+K01803+K00844+K00844+K00850+K01623+K00895+K00895+K03841+K00844+K00895+K01623+K01803+K00850+K01803+K00844+K00850+K01623+K03841+K03841+K03841+K00850+K01623+K00850+K00850+K01623+K01623+K00844+K00850+…
Metabolism	Metabolism of other amino acids	Cyanoamino acid metabolism	253	ko00460	BnaA01g00170D;BnaA04g06460D;BnaA07g19490D;BnaA07g23560D;BnaA07g29260D;BnaA08g06130D;BnaA08g12180D;BnaA08g15890D;BnaA08g21010D;BnaAnng04180D;BnaAnng08840D;BnaAnng38990D;BnaC01g01090D;BnaC01g06000D;BnaC01g41450D;BnaC03g61150D;BnaC03g67280D;BnaC04g23960D;BnaC05g17330D;BnaC06g32430D;BnaC07g51260D;BnaC08g06530D;BnaC08g20110D;BnaCnng17010D;BnaCnng19300D;BnaCnng62500D;BnaA04g00700D;BnaA09g39180D;BnaAnng…	K00600+K00600+K00600+K00600+K00600+K00600+K00600+K00600+K00600+K00600+K00600+K00600+K00600+K00600+K00600+K00600+K00600+K00600+K00600+K00600+K00600+K00600+K00600+K00600+K00600+K00600+K13034+K13034+K13034+K13034+K13034+K01501+K01501+K01501+K01501+K01501+K01501+K18592+K18592+K18592+K18592+K18592+K18592+K18592+K18592+K18592+K18592+K18592+K18592+K18592+K18592+K18592+K18592+K18592+K18592+K18592+K18592+…
Genetic Information Processing	Folding, sorting and degradation	Proteasome	249	ko03050	BnaA01g05950D;BnaA01g07860D;BnaA01g08440D;BnaA01g08980D;BnaA01g14180D;BnaA01g18610D;BnaA01g18920D;BnaA01g24580D;BnaA01g24870D;BnaA02g00230D;BnaA02g04630D;BnaA02g07760D;BnaA02g11180D;BnaA02g13000D;BnaA02g17210D;BnaA02g17220D;BnaA02g18400D;BnaA02g19190D;BnaA02g20220D;BnaA02g23310D;BnaA02g23370D;BnaA02g28940D;BnaA02g32850D;BnaA03g01760D;BnaA03g07840D;BnaA03g09830D;BnaA03g15060D;BnaA03g22250D;BnaA03g…	K02738+K03062+K03028+K03033+K03037+K03033+K02734+K02734+K02728+K03035+K03066+K03063+K02728+K11599+K03064+K03064+K02735+K02726+K10881+K02725+K03064+K02739+K03030+K03038+K03066+K03063+K03032+K02737+K03065+K06699+K02730+K02731+K03037+K03028+K02738+K03035+K03062+K02736+K02732+K03064+K02727+K03032+K03061+K02729+K03061+K02734+K03065+K02734+K02728+K03061+K02737+K02735+K03028+K03030+K02739+K03064+K03029+…
Metabolism	Lipid metabolism	Glycerolipid metabolism	244	ko00561	BnaA01g01360D;BnaA01g02880D;BnaA03g50730D;BnaA03g59170D;BnaA06g01320D;BnaA06g16950D;BnaA06g20750D;BnaA07g05850D;BnaA08g00900D;BnaA08g04430D;BnaA08g15200D;BnaA08g20300D;BnaA09g29890D;BnaA09g53800D;BnaA10g08800D;BnaA10g08810D;BnaAnng30530D;BnaC01g02370D;BnaC01g04140D;BnaC03g53360D;BnaC03g61970D;BnaC03g78230D;BnaC05g18900D;BnaC05g25340D;BnaC05g26280D;BnaC06g06890D;BnaC07g46060D;BnaC08g05150D;BnaC08g…	K00128+K00128+K00128+K00128+K14085+K00128+K00128+K00128+K14085+K00128+K00128+K00128+K00128+K00128+K00128+K00128+K00128+K00128+K00128+K00128+K00128+K14085+K00128+K00128+K00128+K14085+K00128+K00128+K00128+K00128+K00128+K00128+K00011+K00011+K00011+K00011+K00863+K07407+K07407+K07407+K07407+K07407+K07407+K07407+K07407+K07407+K07407+K07407+K14674+K14674+K14674+K14674+K14674+K14674+K14674+K14674+K14674+…
Metabolism	Amino acid metabolism	Arginine and proline metabolism	243	ko00330	BnaA01g01360D;BnaA01g02880D;BnaA03g50730D;BnaA03g59170D;BnaA06g01320D;BnaA06g16950D;BnaA06g20750D;BnaA07g05850D;BnaA08g00900D;BnaA08g04430D;BnaA08g15200D;BnaA08g20300D;BnaA09g29890D;BnaA09g53800D;BnaA10g08800D;BnaA10g08810D;BnaAnng30530D;BnaC01g02370D;BnaC01g04140D;BnaC03g53360D;BnaC03g61970D;BnaC03g78230D;BnaC05g18900D;BnaC05g25340D;BnaC05g26280D;BnaC06g06890D;BnaC07g46060D;BnaC08g05150D;BnaC08g…	K00128+K00128+K00128+K00128+K14085+K00128+K00128+K00128+K14085+K00128+K00128+K00128+K00128+K00128+K00128+K00128+K00128+K00128+K00128+K00128+K00128+K14085+K00128+K00128+K00128+K14085+K00128+K00128+K00128+K00128+K00128+K00128+K00811+K14454+K14454+K01476+K00811+K14454+K14455+K14455+K13427+K14454+K14454+K14454+K00811+K14454+K14454+K14454+K01476+K14454+K14454+K14454+K14455+K14455+K00811+K00811+K14454+…
Metabolism	Carbohydrate metabolism	Inositol phosphate metabolism	241	ko00562	BnaA04g03580D;BnaA04g03590D;BnaA04g12000D;BnaA06g05800D;BnaA07g37840D;BnaA09g35020D;BnaA09g43380D;BnaA09g48290D;BnaC04g25470D;BnaC04g25490D;BnaC04g33690D;BnaC05g07350D;BnaC08g26250D;BnaC08g35990D;BnaC08g42510D;BnaA01g05350D;BnaA02g08540D;BnaA03g28170D;BnaA03g47910D;BnaA05g33260D;BnaA07g00980D;BnaA08g16710D;BnaA09g10050D;BnaAnng22250D;BnaC01g00210D;BnaC02g12100D;BnaC03g33220D;BnaC03g60380D;BnaC05g…	K01803+K01803+K01803+K03103+K01803+K01803+K01803+K03103+K01803+K01803+K01803+K03103+K01803+K01803+K03103+K18649+K00469+K10047+K00469+K10047+K00469+K18649+K00469+K00469+K18649+K00469+K10047+K18649+K00469+K00469+K00469+K00469+K00469+K10047+K00140+K00140+K00913+K00921+K01114+K01110+K18081+K01114+K01858+K00921+K01858+K05857+K05857+K00999+K00921+K15422+K19801+K00889+K00913+K05857+K00889+K00889+K00889+…
Metabolism	Energy metabolism	Photosynthesis	240	ko00195	BnaA01g04740D;BnaA01g34170D;BnaA01g34180D;BnaA01g34190D;BnaA01g34200D;BnaA01g34290D;BnaA02g21070D;BnaA03g24090D;BnaA03g25540D;BnaA06g09670D;BnaA07g10310D;BnaA08g23770D;BnaA09g20320D;BnaA09g23090D;BnaC01g06270D;BnaC01g27960D;BnaC03g28690D;BnaC03g29960D;BnaC04g03000D;BnaC04g03010D;BnaC05g37960D;BnaC07g13560D;BnaC08g16740D;BnaC09g14480D;BnaC09g22670D;BnaC09g25660D;BnaC09g27590D;BnaCnng66500D;BnaA01g…	K02109+K02111+K02109+K02110+K02108+K02112+K02115+K02113+K02115+K02109+K02113+K02115+K02115+K02113+K02109+K02112+K02113+K02115+K02112+K02112+K02112+K02113+K02115+K02110+K02115+K02113+K02112+K02113+K02693+K08903+K08901+K02639+K02716+K02639+K02695+K02723+K08906+K02701+K02716+K02641+K02639+K02636+K02716+K08903+K02717+K02699+K02639+K02721+K02689+K02717+K02721+K08905+K02695+K08901+K08905+K02695+K14332+…
Metabolism	Amino acid metabolism	Alanine, aspartate and glutamate metabolism	230	ko00250	BnaA01g04910D;BnaA01g14190D;BnaA01g26440D;BnaA01g33880D;BnaA02g03140D;BnaA02g04300D;BnaA02g12430D;BnaA03g02040D;BnaA03g03400D;BnaA03g34780D;BnaA03g46970D;BnaA03g51850D;BnaA03g54610D;BnaA04g07450D;BnaA04g08160D;BnaA04g28670D;BnaA05g11710D;BnaA05g22420D;BnaA05g37230D;BnaA06g02140D;BnaA06g03770D;BnaA06g11610D;BnaA07g10010D;BnaA07g10020D;BnaA07g23120D;BnaA08g01810D;BnaA08g20540D;BnaA08g23190D;BnaA08g…	K00811+K01940+K00262+K00261+K01915+K14454+K01915+K00261+K14454+K01915+K01940+K00811+K14454+K01915+K01915+K14455+K14455+K01915+K00261+K00262+K01915+K00814+K14272+K14272+K00814+K00262+K14272+K00814+K01915+K14454+K14454+K01940+K01915+K01915+K14272+K00814+K14454+K00261+K01915+K01755+K00261+K00261+K14272+K01915+K00811+K01940+K14272+K00261+K00261+K14454+K01915+K14454+K01940+K00261+K14454+K01755+K01915+…
Metabolism	Nucleotide metabolism	Pyrimidine metabolism	225	ko00240	BnaA01g07270D;BnaA01g13520D;BnaA01g18840D;BnaA01g33700D;BnaA02g21890D;BnaA02g28570D;BnaA03g07010D;BnaA03g18020D;BnaA03g38830D;BnaA03g52980D;BnaA05g37430D;BnaA06g09020D;BnaA06g09030D;BnaA06g22660D;BnaA06g32440D;BnaA06g33910D;BnaA07g06360D;BnaA07g22920D;BnaA07g30470D;BnaA08g00390D;BnaA08g05520D;BnaA08g13350D;BnaA08g16560D;BnaA09g16580D;BnaA09g17360D;BnaA09g22160D;BnaA09g23220D;BnaA09g45660D;BnaA10g…	K01513+K00940+K03787+K14641+K00940+K10808+K14641+K01081+K00940+K10808+K14641+K01510+K01510+K00940+K10808+K01510+K10808+K03787+K03787+K00940+K03787+K01513+K10807+K10808+K00940+K00940+K10808+K01510+K14641+K10807+K01513+K00940+K03787+K10808+K14641+K03787+K00940+K10808+K14641+K01081+K00940+K10808+K10808+K10807+K00940+K03787+K01510+K01510+K10808+K14641+K14641+K03787+K01510+K01510+K01510+K10808+K10807+…
Metabolism	Metabolism of terpenoids and polyketides	Terpenoid backbone biosynthesis	225	ko00900	BnaA02g30030D;BnaA06g30370D;BnaA09g02880D;BnaA09g18440D;BnaC02g38440D;BnaC02g38450D;BnaC07g26300D;BnaC09g02300D;BnaC09g20370D;BnaA02g21580D;BnaA09g21330D;BnaC09g23740D;BnaCnng23810D;BnaCnng45000D;BnaA01g35430D;BnaA03g36320D;BnaA03g41980D;BnaA10g21120D;BnaC01g22400D;BnaC03g42170D;BnaC07g33090D;BnaC09g45250D;BnaA07g31590D;BnaC02g22900D;BnaC06g35410D;BnaCnng49000D;BnaA01g01020D;BnaA01g01060D;BnaA01g…	K00626+K00626+K00626+K00626+K00626+K00626+K00626+K00626+K00626+K01641+K01641+K01641+K01641+K01641+K01662+K01662+K01662+K01662+K01662+K01662+K01662+K01662+K10960+K10960+K10960+K10960+K13789+K00587+K03527+K05955+K13789+K15889+K11778+K11778+K11778+K00787+K00991+K00869+K00587+K01823+K14066+K08658+K11778+K06013+K01823+K13789+K13789+K15891+K15892+K15892+K15892+K01597+K05954+K05954+K13789+K05955+K14066+…
Genetic Information Processing	Folding, sorting and degradation	Protein export	222	ko03060	BnaA01g00010D;BnaA01g06530D;BnaA01g11090D;BnaA01g14270D;BnaA01g25490D;BnaA01g28550D;BnaA02g11680D;BnaA02g20080D;BnaA02g27160D;BnaA02g31150D;BnaA02g33100D;BnaA02g33120D;BnaA03g01670D;BnaA03g03210D;BnaA03g08900D;BnaA03g13960D;BnaA03g14210D;BnaA03g15760D;BnaA03g17100D;BnaA03g20350D;BnaA03g20980D;BnaA03g21410D;BnaA03g23500D;BnaA03g25320D;BnaA03g26540D;BnaA03g30590D;BnaA03g35990D;BnaA03g44230D;BnaA03g…	K12946+K13431+K09540+K07342+K12275+K13280+K07342+K09540+K03118+K12948+K03107+K03217+K12272+K09647+K09481+K03100+K09490+K10956+K09490+K03104+K09481+K03217+K07342+K12947+K03070+K09540+K12275+K13280+K07342+K03106+K13431+K12947+K03217+K03217+K03100+K13280+K13280+K10956+K10956+K12947+K12947+K03104+K03104+K09481+K03110+K03104+K09481+K03110+K12947+K10956+K03106+K12275+K13280+K09648+K12948+K03217+K13280+…
Metabolism	Carbohydrate metabolism	Pentose phosphate pathway	220	ko00030	BnaA01g04110D;BnaA01g07610D;BnaA01g13990D;BnaA01g15420D;BnaA01g15640D;BnaA02g08550D;BnaA02g27140D;BnaA03g10690D;BnaA03g40360D;BnaA03g46830D;BnaA03g55140D;BnaA04g04350D;BnaA04g05120D;BnaA04g12130D;BnaA04g14220D;BnaA05g10520D;BnaA05g12130D;BnaA05g12140D;BnaA06g03380D;BnaA06g08370D;BnaA06g35220D;BnaA06g37230D;BnaA06g38560D;BnaA07g15900D;BnaA07g32860D;BnaA08g16020D;BnaA08g16820D;BnaA08g20600D;BnaA08g…	K00850+K00850+K01810+K00850+K01623+K00850+K01623+K00850+K00850+K01810+K01835+K03841+K01623+K01623+K00131+K03841+K00895+K00895+K00850+K00895+K00850+K01623+K00895+K01623+K00895+K00850+K01623+K01835+K00895+K00895+K03841+K01810+K01835+K00895+K01623+K00131+K00850+K01835+K00850+K01623+K03841+K03841+K03841+K00850+K01623+K00850+K00850+K01623+K01623+K00850+K00850+K01810+K00850+K01835+K03841+K00850+K00895+…
Metabolism	Amino acid metabolism	Tryptophan metabolism	209	ko00380	BnaA01g01360D;BnaA01g02880D;BnaA01g17630D;BnaA03g34340D;BnaA03g42400D;BnaA03g50730D;BnaA03g59170D;BnaA05g22860D;BnaA06g01320D;BnaA06g04090D;BnaA06g16950D;BnaA06g20750D;BnaA07g05850D;BnaA08g00900D;BnaA08g04430D;BnaA08g15200D;BnaA08g20300D;BnaA09g29890D;BnaA09g53800D;BnaA10g08800D;BnaA10g08810D;BnaAnng30530D;BnaC01g02370D;BnaC01g04140D;BnaC01g21970D;BnaC03g39780D;BnaC03g53360D;BnaC03g61970D;BnaC03g…	K00128+K00128+K00382+K00382+K00382+K00128+K00128+K00382+K14085+K00382+K00128+K00128+K00128+K14085+K00128+K00128+K00128+K00128+K00128+K00128+K00128+K00128+K00128+K00128+K00382+K00382+K00128+K00128+K14085+K00128+K00128+K00128+K00382+K00382+K00382+K14085+K00382+K00128+K00128+K00128+K00128+K00128+K00128+K00658+K00658+K00658+K00658+K00658+K00658+K00658+K00658+K00658+K00626+K00626+K00626+K00626+K00626+…
Metabolism	Carbohydrate metabolism	Galactose metabolism	201	ko00052	BnaA01g00240D;BnaA01g04110D;BnaA01g07610D;BnaA01g15420D;BnaA01g27130D;BnaA02g08550D;BnaA03g05240D;BnaA03g05250D;BnaA03g10690D;BnaA03g27550D;BnaA03g40360D;BnaA03g55140D;BnaA05g15840D;BnaA05g19110D;BnaA05g22280D;BnaA06g02800D;BnaA06g03380D;BnaA06g17140D;BnaA06g35220D;BnaA07g00920D;BnaA08g02130D;BnaA08g15820D;BnaA08g16020D;BnaA08g20600D;BnaA09g10080D;BnaA09g30060D;BnaA09g42580D;BnaA10g05030D;BnaA10g…	K00844+K00850+K00850+K00850+K01785+K00850+K01785+K01785+K00850+K01785+K00850+K01835+K00844+K00844+K01785+K00844+K00850+K01785+K00850+K00844+K00844+K00844+K00850+K01835+K00844+K01835+K00850+K00844+K01835+K00850+K01785+K00850+K00850+K00850+K00844+K00850+K00850+K00850+K01835+K01785+K00844+K01785+K00850+K00850+K01785+K01785+K00850+K01785+K01785+K00850+K01785+K00850+K00844+K00844+K01785+K01835+K01785+…
Metabolism	Amino acid metabolism	Phenylalanine, tyrosine and tryptophan biosynthesis	193	ko00400	BnaA01g08470D;BnaA01g13270D;BnaA01g13280D;BnaA02g09960D;BnaA03g22790D;BnaA03g46060D;BnaA03g46070D;BnaA03g46090D;BnaA03g49250D;BnaA05g12790D;BnaA08g10670D;BnaA08g10680D;BnaA09g21600D;BnaA09g41170D;BnaA09g43670D;BnaAnng31450D;BnaAnng35150D;BnaAnng37050D;BnaAnng37410D;BnaC01g10020D;BnaC01g10040D;BnaC01g15060D;BnaC02g13860D;BnaC03g26850D;BnaC03g65220D;BnaC03g65230D;BnaC03g65240D;BnaC06g11940D;BnaC07g…	K00815+K00815+K00815+K00815+K00815+K00815+K00815+K00815+K00815+K00815+K00815+K00815+K00815+K00815+K00815+K00815+K00815+K00815+K00815+K00815+K00815+K00815+K00815+K00815+K00815+K00815+K00815+K00815+K00815+K00815+K00815+K00815+K00815+K00815+K00815+K00811+K14454+K14454+K00811+K14454+K14455+K14455+K14454+K14454+K14454+K00811+K14454+K14454+K14454+K14454+K14454+K14454+K14455+K14455+K00811+K00811+K14454+…
Genetic Information Processing	Transcription	Basal transcription factors	188	ko03022	BnaA01g02790D;BnaA01g05110D;BnaA01g09950D;BnaA01g09960D;BnaA01g10490D;BnaA01g18010D;BnaA01g22270D;BnaA01g26290D;BnaA01g31990D;BnaA02g14670D;BnaA02g17270D;BnaA02g21830D;BnaA02g29860D;BnaA02g31220D;BnaA02g32180D;BnaA02g36640D;BnaA02g36700D;BnaA03g19530D;BnaA03g25250D;BnaA03g27760D;BnaA03g31150D;BnaA03g41700D;BnaA03g46710D;BnaA03g51060D;BnaA03g53510D;BnaA03g55430D;BnaA03g55450D;BnaA03g55460D;BnaA04g…	K14649+K03134+K03136+K03137+K03135+K03144+K03135+K03125+K03126+K03141+K03139+K03137+K03124+K06634+K03130+K03129+K03129+K03124+K03138+K14649+K03124+K03139+K03123+K10842+K03124+K03120+K03120+K03120+K03124+K10843+K03124+K03120+K03132+K03132+K03125+K03125+K10845+K03126+K03143+K03124+K06634+K03124+K03129+K03139+K02202+K03141+K03128+K03129+K02202+K03120+K03133+K03125+K03134+K10842+K03123+K03143+K02202+…
Metabolism	Amino acid metabolism	Valine, leucine and isoleucine degradation	185	ko00280	BnaA01g01360D;BnaA01g02880D;BnaA01g17630D;BnaA03g34340D;BnaA03g42400D;BnaA03g50730D;BnaA03g59170D;BnaA05g22860D;BnaA06g01320D;BnaA06g04090D;BnaA06g16950D;BnaA06g20750D;BnaA07g05850D;BnaA08g00900D;BnaA08g04430D;BnaA08g15200D;BnaA08g20300D;BnaA09g29890D;BnaA09g53800D;BnaA10g08800D;BnaA10g08810D;BnaAnng30530D;BnaC01g02370D;BnaC01g04140D;BnaC01g21970D;BnaC03g39780D;BnaC03g53360D;BnaC03g61970D;BnaC03g…	K00128+K00128+K00382+K00382+K00382+K00128+K00128+K00382+K14085+K00382+K00128+K00128+K00128+K14085+K00128+K00128+K00128+K00128+K00128+K00128+K00128+K00128+K00128+K00128+K00382+K00382+K00128+K00128+K14085+K00128+K00128+K00128+K00382+K00382+K00382+K14085+K00382+K00128+K00128+K00128+K00128+K00128+K00128+K00249+K00626+K07513+K07513+K07513+K07513+K00249+K00626+K07513+K00626+K00626+K00249+K07513+K00626+…
Metabolism	Lipid metabolism	Fatty acid biosynthesis	178	ko00061	BnaA01g13470D;BnaA01g23830D;BnaA01g32860D;BnaA01g33740D;BnaA01g33760D;BnaA01g33800D;BnaA02g00390D;BnaA02g13270D;BnaA02g17050D;BnaA02g21860D;BnaA02g24400D;BnaA03g02830D;BnaA03g05470D;BnaA03g06000D;BnaA03g13780D;BnaA03g17570D;BnaA03g20420D;BnaA03g28050D;BnaA03g29320D;BnaA03g37700D;BnaA03g37760D;BnaA03g38220D;BnaA03g47660D;BnaA03g57590D;BnaA03g57930D;BnaA04g06290D;BnaA04g07030D;BnaA04g07040D;BnaA04g…	K01897+K01897+K03921+K00059+K00059+K00059+K02372+K01897+K09458+K01897+K09458+K02372+K02160+K02160+K00645+K01962+K03921+K03921+K01897+K10782+K09458+K00208+K10782+K01897+K01897+K01897+K00059+K00059+K10782+K02372+K00645+K01897+K01897+K01897+K03921+K01962+K00645+K01897+K10782+K01897+K03921+K00059+K11262+K10781+K01961+K09458+K01897+K09458+K00208+K10782+K10782+K00059+K01897+K09458+K09458+K11262+K00059+…
Metabolism	Metabolism of cofactors and vitamins	Ubiquinone and other terpenoid-quinone biosynthesis	177	ko00130	BnaA01g01080D;BnaA01g08470D;BnaA01g09810D;BnaA01g13270D;BnaA01g13280D;BnaA01g13340D;BnaA01g22440D;BnaA02g07440D;BnaA02g08220D;BnaA02g09580D;BnaA02g09960D;BnaA02g11840D;BnaA02g14110D;BnaA02g20140D;BnaA02g20230D;BnaA02g26490D;BnaA03g10340D;BnaA03g11850D;BnaA03g14000D;BnaA03g14010D;BnaA03g22790D;BnaA03g32030D;BnaA03g32040D;BnaA03g36130D;BnaA03g36140D;BnaA03g36160D;BnaA03g46060D;BnaA03g46070D;BnaA03g…	K03809+K00815+K01904+K00815+K00815+K06125+K02548+K03809+K06127+K03809+K00815+K05928+K14759+K05928+K05928+K03809+K06127+K03809+K00487+K00487+K00815+K12501+K12501+K01904+K01904+K01904+K00815+K00815+K00815+K06125+K06125+K00815+K09834+K03809+K03809+K03809+K03809+K00487+K00487+K00591+K00487+K00815+K01904+K01904+K01904+K01904+K12501+K12501+K01904+K03809+K02552+K02552+K09833+K12502+K02552+K01904+K00815+…
Metabolism	Glycan biosynthesis and metabolism	N-Glycan biosynthesis	177	ko00510	BnaA01g09030D;BnaA01g11060D;BnaA01g36460D;BnaA01g36480D;BnaA02g02390D;BnaA02g04400D;BnaA02g16890D;BnaA02g19030D;BnaA02g25880D;BnaA02g34720D;BnaA03g04910D;BnaA03g05140D;BnaA03g05150D;BnaA03g07700D;BnaA03g18660D;BnaA03g36080D;BnaA03g36480D;BnaA03g38040D;BnaA03g43680D;BnaA03g54860D;BnaA03g58520D;BnaA04g03050D;BnaA04g08660D;BnaA04g27900D;BnaA05g00230D;BnaA05g02220D;BnaA05g04210D;BnaA05g10740D;BnaA05g…	K07441+K12667+K12669+K12669+K01231+K07151+K09658+K03843+K12666+K12670+K00737+K01231+K01231+K07151+K00729+K01230+K01001+K00736+K07441+K03850+K12667+K01001+K03848+K03848+K03845+K01001+K03849+K00902+K12668+K07151+K07151+K01230+K00737+K03844+K00729+K01230+K00737+K03846+K00721+K05546+K05546+K00737+K12666+K03842+K00726+K01228+K00721+K12670+K12666+K01228+K09658+K12666+K03843+K00737+K01230+K09659+K12668+…
Metabolism	Lipid metabolism	Fatty acid degradation	174	ko00071	BnaA01g01360D;BnaA01g02880D;BnaA01g11910D;BnaA02g32360D;BnaA03g50730D;BnaA03g59170D;BnaA05g17940D;BnaA06g01320D;BnaA06g07210D;BnaA06g16950D;BnaA06g20750D;BnaA06g36450D;BnaA07g05850D;BnaA07g10480D;BnaA07g21050D;BnaA07g33310D;BnaA08g00900D;BnaA08g04430D;BnaA08g15200D;BnaA08g20300D;BnaA08g20830D;BnaA09g16810D;BnaA09g24180D;BnaA09g29890D;BnaA09g30650D;BnaA09g43000D;BnaA09g53800D;BnaA10g08800D;BnaA10g…	K00128+K00128+K00121+K00001+K00128+K00128+K00001+K14085+K18857+K00128+K00128+K00121+K00128+K00121+K18857+K18857+K14085+K00128+K00128+K00128+K00121+K00121+K00001+K00128+K00121+K00001+K00128+K00128+K00128+K00121+K00128+K00121+K00128+K00128+K00121+K00001+K00128+K00128+K14085+K00121+K00128+K00001+K00128+K00128+K00001+K00001+K14085+K18857+K18857+K00121+K00121+K00128+K00128+K00121+K00128+K00001+K00121+…
Metabolism	Metabolism of other amino acids	beta-Alanine metabolism	174	ko00410	BnaA01g01360D;BnaA01g02880D;BnaA03g50730D;BnaA03g59170D;BnaA06g01320D;BnaA06g16950D;BnaA06g20750D;BnaA07g05850D;BnaA08g00900D;BnaA08g04430D;BnaA08g15200D;BnaA08g20300D;BnaA09g29890D;BnaA09g53800D;BnaA10g08800D;BnaA10g08810D;BnaAnng30530D;BnaC01g02370D;BnaC01g04140D;BnaC03g53360D;BnaC03g61970D;BnaC03g78230D;BnaC05g18900D;BnaC05g25340D;BnaC05g26280D;BnaC06g06890D;BnaC07g46060D;BnaC08g05150D;BnaC08g…	K00128+K00128+K00128+K00128+K14085+K00128+K00128+K00128+K14085+K00128+K00128+K00128+K00128+K00128+K00128+K00128+K00128+K00128+K00128+K00128+K00128+K14085+K00128+K00128+K00128+K14085+K00128+K00128+K00128+K00128+K00128+K00128+K00232+K00232+K00232+K00232+K00232+K00232+K00232+K00232+K00232+K00232+K00232+K00232+K00232+K00232+K00232+K00232+K00232+K00232+K00232+K00207+K00207+K00207+K01431+K01464+K01431+…
Metabolism	Metabolism of cofactors and vitamins	Porphyrin and chlorophyll metabolism	165	ko00860	BnaA02g28360D;BnaA04g25760D;BnaA05g04080D;BnaA06g25640D;BnaA10g10200D;BnaA10g10220D;BnaA10g10230D;BnaC02g12480D;BnaC04g03820D;BnaC04g49670D;BnaCnng32060D;BnaCnng32620D;BnaA01g00780D;BnaA01g09270D;BnaA01g14420D;BnaA01g15800D;BnaA01g16440D;BnaA01g19280D;BnaA01g20360D;BnaA01g35850D;BnaA02g18330D;BnaA02g24150D;BnaA02g31710D;BnaA03g01520D;BnaA03g02420D;BnaA03g04440D;BnaA03g25740D;BnaA03g30860D;BnaA03g…	K02259+K02257+K02257+K02259+K02259+K02259+K02259+K02259+K02257+K02257+K02259+K02259+K13545+K03405+K03428+K01885+K00218+K04040+K02492+K02492+K08099+K03405+K01885+K13606+K01749+K03403+K19054+K08101+K03428+K00218+K03405+K02492+K13606+K02492+K01599+K01599+K08101+K03404+K02492+K08099+K01845+K01885+K01599+K01885+K00510+K04035+K01698+K10960+K00218+K13544+K19054+K01885+K01845+K00510+K02492+K00510+K08099+…
Metabolism	Lipid metabolism	alpha-Linolenic acid metabolism	160	ko00592	BnaA06g07210D;BnaA07g21050D;BnaA07g33310D;BnaC06g21150D;BnaC06g37860D;BnaA01g07910D;BnaA01g18160D;BnaA01g32550D;BnaA02g30470D;BnaA03g15290D;BnaA03g16270D;BnaA03g29710D;BnaA04g05950D;BnaA04g19180D;BnaA05g10480D;BnaA05g30610D;BnaA06g11400D;BnaA06g24040D;BnaA08g28040D;BnaA08g30740D;BnaA09g07080D;BnaA09g32380D;BnaA10g28060D;BnaA10g28070D;BnaA10g28090D;BnaC01g09510D;BnaC02g18580D;BnaC02g38800D;BnaC03g…	K18857+K18857+K18857+K18857+K18857+K10527+K00232+K10527+K07513+K07513+K00232+K10527+K00232+K07513+K07513+K10527+K10527+K00232+K07513+K10527+K00232+K00232+K00232+K00232+K00232+K10527+K07513+K07513+K07513+K00232+K10527+K07513+K00232+K07513+K00232+K07513+K00232+K00232+K00232+K10527+K10527+K10527+K07513+K10527+K00232+K00232+K00232+K00232+K10527+K14674+K14674+K14674+K14674+K14674+K14674+K14674+K14674+…
Genetic Information Processing	Transcription	RNA polymerase	160	ko03020	BnaA01g01750D;BnaA01g11530D;BnaA01g14530D;BnaA01g17530D;BnaA01g22480D;BnaA01g34160D;BnaA01g34220D;BnaA01g34230D;BnaA01g36190D;BnaA01g37360D;BnaA02g00250D;BnaA02g06560D;BnaA02g07250D;BnaA02g20440D;BnaA02g23730D;BnaA02g23740D;BnaA02g27230D;BnaA02g30930D;BnaA03g07780D;BnaA03g08930D;BnaA03g09670D;BnaA03g09990D;BnaA03g36610D;BnaA03g41610D;BnaA03g44840D;BnaA03g50300D;BnaA04g02280D;BnaA04g04070D;BnaA04g…	K03006+K03010+K03026+K03017+K03027+K03046+K03046+K03043+K03007+K03005+K03012+K03018+K03015+K03024+K03021+K03021+K03012+K14721+K03013+K03019+K03015+K03013+K03013+K03008+K03010+K03015+K02999+K03013+K03008+K03013+K03020+K03020+K03009+K03013+K03013+K03009+K03007+K03000+K03023+K03040+K03025+K14721+K03012+K03011+K03024+K03002+K03002+K02999+K03009+K03010+K03010+K03007+K03022+K03014+K03025+K03011+K03017+…
Metabolism	Amino acid metabolism	Tyrosine metabolism	153	ko00350	BnaA01g11910D;BnaA02g32360D;BnaA05g17940D;BnaA06g07210D;BnaA06g36450D;BnaA07g10480D;BnaA07g21050D;BnaA07g33310D;BnaA08g20830D;BnaA09g16810D;BnaA09g24180D;BnaA09g30650D;BnaA09g43000D;BnaAnng05540D;BnaAnng36660D;BnaC01g13540D;BnaC02g41070D;BnaC05g17730D;BnaC05g24910D;BnaC05g28370D;BnaC05g28380D;BnaC06g21150D;BnaC06g37860D;BnaC07g13740D;BnaC07g17470D;BnaC08g05970D;BnaC08g49310D;BnaC09g17760D;BnaCnng…	K00121+K00001+K00001+K18857+K00121+K00121+K18857+K18857+K00121+K00121+K00001+K00121+K00001+K00121+K00121+K00121+K00001+K00121+K00001+K00001+K00001+K18857+K18857+K00121+K00121+K00121+K00001+K00121+K00121+K00815+K00815+K00815+K00815+K00815+K00815+K00815+K00815+K00815+K00815+K00815+K00815+K00815+K00815+K00815+K00457+K00457+K00815+K00815+K00815+K00815+K00815+K00815+K00815+K00815+K00815+K00815+K00815+…
Genetic Information Processing	Folding, sorting and degradation	SNARE interactions in vesicular transport	152	ko04130	BnaA01g04780D;BnaA01g23010D;BnaA01g32080D;BnaA01g33910D;BnaA01g33920D;BnaA02g05590D;BnaA02g07810D;BnaA02g07910D;BnaA02g14320D;BnaA02g19290D;BnaA02g27060D;BnaA03g01750D;BnaA03g08500D;BnaA03g12680D;BnaA03g21120D;BnaA03g31960D;BnaA03g37300D;BnaA03g37320D;BnaA03g41770D;BnaA04g05470D;BnaA04g09380D;BnaA04g09440D;BnaA04g21140D;BnaA05g07500D;BnaA05g25020D;BnaA05g28800D;BnaA05g31560D;BnaA05g32710D;BnaA05g…	K08515+K08490+K08506+K08486+K08486+K08515+K08516+K08516+K08493+K08503+K08506+K08490+K08515+K08517+K08495+K08486+K08497+K08490+K08486+K08486+K08493+K08493+K08496+K08496+K08516+K08506+K08489+K08486+K08486+K08486+K08486+K08517+K08495+K08503+K08486+K08506+K08486+K08490+K08497+K08498+K08493+K08504+K08503+K08505+K08504+K08493+K08505+K08498+K08495+K08517+K08486+K08486+K08515+K08489+K08486+K08493+K08506+…
Metabolism	Energy metabolism	Nitrogen metabolism	149	ko00910	BnaA01g26440D;BnaA01g33880D;BnaA02g03140D;BnaA02g12430D;BnaA03g02040D;BnaA03g34780D;BnaA04g07450D;BnaA04g08160D;BnaA05g22420D;BnaA05g37230D;BnaA06g02140D;BnaA06g03770D;BnaA08g01810D;BnaA08g29950D;BnaA09g27570D;BnaA09g27970D;BnaA10g16660D;BnaA10g17910D;BnaA10g23880D;BnaAnng13720D;BnaAnng27730D;BnaC01g40390D;BnaC02g01610D;BnaC02g06690D;BnaC03g03050D;BnaC03g40250D;BnaC03g77940D;BnaC04g29670D;BnaC04g…	K00262+K00261+K01915+K01915+K00261+K01915+K01915+K01915+K01915+K00261+K00262+K01915+K00262+K01915+K01915+K01915+K00261+K01915+K00261+K00261+K01915+K00261+K00261+K01915+K00261+K01915+K00262+K01915+K01915+K00261+K01915+K01915+K00261+K00261+K01915+K00262+K01915+K00261+K00261+K01915+K00261+K01915+K01915+K00264+K00264+K00264+K01501+K01501+K01501+K01501+K01501+K01501+K01455+K01455+K01455+K01455+K00284+…
Metabolism	Carbohydrate metabolism	Ascorbate and aldarate metabolism	146	ko00053	BnaA01g01360D;BnaA01g02880D;BnaA03g50730D;BnaA03g59170D;BnaA06g01320D;BnaA06g16950D;BnaA06g20750D;BnaA07g05850D;BnaA08g00900D;BnaA08g04430D;BnaA08g15200D;BnaA08g20300D;BnaA09g29890D;BnaA09g53800D;BnaA10g08800D;BnaA10g08810D;BnaAnng30530D;BnaC01g02370D;BnaC01g04140D;BnaC03g53360D;BnaC03g61970D;BnaC03g78230D;BnaC05g18900D;BnaC05g25340D;BnaC05g26280D;BnaC06g06890D;BnaC07g46060D;BnaC08g05150D;BnaC08g…	K00128+K00128+K00128+K00128+K14085+K00128+K00128+K00128+K14085+K00128+K00128+K00128+K00128+K00128+K00128+K00128+K00128+K00128+K00128+K00128+K00128+K14085+K00128+K00128+K00128+K14085+K00128+K00128+K00128+K00128+K00128+K00128+K00012+K00012+K16190+K00012+K00012+K00012+K00012+K00012+K12447+K00012+K16190+K16190+K16190+K00012+K00012+K16190+K00012+K00012+K12447+K00012+K16190+K00434+K18649+K14190+K00434+…
Organismal Systems	Environmental adaptation	Circadian rhythm - plant	146	ko04712	BnaA02g30320D;BnaA02g30340D;BnaA03g04590D;BnaA10g19670D;BnaC02g05070D;BnaC02g37270D;BnaC02g37280D;BnaC02g38710D;BnaC02g38730D;BnaC03g06120D;BnaC09g43250D;BnaCnng01290D;BnaA01g08530D;BnaA01g19000D;BnaA01g21040D;BnaA02g24960D;BnaA03g20850D;BnaA03g43190D;BnaA04g10920D;BnaA04g13490D;BnaA05g04230D;BnaA06g07950D;BnaA09g38340D;BnaA09g42220D;BnaAnng03880D;BnaAnng38300D;BnaC01g10230D;BnaC01g42660D;BnaC02g…	K00660+K00660+K00660+K00660+K00660+K00660+K00660+K00660+K00660+K00660+K00660+K00660+K03115+K03097+K03097+K03115+K03115+K03115+K03115+K03097+K03115+K03097+K03115+K03097+K03097+K03097+K03115+K03097+K03115+K03115+K03115+K03115+K03115+K03097+K03097+K03115+K03115+K03115+K03115+K03097+K03097+K03097+K03115+K03097+K03097+K12126+K12126+K12126+K12126+K10143+K10143+K10143+K10143+K10143+K10143+K10143+K10143+…
Metabolism	Amino acid metabolism	Arginine biosynthesis	145	ko00220	BnaA01g00340D;BnaA01g04910D;BnaA01g08700D;BnaA01g14190D;BnaA01g26440D;BnaA01g33880D;BnaA02g03140D;BnaA02g04300D;BnaA02g12430D;BnaA02g13220D;BnaA02g19550D;BnaA02g35990D;BnaA02g36300D;BnaA03g02040D;BnaA03g03400D;BnaA03g23800D;BnaA03g34780D;BnaA03g43390D;BnaA03g46970D;BnaA03g51850D;BnaA03g54190D;BnaA03g54610D;BnaA03g56420D;BnaA04g02330D;BnaA04g07450D;BnaA04g08160D;BnaA04g21470D;BnaA04g28670D;BnaA05g…	K14682+K00811+K01438+K01940+K00262+K00261+K01915+K14454+K01915+K01427+K00818+K00611+K00818+K00261+K14454+K01476+K01915+K01438+K01940+K00811+K14682+K14454+K14677+K00930+K01915+K01915+K00620+K14455+K00620+K14455+K01915+K00261+K00262+K01915+K00814+K13427+K14677+K14272+K14272+K00611+K00814+K00818+K00262+K14272+K00814+K01915+K14454+K00145+K14454+K01940+K01915+K01915+K14272+K00930+K00814+K14677+K14454+…
Metabolism	Biosynthesis of other secondary metabolites	Tropane, piperidine and pyridine alkaloid biosynthesis	145	ko00960	BnaA01g08470D;BnaA01g13270D;BnaA01g13280D;BnaA02g09960D;BnaA03g22790D;BnaA03g46060D;BnaA03g46070D;BnaA03g46090D;BnaA03g49250D;BnaA05g12790D;BnaA08g10670D;BnaA08g10680D;BnaA09g21600D;BnaA09g41170D;BnaA09g43670D;BnaAnng31450D;BnaAnng35150D;BnaAnng37050D;BnaAnng37410D;BnaC01g10020D;BnaC01g10040D;BnaC01g15060D;BnaC02g13860D;BnaC03g26850D;BnaC03g65220D;BnaC03g65230D;BnaC03g65240D;BnaC06g11940D;BnaC07g…	K00815+K00815+K00815+K00815+K00815+K00815+K00815+K00815+K00815+K00815+K00815+K00815+K00815+K00815+K00815+K00815+K00815+K00815+K00815+K00815+K00815+K00815+K00815+K00815+K00815+K00815+K00815+K00815+K00815+K00815+K00815+K00815+K00815+K00815+K00815+K00811+K14454+K14454+K00811+K14454+K14455+K14455+K14454+K14454+K14454+K00811+K14454+K14454+K14454+K14454+K14454+K14454+K14455+K14455+K00811+K00811+K14454+…
Metabolism	Energy metabolism	Sulfur metabolism	136	ko00920	BnaA01g19120D;BnaA01g34620D;BnaA03g36860D;BnaA03g38670D;BnaA03g54400D;BnaA05g16830D;BnaA05g37220D;BnaA06g14140D;BnaA06g25000D;BnaA06g36560D;BnaA08g16110D;BnaA09g07320D;BnaA09g08410D;BnaC01g00790D;BnaC01g22950D;BnaC02g30510D;BnaC03g48570D;BnaC03g60800D;BnaC05g47640D;BnaC07g17320D;BnaC07g51290D;BnaC08g19100D;BnaC09g07220D;BnaC09g08710D;BnaCnng47170D;BnaCnng62800D;BnaCnng69640D;BnaA01g18880D;BnaA01g…	K13811+K00860+K13811+K00860+K00860+K13811+K00860+K13811+K00860+K13811+K00860+K00860+K00860+K00860+K13811+K13811+K00860+K00860+K00860+K13811+K00860+K13811+K00860+K00860+K00860+K13811+K13811+K01738+K01738+K01011+K00640+K01739+K01738+K13034+K01738+K01738+K01738+K00640+K01739+K00640+K00640+K01738+K01011+K00640+K01738+K01011+K01011+K00640+K01738+K01738+K13034+K00640+K01739+K01738+K01738+K01739+K01738+…
Metabolism	Lipid metabolism	Steroid biosynthesis	133	ko00100	BnaA01g00280D;BnaA01g02510D;BnaA01g02520D;BnaA01g12440D;BnaA01g12450D;BnaA01g25880D;BnaA02g21480D;BnaA02g32720D;BnaA02g37020D;BnaA02g37030D;BnaA03g01150D;BnaA03g23480D;BnaA03g28010D;BnaA03g28020D;BnaA03g28030D;BnaA03g38150D;BnaA03g52950D;BnaA03g52960D;BnaA04g05110D;BnaA04g06060D;BnaA04g13320D;BnaA04g20200D;BnaA04g20210D;BnaA04g28650D;BnaA05g03320D;BnaA05g09340D;BnaA05g15860D;BnaA05g19350D;BnaA05g…	K00511+K00801+K00801+K14423+K14423+K09828+K14423+K00511+K00511+K00511+K14674+K08246+K00227+K00227+K00227+K01853+K00801+K00801+K00222+K00511+K00511+K09832+K09832+K14424+K07748+K09832+K00213+K09828+K00227+K09828+K05917+K01824+K09828+K00511+K00511+K01853+K00222+K00222+K14674+K08242+K00213+K00801+K05917+K00511+K00511+K00559+K07748+K08246+K14424+K14424+K00511+K14424+K07748+K14674+K14674+K01824+K00227+…
Metabolism	Carbohydrate metabolism	Propanoate metabolism	133	ko00640	BnaA01g17630D;BnaA01g17800D;BnaA03g34340D;BnaA03g42400D;BnaA03g43000D;BnaA04g12320D;BnaA04g12330D;BnaA05g22860D;BnaA06g04090D;BnaC01g21080D;BnaC01g21970D;BnaC03g39780D;BnaC04g33330D;BnaC05g36150D;BnaC05g36200D;BnaC06g01550D;BnaC07g33500D;BnaC07g34250D;BnaA03g02450D;BnaA03g39510D;BnaA07g00290D;BnaA09g11210D;BnaA10g23060D;BnaAnng06200D;BnaC02g01230D;BnaC03g03460D;BnaC07g00480D;BnaC07g49680D;BnaC09g…	K00382+K00016+K00382+K00382+K00016+K01895+K01895+K00382+K00382+K00016+K00382+K00382+K01895+K00382+K00382+K00382+K00382+K00016+K01899+K01899+K01900+K01900+K01899+K01899+K01899+K01899+K01900+K01899+K01900+K01899+K02160+K02160+K01962+K01962+K11262+K01961+K11262+K01961+K01963+K02160+K02160+K11262+K02160+K01963+K02160+K02160+K01962+K01962+K01961+K02160+K01963+K11262+K11262+K01963+K01963+K02160+K01961+…
Metabolism	Lipid metabolism	Cutin, suberine and wax biosynthesis	131	ko00073	BnaA01g03200D;BnaA01g15860D;BnaA02g05700D;BnaA02g07380D;BnaA02g12120D;BnaA02g15090D;BnaA02g16200D;BnaA02g30970D;BnaA02g32980D;BnaA03g08520D;BnaA03g15390D;BnaA03g17370D;BnaA03g39540D;BnaA04g02700D;BnaA04g02710D;BnaA04g10770D;BnaA04g19410D;BnaA04g29140D;BnaA04g29150D;BnaA05g05240D;BnaA05g06830D;BnaA05g10200D;BnaA05g12980D;BnaA05g27080D;BnaA05g28270D;BnaA06g07590D;BnaA06g16340D;BnaA06g18840D;BnaA06g…	K13356+K17991+K13356+K15401+K15400+K17991+K15403+K17991+K15402+K13356+K17991+K15404+K15402+K13356+K13356+K15400+K17991+K15404+K15404+K15398+K15404+K17991+K15406+K13356+K15399+K15402+K15400+K13356+K13356+K15400+K15400+K17991+K15400+K13356+K13356+K15403+K17991+K15400+K15400+K17991+K13356+K15402+K15402+K15405+K15405+K15405+K15405+K15402+K15398+K15398+K17991+K13356+K13356+K13356+K15401+K15405+K15405+…
Genetic Information Processing	Replication and repair	Base excision repair	121	ko03410	BnaA02g23030D;BnaA03g22490D;BnaA04g24310D;BnaA05g15640D;BnaA05g20400D;BnaA06g04450D;BnaA06g04690D;BnaA06g05740D;BnaA06g23100D;BnaA07g13230D;BnaA07g34290D;BnaA08g29300D;BnaA08g29310D;BnaA09g54770D;BnaC03g47130D;BnaC03g47260D;BnaC03g50300D;BnaC04g16850D;BnaC04g48110D;BnaC04g52480D;BnaC05g05650D;BnaC05g05920D;BnaC05g07290D;BnaC05g26940D;BnaC05g32360D;BnaC06g39050D;BnaUnng02250D;BnaA05g12470D;BnaA06g…	K02328+K02325+K02328+K02335+K02335+K03506+K02324+K03505+K02327+K02326+K03504+K02328+K02328+K02328+K02326+K02325+K02327+K02326+K02328+K02328+K03506+K02324+K03505+K02335+K02335+K03504+K02328+K04802+K10747+K04799+K10747+K10747+K04802+K04799+K04802+K04802+K04802+K10747+K10747+K10747+K04799+K04802+K10747+K04802+K10772+K03648+K01246+K10803+K01246+K10798+K10569+K10773+K01142+K10798+K10802+K03575+K10798+…
Metabolism	Amino acid metabolism	Lysine degradation	120	ko00310	BnaA01g01360D;BnaA01g02880D;BnaA01g17630D;BnaA03g34340D;BnaA03g42400D;BnaA03g50730D;BnaA03g59170D;BnaA05g22860D;BnaA06g01320D;BnaA06g04090D;BnaA06g16950D;BnaA06g20750D;BnaA07g05850D;BnaA08g00900D;BnaA08g04430D;BnaA08g15200D;BnaA08g20300D;BnaA09g29890D;BnaA09g53800D;BnaA10g08800D;BnaA10g08810D;BnaAnng30530D;BnaC01g02370D;BnaC01g04140D;BnaC01g21970D;BnaC03g39780D;BnaC03g53360D;BnaC03g61970D;BnaC03g…	K00128+K00128+K00382+K00382+K00382+K00128+K00128+K00382+K14085+K00382+K00128+K00128+K00128+K14085+K00128+K00128+K00128+K00128+K00128+K00128+K00128+K00128+K00128+K00128+K00382+K00382+K00128+K00128+K14085+K00128+K00128+K00128+K00382+K00382+K00382+K14085+K00382+K00128+K00128+K00128+K00128+K00128+K00128+K00658+K00658+K00658+K00658+K00658+K00658+K00658+K00658+K00658+K00626+K00626+K00626+K00626+K00626+…
Metabolism	Lipid metabolism	Fatty acid elongation	119	ko00062	BnaA01g02870D;BnaA01g32810D;BnaA02g13310D;BnaA02g22340D;BnaA02g30560D;BnaA02g35570D;BnaA02g36400D;BnaA03g02950D;BnaA03g27090D;BnaA03g39010D;BnaA03g41660D;BnaA03g43090D;BnaA03g51030D;BnaA04g15380D;BnaA04g16560D;BnaA05g01150D;BnaA05g30890D;BnaA06g04280D;BnaA06g13570D;BnaA06g13650D;BnaA06g36580D;BnaA06g40130D;BnaA07g03590D;BnaA07g14020D;BnaA07g18630D;BnaA07g23630D;BnaA07g24600D;BnaA07g26670D;BnaA07g…	K15397+K10249+K10251+K15397+K15397+K15397+K01068+K10703+K01068+K15397+K15397+K01074+K15397+K15397+K15397+K15397+K10249+K15397+K15397+K15397+K15397+K01074+K15397+K15397+K01074+K15397+K15397+K10251+K10251+K01074+K15397+K15397+K15397+K15397+K15397+K01074+K10251+K15397+K10258+K15397+K15397+K15397+K01068+K15397+K15397+K10258+K10703+K15397+K15397+K15397+K15397+K15397+K01074+K01074+K10703+K07512+K07512+…
Cellular Processes	Transport and catabolism	Autophagy - other eukaryotes	118	ko04136	BnaA09g14140D;BnaC09g14690D;BnaCnng11620D;BnaCnng11640D;BnaCnng11650D;BnaUnng01690D;BnaA04g01980D;BnaA04g24540D;BnaA05g34330D;BnaA06g06220D;BnaA07g17860D;BnaA07g17880D;BnaA07g28500D;BnaA09g14410D;BnaA09g37450D;BnaA09g48180D;BnaC03g48230D;BnaC03g63160D;BnaC03g72670D;BnaC04g02330D;BnaC04g23560D;BnaC04g48370D;BnaC05g07970D;BnaC06g16610D;BnaC06g31070D;BnaC08g29250D;BnaC09g14970D;BnaC09g36480D;BnaCnng…	K00914+K00914+K00914+K00914+K00914+K00914+K04382+K04382+K04382+K04382+K04382+K04382+K04382+K04382+K04382+K04382+K04382+K04382+K04382+K04382+K04382+K04382+K04382+K04382+K04382+K04382+K04382+K04382+K04382+K04382+K08333+K08341+K08341+K08331+K08339+K08337+K08269+K08341+K08341+K08341+K08343+K08341+K08341+K08341+K08342+K08269+K08269+K08341+K08342+K08331+K08341+K08336+K17888+K08341+K08336+K08333+K08331+…
Metabolism	Amino acid metabolism	Phenylalanine metabolism	116	ko00360	BnaA01g08470D;BnaA01g13270D;BnaA01g13280D;BnaA02g09960D;BnaA03g22790D;BnaA03g46060D;BnaA03g46070D;BnaA03g46090D;BnaA03g49250D;BnaA05g12790D;BnaA08g10670D;BnaA08g10680D;BnaA09g21600D;BnaA09g41170D;BnaA09g43670D;BnaA09g49870D;BnaA10g04310D;BnaAnng31450D;BnaAnng35150D;BnaAnng37050D;BnaAnng37410D;BnaC01g10020D;BnaC01g10040D;BnaC01g15060D;BnaC02g13860D;BnaC03g26850D;BnaC03g65220D;BnaC03g65230D;BnaC03g…	K00815+K00815+K00815+K00815+K00815+K00815+K00815+K00815+K00815+K00815+K00815+K00815+K00815+K00815+K00815+K00457+K00457+K00815+K00815+K00815+K00815+K00815+K00815+K00815+K00815+K00815+K00815+K00815+K00815+K00457+K00815+K00815+K00815+K00815+K00815+K00815+K00815+K00457+K00815+K00811+K14454+K14454+K00811+K14454+K14455+K14455+K14454+K14454+K14454+K00811+K14454+K14454+K14454+K14454+K14454+K14454+K14455+…
Metabolism	Metabolism of cofactors and vitamins	Pantothenate and CoA biosynthesis	116	ko00770	BnaA01g07270D;BnaA08g13350D;BnaC01g08890D;BnaA01g27800D;BnaA03g34770D;BnaA05g22440D;BnaA09g06820D;BnaA10g20470D;BnaAnng15120D;BnaC01g34640D;BnaC03g40210D;BnaC03g40220D;BnaC03g49800D;BnaC05g35700D;BnaC09g06340D;BnaC09g44500D;BnaA01g20890D;BnaA02g12300D;BnaA03g35400D;BnaA05g36800D;BnaA06g15650D;BnaA06g24740D;BnaA06g37960D;BnaA06g37970D;BnaA08g02280D;BnaA08g02290D;BnaA08g26000D;BnaA08g26010D;BnaAnng…	K01513+K01513+K01513+K00207+K00207+K00207+K01431+K01464+K01431+K00207+K00207+K00207+K01431+K00207+K01431+K01464+K00826+K00826+K00826+K00826+K00826+K00826+K00826+K00826+K00826+K00826+K00826+K00826+K00826+K00826+K00826+K00826+K00826+K00826+K00826+K00826+K00826+K00826+K00826+K00826+K00826+K00826+K00826+K00826+K00826+K00826+K00826+K00826+K00826+K00826+K01652+K01687+K01653+K01653+K00053+K01653+K01652+…
Metabolism	Metabolism of terpenoids and polyketides	Carotenoid biosynthesis	115	ko00906	BnaA01g04140D;BnaA01g09090D;BnaA01g09900D;BnaA01g14940D;BnaA01g26060D;BnaA01g29390D;BnaA02g03450D;BnaA02g36880D;BnaA03g06450D;BnaA03g10470D;BnaA03g33390D;BnaA03g33400D;BnaA03g35180D;BnaA03g43960D;BnaA03g47590D;BnaA03g58230D;BnaA04g06150D;BnaA04g15640D;BnaA04g16900D;BnaA04g26000D;BnaA05g14890D;BnaA05g20890D;BnaA05g25030D;BnaA05g28540D;BnaA06g01540D;BnaA06g01590D;BnaA06g04940D;BnaA06g06650D;BnaA07g…	K17913+K09840+K09840+K15746+K06444+K09840+K02291+K06444+K02291+K06444+K09840+K09840+K09843+K09843+K15746+K09840+K02293+K09842+K09843+K17912+K15748+K09843+K09840+K06443+K15748+K09841+K09839+K15744+K06444+K09840+K09838+K09837+K09840+K09841+K15747+K09840+K02293+K02293+K09838+K09843+K15747+K09840+K09835+K17911+K09842+K06444+K02291+K15746+K09843+K00514+K09842+K06444+K06444+K09843+K15747+K17913+K17913+…
Metabolism	Glycan biosynthesis and metabolism	Various types of N-glycan biosynthesis	108	ko00513	BnaA01g09030D;BnaA01g11060D;BnaA01g36460D;BnaA01g36480D;BnaA02g02390D;BnaA02g04400D;BnaA02g19030D;BnaA02g25880D;BnaA02g34720D;BnaA03g05140D;BnaA03g05150D;BnaA03g07700D;BnaA03g36080D;BnaA03g38040D;BnaA03g43680D;BnaA03g58520D;BnaA05g00230D;BnaA05g16320D;BnaA05g18450D;BnaA05g18460D;BnaA05g19890D;BnaA05g34510D;BnaA06g02240D;BnaA06g11370D;BnaA06g34690D;BnaA06g38380D;BnaA06g40900D;BnaA07g12390D;BnaA07g…	K07441+K12667+K12669+K12669+K01231+K07151+K03843+K12666+K12670+K01231+K01231+K07151+K01230+K00736+K07441+K12667+K03845+K12668+K07151+K07151+K01230+K03844+K01230+K03846+K12666+K03842+K00726+K12670+K12666+K12666+K03843+K01230+K12668+K01230+K03846+K12669+K12670+K07151+K12668+K01230+K03842+K03847+K07151+K07432+K07441+K12667+K07432+K12669+K01231+K07151+K03843+K12668+K12666+K12668+K01231+K01231+K01231+…
Metabolism	Amino acid metabolism	Valine, leucine and isoleucine biosynthesis	103	ko00290	BnaA01g32000D;BnaA02g13500D;BnaA03g30400D;BnaA04g10490D;BnaAnng16560D;BnaC01g38880D;BnaC03g35770D;BnaC05g42980D;BnaC06g15510D;BnaC07g05850D;BnaC08g24730D;BnaA01g20890D;BnaA02g12300D;BnaA03g35400D;BnaA05g36800D;BnaA06g15650D;BnaA06g24740D;BnaA06g37960D;BnaA06g37970D;BnaA08g02280D;BnaA08g02290D;BnaA08g26000D;BnaA08g26010D;BnaAnng29280D;BnaAnng36960D;BnaC03g41100D;BnaC03g41160D;BnaC03g68440D;BnaC03g…	K01754+K01754+K01754+K01754+K01754+K01754+K01754+K01754+K01754+K01754+K01754+K00826+K00826+K00826+K00826+K00826+K00826+K00826+K00826+K00826+K00826+K00826+K00826+K00826+K00826+K00826+K00826+K00826+K00826+K00826+K00826+K00826+K00826+K00826+K00826+K00826+K00826+K00826+K00826+K00826+K00826+K00826+K00826+K00826+K00826+K01652+K01687+K00052+K01653+K00052+K00052+K00052+K01653+K01704+K00053+K01703+K01653+…
Metabolism	Biosynthesis of other secondary metabolites	Flavonoid biosynthesis	102	ko00941	BnaA03g14000D;BnaA03g14010D;BnaA04g17560D;BnaA04g17570D;BnaA05g11950D;BnaC03g16950D;BnaC03g16960D;BnaC04g14330D;BnaC04g41120D;BnaC04g41130D;BnaA01g15400D;BnaA01g15410D;BnaA02g13460D;BnaA02g13470D;BnaA03g50850D;BnaA07g26750D;BnaA08g11640D;BnaA08g19210D;BnaAnng06470D;BnaC01g18290D;BnaC01g18300D;BnaC02g17730D;BnaC03g77170D;BnaC03g77610D;BnaC06g15030D;BnaC06g29150D;BnaC07g10910D;BnaC07g44690D;BnaC08g…	K00487+K00487+K00487+K00487+K00487+K00487+K00487+K00487+K00487+K00487+K00588+K00588+K00588+K00588+K00588+K00588+K00588+K00588+K00588+K00588+K00588+K00588+K00588+K00588+K00588+K00588+K00588+K00588+K00588+K00588+K00588+K13065+K13065+K13065+K09754+K09754+K09754+K13065+K13065+K13065+K13065+K09754+K09754+K09754+K13065+K13065+K13065+K13065+K05277+K08695+K00660+K00660+K05278+K05278+K00660+K05277+K08695+…
Metabolism	Metabolism of terpenoids and polyketides	Diterpenoid biosynthesis	98	ko00904	BnaA01g11120D;BnaA01g24200D;BnaA01g35230D;BnaA02g11210D;BnaA02g18900D;BnaA02g19810D;BnaA02g19820D;BnaA02g31830D;BnaA03g15880D;BnaA03g26050D;BnaA03g47400D;BnaA03g55500D;BnaA03g57690D;BnaA03g60000D;BnaA04g20250D;BnaA05g09290D;BnaA05g10890D;BnaA05g15510D;BnaA05g17600D;BnaA06g10250D;BnaA06g21640D;BnaA06g27960D;BnaA07g07480D;BnaA07g34940D;BnaA07g35700D;BnaA07g35710D;BnaA07g39200D;BnaA07g39210D;BnaA08g…	K04125+K04123+K05282+K05282+K04125+K04124+K04124+K04122+K04125+K04120+K05282+K05282+K17961+K17982+K04125+K04125+K04123+K04125+K04125+K04124+K05282+K04122+K04125+K04121+K04124+K04124+K04125+K04125+K04124+K04125+K04125+K04125+K04120+K17982+K05282+K04125+K04124+K04125+K04123+K05282+K05282+K05282+K04120+K05282+K05282+K04125+K04125+K04125+K05282+K05282+K05282+K04124+K04124+K04123+K05282+K04125+K04125+…
Metabolism	Lipid metabolism	Ether lipid metabolism	95	ko00565	BnaA03g01150D;BnaA07g17190D;BnaA10g26130D;BnaAnng00900D;BnaC02g02780D;BnaC03g01520D;BnaC03g01530D;BnaCnng07580D;BnaCnng10420D;BnaA06g08020D;BnaA09g12940D;BnaC03g74130D;BnaC07g16260D;BnaCnng17620D;BnaCnng31560D;BnaCnng41640D;BnaCnng44390D;BnaA01g20420D;BnaA01g34350D;BnaA04g15510D;BnaA05g32880D;BnaA06g16410D;BnaA09g23040D;BnaA10g04680D;BnaAnng16500D;BnaC04g38510D;BnaC05g05030D;BnaC05g48190D;BnaC08g…	K14674+K14674+K14674+K14674+K14674+K14674+K14674+K14674+K14674+K13519+K13519+K13519+K13519+K13519+K13519+K13519+K13519+K01114+K01114+K01114+K01114+K01114+K01114+K01114+K01114+K01114+K01114+K01114+K01114+K01114+K01115+K01115+K01115+K00993+K01115+K01115+K01115+K01115+K01115+K13510+K13510+K01047+K01115+K01115+K01115+K01115+K00993+K16860+K01115+K00993+K13510+K13510+K01115+K01115+K00993+K01115+K01115+…
Metabolism	Biosynthesis of other secondary metabolites	Isoquinoline alkaloid biosynthesis	92	ko00950	BnaA01g08470D;BnaA01g13270D;BnaA01g13280D;BnaA02g09960D;BnaA03g22790D;BnaA03g46060D;BnaA03g46070D;BnaA03g46090D;BnaA03g49250D;BnaA05g12790D;BnaA08g10670D;BnaA08g10680D;BnaA09g21600D;BnaA09g41170D;BnaA09g43670D;BnaAnng31450D;BnaAnng35150D;BnaAnng37050D;BnaAnng37410D;BnaC01g10020D;BnaC01g10040D;BnaC01g15060D;BnaC02g13860D;BnaC03g26850D;BnaC03g65220D;BnaC03g65230D;BnaC03g65240D;BnaC06g11940D;BnaC07g…	K00815+K00815+K00815+K00815+K00815+K00815+K00815+K00815+K00815+K00815+K00815+K00815+K00815+K00815+K00815+K00815+K00815+K00815+K00815+K00815+K00815+K00815+K00815+K00815+K00815+K00815+K00815+K00815+K00815+K00815+K00815+K00815+K00815+K00815+K00815+K00811+K14454+K14454+K00811+K14454+K14455+K14455+K14454+K14454+K14454+K00811+K14454+K14454+K14454+K14454+K14454+K14454+K14455+K14455+K00811+K00811+K14454+…
Metabolism	Biosynthesis of other secondary metabolites	Glucosinolate biosynthesis	91	ko00966	BnaA01g20890D;BnaA02g12300D;BnaA03g35400D;BnaA05g36800D;BnaA06g15650D;BnaA06g24740D;BnaA06g37960D;BnaA06g37970D;BnaA08g02280D;BnaA08g02290D;BnaA08g26000D;BnaA08g26010D;BnaAnng29280D;BnaAnng36960D;BnaC03g41100D;BnaC03g41160D;BnaC03g68440D;BnaC03g68450D;BnaC03g68460D;BnaC05g07800D;BnaC05g07810D;BnaC05g33030D;BnaC06g03270D;BnaC08g09160D;BnaC08g13960D;BnaC08g13970D;BnaC08g48510D;BnaC09g24790D;BnaC09g…	K00826+K00826+K00826+K00826+K00826+K00826+K00826+K00826+K00826+K00826+K00826+K00826+K00826+K00826+K00826+K00826+K00826+K00826+K00826+K00826+K00826+K00826+K00826+K00826+K00826+K00826+K00826+K00826+K00826+K00826+K00826+K00826+K00826+K00826+K01703+K01703+K01703+K01703+K01703+K01703+K11812+K11813+K11821+K11818+K11812+K11819+K11820+K11821+K11819+K11812+K11821+K11812+K11820+K11821+K11812+K11818+K11819+…
Metabolism	Lipid metabolism	Sphingolipid metabolism	89	ko00600	BnaA03g02510D;BnaA04g04110D;BnaA04g05180D;BnaA04g05190D;BnaA07g22890D;BnaA09g35760D;BnaAnng06130D;BnaAnng06140D;BnaC02g01150D;BnaC02g01160D;BnaC03g03520D;BnaC03g03530D;BnaC04g26290D;BnaC04g26310D;BnaC04g27780D;BnaC06g12140D;BnaC06g23860D;BnaC06g23870D;BnaC08g27260D;BnaCnng62740D;BnaA01g23710D;BnaA02g23500D;BnaA03g23280D;BnaA07g06340D;BnaA09g23550D;BnaC01g30560D;BnaC01g40970D;BnaC02g29350D;BnaC03g…	K07407+K01190+K12309+K12309+K12309+K07407+K07407+K07407+K07407+K07407+K07407+K07407+K01190+K01190+K12309+K07407+K12309+K12309+K07407+K07407+K17108+K17108+K17108+K17108+K17108+K17108+K17108+K17108+K17108+K17108+K17108+K00654+K04711+K00654+K04713+K04710+K04715+K04718+K04711+K04708+K12349+K12349+K04708+K04713+K00654+K00654+K04713+K04713+K04718+K04711+K01634+K04710+K04710+K12349+K12349+K04708+K00654+…
Environmental Information Processing	Membrane transport	ABC transporters	88	ko02010	BnaA01g08290D;BnaA01g15130D;BnaA02g29270D;BnaA02g29470D;BnaA03g09840D;BnaA03g16880D;BnaA03g18640D;BnaA03g19570D;BnaA03g43560D;BnaA03g43600D;BnaA03g47690D;BnaA04g03700D;BnaA04g21150D;BnaA04g26870D;BnaA05g00840D;BnaA05g34640D;BnaA06g06550D;BnaA06g31250D;BnaA06g31530D;BnaA06g31540D;BnaA06g31550D;BnaA06g31580D;BnaA06g31590D;BnaA06g31620D;BnaA06g39710D;BnaA07g03040D;BnaA07g19210D;BnaA07g38050D;BnaA08g…	K05663+K05658+K05658+K05658+K05663+K05658+K05658+K05643+K05658+K05674+K05658+K05658+K05658+K05658+K05658+K05658+K05658+K05658+K05658+K05658+K05658+K05658+K05658+K05658+K05658+K05658+K05658+K05658+K05658+K05658+K05658+K05658+K05658+K05658+K05658+K05658+K05658+K05658+K05658+K05658+K05663+K05663+K05658+K05658+K05658+K05658+K05663+K05658+K05658+K05643+K05658+K05658+K05658+K05658+K05658+K05658+K05658+…
Metabolism	Amino acid metabolism	Histidine metabolism	83	ko00340	BnaA01g01360D;BnaA01g02880D;BnaA03g50730D;BnaA03g59170D;BnaA06g01320D;BnaA06g16950D;BnaA06g20750D;BnaA07g05850D;BnaA08g00900D;BnaA08g04430D;BnaA08g15200D;BnaA08g20300D;BnaA09g29890D;BnaA09g53800D;BnaA10g08800D;BnaA10g08810D;BnaAnng30530D;BnaC01g02370D;BnaC01g04140D;BnaC03g53360D;BnaC03g61970D;BnaC03g78230D;BnaC05g18900D;BnaC05g25340D;BnaC05g26280D;BnaC06g06890D;BnaC07g46060D;BnaC08g05150D;BnaC08g…	K00128+K00128+K00128+K00128+K14085+K00128+K00128+K00128+K14085+K00128+K00128+K00128+K00128+K00128+K00128+K00128+K00128+K00128+K00128+K00128+K00128+K14085+K00128+K00128+K00128+K14085+K00128+K00128+K00128+K00128+K00128+K00128+K18649+K18649+K18649+K18649+K01663+K01663+K00765+K01693+K00817+K01814+K00765+K00765+K01663+K01814+K01693+K11755+K00765+K00013+K00817+K01590+K00765+K01590+K11755+K11755+K00013+…
Metabolism	Metabolism of other amino acids	Taurine and hypotaurine metabolism	80	ko00430	BnaA01g27830D;BnaA02g03530D;BnaA02g26140D;BnaA03g06510D;BnaA03g06520D;BnaA03g06540D;BnaA03g06580D;BnaA05g22490D;BnaA06g19240D;BnaA07g25530D;BnaA09g18890D;BnaAnng27540D;BnaC01g34660D;BnaC02g07250D;BnaC02g34260D;BnaC03g08350D;BnaC03g08420D;BnaC03g54190D;BnaC03g54200D;BnaC03g54210D;BnaC04g12030D;BnaC04g12040D;BnaC05g35750D;BnaC06g27330D;BnaC09g40620D;BnaC09g52280D;BnaCnng71810D;BnaA01g05630D;BnaA01g…	K01580+K01580+K01580+K01580+K01580+K01580+K01580+K01580+K01580+K01580+K01580+K01580+K01580+K01580+K01580+K01580+K01580+K01580+K01580+K01580+K01580+K01580+K01580+K01580+K01580+K01580+K01580+K18592+K18592+K18592+K10712+K18592+K18592+K18592+K10712+K10712+K10712+K10712+K10712+K18592+K18592+K18592+K18592+K18592+K10712+K10712+K18592+K18592+K18592+K18592+K10712+K10712+K10712+K18592+K18592+K10712+K10712+…
Metabolism	Carbohydrate metabolism	Butanoate metabolism	79	ko00650	BnaA02g30030D;BnaA06g30370D;BnaA09g02880D;BnaA09g18440D;BnaC02g38440D;BnaC02g38450D;BnaC07g26300D;BnaC09g02300D;BnaC09g20370D;BnaA02g21580D;BnaA03g22610D;BnaA07g12930D;BnaA09g21330D;BnaC03g26640D;BnaC04g17200D;BnaC09g23740D;BnaCnng23810D;BnaCnng45000D;BnaA01g24820D;BnaA01g27830D;BnaA02g03530D;BnaA02g26140D;BnaA02g36110D;BnaA03g06510D;BnaA03g06520D;BnaA03g06540D;BnaA03g06580D;BnaA05g17400D;BnaA05g…	K00626+K00626+K00626+K00626+K00626+K00626+K00626+K00626+K00626+K01641+K01640+K01640+K01641+K01640+K01640+K01641+K01641+K01641+K16871+K01580+K01580+K01580+K17761+K01580+K01580+K01580+K01580+K16871+K16871+K16871+K01580+K01580+K01580+K17761+K01580+K01580+K01580+K01580+K01580+K16871+K01580+K01580+K16871+K01580+K01580+K01580+K01580+K01580+K16871+K01580+K01580+K17761+K01580+K01580+K16871+K01580+K01652+…
Metabolism	Metabolism of cofactors and vitamins	One carbon pool by folate	79	ko00670	BnaA04g20480D;BnaA04g29080D;BnaA04g29090D;BnaA05g08860D;BnaA05g22660D;BnaA09g25330D;BnaA09g32200D;BnaC02g30640D;BnaC04g10270D;BnaC09g34460D;BnaC09g35880D;BnaC09g46490D;BnaCnng04570D;BnaCnng21150D;BnaCnng21160D;BnaCnng76090D;BnaA01g02590D;BnaA03g23120D;BnaA03g39030D;BnaA03g52900D;BnaC01g03830D;BnaC03g27330D;BnaC03g46190D;BnaC07g45090D;BnaA01g00170D;BnaA04g06460D;BnaA07g19490D;BnaA07g23560D;BnaA07g…	K00602+K00602+K00602+K00602+K00602+K00601+K00602+K00602+K00602+K00602+K00602+K00602+K00602+K00601+K00601+K00602+K13998+K13998+K13998+K13998+K13998+K13998+K13998+K13998+K00600+K00600+K00600+K00600+K00600+K00600+K00600+K00600+K00600+K00605+K00605+K00600+K00600+K00600+K00600+K00600+K00600+K00600+K00600+K00600+K00600+K00600+K00600+K00600+K00605+K00600+K00605+K00600+K00600+K00600+K01433+K01433+K01433+…
Metabolism	Metabolism of cofactors and vitamins	Folate biosynthesis	78	ko00790	BnaA04g12070D;BnaA09g43270D;BnaC04g33630D;BnaC08g35890D;BnaA01g02590D;BnaA03g23120D;BnaA03g39030D;BnaA03g52900D;BnaC01g03830D;BnaC03g27330D;BnaC03g46190D;BnaC07g45090D;BnaA02g06860D;BnaA06g23420D;BnaA09g06790D;BnaA09g42620D;BnaC03g49870D;BnaC08g35080D;BnaC09g06310D;BnaCnng50900D;BnaA01g06970D;BnaA01g08590D;BnaA01g31960D;BnaA01g31970D;BnaA01g32400D;BnaA02g19000D;BnaA02g19660D;BnaA02g30310D;BnaA03g…	K00011+K00011+K00011+K00011+K13998+K13998+K13998+K13998+K13998+K13998+K13998+K13998+K14652+K14652+K14652+K14652+K14652+K14652+K14652+K14652+K13941+K01930+K01930+K01930+K01495+K01307+K20457+K01495+K01930+K18482+K20457+K13950+K03635+K03635+K01633+K01633+K01495+K20457+K13950+K01307+K01307+K01930+K20457+K01113+K01930+K01930+K01633+K03635+K13941+K01930+K01930+K01930+K01930+K20457+K01307+K01495+K01930+…
Metabolism	Lipid metabolism	Biosynthesis of unsaturated fatty acids	78	ko01040	BnaA01g32860D;BnaA03g20420D;BnaA03g28050D;BnaA05g03490D;BnaA05g33500D;BnaA10g18080D;BnaA10g18090D;BnaAnng15210D;BnaAnng26040D;BnaC03g24420D;BnaC03g33080D;BnaC04g03030D;BnaC05g48250D;BnaC09g41580D;BnaC09g41590D;BnaA01g32810D;BnaA02g13310D;BnaA02g36400D;BnaA03g02950D;BnaA03g27090D;BnaA05g30890D;BnaA07g26670D;BnaA07g36830D;BnaA09g28160D;BnaA09g34930D;BnaA10g00290D;BnaA10g18310D;BnaA10g21780D;BnaAnng…	K03921+K03921+K03921+K03921+K03921+K03921+K03921+K03921+K03921+K03921+K03921+K03921+K03921+K03921+K03921+K10249+K10251+K01068+K10703+K01068+K10249+K10251+K10251+K10251+K10258+K01068+K10258+K10703+K10703+K10251+K01068+K10703+K10703+K01068+K01068+K10251+K10249+K10251+K10251+K10251+K10258+K10258+K10703+K10703+K00232+K07513+K07513+K00232+K00232+K07513+K07513+K00232+K07513+K00232+K00232+K00232+K00232+…
Metabolism	Lipid metabolism	Arachidonic acid metabolism	76	ko00590	BnaA03g01150D;BnaA07g17190D;BnaA10g26130D;BnaAnng00900D;BnaC02g02780D;BnaC03g01520D;BnaC03g01530D;BnaCnng07580D;BnaCnng10420D;BnaA01g05630D;BnaA01g05660D;BnaA01g07620D;BnaA03g49420D;BnaA03g49430D;BnaA03g49440D;BnaA06g40450D;BnaA06g40460D;BnaA08g16380D;BnaA08g16390D;BnaA09g02940D;BnaC01g00520D;BnaC01g00530D;BnaC01g00540D;BnaC01g09290D;BnaC03g76200D;BnaC03g76380D;BnaC07g41800D;BnaC07g41810D;BnaC07g…	K14674+K14674+K14674+K14674+K14674+K14674+K14674+K14674+K14674+K18592+K18592+K18592+K18592+K18592+K18592+K18592+K18592+K18592+K18592+K18592+K18592+K18592+K18592+K18592+K18592+K18592+K18592+K18592+K18592+K18592+K18592+K18592+K18592+K18592+K18592+K18592+K18592+K18592+K18592+K00432+K00432+K00432+K00432+K00432+K00432+K00432+K00432+K00432+K00432+K00432+K00432+K00432+K00432+K00432+K00432+K00432+K00432+…
Metabolism	Energy metabolism	Photosynthesis - antenna proteins	75	ko00196	BnaA01g22670D;BnaA02g09700D;BnaA02g18160D;BnaA02g29010D;BnaA03g15830D;BnaA03g24350D;BnaA03g37990D;BnaA03g60230D;BnaA04g00660D;BnaA04g08540D;BnaA04g20150D;BnaA05g05540D;BnaA05g09380D;BnaA05g09400D;BnaA05g09410D;BnaA05g29390D;BnaA06g10520D;BnaA06g17350D;BnaA06g31910D;BnaA07g07560D;BnaA07g07570D;BnaA07g16530D;BnaA08g04190D;BnaA08g17660D;BnaA08g22200D;BnaA08g23760D;BnaA09g02120D;BnaA09g09080D;BnaA09g…	K08909+K08914+K14172+K08913+K08912+K08916+K08913+K08909+K08908+K08915+K08912+K08915+K08912+K08912+K08912+K08915+K08917+K08910+K08913+K08912+K08912+K08907+K08911+K08912+K08908+K08917+K08913+K08912+K08915+K08909+K08916+K08912+K08907+K08917+K08914+K08915+K08912+K08909+K14172+K08913+K08915+K08914+K08914+K08916+K08915+K08912+K08916+K08913+K08915+K08912+K08915+K08912+K08912+K08915+K08917+K08915+K08912+…
Metabolism	Metabolism of other amino acids	Selenocompound metabolism	75	ko00450	BnaA01g19120D;BnaA03g36860D;BnaA05g16830D;BnaA06g14140D;BnaA06g36560D;BnaC01g22950D;BnaC02g30510D;BnaC07g17320D;BnaC08g19100D;BnaCnng62800D;BnaCnng69640D;BnaA02g26010D;BnaA03g19550D;BnaA03g53300D;BnaA04g09580D;BnaA05g02330D;BnaA05g04010D;BnaA06g39230D;BnaA06g40230D;BnaA08g14980D;BnaA09g09100D;BnaA09g09110D;BnaAnng41080D;BnaC01g39590D;BnaC03g23440D;BnaC03g47770D;BnaC03g62310D;BnaC04g02020D;BnaC06g…	K13811+K13811+K13811+K13811+K13811+K13811+K13811+K13811+K13811+K13811+K13811+K00384+K00384+K00384+K00384+K00384+K00384+K00384+K00384+K00384+K00384+K00384+K00384+K00384+K00384+K00384+K00384+K00384+K00384+K00384+K00384+K00384+K00384+K00384+K00384+K00549+K00549+K00549+K01739+K00549+K01760+K01739+K01760+K01760+K01761+K00549+K00549+K01739+K01739+K01760+K01739+K00549+K00549+K00549+K01739+K00549+K01760+…
Metabolism	Glycan biosynthesis and metabolism	Glycosylphosphatidylinositol(GPI)-anchor biosynthesis	68	ko00563	BnaA02g16890D;BnaA07g31470D;BnaC06g35260D;BnaA01g01930D;BnaA02g02330D;BnaA02g05470D;BnaA03g05090D;BnaA03g53390D;BnaA03g56790D;BnaA04g23040D;BnaA05g08920D;BnaA05g30380D;BnaA05g30390D;BnaA05g30440D;BnaA05g33900D;BnaA05g34590D;BnaA06g05070D;BnaA06g10750D;BnaA06g35890D;BnaA07g17610D;BnaA08g23670D;BnaA08g25070D;BnaA09g12910D;BnaA09g36520D;BnaA09g37280D;BnaA09g42490D;BnaA09g47490D;BnaA09g56460D;BnaA10g…	K09658+K09658+K09658+K03858+K05286+K05284+K05286+K03858+K05283+K03861+K03859+K05291+K05291+K05292+K05285+K03861+K05290+K05287+K07541+K03434+K05287+K07542+K05293+K03860+K03434+K05310+K07542+K05287+K05289+K05288+K03857+K03857+K05289+K03858+K03857+K05286+K05288+K05284+K07541+K05283+K03861+K03859+K03860+K03861+K05290+K05287+K05292+K05285+K03434+K07541+K03858+K07542+K05287+K03860+K03434+K05287+K05310+…
Metabolism	Metabolism of cofactors and vitamins	Biotin metabolism	68	ko00780	BnaA01g33740D;BnaA01g33760D;BnaA01g33800D;BnaA02g00390D;BnaA02g17050D;BnaA02g24400D;BnaA03g02830D;BnaA03g37760D;BnaA03g38220D;BnaA04g07030D;BnaA04g07040D;BnaA04g12710D;BnaA05g37330D;BnaA06g13360D;BnaA06g36060D;BnaA07g04370D;BnaA07g09030D;BnaA07g21940D;BnaA07g31890D;BnaA08g19070D;BnaA09g17930D;BnaA09g28100D;BnaA09g42770D;BnaA10g16630D;BnaC01g24410D;BnaC01g26460D;BnaC01g32050D;BnaC01g40290D;BnaC01g…	K00059+K00059+K00059+K02372+K09458+K09458+K02372+K09458+K00208+K00059+K00059+K02372+K00059+K09458+K09458+K00208+K00059+K09458+K09458+K00059+K09458+K00059+K02372+K00059+K09458+K09458+K09458+K00059+K00059+K02372+K09458+K02372+K09458+K00208+K00059+K02372+K02372+K09458+K00059+K00059+K00059+K09458+K09458+K00208+K00059+K09458+K09458+K02372+K09458+K00059+K09458+K00059+K09458+K01942+K19562+K01012+K01012+…
Metabolism	Metabolism of terpenoids and polyketides	Sesquiterpenoid and triterpenoid biosynthesis	68	ko00909	BnaA01g00280D;BnaA01g02510D;BnaA01g02520D;BnaA02g32720D;BnaA02g37020D;BnaA02g37030D;BnaA03g52950D;BnaA03g52960D;BnaA04g06060D;BnaA04g13320D;BnaA06g26710D;BnaA06g26720D;BnaA08g11060D;BnaA09g04980D;BnaA09g14650D;BnaA09g56070D;BnaC01g01280D;BnaC01g03770D;BnaC01g03780D;BnaC02g41390D;BnaC02g41420D;BnaC02g41440D;BnaC02g41470D;BnaC03g65910D;BnaC04g28910D;BnaC04g35400D;BnaC07g30250D;BnaC07g30260D;BnaC07g…	K00511+K00801+K00801+K00511+K00511+K00511+K00801+K00801+K00511+K00511+K00511+K00511+K00801+K00511+K00511+K00511+K00511+K00801+K00801+K00511+K00511+K00511+K00511+K00801+K00511+K00511+K00511+K00511+K00801+K00801+K00511+K00511+K00511+K15891+K15891+K15799+K14184+K14184+K15799+K16205+K14184+K15822+K15815+K15815+K16204+K14184+K14184+K15799+K14184+K14184+K15813+K15799+K15815+K16205+K16205+K15815+K15815+…
Metabolism	Metabolism of cofactors and vitamins	Nicotinate and nicotinamide metabolism	66	ko00760	BnaA01g07270D;BnaA01g18840D;BnaA03g18020D;BnaA07g22920D;BnaA07g30470D;BnaA08g05520D;BnaA08g13350D;BnaC01g08890D;BnaC01g22660D;BnaC02g21670D;BnaC03g21540D;BnaC04g25480D;BnaC06g34050D;BnaC08g09940D;BnaCnng24750D;BnaA03g16640D;BnaA05g07980D;BnaA06g18200D;BnaC03g20050D;BnaC04g07590D;BnaC04g08990D;BnaC04g41280D;BnaC07g05610D;BnaC08g08190D;BnaC08g08200D;BnaA10g19090D;BnaC09g42780D;BnaA01g25380D;BnaA02g…	K01513+K03787+K01081+K03787+K03787+K03787+K01513+K01513+K03787+K03787+K01081+K03787+K03787+K03787+K03787+K01240+K01240+K01240+K01240+K01240+K01240+K01240+K01240+K01240+K01240+K00278+K00278+K00858+K03426+K00858+K00767+K03426+K06210+K00858+K00763+K18551+K01950+K01950+K00858+K00767+K00858+K01950+K18551+K18551+K00763+K03517+K06210+K00858+K00858+K00858+K00767+K03426+K06210+K00858+K01950+K00858+K00858+…
Metabolism	Metabolism of terpenoids and polyketides	Zeatin biosynthesis	59	ko00908	BnaA01g23650D;BnaA01g26240D;BnaA02g04650D;BnaA02g05340D;BnaA02g08420D;BnaA02g12860D;BnaA02g13860D;BnaA03g07860D;BnaA03g19500D;BnaA03g35130D;BnaA03g49660D;BnaA04g00130D;BnaA04g08650D;BnaA04g16010D;BnaA04g23980D;BnaA05g02240D;BnaA07g06300D;BnaA07g24640D;BnaA07g35940D;BnaA09g40400D;BnaA09g52930D;BnaA09g55640D;BnaA10g14370D;BnaA10g16020D;BnaA10g24670D;BnaA10g24680D;BnaA10g24690D;BnaA10g28940D;BnaAnng…	K10760+K10760+K00791+K00279+K00279+K10717+K10760+K00791+K00279+K10760+K00279+K10760+K10717+K00791+K00279+K00279+K10760+K10760+K00279+K00279+K00279+K10760+K00279+K10760+K13493+K13493+K13493+K00279+K10760+K00279+K10760+K10760+K10717+K10760+K00791+K00279+K10760+K10760+K00279+K10760+K10717+K10717+K00791+K00279+K10760+K00279+K00279+K10760+K00279+K00279+K00279+K00279+K10760+K13493+K13493+K10760+K00279+…
Metabolism	Amino acid metabolism	Lysine biosynthesis	54	ko00300	BnaA01g34990D;BnaA02g01540D;BnaA02g09370D;BnaA03g04690D;BnaA05g15970D;BnaA06g09610D;BnaA08g31400D;BnaA09g25320D;BnaA09g26740D;BnaA10g20010D;BnaC01g41010D;BnaC01g41040D;BnaC02g04620D;BnaC02g13450D;BnaC03g06220D;BnaC03g06230D;BnaC05g49480D;BnaC08g16430D;BnaC09g43800D;BnaCnng21170D;BnaCnng48890D;BnaCnng63760D;BnaA03g20590D;BnaA04g01030D;BnaA04g25510D;BnaA04g26190D;BnaA05g04860D;BnaA09g38910D;BnaC03g…	K12524+K00928+K00928+K00928+K00928+K00133+K00133+K12524+K00133+K00928+K12524+K12524+K00928+K00928+K00928+K00928+K00133+K00133+K00928+K12524+K12524+K12524+K00215+K01714+K00215+K01714+K01714+K01714+K00215+K01714+K00215+K01714+K01714+K01714+K10206+K01586+K10206+K10206+K01778+K01778+K10206+K01778+K01586+K01586+K01586+K10206+K01586+K10206+K01778+K10206+K01778+K01778+K01778+K01586
Metabolism	Metabolism of cofactors and vitamins	Thiamine metabolism	52	ko00730	BnaA03g17110D;BnaA03g23470D;BnaA03g27260D;BnaA04g21280D;BnaA04g29220D;BnaA05g06070D;BnaA06g22680D;BnaA06g30580D;BnaA08g07200D;BnaA09g02790D;BnaA09g06550D;BnaAnng32580D;BnaC03g20630D;BnaC03g27800D;BnaC03g32260D;BnaC03g50940D;BnaC04g06280D;BnaC07g26210D;BnaC07g48060D;BnaC08g47170D;BnaC08g47180D;BnaCnng15820D;BnaCnng41710D;BnaA01g35430D;BnaA02g09460D;BnaA02g27980D;BnaA03g11710D;BnaA03g36320D;BnaA03g…	K00939+K00939+K00939+K00939+K00939+K00939+K00939+K00939+K00939+K00939+K00939+K00939+K00939+K00939+K00939+K00939+K00939+K00939+K00939+K00939+K00939+K00939+K00939+K01662+K03146+K03146+K03146+K01662+K01662+K03147+K04487+K04487+K00878+K00949+K04487+K14153+K00949+K03146+K01662+K01662+K01662+K03146+K03147+K00949+K14153+K00878+K01662+K00949+K03146+K01662+K04487+K04487
Metabolism	Glycan biosynthesis and metabolism	Other glycan degradation	51	ko00511	BnaA04g04110D;BnaA04g05180D;BnaA04g05190D;BnaA07g22890D;BnaC04g26290D;BnaC04g26310D;BnaC04g27780D;BnaC06g23860D;BnaC06g23870D;BnaA01g02860D;BnaA01g23710D;BnaA01g31200D;BnaA01g31230D;BnaA01g31250D;BnaA01g31280D;BnaA02g13390D;BnaA02g23500D;BnaA03g04620D;BnaA03g23280D;BnaA03g40310D;BnaA04g03760D;BnaA04g16250D;BnaA06g32690D;BnaA07g06340D;BnaA07g25350D;BnaA09g08040D;BnaA09g23550D;BnaA09g33690D;BnaA09g…	K01190+K12309+K12309+K12309+K01190+K01190+K12309+K12309+K12309+K15923+K17108+K01227+K01227+K01227+K01227+K01206+K17108+K01191+K17108+K01444+K12373+K01206+K01191+K17108+K12373+K01191+K17108+K12373+K12373+K01206+K01227+K15923+K17108+K17108+K01206+K17108+K01191+K01191+K17108+K12373+K01206+K17108+K12373+K01206+K01206+K17108+K01191+K01444+K12373+K01191+K12373
Metabolism	Biosynthesis of other secondary metabolites	Stilbenoid, diarylheptanoid and gingerol biosynthesis	48	ko00945	BnaA03g14000D;BnaA03g14010D;BnaA04g17560D;BnaA04g17570D;BnaA05g11950D;BnaC03g16950D;BnaC03g16960D;BnaC04g14330D;BnaC04g41120D;BnaC04g41130D;BnaA01g15400D;BnaA01g15410D;BnaA02g13460D;BnaA02g13470D;BnaA03g50850D;BnaA07g26750D;BnaA08g11640D;BnaA08g19210D;BnaAnng06470D;BnaC01g18290D;BnaC01g18300D;BnaC02g17730D;BnaC03g77170D;BnaC03g77610D;BnaC06g15030D;BnaC06g29150D;BnaC07g10910D;BnaC07g44690D;BnaC08g…	K00487+K00487+K00487+K00487+K00487+K00487+K00487+K00487+K00487+K00487+K00588+K00588+K00588+K00588+K00588+K00588+K00588+K00588+K00588+K00588+K00588+K00588+K00588+K00588+K00588+K00588+K00588+K00588+K00588+K00588+K00588+K13065+K13065+K13065+K09754+K09754+K09754+K13065+K13065+K13065+K13065+K09754+K09754+K09754+K13065+K13065+K13065+K13065
Metabolism	Biosynthesis of other secondary metabolites	Monobactam biosynthesis	45	ko00261	BnaA01g19120D;BnaA03g36860D;BnaA05g16830D;BnaA06g14140D;BnaA06g36560D;BnaC01g22950D;BnaC02g30510D;BnaC07g17320D;BnaC08g19100D;BnaCnng62800D;BnaCnng69640D;BnaA01g34990D;BnaA02g01540D;BnaA02g09370D;BnaA03g04690D;BnaA05g15970D;BnaA06g09610D;BnaA08g31400D;BnaA09g25320D;BnaA09g26740D;BnaA10g20010D;BnaC01g41010D;BnaC01g41040D;BnaC02g04620D;BnaC02g13450D;BnaC03g06220D;BnaC03g06230D;BnaC05g49480D;BnaC08g…	K13811+K13811+K13811+K13811+K13811+K13811+K13811+K13811+K13811+K13811+K13811+K12524+K00928+K00928+K00928+K00928+K00133+K00133+K12524+K00133+K00928+K12524+K12524+K00928+K00928+K00928+K00928+K00133+K00133+K00928+K12524+K12524+K12524+K00215+K01714+K00215+K01714+K01714+K01714+K00215+K01714+K00215+K01714+K01714+K01714
Metabolism	Lipid metabolism	Linoleic acid metabolism	44	ko00591	BnaA03g01150D;BnaA07g17190D;BnaA10g26130D;BnaAnng00900D;BnaC02g02780D;BnaC03g01520D;BnaC03g01530D;BnaCnng07580D;BnaCnng10420D;BnaA05g14430D;BnaCnng35860D;BnaA01g21450D;BnaA01g36630D;BnaA02g11430D;BnaA02g13230D;BnaA02g16020D;BnaA07g19600D;BnaA07g24860D;BnaA07g24870D;BnaA07g24880D;BnaA07g24960D;BnaA07g38540D;BnaA07g38550D;BnaA08g23120D;BnaA09g45010D;BnaAnng34320D;BnaC01g31590D;BnaC02g15950D;BnaC02g…	K14674+K14674+K14674+K14674+K14674+K14674+K14674+K14674+K14674+K01047+K01047+K15718+K15718+K00454+K00454+K00454+K00454+K00454+K00454+K00454+K00454+K00454+K00454+K00454+K00454+K00454+K15718+K00454+K00454+K00454+K15718+K00454+K00454+K00454+K00454+K00454+K00454+K00454+K00454+K00454+K00454+K00454+K15718+K00454
Metabolism	Carbohydrate metabolism	C5-Branched dibasic acid metabolism	42	ko00660	BnaA01g20380D;BnaA02g02020D;BnaA02g03040D;BnaA02g19640D;BnaA02g19650D;BnaA02g19670D;BnaA03g14730D;BnaA03g20030D;BnaA04g06890D;BnaA04g18470D;BnaA05g03070D;BnaA05g11160D;BnaA05g34440D;BnaA05g34460D;BnaA06g33000D;BnaA07g35490D;BnaA08g05070D;BnaC01g25380D;BnaC02g06500D;BnaC02g22980D;BnaC02g22990D;BnaC02g23010D;BnaC02g28410D;BnaC03g17780D;BnaC03g24020D;BnaC04g12850D;BnaC04g42560D;BnaC04g42590D;BnaC04g…	K01652+K00052+K01653+K00052+K00052+K00052+K01653+K01704+K01703+K01653+K01652+K01653+K01704+K01704+K01652+K00052+K01703+K01652+K01653+K00052+K00052+K00052+K01704+K01653+K01704+K01653+K01653+K01653+K01653+K01704+K01704+K01703+K00052+K01652+K01652+K01652+K01652+K01703+K01703+K01703+K01704+K00052
Metabolism	Metabolism of cofactors and vitamins	Vitamin B6 metabolism	42	ko00750	BnaA01g07140D;BnaA02g16170D;BnaA06g25700D;BnaA06g25710D;BnaA08g13300D;BnaA08g14930D;BnaA09g09210D;BnaC01g08620D;BnaC02g21550D;BnaC03g47860D;BnaC03g62400D;BnaC03g68250D;BnaC06g36090D;BnaC09g09440D;BnaA01g07320D;BnaA01g28260D;BnaA02g06220D;BnaA03g00380D;BnaA03g23330D;BnaA04g08360D;BnaA04g21870D;BnaA07g30540D;BnaA08g23000D;BnaA09g44850D;BnaA10g06870D;BnaA10g13320D;BnaAnng00210D;BnaAnng30500D;BnaC01g…	K01733+K01733+K00831+K00831+K01733+K00831+K00831+K01733+K01733+K00831+K00831+K01733+K01733+K00831+K13248+K06215+K08681+K06215+K00275+K00868+K06215+K13248+K13248+K13248+K05275+K08681+K06215+K13248+K13248+K13248+K06215+K13248+K06215+K00275+K00868+K06215+K13248+K13248+K13248+K13248+K05275+K08681
Metabolism	Metabolism of terpenoids and polyketides	Brassinosteroid biosynthesis	39	ko00905	BnaA01g01320D;BnaA01g35580D;BnaA01g37200D;BnaA02g02150D;BnaA03g01680D;BnaA04g11490D;BnaA04g21780D;BnaA05g25680D;BnaA06g30720D;BnaA07g12890D;BnaA09g02720D;BnaA09g31290D;BnaA10g19320D;BnaA10g24860D;BnaAnng01430D;BnaAnng01440D;BnaAnng19730D;BnaAnng21530D;BnaC01g02330D;BnaC01g23810D;BnaC01g37470D;BnaC02g02210D;BnaC02g05320D;BnaC02g05340D;BnaC02g38080D;BnaC03g02230D;BnaC04g17240D;BnaC04g34320D;BnaC04g…	K12637+K09587+K12638+K12639+K09588+K12640+K09591+K12638+K12640+K15639+K12640+K09587+K12639+K09588+K09588+K09588+K12637+K12640+K12637+K09587+K12638+K09588+K12639+K12639+K12640+K09588+K15639+K12640+K12640+K09591+K15639+K09587+K12638+K12638+K12640+K12637+K12640+K12639+K09588
Genetic Information Processing	Folding, sorting and degradation	Sulfur relay system	38	ko04122	BnaA02g19200D;BnaA06g11040D;BnaA07g20420D;BnaA07g34750D;BnaC02g25610D;BnaC02g25620D;BnaC05g12550D;BnaC06g19960D;BnaC06g39640D;BnaA06g24660D;BnaA06g24670D;BnaA09g07180D;BnaC09g50970D;BnaCnng13300D;BnaA04g25410D;BnaA05g03530D;BnaA09g22650D;BnaAnng34700D;BnaC03g54020D;BnaC04g03060D;BnaC04g49300D;BnaC09g24670D;BnaCnng08640D;BnaA01g00970D;BnaA02g09250D;BnaA03g56920D;BnaA04g26340D;BnaA05g20920D;BnaA07g…	K01011+K01011+K01011+K01011+K01011+K01011+K01011+K01011+K01011+K04487+K04487+K04487+K04487+K04487+K03635+K03635+K21232+K03635+K03635+K03635+K03635+K21232+K03637+K14169+K11996+K12161+K12161+K14168+K14168+K11996+K14168+K14169+K11996+K12161+K14168+K14168+K14169+K11996
Metabolism	Metabolism of cofactors and vitamins	Riboflavin metabolism	35	ko00740	BnaA01g07270D;BnaA03g19740D;BnaA05g02620D;BnaA08g13350D;BnaC01g08890D;BnaC03g23630D;BnaC04g52450D;BnaA01g11320D;BnaA02g06860D;BnaA03g20600D;BnaA03g44660D;BnaA04g25520D;BnaA06g01460D;BnaA06g17470D;BnaA06g23420D;BnaA07g00510D;BnaA07g16630D;BnaA08g09970D;BnaA09g06790D;BnaA09g42620D;BnaC01g12760D;BnaC03g24640D;BnaC03g49870D;BnaC03g64140D;BnaC03g64500D;BnaC03g75520D;BnaC04g49410D;BnaC06g37930D;BnaC07g…	K01513+K18453+K18453+K01513+K01513+K18453+K18453+K20884+K14652+K00794+K11752+K00794+K11752+K11752+K14652+K00793+K00794+K11752+K14652+K14652+K20884+K00794+K14652+K20884+K11752+K11752+K00794+K00794+K00793+K11752+K11752+K14652+K14652+K00793+K14652
Metabolism	Glycan biosynthesis and metabolism	Glycosphingolipid biosynthesis - globo and isoglobo series	34	ko00603	BnaA03g02510D;BnaA09g35760D;BnaAnng06130D;BnaAnng06140D;BnaC02g01150D;BnaC02g01160D;BnaC03g03520D;BnaC03g03530D;BnaC06g12140D;BnaC08g27260D;BnaCnng62740D;BnaA04g03760D;BnaA07g25350D;BnaA09g33690D;BnaA09g50290D;BnaC04g25580D;BnaC06g27130D;BnaC08g44330D;BnaCnng30620D;BnaA05g06500D;BnaA05g06510D;BnaA05g29310D;BnaA09g13920D;BnaA10g27620D;BnaAnng04350D;BnaC01g39240D;BnaC04g06980D;BnaC04g07170D;BnaC04g…	K07407+K07407+K07407+K07407+K07407+K07407+K07407+K07407+K07407+K07407+K07407+K12373+K12373+K12373+K12373+K12373+K12373+K12373+K12373+K01988+K01988+K01988+K01988+K01988+K01988+K01988+K01988+K01988+K01988+K01988+K01988+K01988+K01988+K01988
Metabolism	Metabolism of other amino acids	Phosphonate and phosphinate metabolism	33	ko00440	BnaA01g18750D;BnaA02g27520D;BnaA03g14860D;BnaA03g18010D;BnaA04g22130D;BnaA05g06400D;BnaA05g07270D;BnaA05g10750D;BnaA05g35390D;BnaA06g08550D;BnaA06g33540D;BnaA06g39580D;BnaA09g46210D;BnaAnng16260D;BnaC01g22510D;BnaC02g35520D;BnaC03g21530D;BnaC03g71920D;BnaC04g06660D;BnaC04g12520D;BnaC04g45860D;BnaC05g09920D;BnaC06g11420D;BnaC06g11440D;BnaC07g20830D;BnaC07g22750D;BnaC07g26380D;BnaC07g26390D;BnaC07g…	K00968+K00993+K00968+K00967+K00967+K00967+K00967+K00968+K00968+K00993+K00993+K00967+K00993+K00968+K00968+K00993+K00967+K00968+K00967+K00968+K00967+K00993+K00968+K00968+K00993+K00993+K00967+K00967+K00967+K00967+K00967+K00993+K00968
Metabolism	Metabolism of terpenoids and polyketides	Limonene and pinene degradation	28	ko00903	BnaA01g01360D;BnaA01g02880D;BnaA03g50730D;BnaA03g59170D;BnaA06g16950D;BnaA06g20750D;BnaA07g05850D;BnaA08g04430D;BnaA08g15200D;BnaA08g20300D;BnaA09g29890D;BnaA09g53800D;BnaA10g08800D;BnaA10g08810D;BnaAnng30530D;BnaC01g02370D;BnaC01g04140D;BnaC03g53360D;BnaC03g61970D;BnaC05g18900D;BnaC05g25340D;BnaC05g26280D;BnaC07g46060D;BnaC08g05150D;BnaC08g06430D;BnaC09g47240D;BnaCnng12150D;BnaCnng49760D	K00128+K00128+K00128+K00128+K00128+K00128+K00128+K00128+K00128+K00128+K00128+K00128+K00128+K00128+K00128+K00128+K00128+K00128+K00128+K00128+K00128+K00128+K00128+K00128+K00128+K00128+K00128+K00128
Metabolism	Glycan biosynthesis and metabolism	Glycosaminoglycan degradation	24	ko00531	BnaA04g05180D;BnaA04g05190D;BnaA07g22890D;BnaC04g27780D;BnaC06g23860D;BnaC06g23870D;BnaA04g03760D;BnaA07g25350D;BnaA09g33690D;BnaA09g50290D;BnaC04g25580D;BnaC06g27130D;BnaC08g44330D;BnaCnng30620D;BnaA02g01810D;BnaA02g31270D;BnaA03g40060D;BnaA08g07260D;BnaA10g23380D;BnaC02g04940D;BnaC02g39830D;BnaC07g31120D;BnaC08g08070D;BnaC09g48030D	K12309+K12309+K12309+K12309+K12309+K12309+K12373+K12373+K12373+K12373+K12373+K12373+K12373+K12373+K01205+K10532+K07964+K07964+K07964+K01205+K10532+K07964+K07964+K07964
Genetic Information Processing	Replication and repair	Non-homologous end-joining	20	ko03450	BnaA06g39510D;BnaC02g40370D;BnaC07g28700D;BnaA08g25700D;BnaC08g14330D;BnaC08g14360D;BnaA03g14800D;BnaA10g07340D;BnaC03g17840D;BnaC09g30690D;BnaA01g24140D;BnaA06g11440D;BnaA08g29690D;BnaA10g11190D;BnaC02g11270D;BnaC05g13070D;BnaC08g03910D;BnaC09g53370D;BnaCnng41270D;BnaCnng53340D	K04799+K04799+K04799+K03512+K03512+K03512+K10866+K10865+K10866+K10865+K10886+K10884+K10885+K10777+K10777+K10884+K10885+K10777+K10886+K10886
Metabolism	Lipid metabolism	Synthesis and degradation of ketone bodies	18	ko00072	BnaA02g30030D;BnaA06g30370D;BnaA09g02880D;BnaA09g18440D;BnaC02g38440D;BnaC02g38450D;BnaC07g26300D;BnaC09g02300D;BnaC09g20370D;BnaA02g21580D;BnaA03g22610D;BnaA07g12930D;BnaA09g21330D;BnaC03g26640D;BnaC04g17200D;BnaC09g23740D;BnaCnng23810D;BnaCnng45000D	K00626+K00626+K00626+K00626+K00626+K00626+K00626+K00626+K00626+K01641+K01640+K01640+K01641+K01640+K01640+K01641+K01641+K01641
Metabolism	Metabolism of terpenoids and polyketides	Monoterpenoid biosynthesis	17	ko00902	BnaA03g22980D;BnaA03g24650D;BnaA04g00820D;BnaA06g33340D;BnaA06g33360D;BnaA09g13640D;BnaA09g13650D;BnaA09g39000D;BnaAnng14460D;BnaC03g27100D;BnaC07g22980D;BnaC07g23000D;BnaC08g31160D;BnaC08g34130D;BnaCnng38820D;BnaCnng52840D;BnaCnng60530D	K12467+K12467+K15095+K07385+K07385+K15086+K15086+K15095+K15095+K12467+K07385+K07385+K15095+K12467+K15086+K07385+K12467
Metabolism	Glycan biosynthesis and metabolism	Glycosphingolipid biosynthesis - lacto and neolacto series	15	ko00601	BnaA05g06500D;BnaA05g06510D;BnaA05g29310D;BnaA09g13920D;BnaA10g27620D;BnaAnng04350D;BnaC01g39240D;BnaC04g06980D;BnaC04g07170D;BnaC04g07180D;BnaCnng03910D;BnaCnng11840D;BnaCnng18920D;BnaCnng24210D;BnaCnng55220D	K01988+K01988+K01988+K01988+K01988+K01988+K01988+K01988+K01988+K01988+K01988+K01988+K01988+K01988+K01988
Metabolism	Metabolism of cofactors and vitamins	Lipoic acid metabolism	15	ko00785	BnaA01g06090D;BnaA03g55730D;BnaA08g12720D;BnaA08g27980D;BnaA09g43570D;BnaA10g02780D;BnaAnng06100D;BnaC01g07340D;BnaC02g01120D;BnaC03g03580D;BnaC03g77390D;BnaC05g49020D;BnaC08g00810D;BnaC08g00840D;BnaC08g36170D	K03801+K03644+K03801+K03801+K03644+K03801+K03644+K03801+K03644+K03644+K03801+K03801+K03801+K03801+K03644
Metabolism	Glycan biosynthesis and metabolism	Glycosphingolipid biosynthesis - ganglio series	14	ko00604	BnaA04g05180D;BnaA04g05190D;BnaA07g22890D;BnaC04g27780D;BnaC06g23860D;BnaC06g23870D;BnaA04g03760D;BnaA07g25350D;BnaA09g33690D;BnaA09g50290D;BnaC04g25580D;BnaC06g27130D;BnaC08g44330D;BnaCnng30620D	K12309+K12309+K12309+K12309+K12309+K12309+K12373+K12373+K12373+K12373+K12373+K12373+K12373+K12373
Metabolism	Biosynthesis of other secondary metabolites	Indole alkaloid biosynthesis	11	ko00901	BnaA02g16660D;BnaA02g16670D;BnaA07g22440D;BnaA07g31170D;BnaA07g31180D;BnaC02g22570D;BnaC02g22590D;BnaC06g34860D;BnaC06g34870D;BnaCnng49890D;BnaCnng49900D	K01757+K01757+K01757+K01757+K01757+K01757+K01757+K01757+K01757+K01757+K01757
Metabolism	Glycan biosynthesis and metabolism	Other types of O-glycan biosynthesis	8	ko00514	BnaA01g33640D;BnaA02g11710D;BnaA06g00720D;BnaA08g23210D;BnaC01g40190D;BnaC02g16100D;BnaC06g06570D;BnaC08g17290D	K09667+K03691+K03691+K03691+K09667+K03691+K03691+K03691
Metabolism	Biosynthesis of other secondary metabolites	Caffeine metabolism	7	ko00232	BnaA01g02300D;BnaA07g06460D;BnaA09g00610D;BnaC01g03570D;BnaC05g26830D;BnaC07g08000D;BnaCnng46690D	K00106+K00365+K00106+K00106+K00106+K00365+K00106
Metabolism	Biosynthesis of other secondary metabolites	Aflatoxin biosynthesis	6	ko00254	BnaA06g04070D;BnaA08g06180D;BnaAnng41100D;BnaC06g01580D;BnaC08g06560D;BnaCnng75250D	K11262+K11262+K11262+K11262+K11262+K11262
Metabolism	Metabolism of terpenoids and polyketides	Polyketide sugar unit biosynthesis	5	ko00523	BnaA06g08030D;BnaA09g12970D;BnaC09g12890D;BnaCnng31530D;BnaCnng77810D	K12451+K12451+K12451+K12451+K12451
Metabolism	Biosynthesis of other secondary metabolites	Flavone and flavonol biosynthesis	4	ko00944	BnaA10g23330D;BnaC09g47980D;BnaA02g03370D;BnaC02g06990D	K05280+K05280+K10757+K10757
Metabolism	Biosynthesis of other secondary metabolites	Anthocyanin biosynthesis	3	ko00942	BnaA08g07620D;BnaC08g08350D;BnaCnng74370D	K12338+K12338+K17193
