# Supplementary material for: Analysis of Tissue-Specific Defense Responses to Sclerotinia sclerotiorum in Brassica napus
Source: Plants (Basel). 2022 Jul 31;11(15):2001. doi: 10.3390/plants11152001 (PMC9370628; doi:10.3390/plants11152001)
Supplement: Supplementary file 1 [file plants-11-02001-s001.zip › plants-1826220-supplementary/Table S5.xlsx]

## Sheet: Table S5
Supplementary table 5 - GO enrichment result
GO ID (level1)	GO Term (level1)	GO ID (level2)	GO Term (level2)	number_of_out (All)	Genes_of_out
GO:0008150	Biological Process	GO:0050896	response to stimulus	34	BnaA02g17670D,BnaA03g28150D,BnaA05g00280D,BnaA05g24540D,BnaA05g33290D,BnaA06g01730D,BnaA06g11500D,BnaA06g12450D,BnaA06g39220D,BnaA07g06530D,BnaA07g21320D,BnaA08g11390D,BnaA10g03720D,BnaC01g39170D,BnaC02g24210D,BnaC03g11570D,BnaC04g40560D,BnaC04g52990D,BnaC05g03670D,BnaC05g13350D,BnaC05g14050D,BnaC06g05910D,BnaC06g26190D,BnaC07g47900D,BnaC08g17880D,BnaC08g37940D,BnaC09g35160D,BnaCnng06000D,BnaCnng…
GO:0008150	Biological Process	GO:0051704	multi-organism process	13	BnaA03g28150D,BnaA05g00280D,BnaA05g33290D,BnaA08g11390D,BnaC03g11570D,BnaC04g52990D,BnaC06g05910D,BnaC06g26190D,BnaC09g35160D,BnaCnng06000D,BnaCnng24580D,BnaCnng67070D,BnaCnng69780D
GO:0008150	Biological Process	GO:0001906	cell killing	1	BnaC04g52990D
GO:0008150	Biological Process	GO:0002376	immune system process	7	BnaA03g28150D,BnaA05g33290D,BnaA07g21320D,BnaC06g05910D,BnaCnng06000D,BnaCnng67070D,BnaCnng69780D
GO:0008150	Biological Process	GO:0023052	signaling	10	BnaA03g28150D,BnaA05g33290D,BnaA07g21320D,BnaC03g11570D,BnaC06g05910D,BnaC09g35160D,BnaCnng06000D,BnaCnng24580D,BnaCnng67070D,BnaCnng69780D
GO:0008150	Biological Process	GO:0048519	negative regulation of biological process	7	BnaA03g28150D,BnaA05g33290D,BnaC06g05910D,BnaC09g35160D,BnaCnng06000D,BnaCnng67070D,BnaCnng69780D
GO:0008150	Biological Process	GO:0044699	single-organism process	34	BnaA02g03750D,BnaA02g04350D,BnaA02g17670D,BnaA03g16830D,BnaA03g28150D,BnaA05g07580D,BnaA05g24540D,BnaA05g33290D,BnaA05g37410D,BnaA06g11500D,BnaA06g39220D,BnaA07g06530D,BnaA07g21320D,BnaA08g11390D,BnaA10g03720D,BnaC01g39170D,BnaC02g24210D,BnaC03g11570D,BnaC04g08440D,BnaC04g40560D,BnaC05g03670D,BnaC05g13350D,BnaC06g05910D,BnaC06g26190D,BnaC07g47900D,BnaC08g37940D,BnaC09g35160D,BnaCnng06000D,BnaCnng…
GO:0008150	Biological Process	GO:0051179	localization	14	BnaA02g03750D,BnaA02g04350D,BnaA03g28150D,BnaA05g33290D,BnaA05g37410D,BnaA06g39220D,BnaA07g06530D,BnaC06g05910D,BnaC06g26190D,BnaC07g47900D,BnaCnng06000D,BnaCnng25440D,BnaCnng67070D,BnaCnng69780D
GO:0008150	Biological Process	GO:0071840	cellular component organization or biogenesis	14	BnaA03g28150D,BnaA05g33290D,BnaA06g11500D,BnaA10g03720D,BnaC01g39170D,BnaC04g40560D,BnaC05g03670D,BnaC05g13350D,BnaC06g05910D,BnaC06g26190D,BnaC08g37940D,BnaCnng06000D,BnaCnng67070D,BnaCnng69780D
GO:0008150	Biological Process	GO:0065007	biological regulation	19	BnaA03g16830D,BnaA03g28150D,BnaA05g07580D,BnaA05g24540D,BnaA05g33290D,BnaA05g37410D,BnaA07g21320D,BnaC03g11570D,BnaC04g08440D,BnaC04g52990D,BnaC06g05910D,BnaC06g26190D,BnaC07g47900D,BnaC09g35160D,BnaCnng06000D,BnaCnng24580D,BnaCnng25440D,BnaCnng67070D,BnaCnng69780D
GO:0008150	Biological Process	GO:0008152	metabolic process	32	BnaA02g03750D,BnaA02g17670D,BnaA03g16830D,BnaA03g28150D,BnaA05g07580D,BnaA05g24540D,BnaA05g33290D,BnaA05g37410D,BnaA06g11500D,BnaA07g06530D,BnaA07g21320D,BnaA08g11390D,BnaA10g03720D,BnaC01g39170D,BnaC02g24210D,BnaC03g11570D,BnaC03g41040D,BnaC04g08440D,BnaC04g40560D,BnaC05g03670D,BnaC05g13350D,BnaC06g05910D,BnaC06g26190D,BnaC08g37940D,BnaC09g35160D,BnaCnng06000D,BnaCnng14680D,BnaCnng24580D,BnaCnng…
GO:0008150	Biological Process	GO:0050789	regulation of biological process	13	BnaA03g28150D,BnaA05g24540D,BnaA05g33290D,BnaA05g37410D,BnaA07g21320D,BnaC03g11570D,BnaC06g05910D,BnaC06g26190D,BnaC09g35160D,BnaCnng06000D,BnaCnng24580D,BnaCnng67070D,BnaCnng69780D
GO:0008150	Biological Process	GO:0040007	growth	1	BnaC09g35160D
GO:0008150	Biological Process	GO:0048518	positive regulation of biological process	1	BnaA05g24540D
GO:0008150	Biological Process	GO:0009987	cellular process	29	BnaA02g03750D,BnaA02g04350D,BnaA02g17670D,BnaA03g28150D,BnaA05g24540D,BnaA05g33290D,BnaA05g37410D,BnaA06g11500D,BnaA06g39220D,BnaA07g06530D,BnaA07g21320D,BnaA10g03720D,BnaC01g39170D,BnaC02g24210D,BnaC03g11570D,BnaC04g40560D,BnaC05g03670D,BnaC05g13350D,BnaC06g05910D,BnaC06g26190D,BnaC07g47900D,BnaC08g37940D,BnaC09g35160D,BnaCnng06000D,BnaCnng24580D,BnaCnng25440D,BnaCnng35440D,BnaCnng67070D,BnaCnng…
GO:0008150	Biological Process	GO:0032501	multicellular organismal process	6	BnaA02g03750D,BnaA02g17670D,BnaA05g37410D,BnaA06g39220D,BnaC02g24210D,BnaC06g05910D
GO:0008150	Biological Process	GO:0032502	developmental process	6	BnaA02g03750D,BnaA02g17670D,BnaA05g37410D,BnaA06g39220D,BnaC02g24210D,BnaC06g05910D
GO:0008150	Biological Process	GO:0022414	reproductive process	1	BnaA06g39220D
GO:0008150	Biological Process	GO:0000003	reproduction	1	BnaA06g39220D
GO:0003674	Molecular Function	GO:0003824	catalytic activity	24	BnaA02g17670D,BnaA03g16830D,BnaA05g07580D,BnaA05g24540D,BnaA06g11500D,BnaA06g12450D,BnaA08g11390D,BnaA10g03720D,BnaC01g39170D,BnaC02g24210D,BnaC02g35940D,BnaC03g41040D,BnaC04g08440D,BnaC04g40560D,BnaC05g03670D,BnaC05g13350D,BnaC05g14050D,BnaC06g26190D,BnaC08g17880D,BnaC08g37940D,BnaCnng14680D,BnaCnng25440D,BnaCnng35440D,BnaCnng69780D
GO:0003674	Molecular Function	GO:0098772	molecular function regulator	2	BnaC04g52990D,BnaCnng69780D
GO:0003674	Molecular Function	GO:0005215	transporter activity	5	BnaA02g03750D,BnaA02g04350D,BnaA06g39220D,BnaA07g06530D,BnaC07g47900D
GO:0003674	Molecular Function	GO:0001071	nucleic acid binding transcription factor activity	5	BnaA05g37410D,BnaC03g11570D,BnaC06g05910D,BnaC09g35160D,BnaCnng67070D
GO:0003674	Molecular Function	GO:0005488	binding	17	BnaA02g17670D,BnaA05g24540D,BnaA05g37410D,BnaA06g11500D,BnaA10g03720D,BnaC02g24210D,BnaC02g35940D,BnaC03g11570D,BnaC05g03670D,BnaC05g13350D,BnaC06g05910D,BnaC06g26190D,BnaC08g37940D,BnaC09g35160D,BnaCnng14680D,BnaCnng25440D,BnaCnng67070D
GO:0005575	Cellular Component	GO:0044425	membrane part	5	BnaA02g03750D,BnaA02g04350D,BnaA06g28230D,BnaA07g06530D,BnaC07g28660D
GO:0005575	Cellular Component	GO:0005623	cell	38	BnaA02g04350D,BnaA02g17670D,BnaA03g16830D,BnaA03g28150D,BnaA05g00280D,BnaA05g24540D,BnaA05g33290D,BnaA05g37410D,BnaA06g01730D,BnaA06g11500D,BnaA06g12450D,BnaA06g28230D,BnaA06g39220D,BnaA07g06530D,BnaA07g21320D,BnaA10g03720D,BnaC01g39170D,BnaC02g24210D,BnaC03g11570D,BnaC03g22030D,BnaC03g41040D,BnaC04g04780D,BnaC04g40560D,BnaC05g03670D,BnaC05g13350D,BnaC05g14050D,BnaC06g05910D,BnaC06g26190D,BnaC07g…
GO:0005575	Cellular Component	GO:0044464	cell part	38	BnaA02g04350D,BnaA02g17670D,BnaA03g16830D,BnaA03g28150D,BnaA05g00280D,BnaA05g24540D,BnaA05g33290D,BnaA05g37410D,BnaA06g01730D,BnaA06g11500D,BnaA06g12450D,BnaA06g28230D,BnaA06g39220D,BnaA07g06530D,BnaA07g21320D,BnaA10g03720D,BnaC01g39170D,BnaC02g24210D,BnaC03g11570D,BnaC03g22030D,BnaC03g41040D,BnaC04g04780D,BnaC04g40560D,BnaC05g03670D,BnaC05g13350D,BnaC05g14050D,BnaC06g05910D,BnaC06g26190D,BnaC07g…
GO:0005575	Cellular Component	GO:0055044	symplast	2	BnaA05g24540D,BnaC03g22030D
GO:0005575	Cellular Component	GO:0030054	cell junction	2	BnaA05g24540D,BnaC03g22030D
GO:0005575	Cellular Component	GO:0031974	membrane-enclosed lumen	1	BnaA07g21320D
GO:0005575	Cellular Component	GO:0043226	organelle	28	BnaA02g04350D,BnaA03g16830D,BnaA03g28150D,BnaA05g00280D,BnaA05g24540D,BnaA05g33290D,BnaA05g37410D,BnaA06g01730D,BnaA06g12450D,BnaA06g28230D,BnaA07g06530D,BnaA07g21320D,BnaA10g03720D,BnaC03g11570D,BnaC03g22030D,BnaC03g41040D,BnaC04g04780D,BnaC05g03670D,BnaC05g14050D,BnaC06g05910D,BnaC06g26190D,BnaC07g28660D,BnaC08g17880D,BnaC09g35160D,BnaCnng06000D,BnaCnng24580D,BnaCnng25440D,BnaCnng67070D
GO:0005575	Cellular Component	GO:0016020	membrane	10	BnaA02g03750D,BnaA02g04350D,BnaA05g00280D,BnaA05g24540D,BnaA06g28230D,BnaA06g39220D,BnaA07g06530D,BnaC06g26190D,BnaC07g28660D,BnaC07g47900D
GO:0005575	Cellular Component	GO:0005576	extracellular region	2	BnaC04g52990D,BnaCnng69780D
GO:0005575	Cellular Component	GO:0044422	organelle part	4	BnaA05g24540D,BnaA07g06530D,BnaA07g21320D,BnaC06g26190D
