# Supplementary material for: Analysis of Tissue-Specific Defense Responses to Sclerotinia sclerotiorum in Brassica napus
Source: Plants (Basel). 2022 Jul 31;11(15):2001. doi: 10.3390/plants11152001 (PMC9370628; doi:10.3390/plants11152001)
Supplement: Supplementary file 1 [file plants-11-02001-s001.zip › plants-1826220-supplementary/Table S6.xlsx]

## Sheet: Sheet1
Supplementary table 6 - Primers used in this research
Gene	F-primer	r-primer
BnaC07g47900D	GAACAGTTAGTCCCCAGTACAA	CCATACATAATGCTGAAACCGG
BnaC05g03670D	CAACCTCTCTTTCCTTGCTTTC	TTGTTCTTGAGGTTCAGAGACC
BnaC05g14050D	TACAAGAAACGACAAGGCAATG	ATCAATCTCCCAACCTCCTTTT
BnaA08g11390D	GCTAGTTATTGCATCAGAGTGC	CGCTTCTGATTCTAAAACCTCG
BnaC01g39170D	AAATCGATAGCTGAGTCTCTGG	CAAGCCTTCCACAATGTTAACA
BnaA07g21320D	GTTGAATCAGCCTAATGAACGG	CGTTTTATTCGGTAGGTTTCCC
Bn-actin	CTGGAATTGCTGACCGTATGAG	ATCTGTTGGAAAGTGCTGAGGG
